# Supplementary material for: Highly regioselective oxidative Csp2–H amination for indolosesquiterpene alkaloids: total synthesis of (+)-dioridamycin
Source: Royal Society of Chemistry journal article supplement (doi:10.1039/d4qo01773k), 2024-11-26
Supplement: d4qo01773k1.pdf [file d4qo01773k1.pdf]

Supplemental material for:

**Highly Regioselective Oxidative Csp<sup>2</sup>-H Amination for  
Indolosesquiterpene Alkaloids: Total Synthesis of (+)-  
Dioridamycin**

Rhituparna Nandi,<sup>§a</sup> Sovan Niyogi,<sup>§b</sup> Sourav Kundu,<sup>b</sup> Ayan Mondal,<sup>b</sup> Nanda Kishore Roy,<sup>b</sup>  
and Alakesh Bisai<sup>\*a,b</sup>

<sup>a</sup>Department of Chemistry, Indian Institute of Science Education and Research Bhopal,  
Bhopal Bypass Road, Bhopal, MP - 462 066, India.

<sup>b</sup>Department of Chemical Sciences, Indian Institute of Science Education and Research  
Kolkata, Mohanpur, Nadia, WB - 741 246, India.

e-Mail: [alakesh@iiserkol.ac.in](mailto:alakesh@iiserkol.ac.in), [alakeshb@gmail.com](mailto:alakeshb@gmail.com)

# Spectral Traces

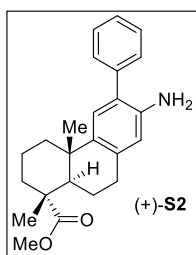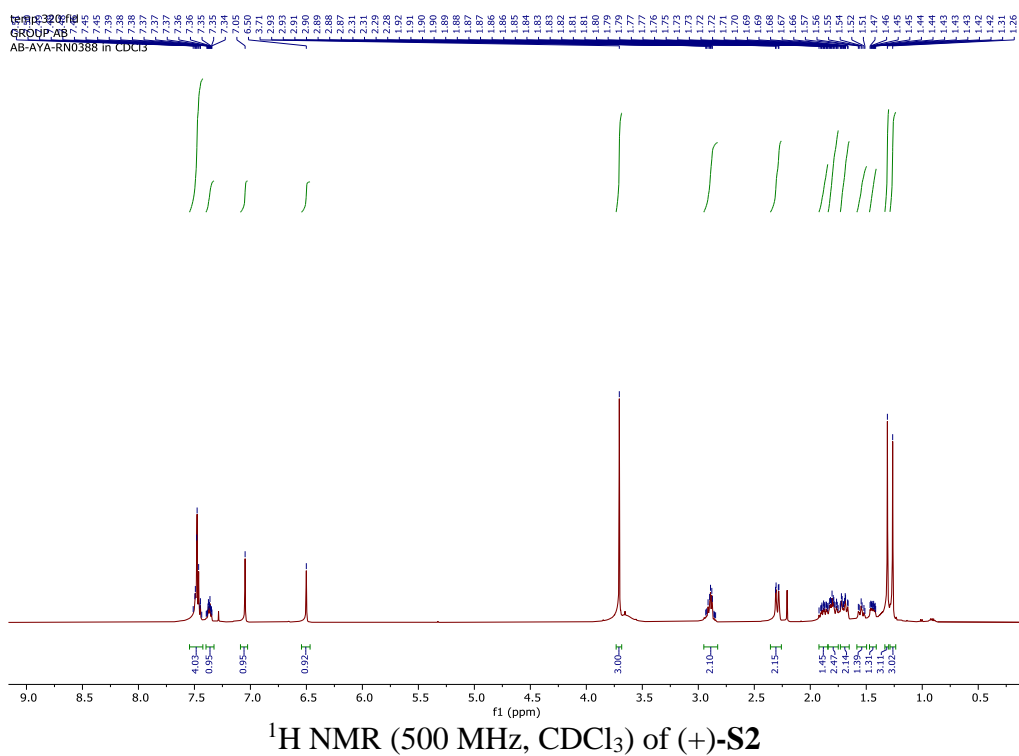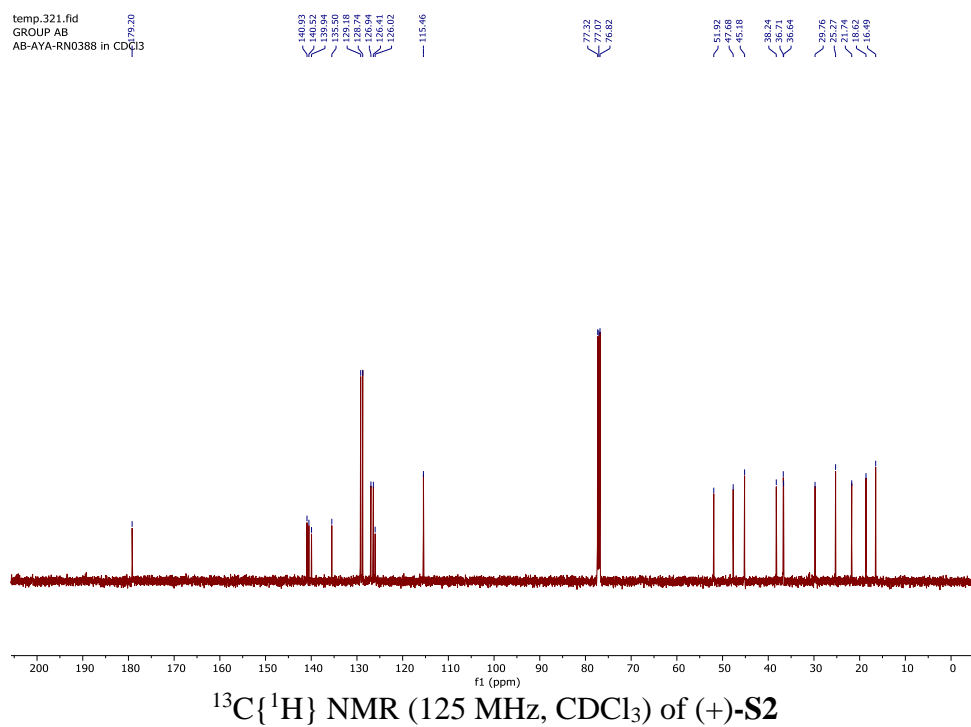

AB18-Apr-2024 13:33:02

AB-SOV-02010 (0.172) Is (1.00,1.00) C<sub>24</sub>H<sub>30</sub>NO<sub>2</sub>

IISER - KOLKATA

1: TOF MS ES+  
7.63e12

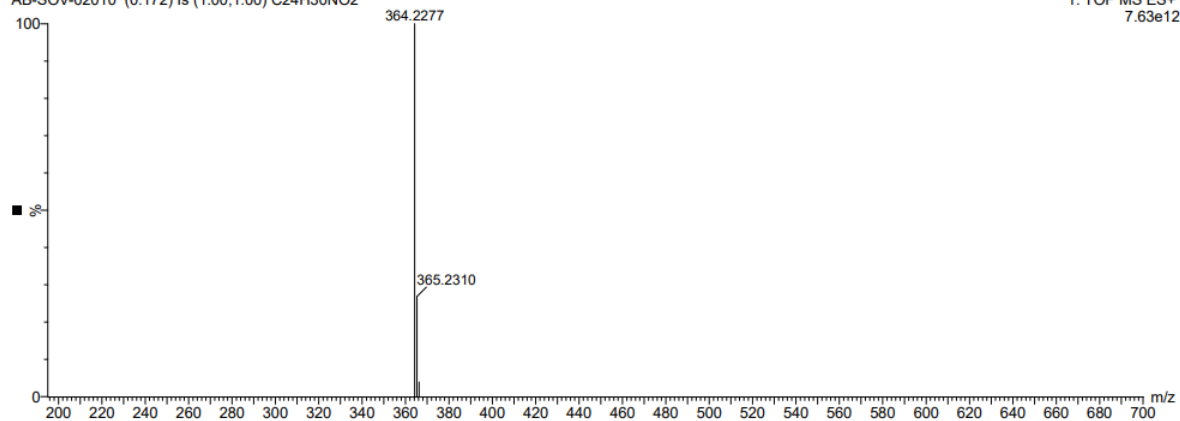

AB-SOV-02010 8 (0.172)

1: TOF MS ES+  
5.98e6

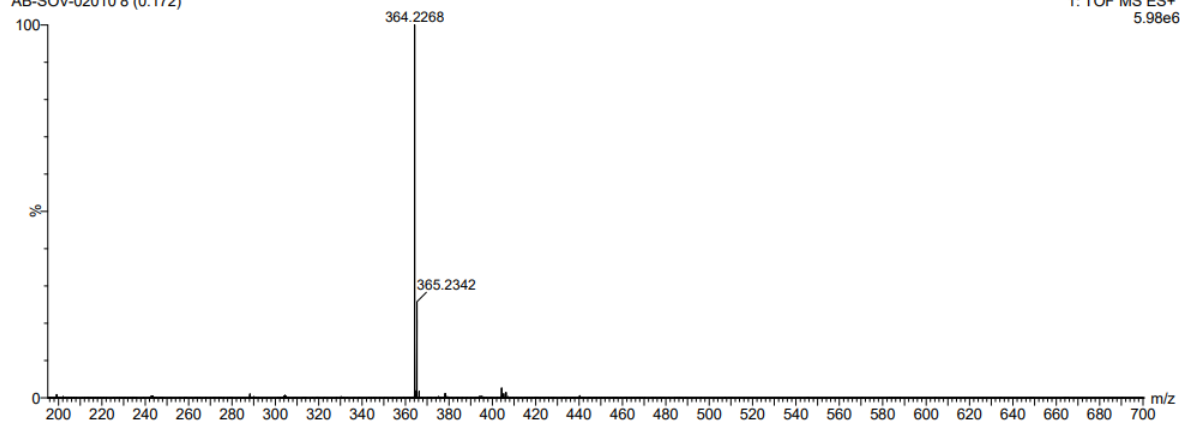

HRMS data of (+)-S2

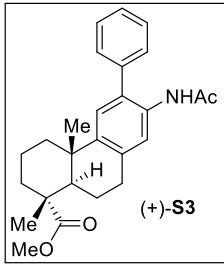

temp.920.fid  
GROUP AB  
AB-AYA-RN0393 in CDCl<sub>3</sub>

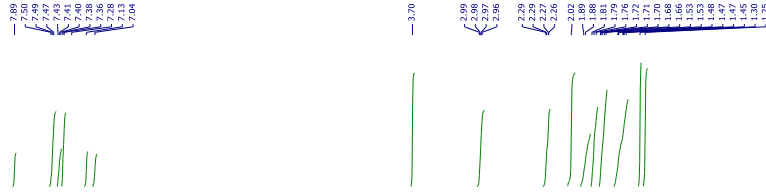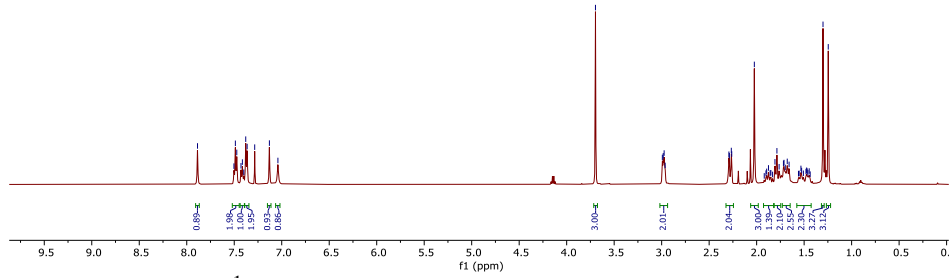

<sup>1</sup>H NMR (500 MHz, CDCl<sub>3</sub>) of (+)-S3

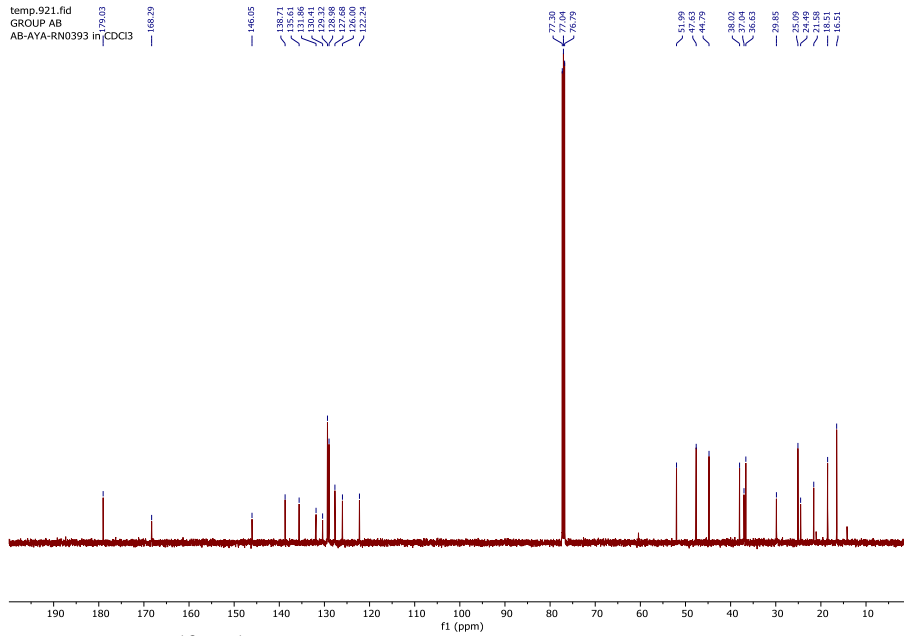

<sup>13</sup>C{<sup>1</sup>H} NMR (125 MHz, CDCl<sub>3</sub>) of (+)-S3

AB26-Apr-2024 13:54:31  
AB-AYA-02280C (0.053) Is (1.00,1.00) C<sub>26</sub>H<sub>30</sub>NO<sub>3</sub>

IISER - KOLKATA

1: TOF MS ES+  
7.45e12

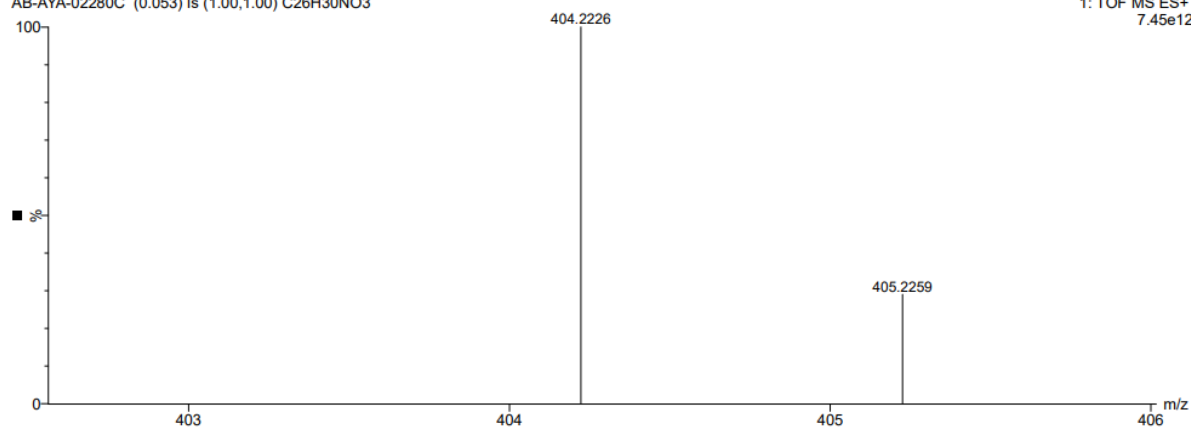

AB-AYA-02280C 4 (0.104) AM2 (Ar,22000.0,556.28,0.00,LS 10); ABS

1: TOF MS ES+  
7.26e5

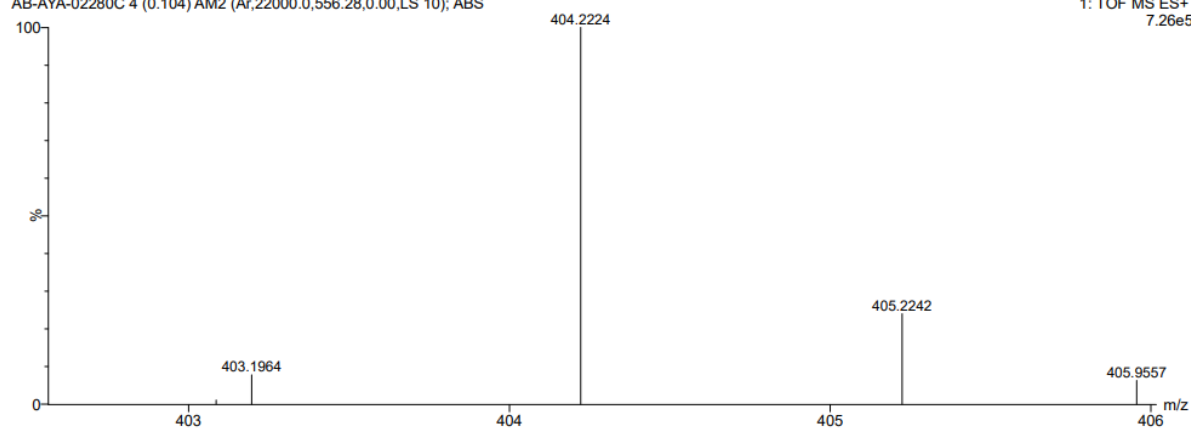

HRMS data of (+)-S3

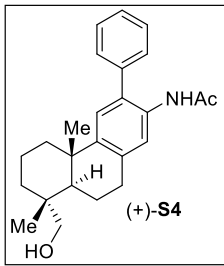

temp.840.fid  
GROUP AB  
AB-AYA-RN03011 in CDCl<sub>3</sub>

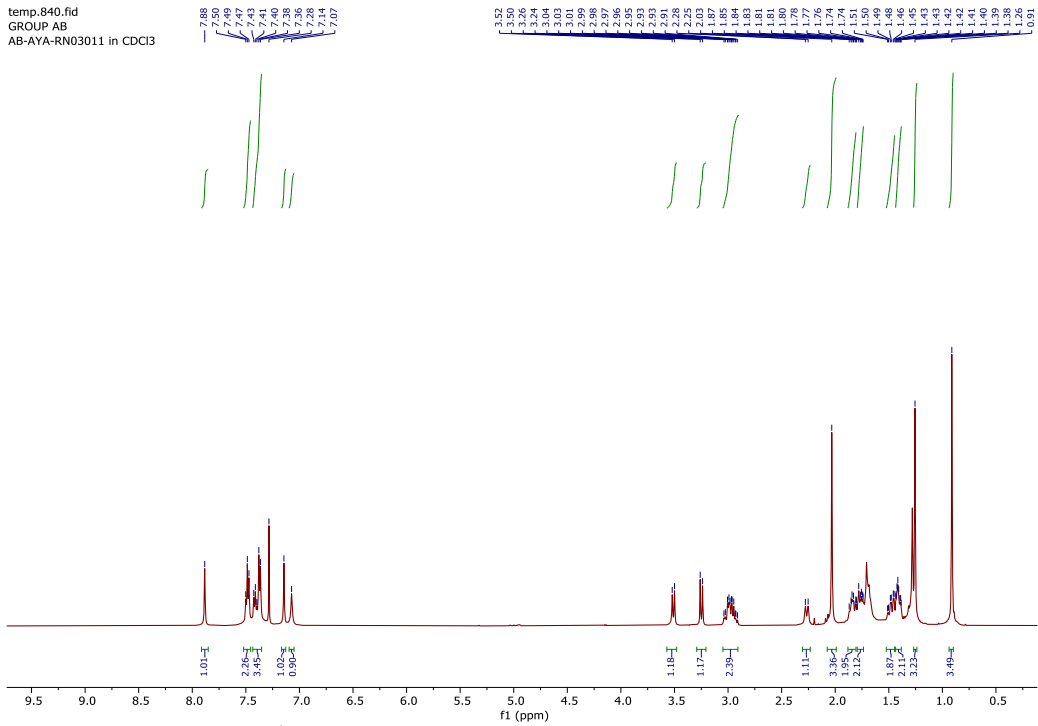

<sup>1</sup>H NMR (500 MHz, CDCl<sub>3</sub>) of (+)-S4

temp.841.fid  
GROUP AB  
AB-AYA-RN03011 in CDCl<sub>3</sub>

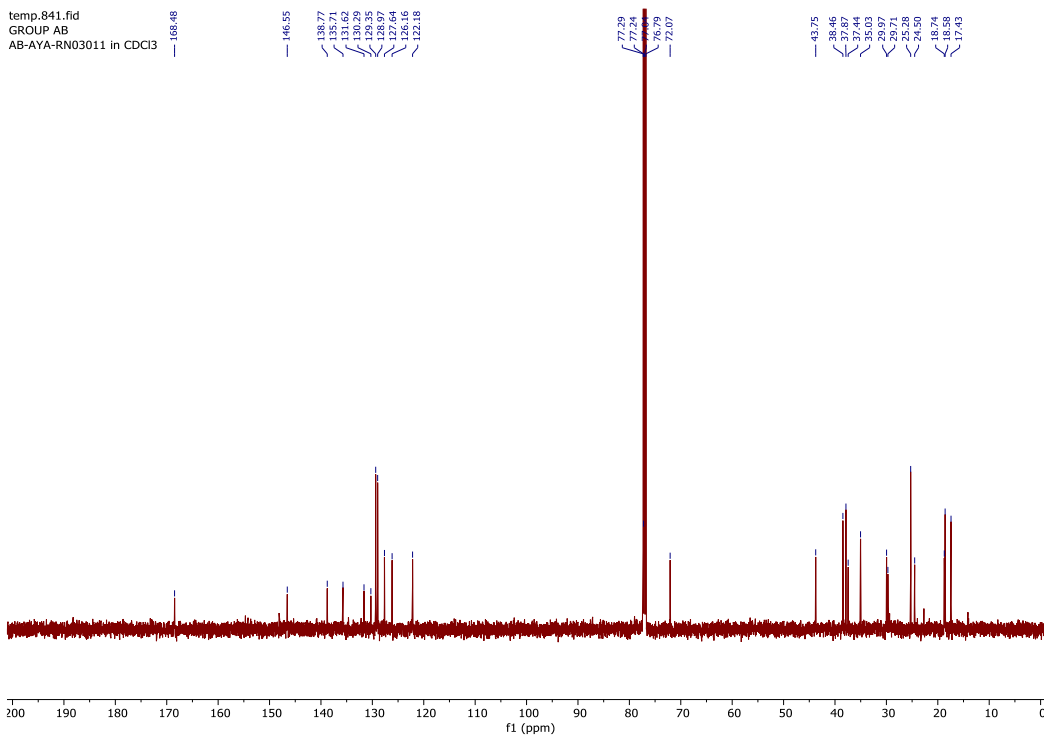

<sup>13</sup>C{<sup>1</sup>H} NMR (125 MHz, CDCl<sub>3</sub>) of (+)-S4

AB02-Apr-2024 13:46:06

AB-MTJ-RN011 (0.053) Is (1.00,1.00) C25H32NO2

IISER - KOLKATA

1: TOF MS ES+  
7.55e12

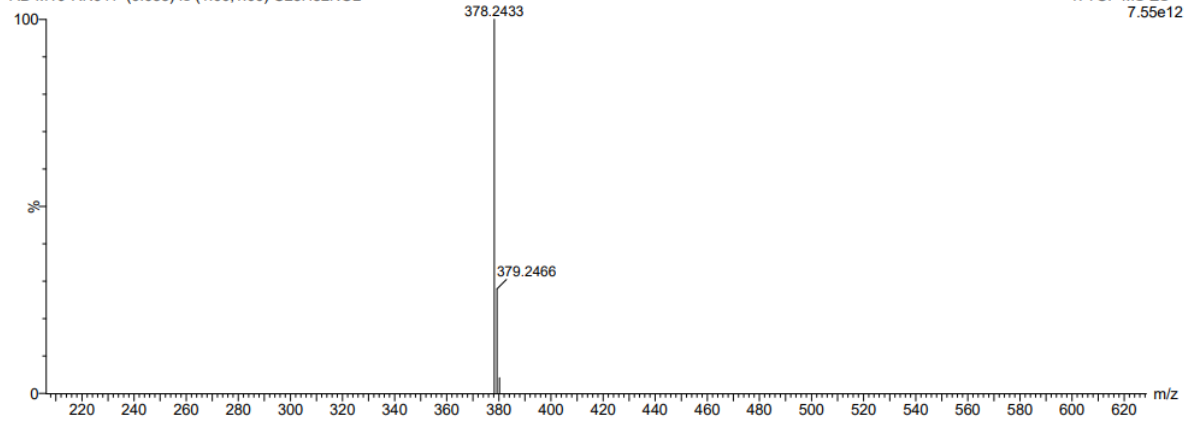

AB-MTJ-RN011 5 (0.121) AM2 (Ar,22000.0,556.28,0.00,LS 10); ABS

1: TOF MS ES+  
7.17e6

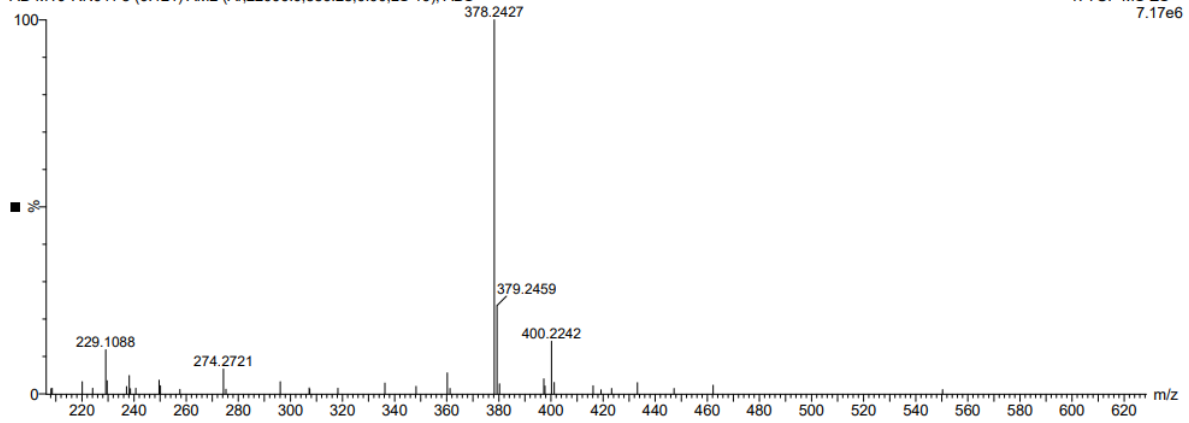

HRMS data of (+)-S4

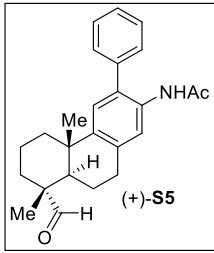

temp.650.fid  
GROUP AB  
AB-AYA-RN03043R in CDCl<sub>3</sub>

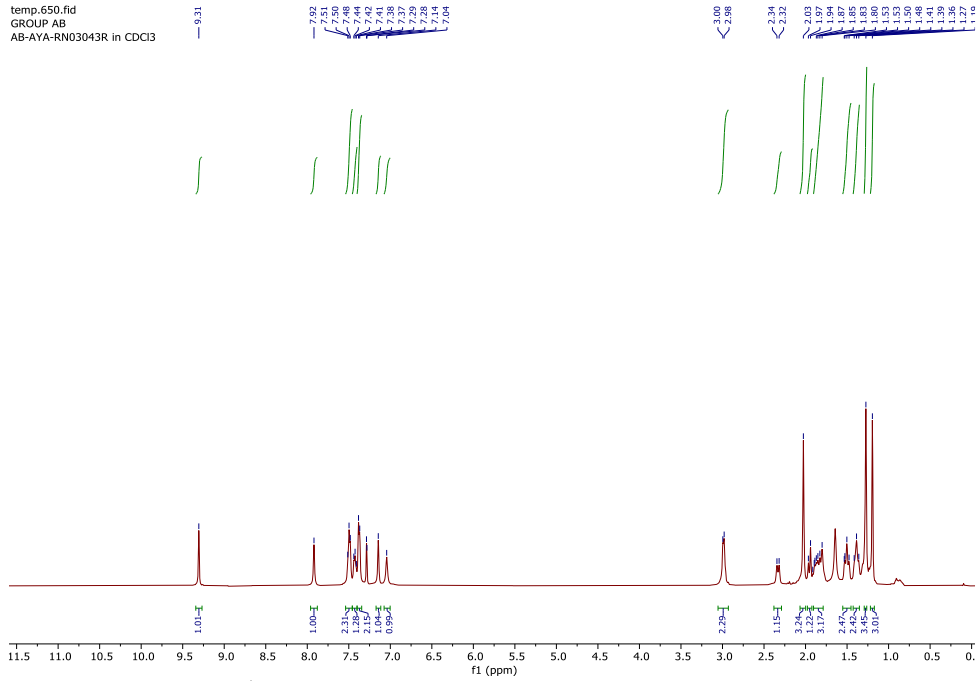

<sup>1</sup>H NMR (500 MHz, CDCl<sub>3</sub>) of (+)-S5

temp.651.fid  
GROUP AB  
AB-AYA-RN03043R in CDCl<sub>3</sub>

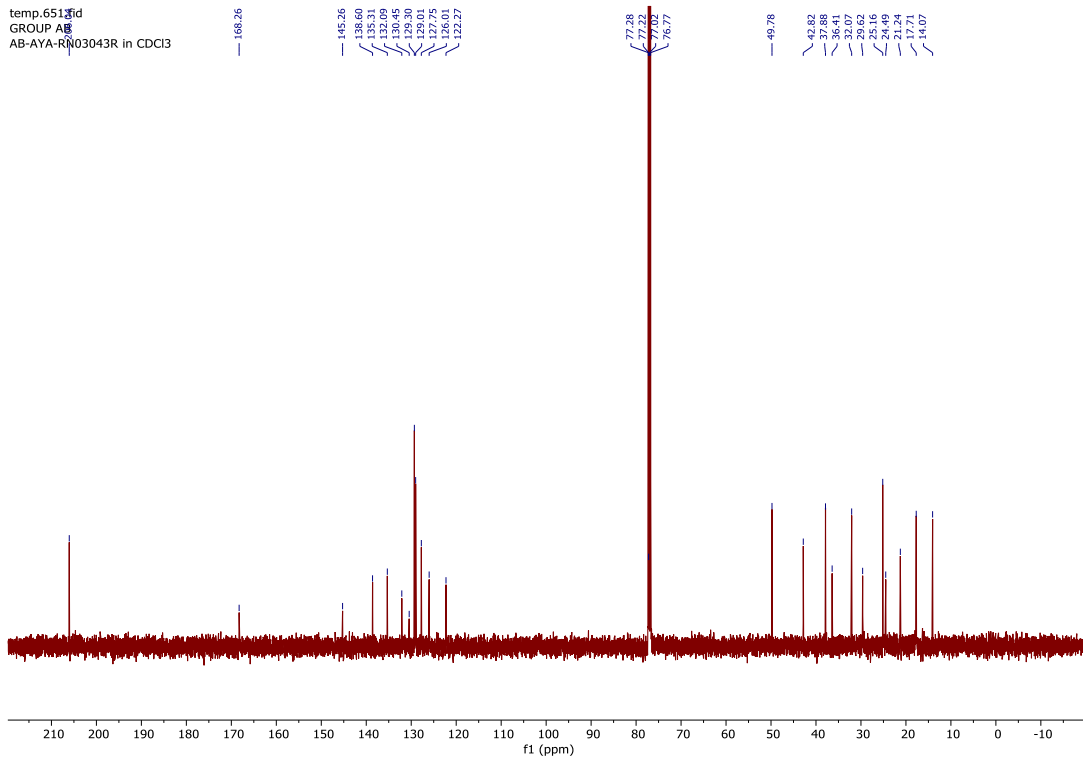

<sup>13</sup>C{<sup>1</sup>H} NMR (125 MHz, CDCl<sub>3</sub>) of (+)-S5



# Display Report

## Analysis Info

Analysis Name D:\Data\User data\2022\MAR\AB\_RN\_03033.d  
Method Tune\_pos\_Standard.m  
Sample Name AB\_RN\_03033  
Comment

Acquisition Date 3/31/2022 12:57:46 PM

Operator IISER Kolkata  
Instrument maXis impact 8282001.00127

## Acquisition Parameter

|             |          |                      |          |                  |           |
|-------------|----------|----------------------|----------|------------------|-----------|
| Source Type | ESI      | Ion Polarity         | Positive | Set Nebulizer    | 0.5 Bar   |
| Focus       | Active   | Set Capillary        | 3400 V   | Set Dry Heater   | 200 °C    |
| Scan Begin  | 50 m/z   | Set End Plate Offset | -500 V   | Set Dry Gas      | 4.0 l/min |
| Scan End    | 1000 m/z | Set Charging Voltage | 2000 V   | Set Divert Valve | Source    |
|             |          | Set Corona           | 0 nA     | Set APCI Heater  | 0 °C      |

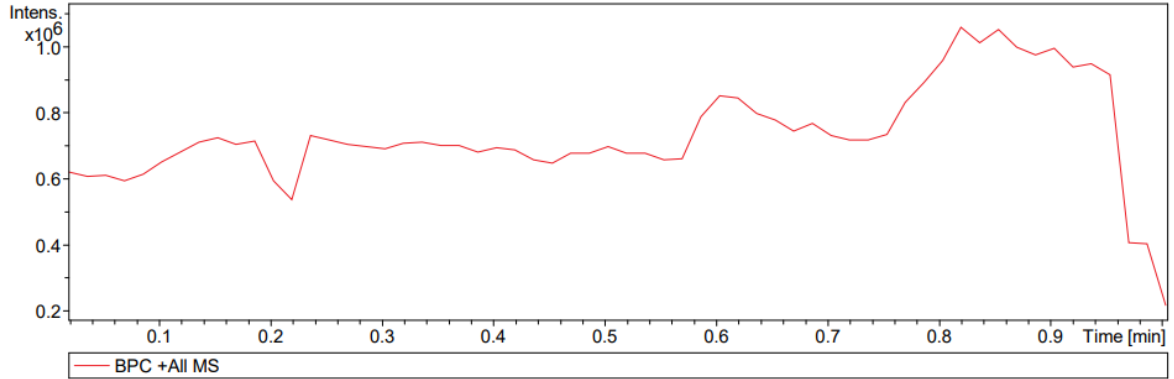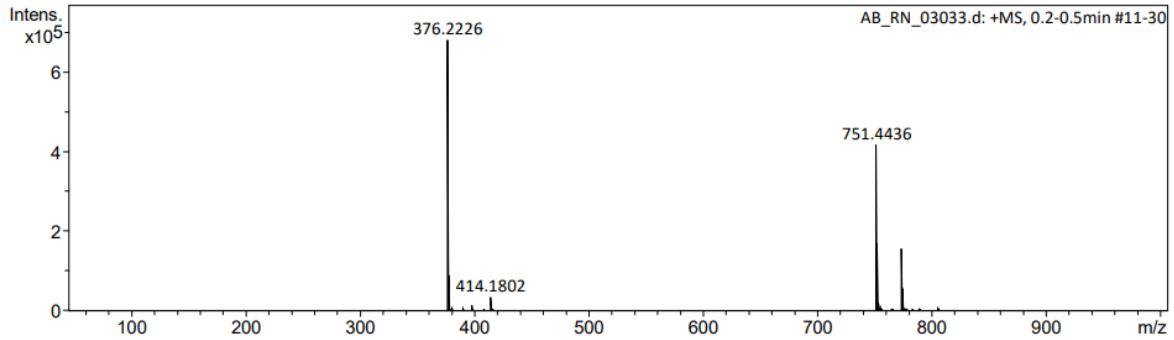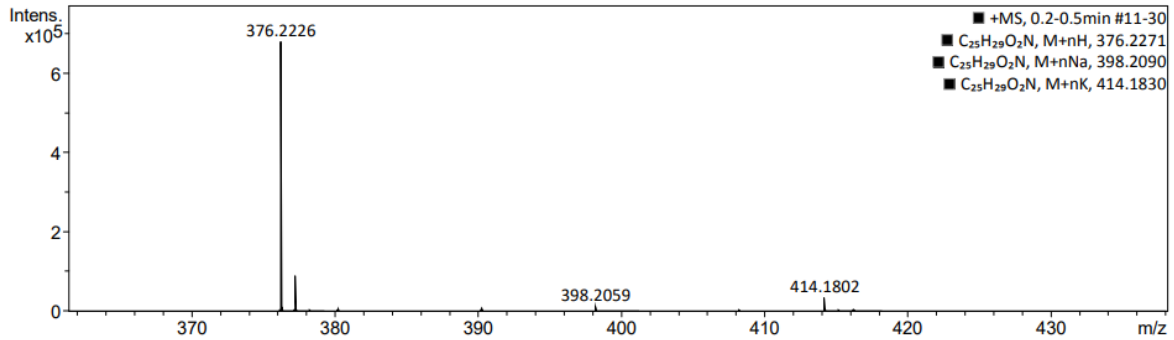

AB\_RN\_03033.d

Bruker Compass DataAnalysis 4.1

printed: 3/31/2022 1:01:12 PM

by: IISER Kolkata

Page 1 of 1

HRMS data of (+)-S5

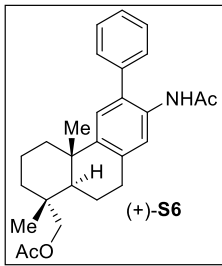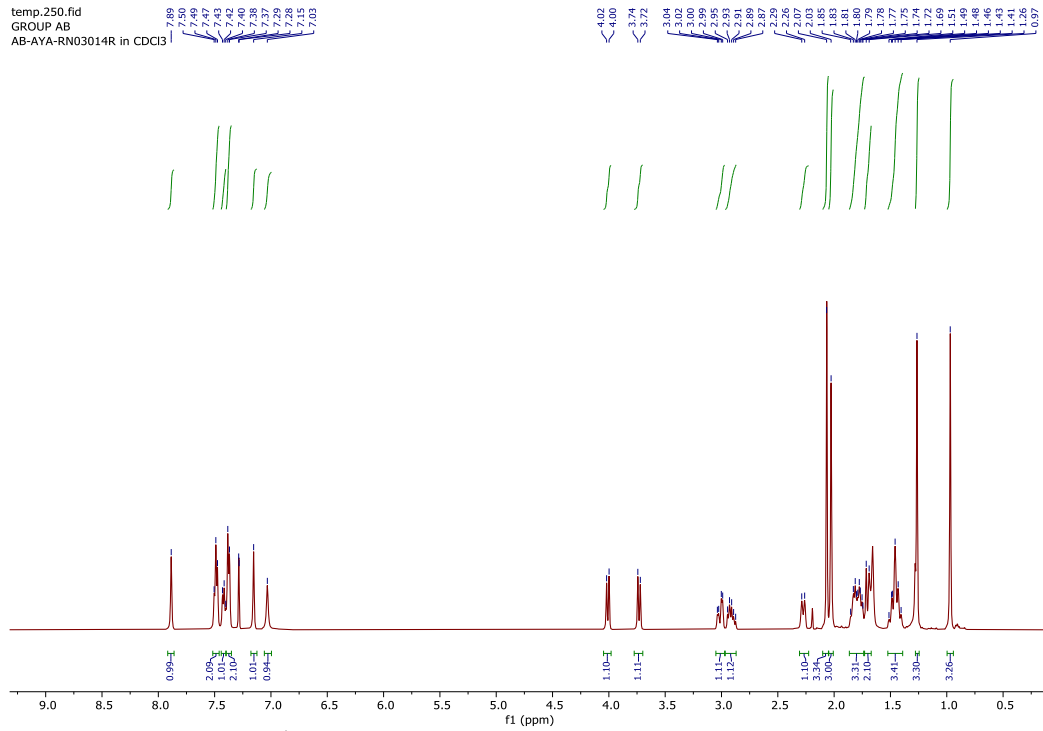

<sup>1</sup>H NMR (500 MHz, CDCl<sub>3</sub>) of (+)-S6

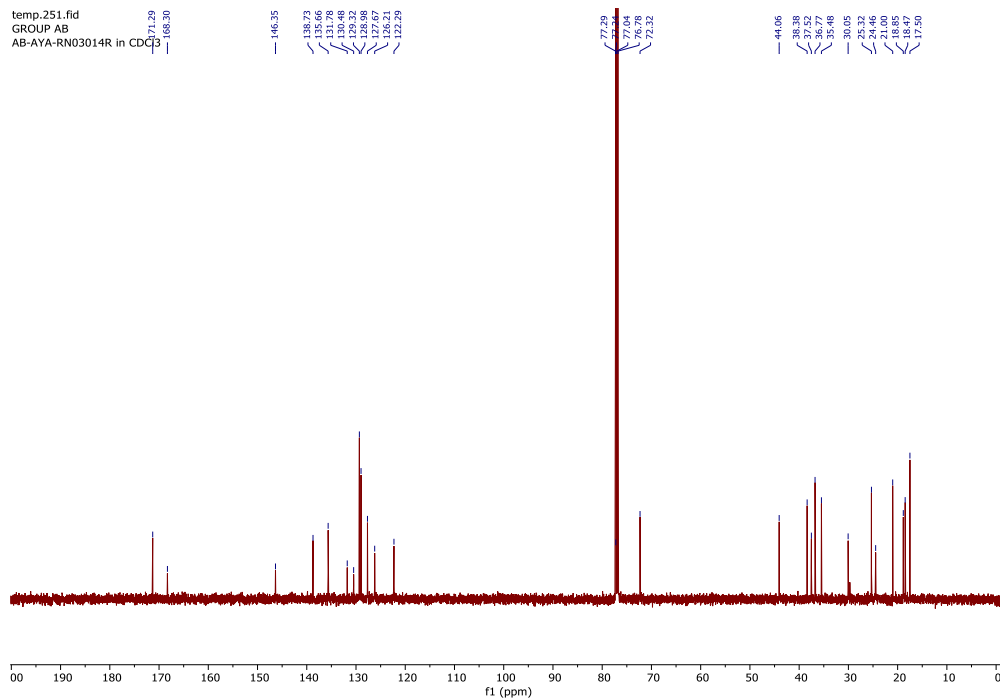

<sup>13</sup>C{<sup>1</sup>H} NMR (125 MHz, CDCl<sub>3</sub>) of (+)-S6

# Display Report

## Analysis Info

Analysis Name D:\Data\User data\2022\MAY\ab\_rn\_03014r.d  
Method Tune\_pos\_Standard.m  
Sample Name ab\_rn\_03014r  
Comment

Acquisition Date 5/23/2022 2:19:24 PM

Operator IISER Kolkata  
Instrument maXis impact 8282001.00127

## Acquisition Parameter

|             |          |                      |          |                  |           |
|-------------|----------|----------------------|----------|------------------|-----------|
| Source Type | ESI      | Ion Polarity         | Positive | Set Nebulizer    | 0.5 Bar   |
| Focus       | Active   | Set Capillary        | 3400 V   | Set Dry Heater   | 200 °C    |
| Scan Begin  | 50 m/z   | Set End Plate Offset | -500 V   | Set Dry Gas      | 4.0 l/min |
| Scan End    | 1000 m/z | Set Charging Voltage | 2000 V   | Set Divert Valve | Source    |
|             |          | Set Corona           | 0 nA     | Set APCI Heater  | 0 °C      |

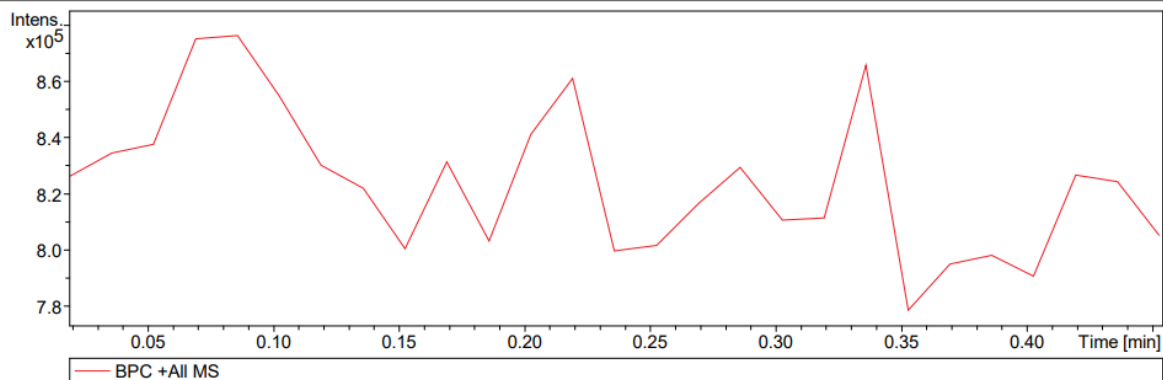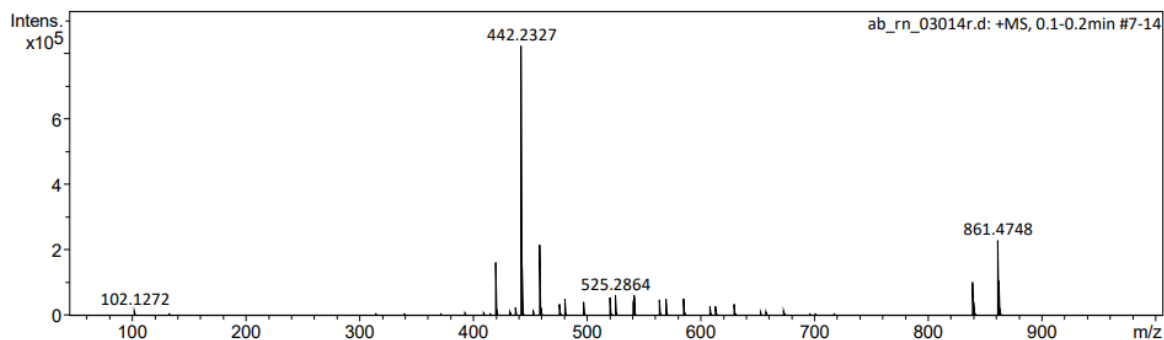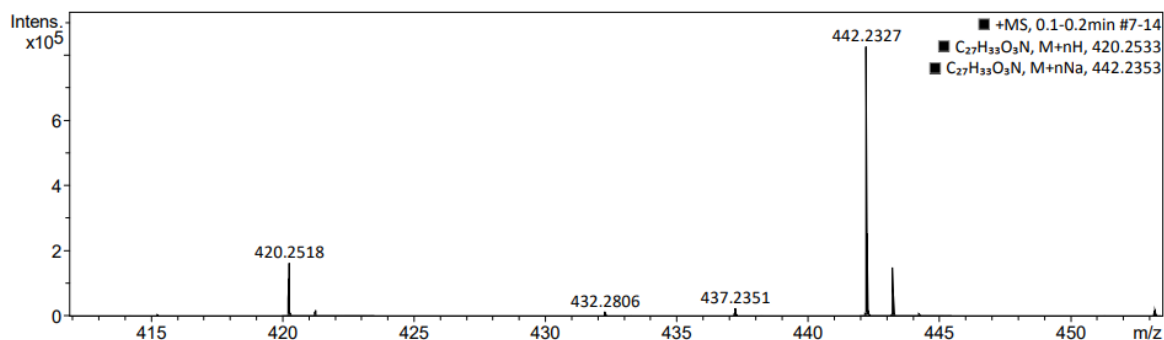

ab\_rn\_03014r.d

Bruker Compass DataAnalysis 4.1

printed: 5/23/2022 2:20:44 PM

by: IISER Kolkata

Page 1 of 1

HRMS data of (+)-S6



SK02-Apr-2024 13:49:14  
SK-SSK-RN037R (0.053) Is (1.00,1.00) C<sub>25</sub>H<sub>30</sub>NO<sub>3</sub>

IISER - KOLKATA

1: TOF MS ES+  
7.53e12

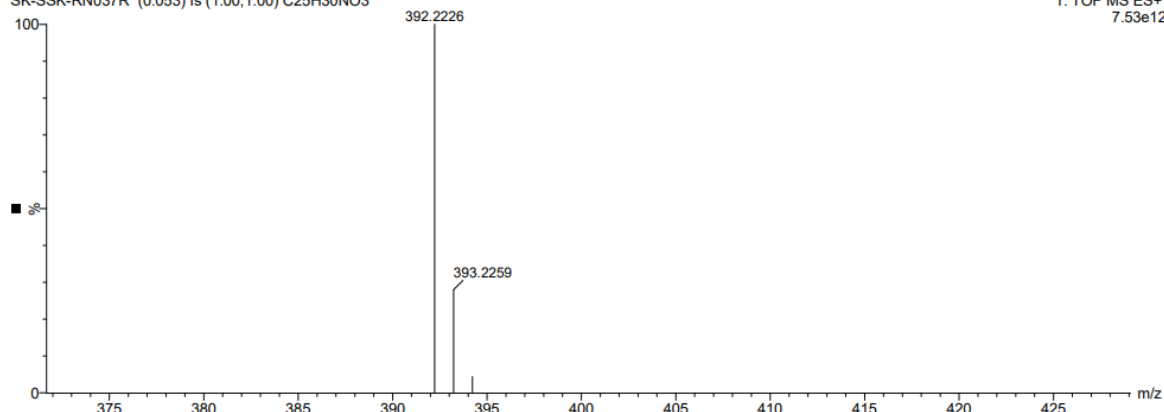

SK-SSK-RN037R 3 (0.087) AM2 (Ar,22000.0,556.28,0.00,LS 10); ABS

1: TOF MS ES+  
9.18e5

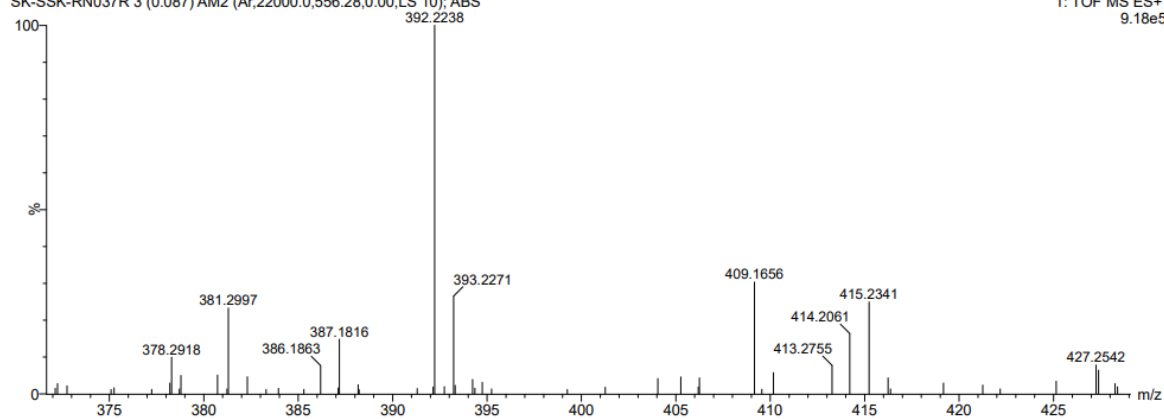

HRMS data of (+)-S7

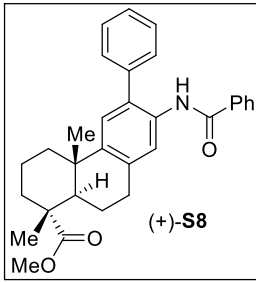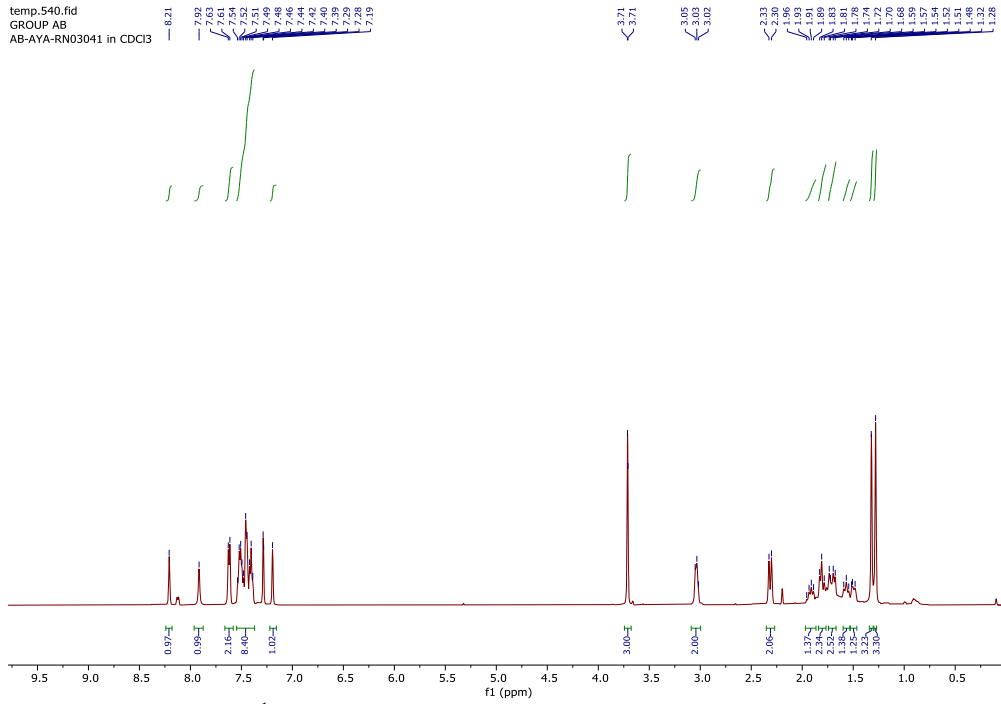

<sup>1</sup>H NMR (500 MHz, CDCl<sub>3</sub>) of (+)-S8

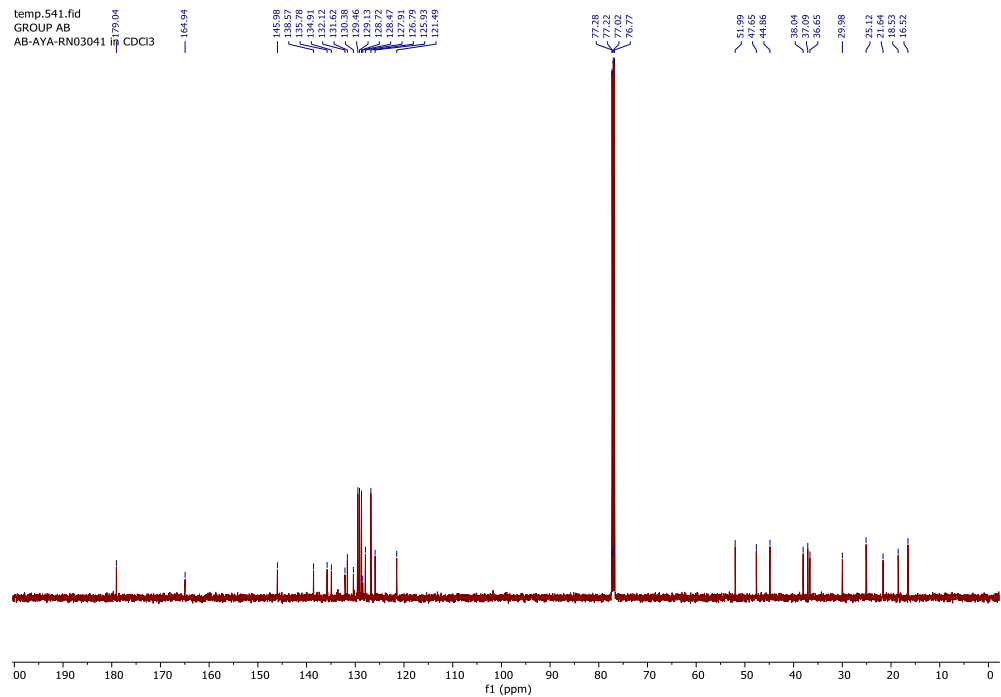

<sup>13</sup>C{<sup>1</sup>H} NMR (125 MHz, CDCl<sub>3</sub>) of (+)-S8

AB18-Apr-2024 13:36:36  
AB-SOV-02011 (0.053) Is (1.00,1.00) C31H34NO3

IISER - KOLKATA

1: TOF MS ES+  
7.06e12

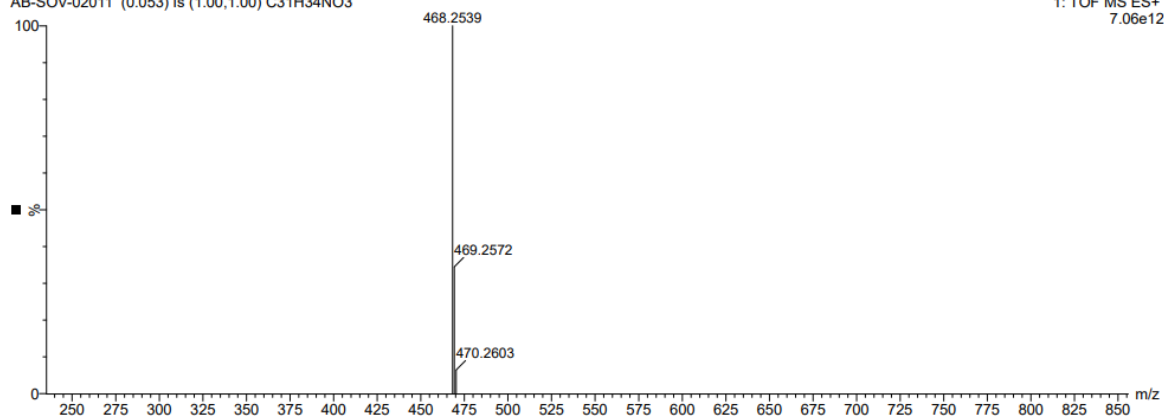

AB-SOV-02011 7 (0.155) AM2 (Ar,22000.0,556.28,0.00,LS 10); ABS

1: TOF MS ES+  
5.90e6

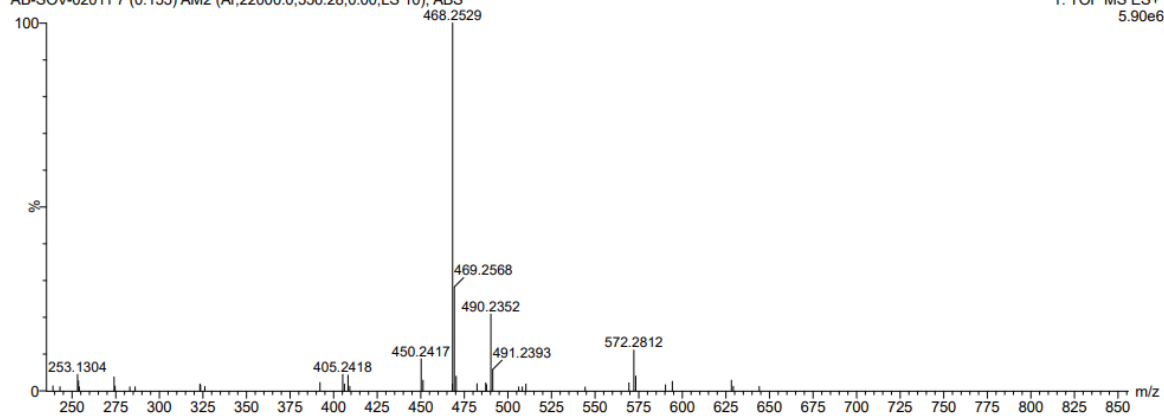

HRMS data of (+)-**S8**

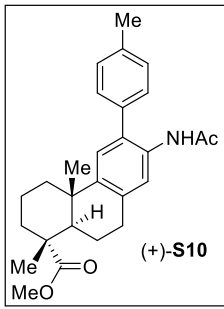

temp.470.fid  
GROUP AB  
AB-AYA-RN0389 in CDCl<sub>3</sub>

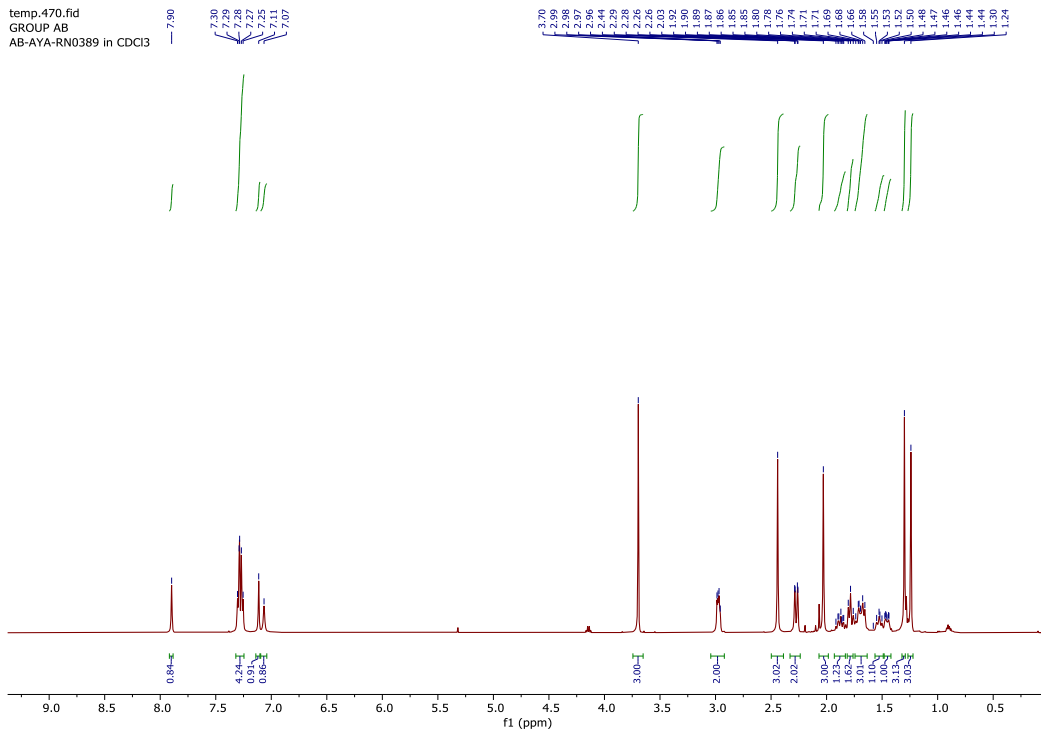

<sup>1</sup>H NMR (500 MHz, CDCl<sub>3</sub>) of (+)-S10

temp.471.fid  
GROUP AB  
AB-AYA-RN0389 in CDCl<sub>3</sub>

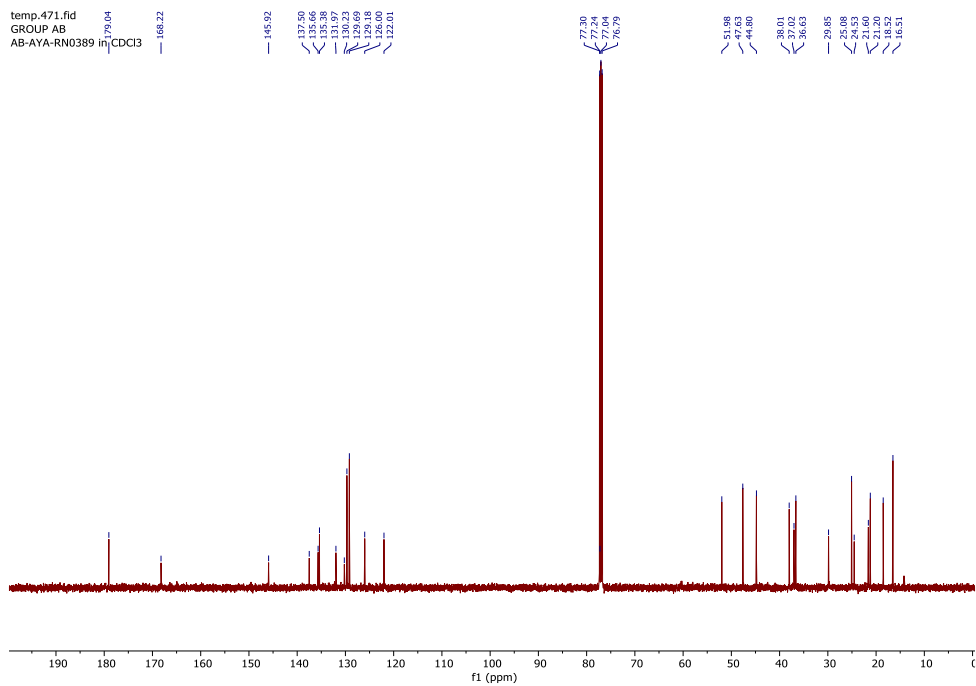

<sup>13</sup>C{<sup>1</sup>H} NMR (125 MHz, CDCl<sub>3</sub>) of (+)-S10



# Display Report

## Analysis Info

Analysis Name D:\Data\User data\2022\MAR\AB\_RN\_0389.d  
Method Tune\_pos\_Standard.m  
Sample Name AB\_RN\_0389  
Comment signal dropping issue

Acquisition Date 3/16/2022 6:39:06 PM

Operator IISER Kolkata  
Instrument maXis impact 8282001.00127

## Acquisition Parameter

|             |          |                      |          |                  |           |
|-------------|----------|----------------------|----------|------------------|-----------|
| Source Type | ESI      | Ion Polarity         | Positive | Set Nebulizer    | 0.5 Bar   |
| Focus       | Active   | Set Capillary        | 3400 V   | Set Dry Heater   | 200 °C    |
| Scan Begin  | 50 m/z   | Set End Plate Offset | -500 V   | Set Dry Gas      | 4.0 l/min |
| Scan End    | 1000 m/z | Set Charging Voltage | 2000 V   | Set Divert Valve | Source    |
|             |          | Set Corona           | 0 nA     | Set APCI Heater  | 0 °C      |

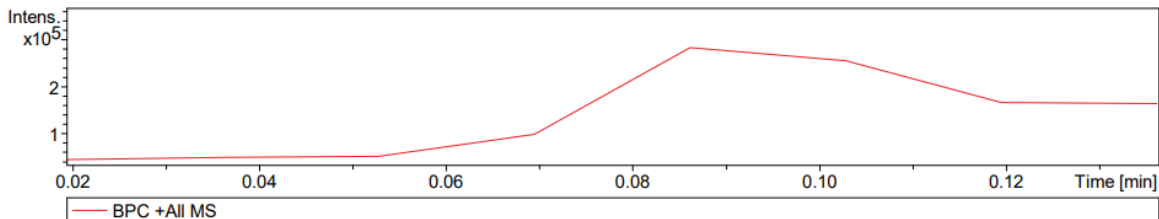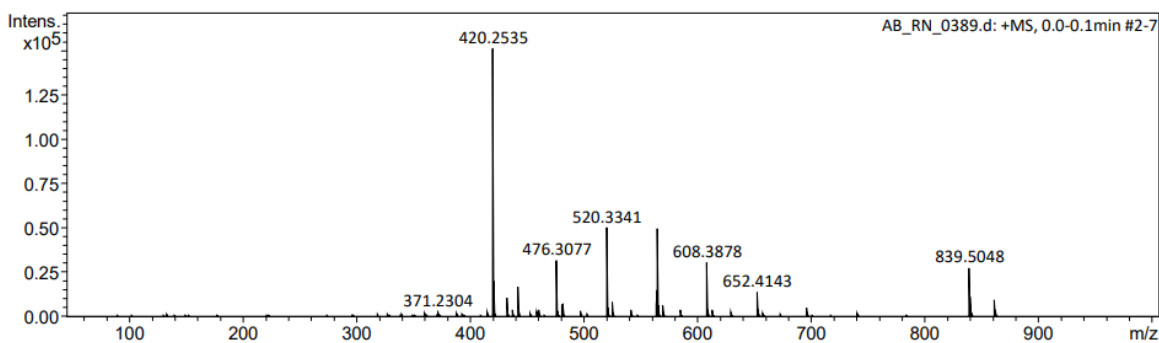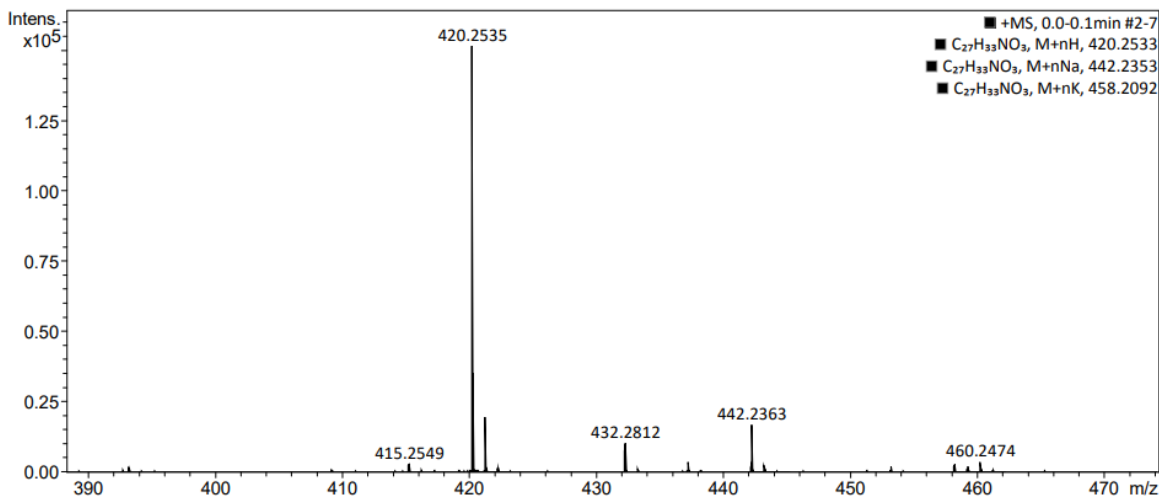

AB\_RN\_0389.d

Bruker Compass DataAnalysis 4.1

printed: 3/16/2022 6:42:41 PM

by: IISER Kolkata

Page 1 of 1

HRMS data of (+)-S10

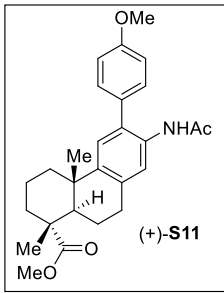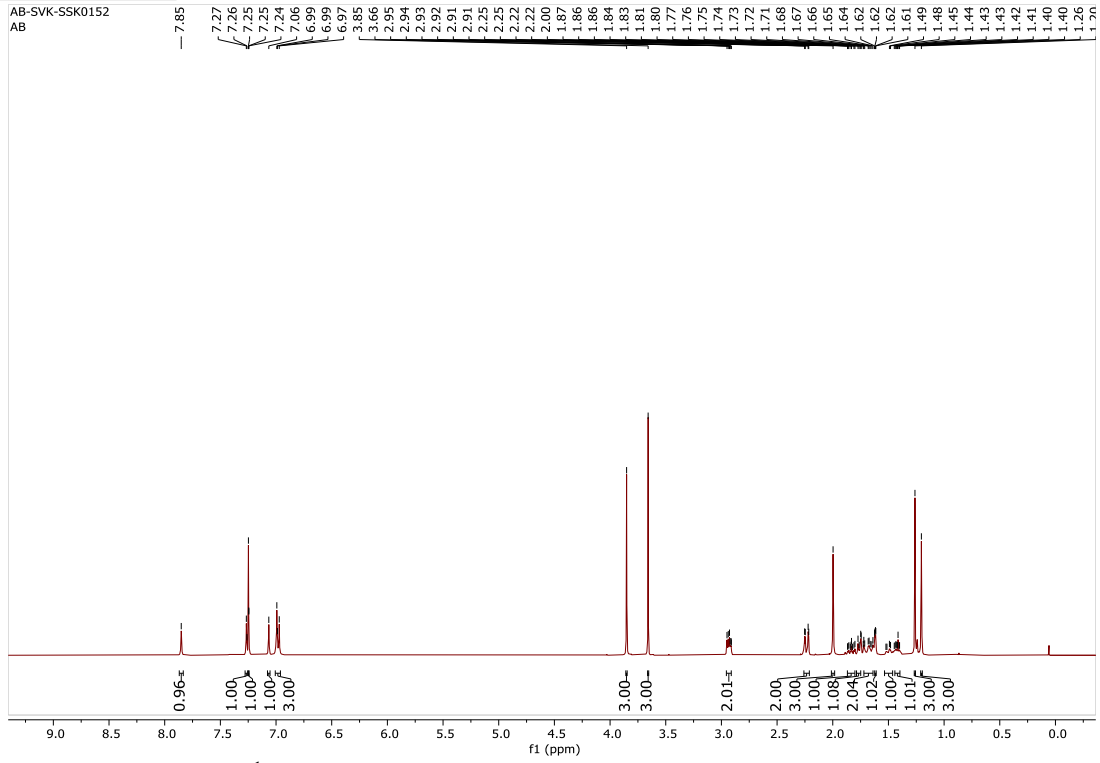

$^1\text{H}$  NMR (400 MHz,  $\text{CDCl}_3$ ) of compound (+)-S11

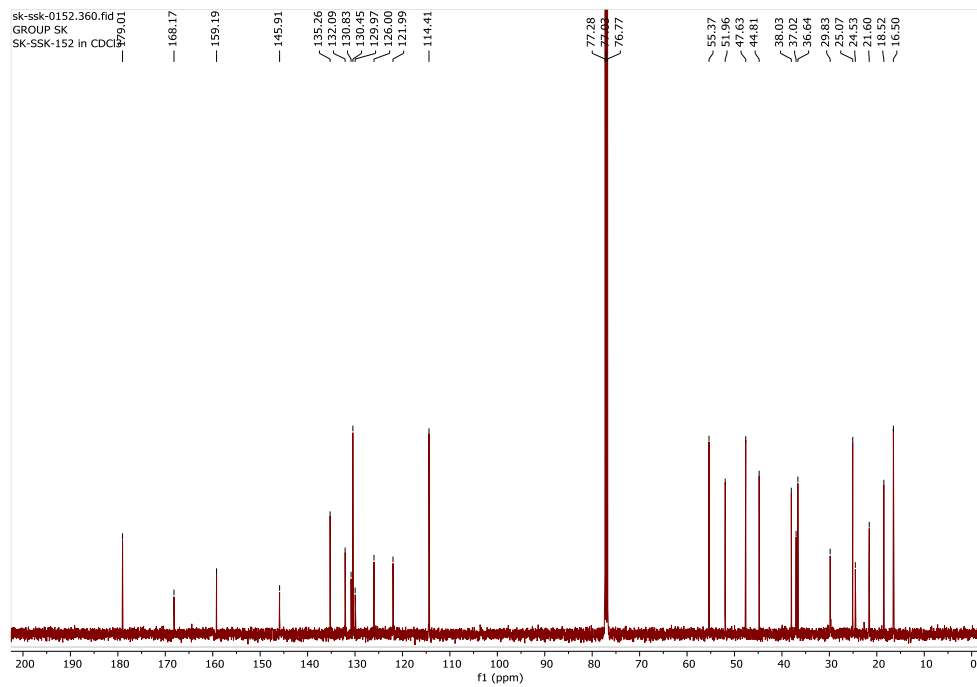

$^{13}\text{C}\{^1\text{H}\}$  NMR (125 MHz,  $\text{CDCl}_3$ ) of compound (+)-S11

# Display Report

## Analysis Info

Analysis Name D:\Data\User data\2022\APRIL\ab\_m\_03054.d  
Method Tune\_pos\_Standard.m  
Sample Name ab\_m\_03054  
Comment

Acquisition Date 4/13/2022 3:04:06 PM  
Operator IISER Kolkata  
Instrument maXis impact 8282001.00127

## Acquisition Parameter

|             |          |                      |          |                  |           |
|-------------|----------|----------------------|----------|------------------|-----------|
| Source Type | ESI      | Ion Polarity         | Positive | Set Nebulizer    | 0.5 Bar   |
| Focus       | Active   | Set Capillary        | 3400 V   | Set Dry Heater   | 200 °C    |
| Scan Begin  | 50 m/z   | Set End Plate Offset | -500 V   | Set Dry Gas      | 4.0 l/min |
| Scan End    | 1000 m/z | Set Charging Voltage | 2000 V   | Set Divert Valve | Source    |
|             |          | Set Corona           | 0 nA     | Set APCI Heater  | 0 °C      |

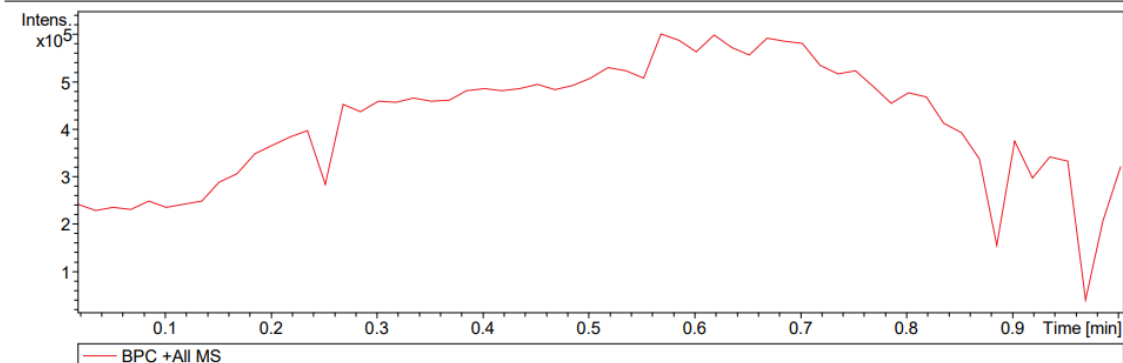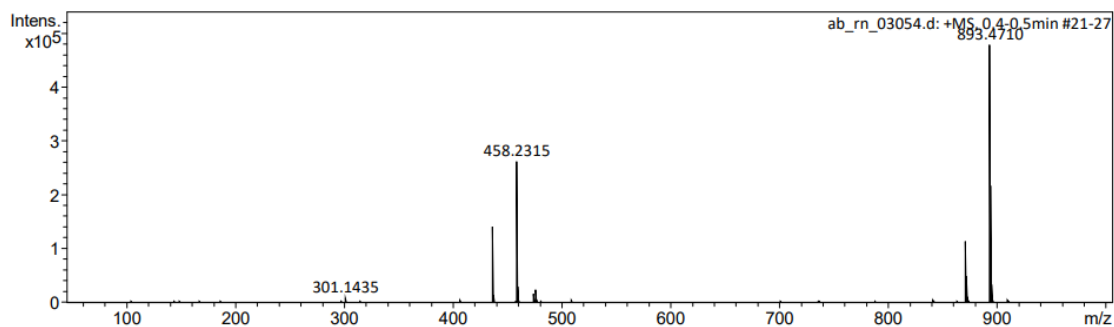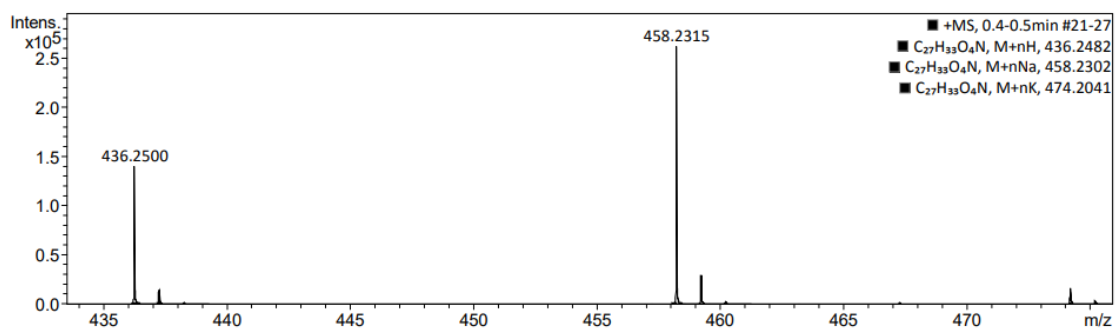

ab\_m\_03054.d

Bruker Compass DataAnalysis 4.1

printed: 4/13/2022 3:07:05 PM

by: IISER Kolkata

Page 1 of 1

HRMS data of (+)-S11

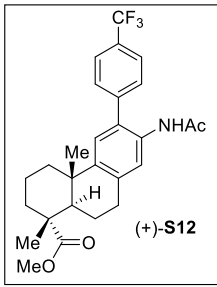

temp.120.fid  
GROUP SAB  
AB-AYA-RN03032 in CDCl<sub>3</sub>

7.74  
7.72  
7.51  
7.49  
7.12  
6.89

3.93  
3.79  
2.98  
2.97  
2.96  
2.29  
2.28  
2.27  
2.26  
2.25  
2.24  
2.04  
1.92  
1.90  
1.89  
1.88  
1.87  
1.86  
1.85  
1.84  
1.83  
1.80  
1.79  
1.78  
1.77  
1.76  
1.69  
1.67  
1.66  
1.55  
1.54  
1.53  
1.52  
1.51  
1.50  
1.49  
1.48  
1.47  
1.46  
1.45  
1.44  
1.43  
1.42  
1.24

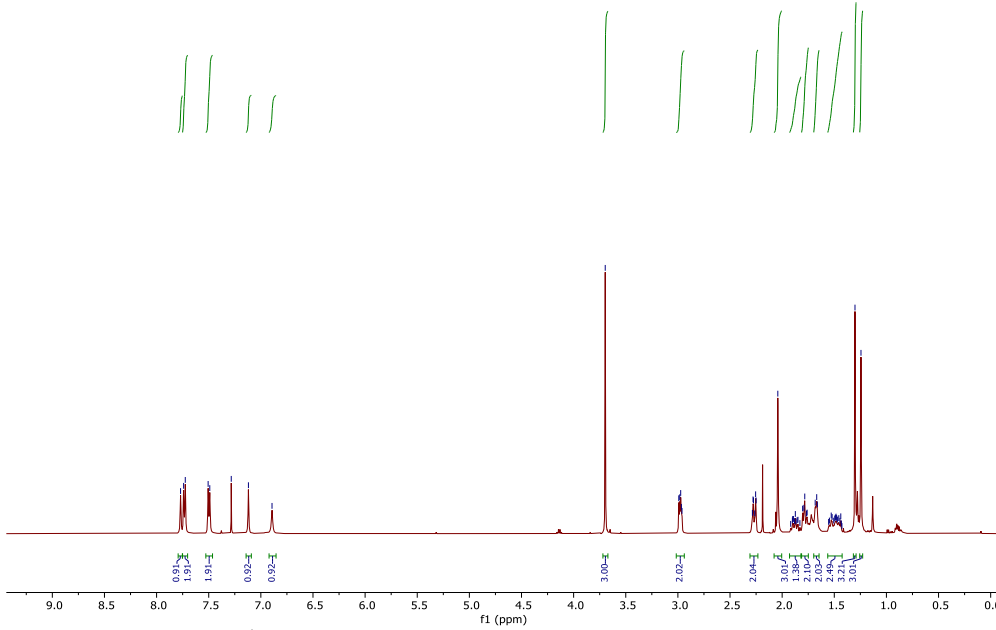

<sup>1</sup>H NMR (500 MHz, CDCl<sub>3</sub>) of (+)-S12

temp.121.fid  
GROUP SAB  
AB-AYA-RN03032 in CDCl<sub>3</sub>

168.47  
146.78  
142.67  
136.51  
129.84  
129.66  
128.80  
125.57

77.28  
77.23  
76.77

52.00  
49.38  
44.70  
38.00  
37.08  
36.61  
29.78  
25.09  
21.48  
18.46  
16.49

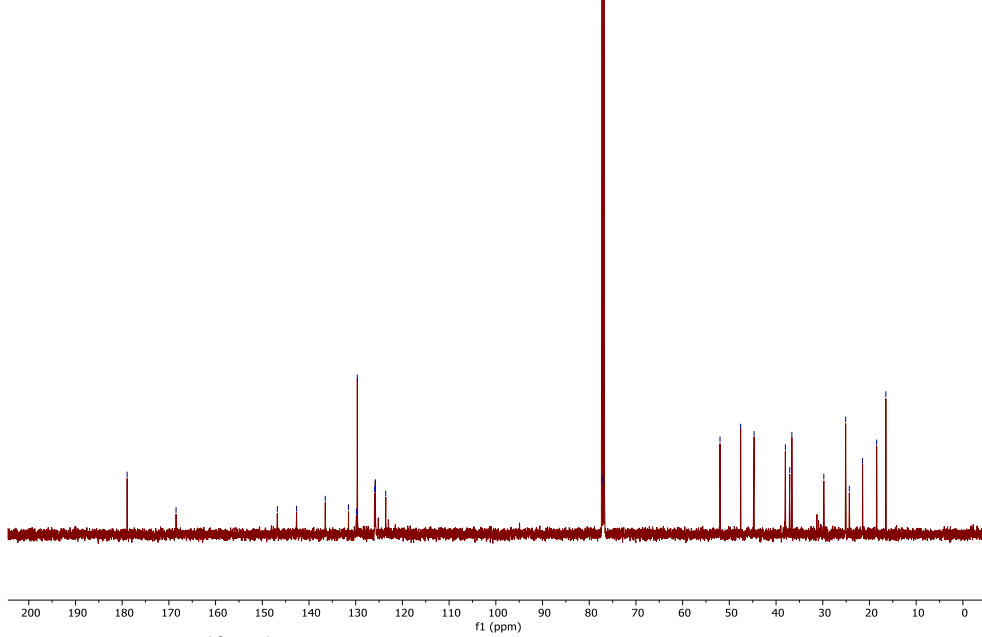

<sup>13</sup>C{<sup>1</sup>H} NMR (125 MHz, CDCl<sub>3</sub>) of (+)-S12

AB-SOV-0208  
1D 19F experiment

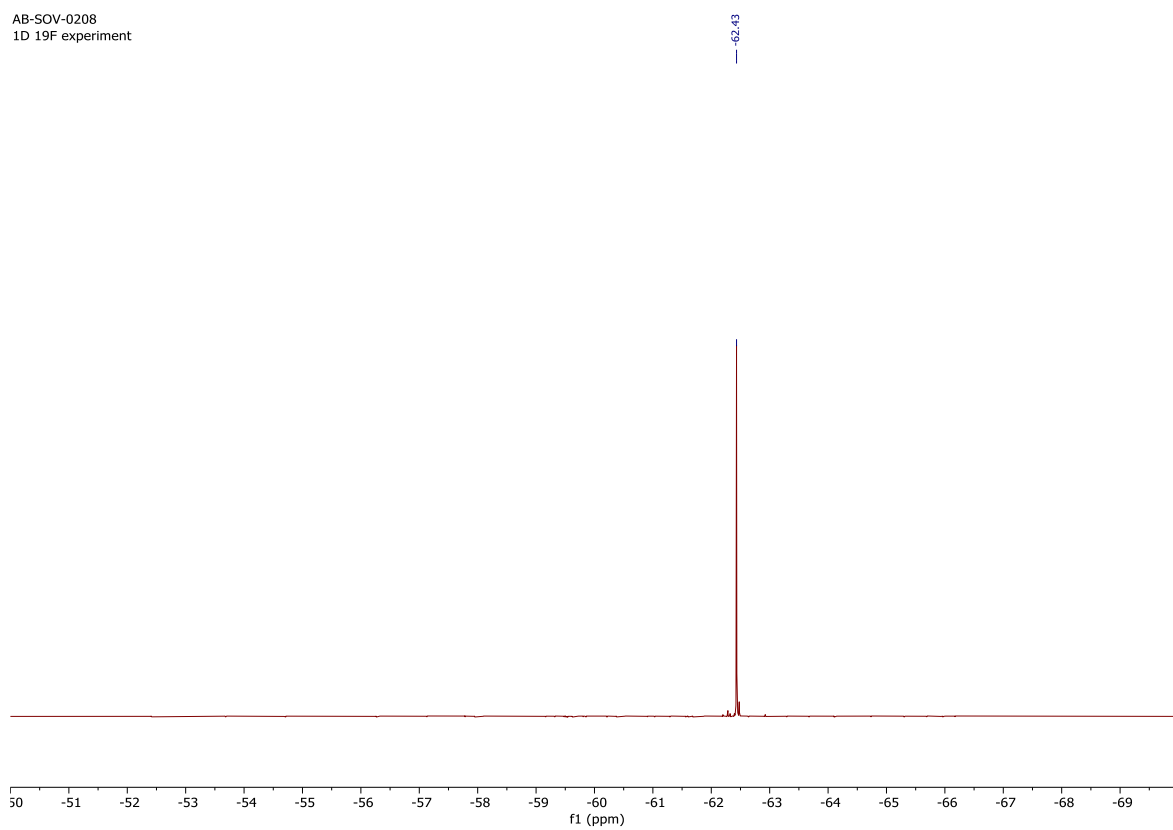

$^{19}\text{F}\{^1\text{H}\}$  NMR (376 MHz,  $\text{CDCl}_3$ ) of (+)-**S12**

AB28-Mar-2024 12:42:39  
AB-SOV-0208 (0.053) Is (1.00,1.00) C27H29F3NO3

IISER - KOLKATA

1: TOF MS ES+  
7.37e12

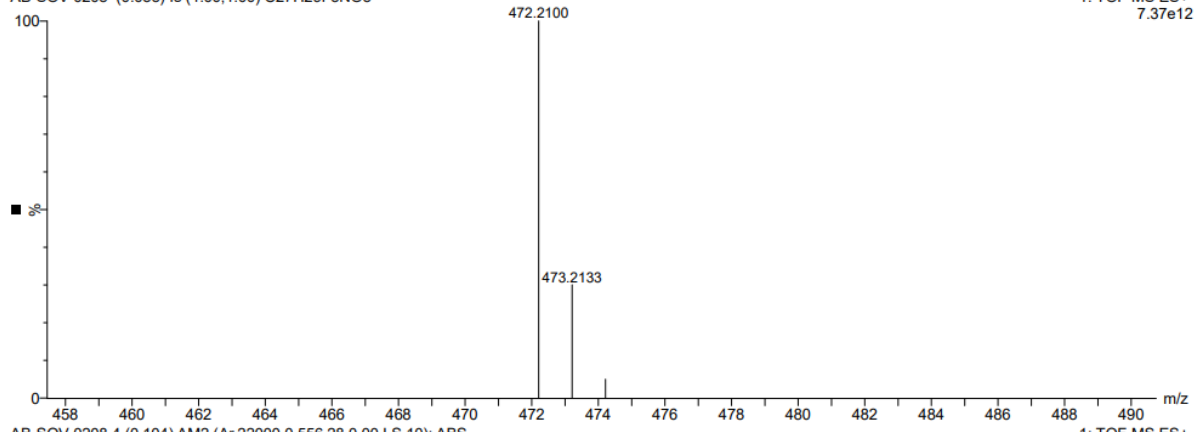

AB-SOV-0208 4 (0.104) AM2 (Ar,22000.0,556.28,0.00,LS 10); ABS

1: TOF MS ES+  
5.71e6

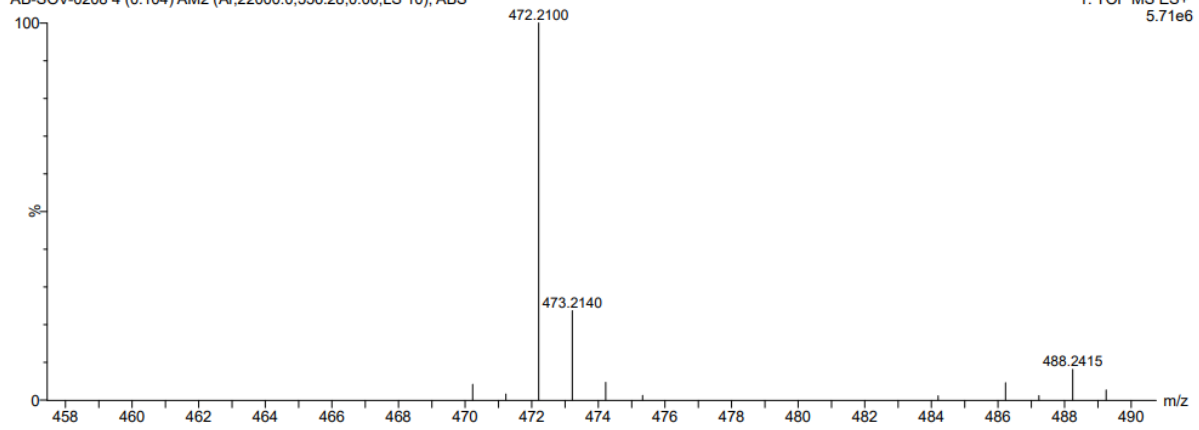

HRMS data of (+)-S12

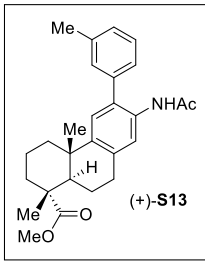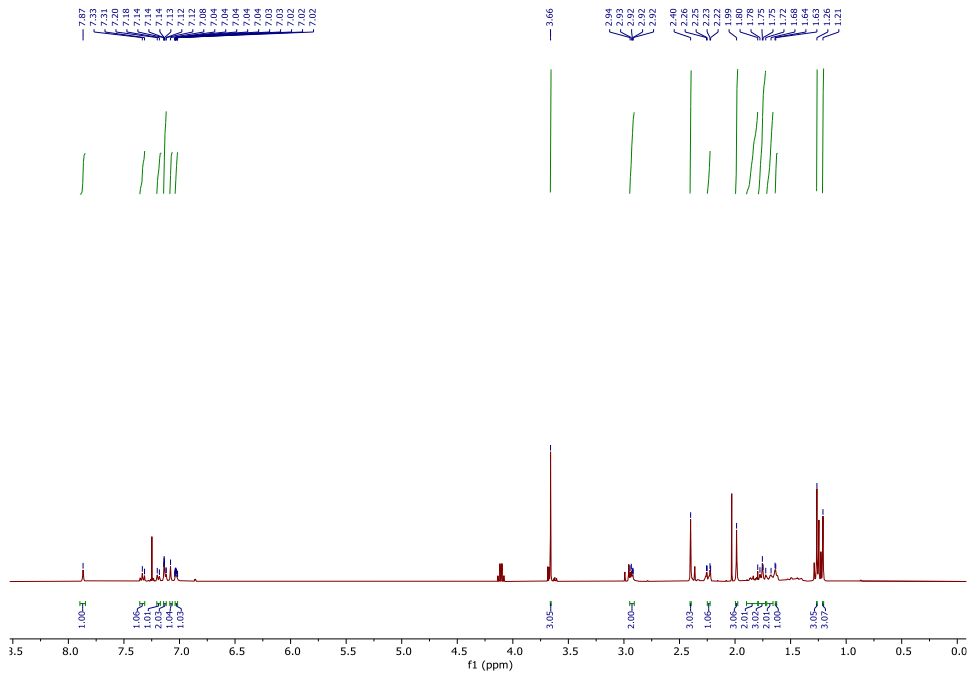

**<sup>1</sup>H NMR (400 MHz, CDCl<sub>3</sub>) Data of (+)-S13**

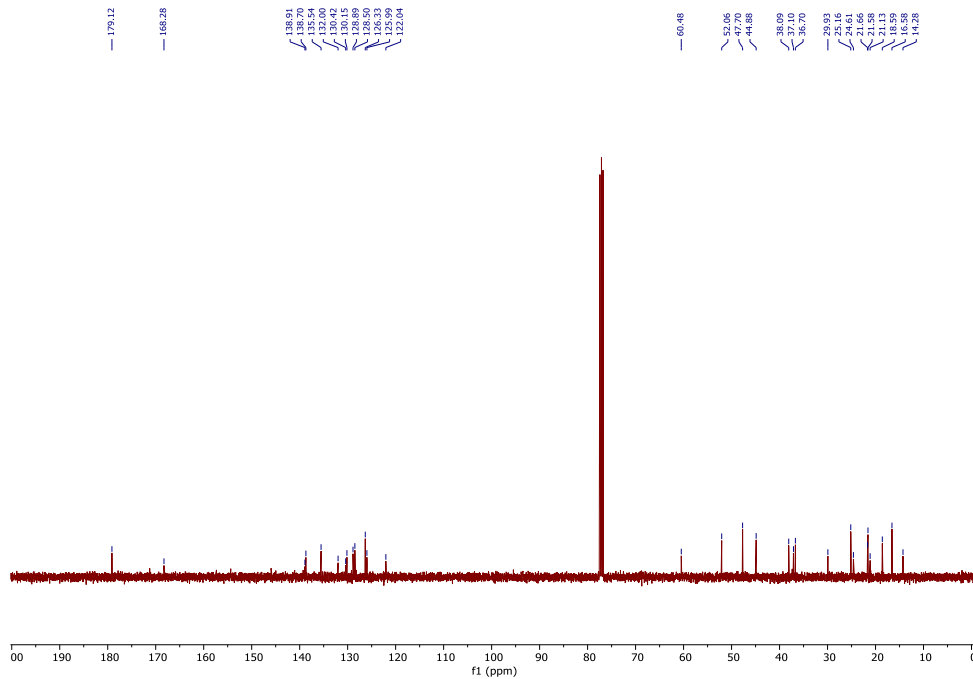

**<sup>13</sup>C {<sup>1</sup>H} NMR (101 MHz, CDCl<sub>3</sub>) Data of (+)-S13**

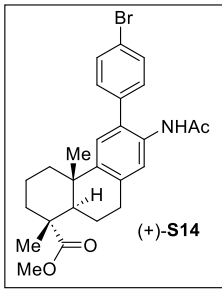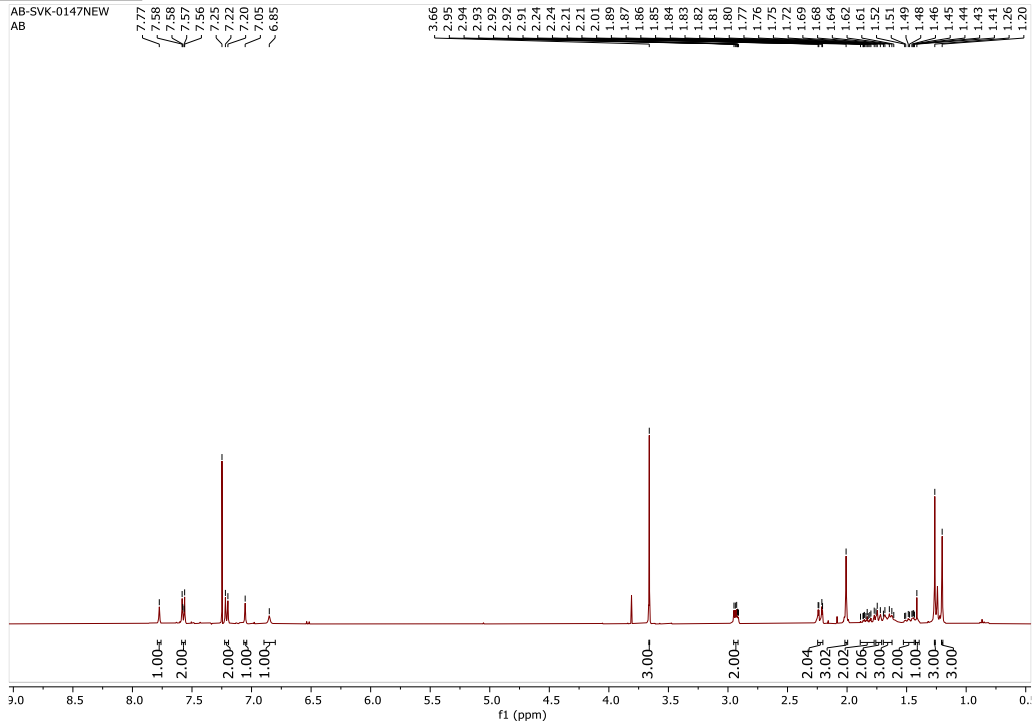

<sup>1</sup>H NMR (400 MHz, CDCl<sub>3</sub>) of compound (+)-S14

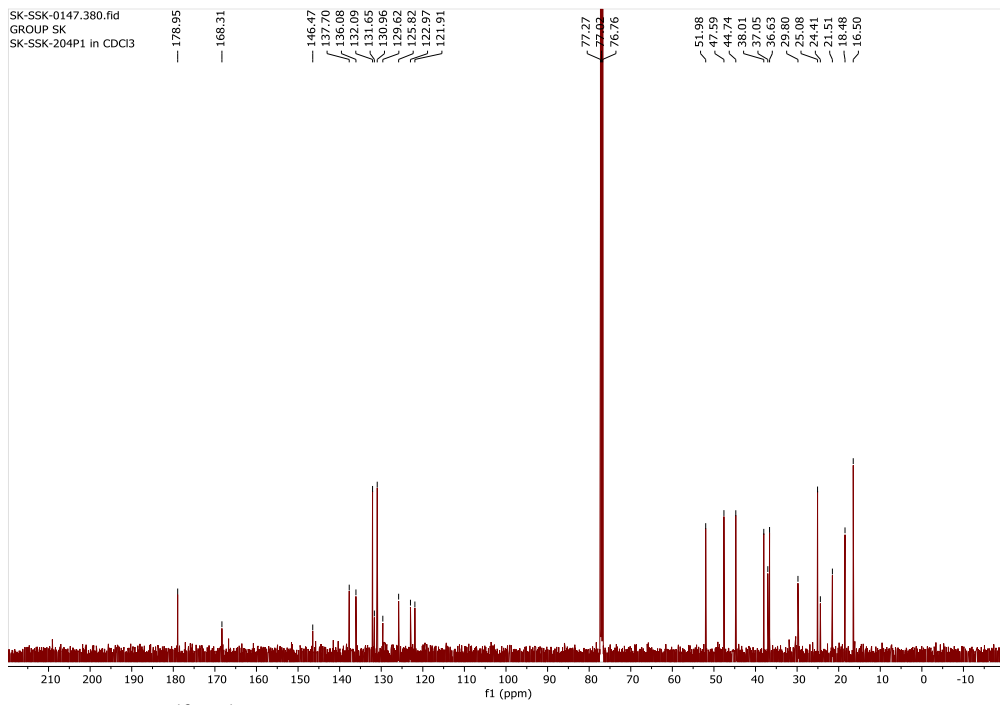

<sup>13</sup>C NMR (125 MHz, CDCl<sub>3</sub>) of compound (+)-S14



AB29-Apr-2024 16:17:34  
AB-AYA-02278P (0.104) Is (1.00,1.00) C<sub>26</sub>H<sub>31</sub>BrNO<sub>3</sub>

IISER - KOLKATA

1: TOF MS ES+  
3.85e12

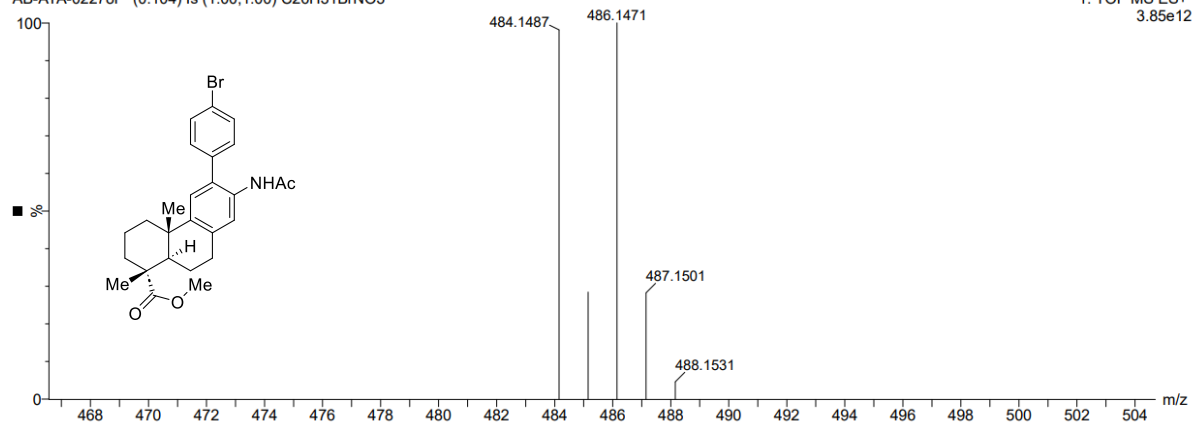

AB-AYA-02278P 4 (0.104)

1: TOF MS ES+  
7.77e6

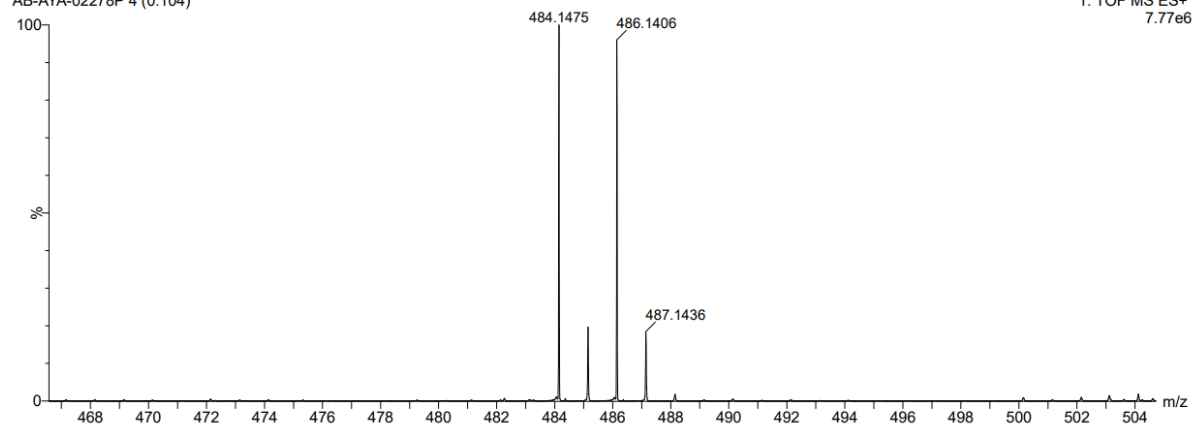

HRMS Data of (+)-S14

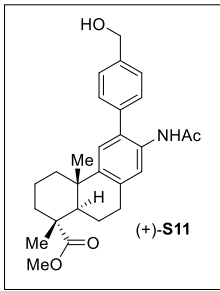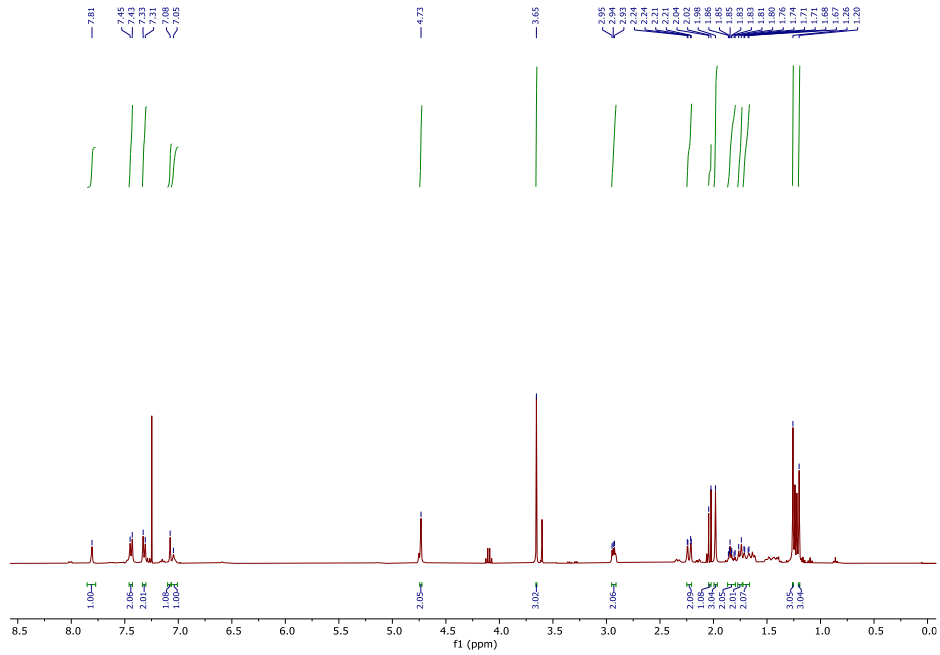

**<sup>1</sup>H NMR (400 MHz, CDCl<sub>3</sub>) Data of (+)-S15**

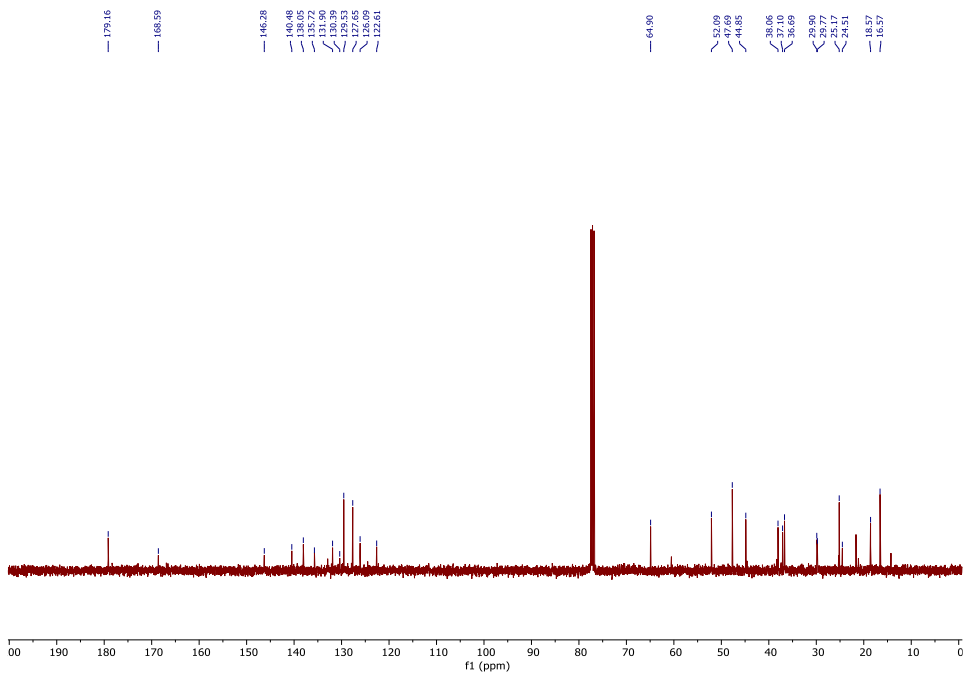

**<sup>13</sup>C {<sup>1</sup>H} NMR (101 MHz, CDCl<sub>3</sub>) Data of (+)-S15**

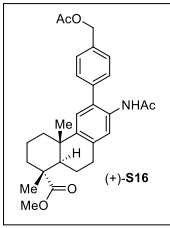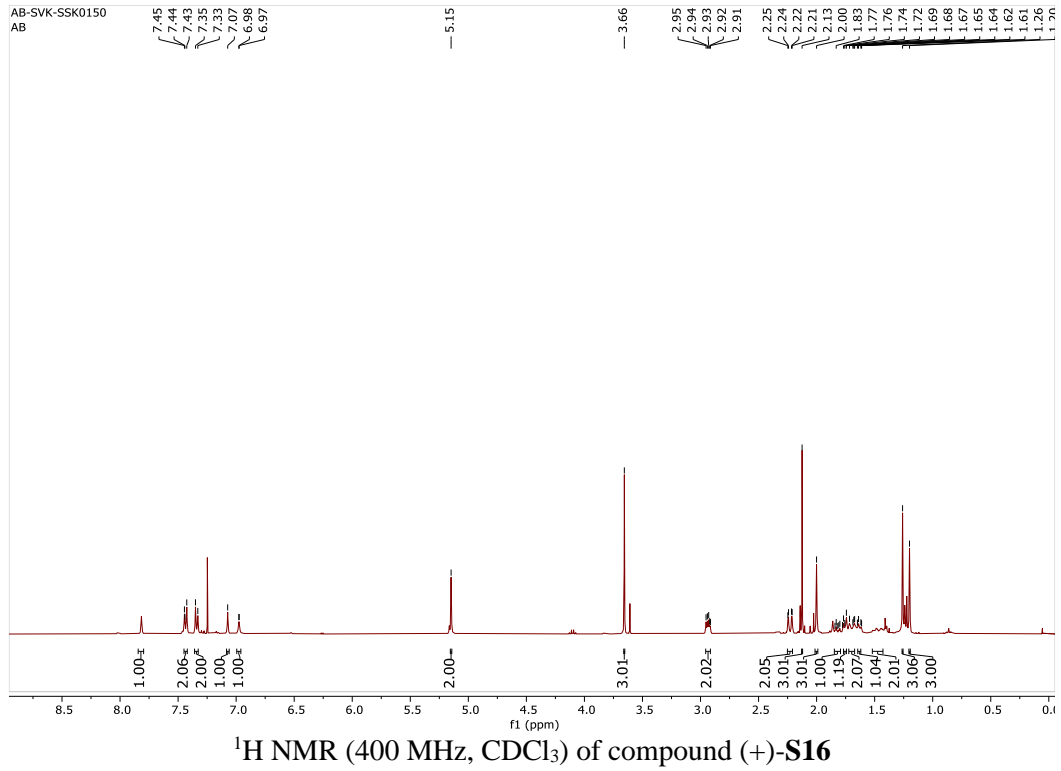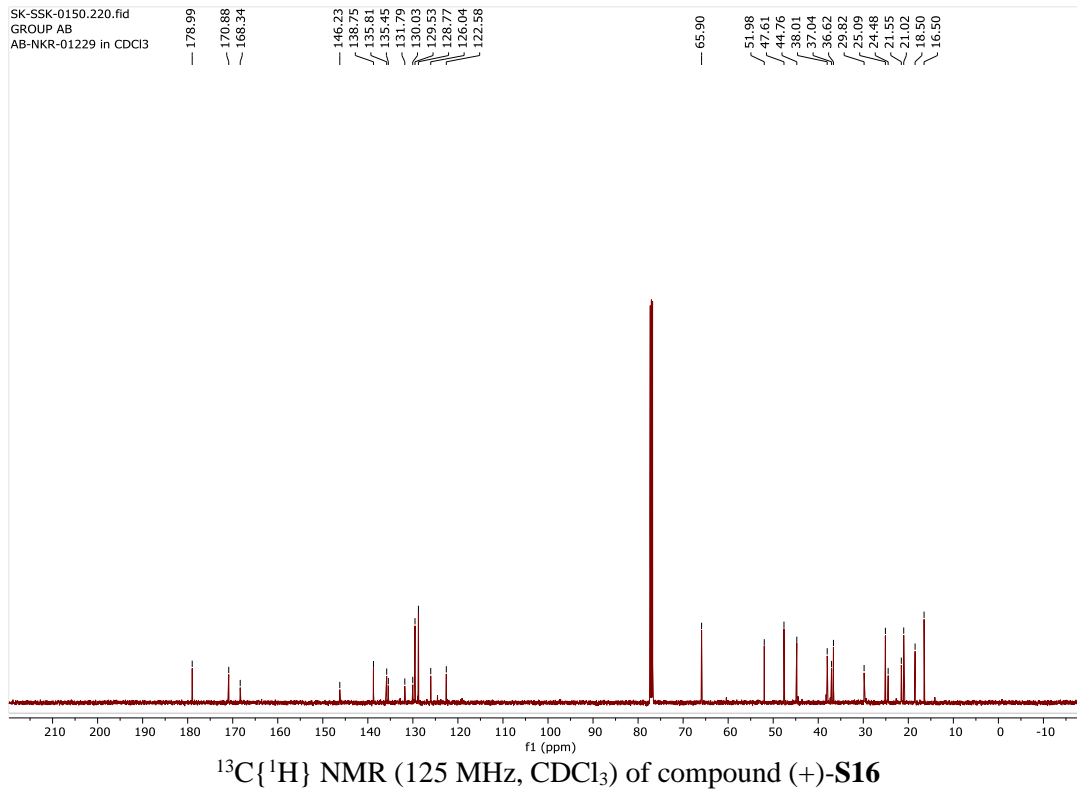

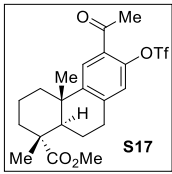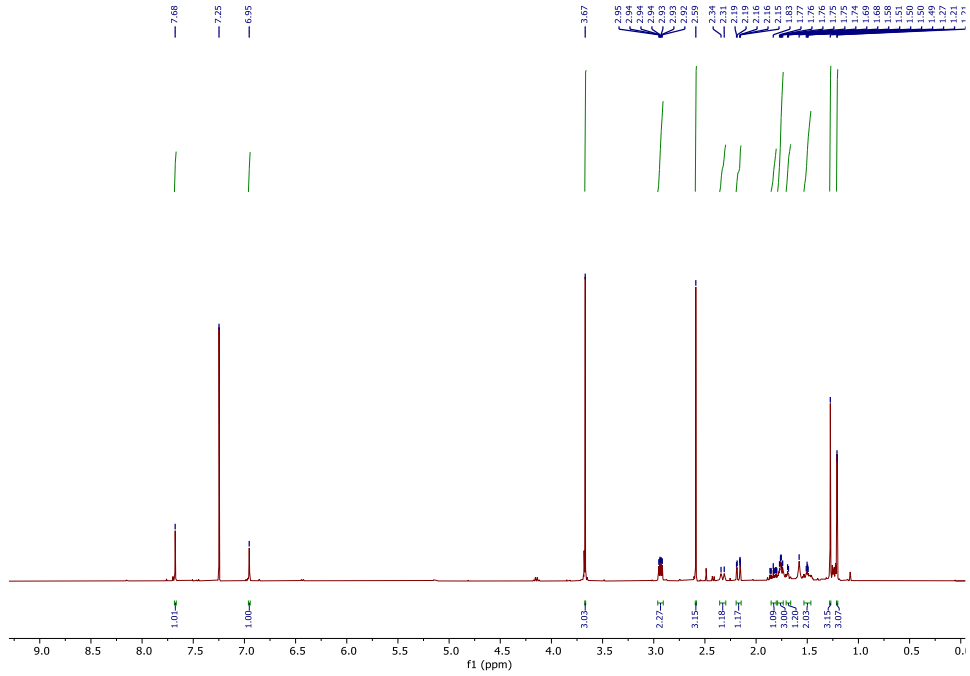

$^1\text{H}$  NMR (500 MHz,  $\text{CDCl}_3$ ) of compound **S17**

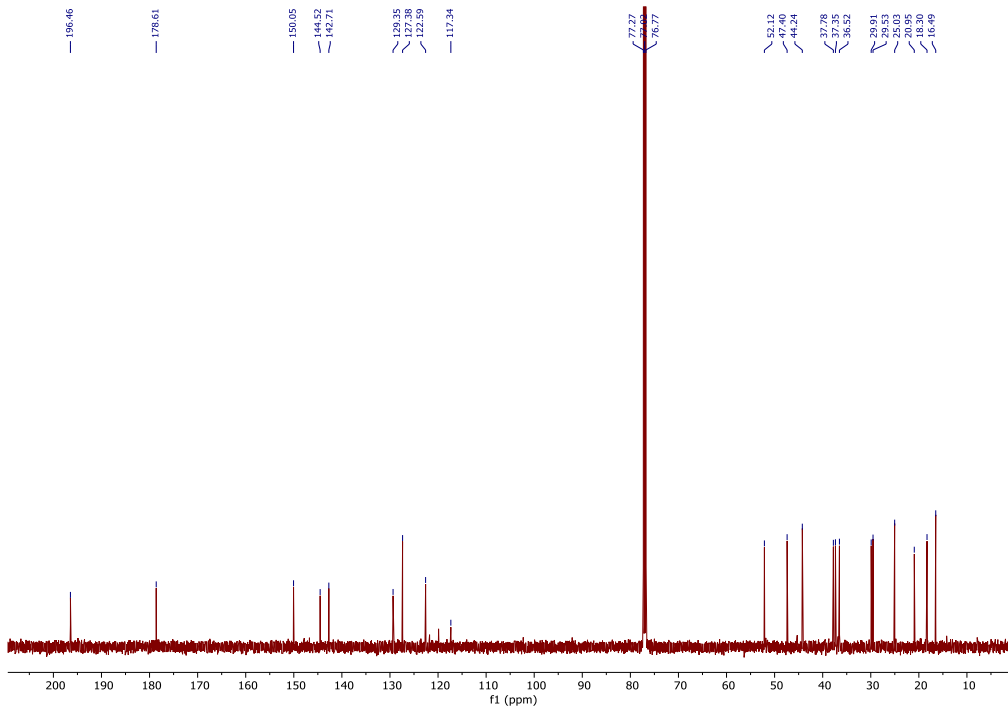

$^{13}\text{C}\{^1\text{H}\}$  NMR (125 MHz,  $\text{CDCl}_3$ ) of compound **S17**

AB25-Apr-2024 13:23:34  
AB-NKR-01036 (0.053) Is (1.00,1.00) C21H25F3O6SNa

IISER - KOLKATA

1: TOF MS ES+  
7.45e12

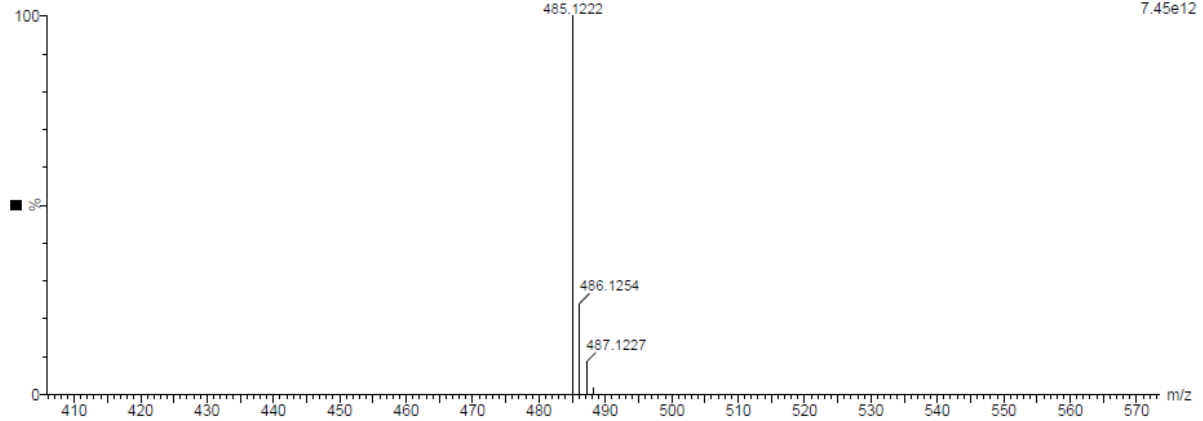

AB-NKR-01036 4 (0.104) AM2 (Ar,22000,0,556.28,0,00,LS 10); ABS

1: TOF MS ES+  
2.96e6

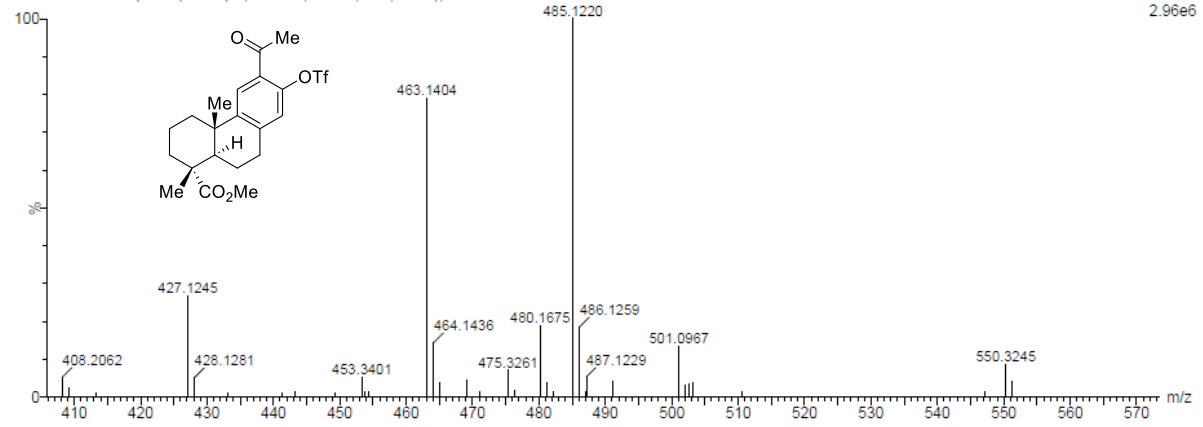

Mass data of compound S17

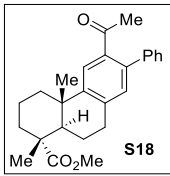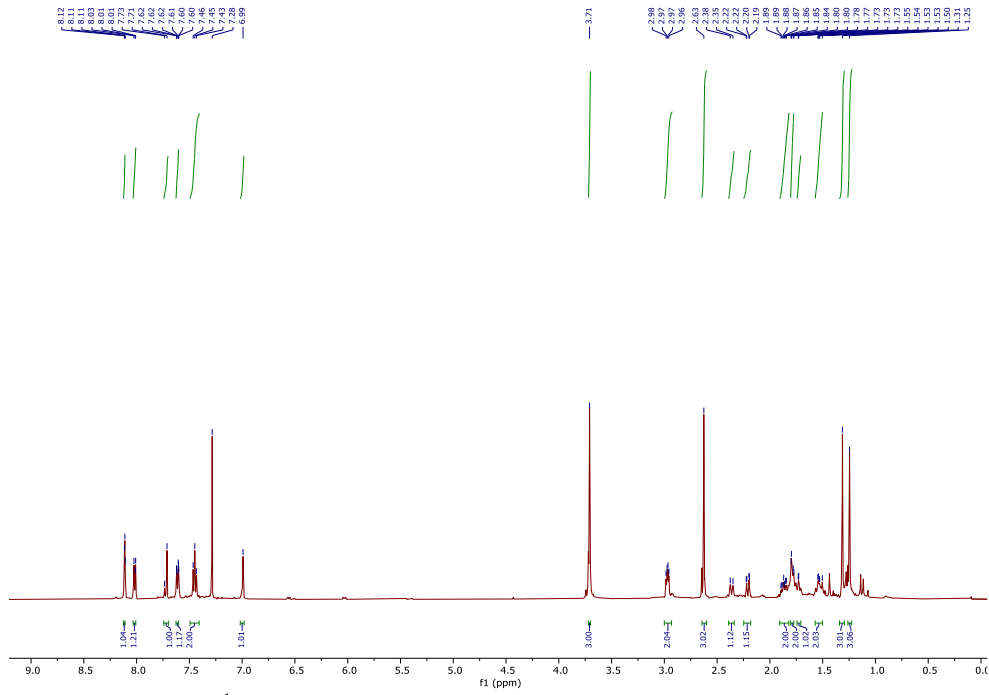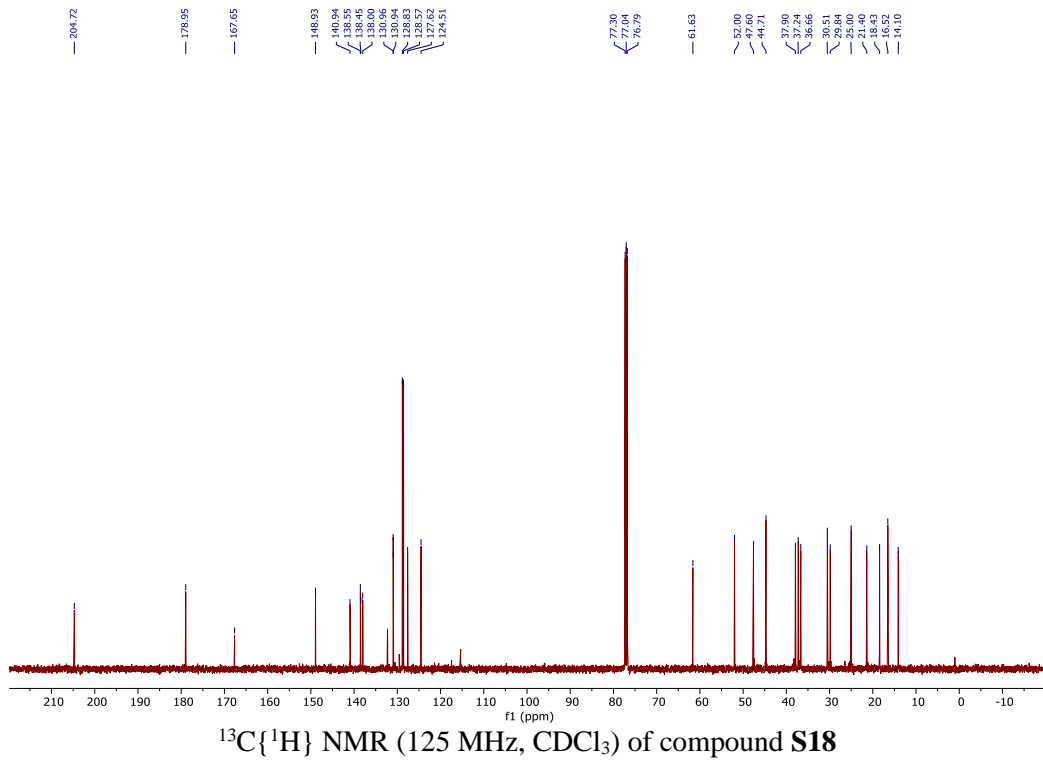

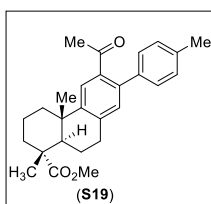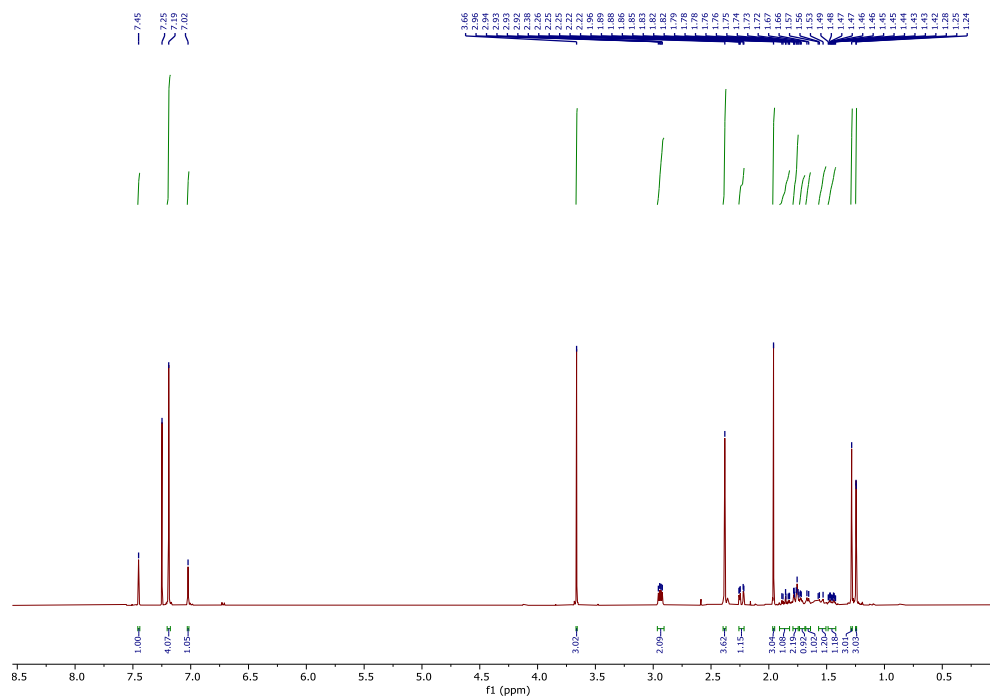

<sup>1</sup>H NMR (400 MHz, CDCl<sub>3</sub>) of compound **S19**

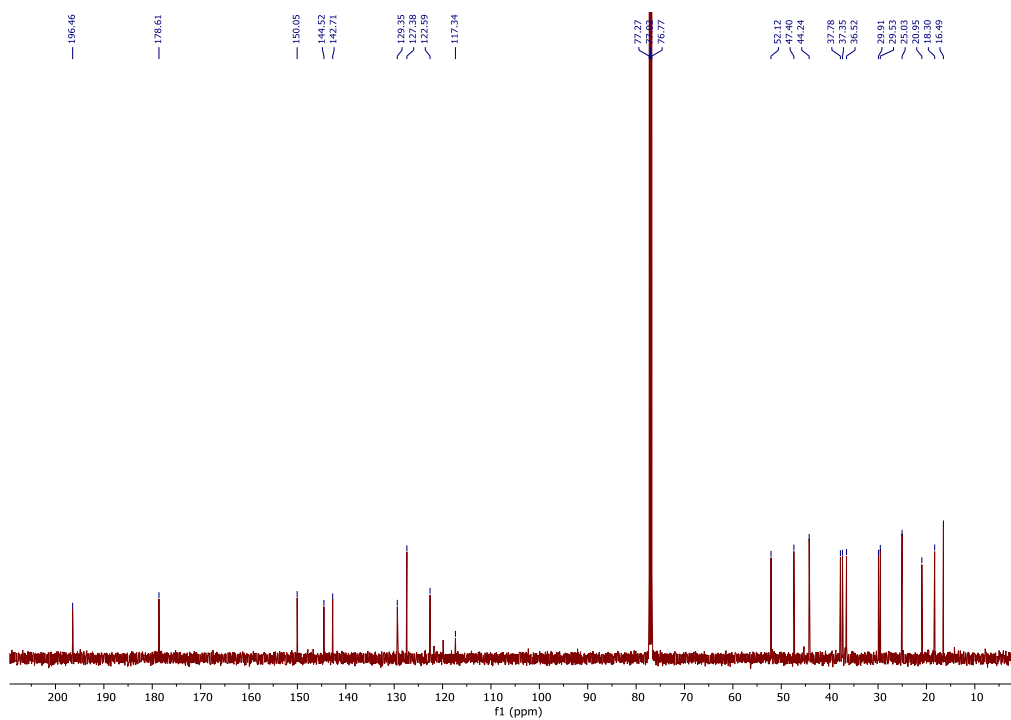

<sup>13</sup>C{<sup>1</sup>H} NMR (125 MHz, CDCl<sub>3</sub>) of compound **S19**

AB22-Apr-2024 13:13:33

IISER - KOLKATA

1: TOF MS ES+  
7.40e12

AB-NKR-0239 (0.053) Is (1.00,1.00) C27H33O3

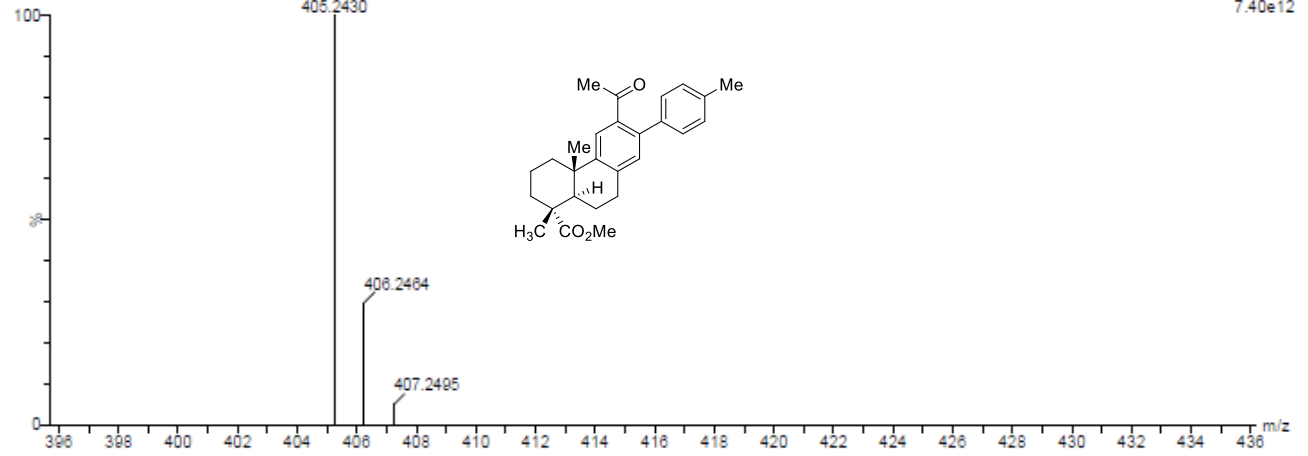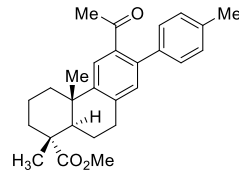

AB-NKR-0239 3 (0.087) AM2 (Ar,22000,0.556,28.0,0.0,LS 10); ABS

1: TOF MS ES+  
5.90e6

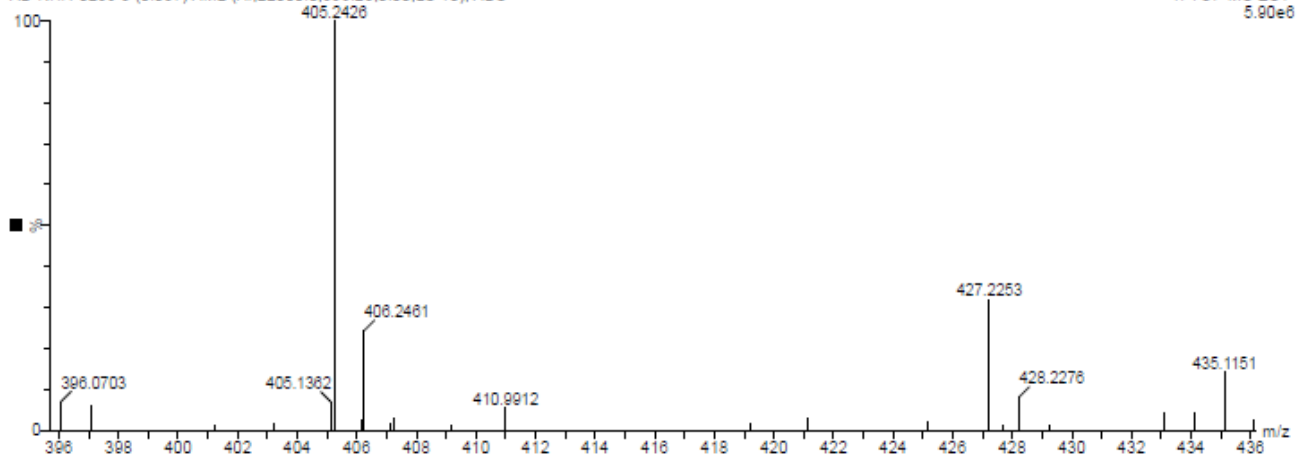

Mass spectrum of compound S19



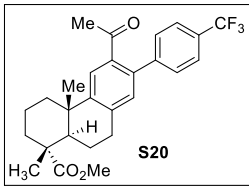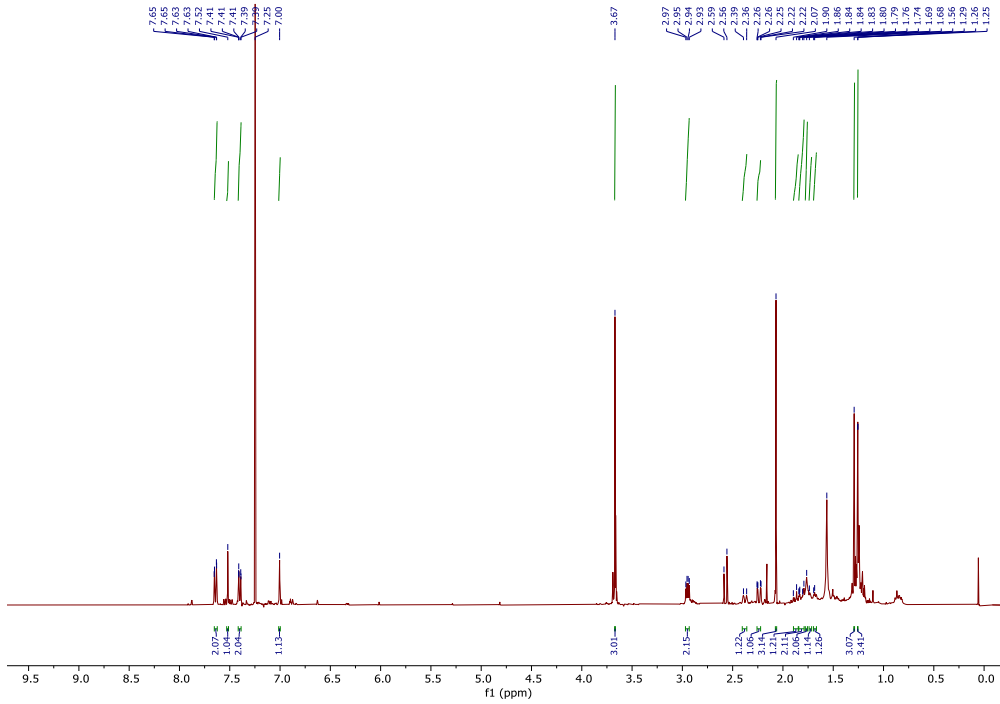

<sup>1</sup>H NMR (500 MHz, CDCl<sub>3</sub>) of compound S20

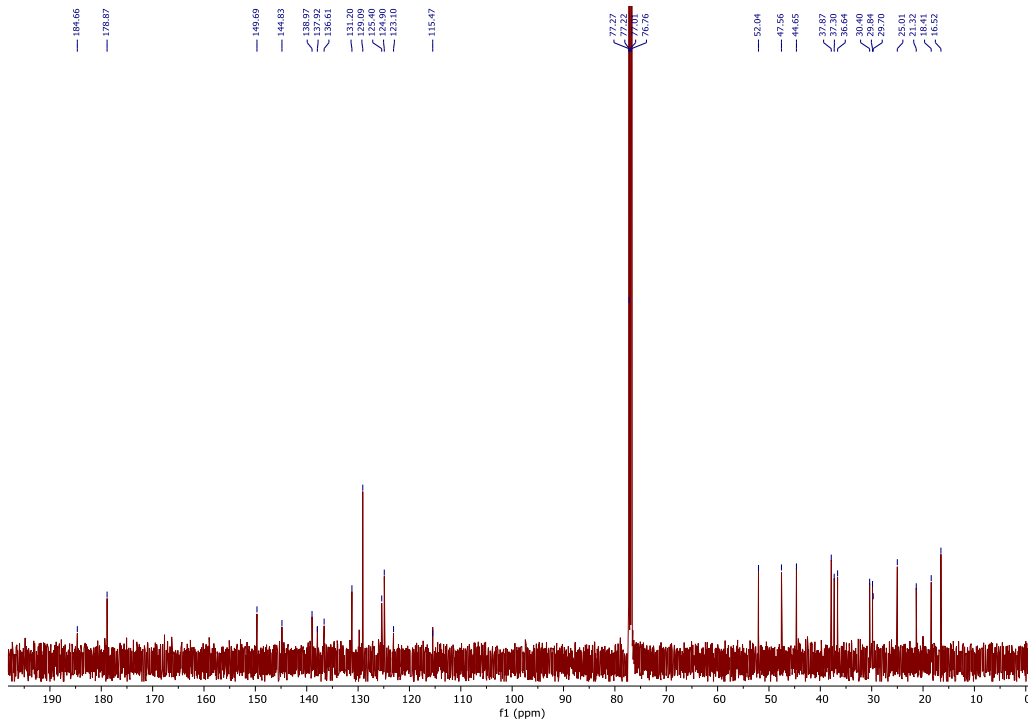

<sup>13</sup>C{<sup>1</sup>H} NMR (125 MHz, CDCl<sub>3</sub>) of compound S20

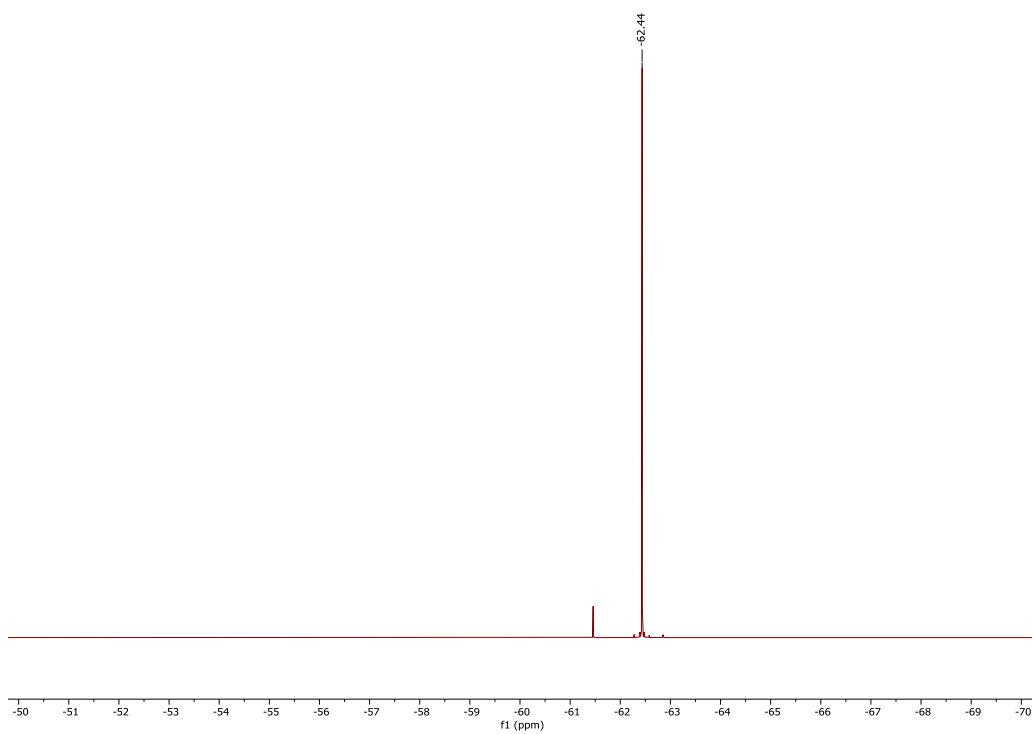

$^{19}\text{F}\{^1\text{H}\}$  NMR (471 MHz,  $\text{CDCl}_3$ ) of compound **S20**

AB22-Apr-2024 13:16:48  
AB-NKR-01290 (0.053) Is (1.00,1.00) C27H30F3O3

IISER - KOLKATA

1: TOF MS ES+  
7.40e12

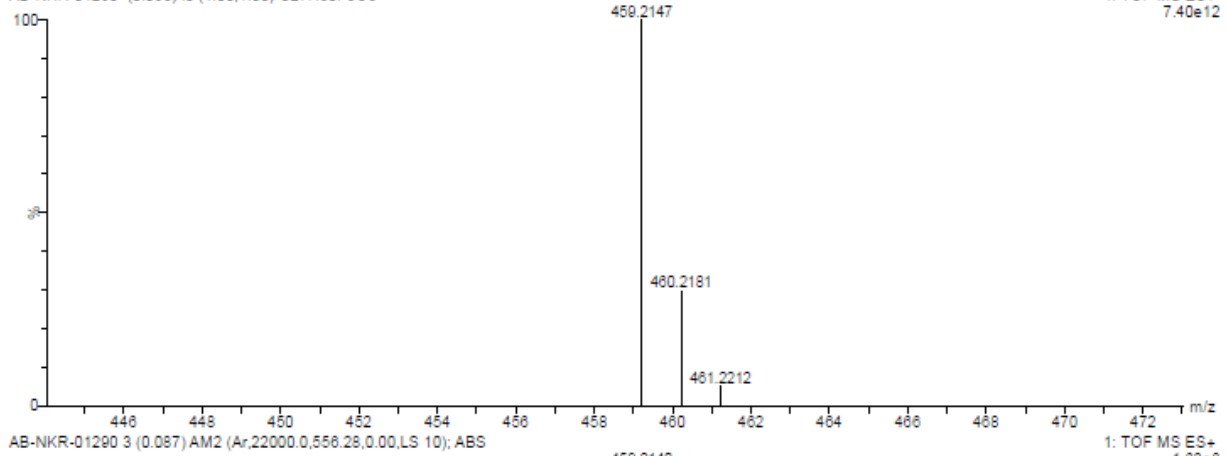

AB-NKR-01290 3 (0.087) AM2 (Ar,22000.0,556.28,0.00,LS 10); ABS

1: TOF MS ES+  
1.83e6

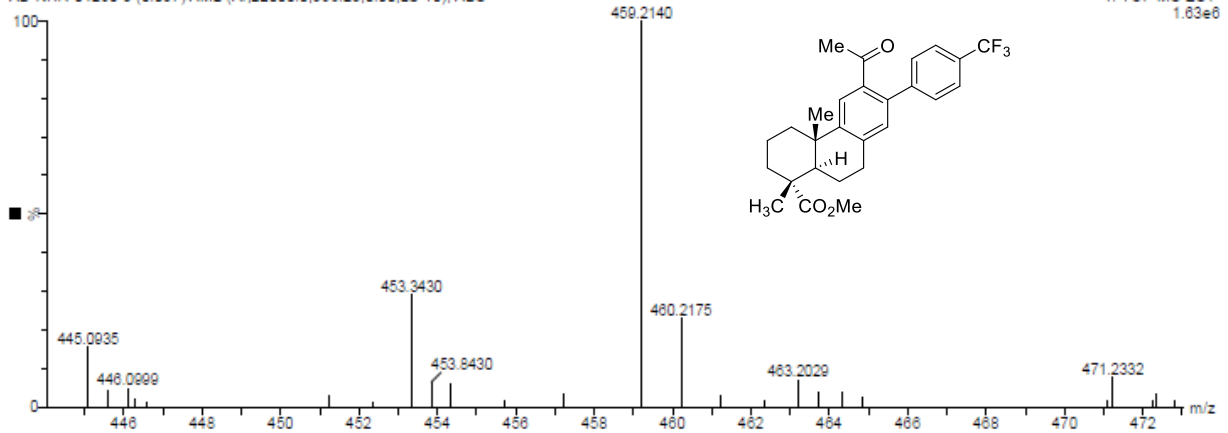

Mass spectrum of compound S20

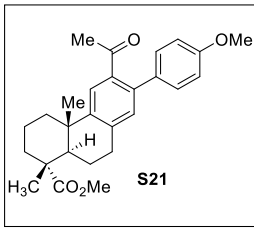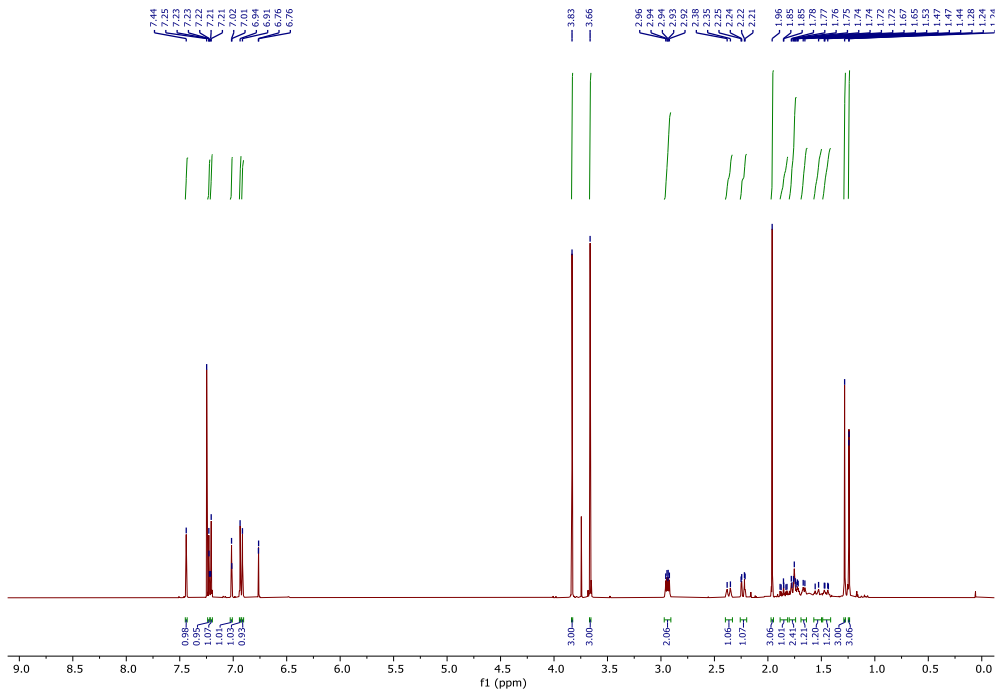

<sup>1</sup>H NMR (500 MHz, CDCl<sub>3</sub>) of compound **S21**

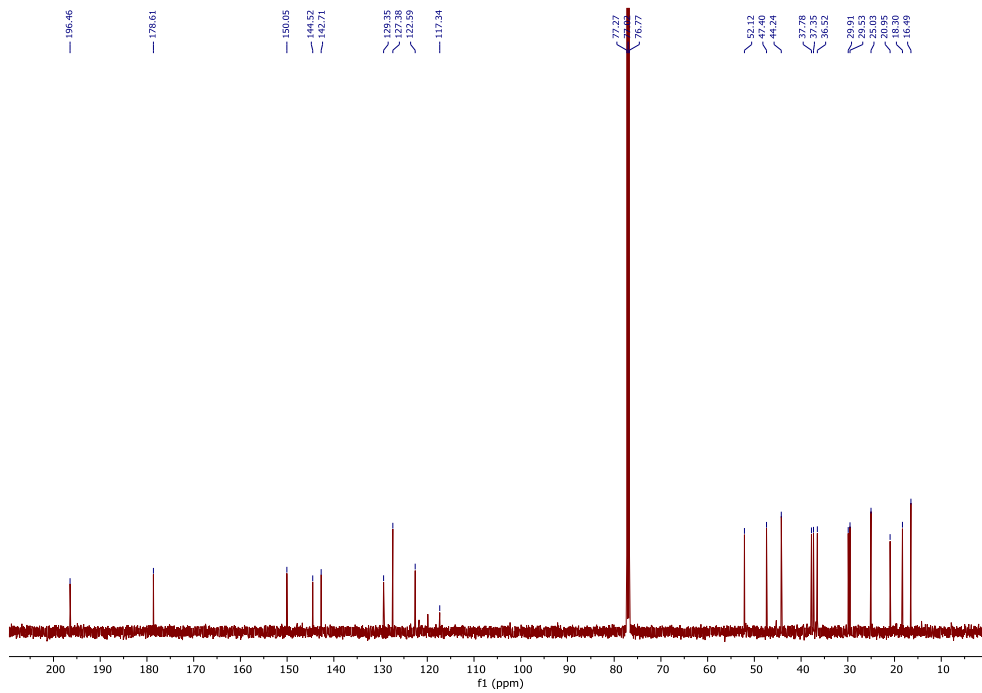

<sup>13</sup>C{<sup>1</sup>H} NMR (125 MHz, CDCl<sub>3</sub>) of compound **S21**

AB22-Apr-2024 12:14:42  
AB-NKR-01241 (0.053) Is (1.00,1.00) C27H33O4

IISER - KOLKATA

1: TOF MS ES+  
7.38e12

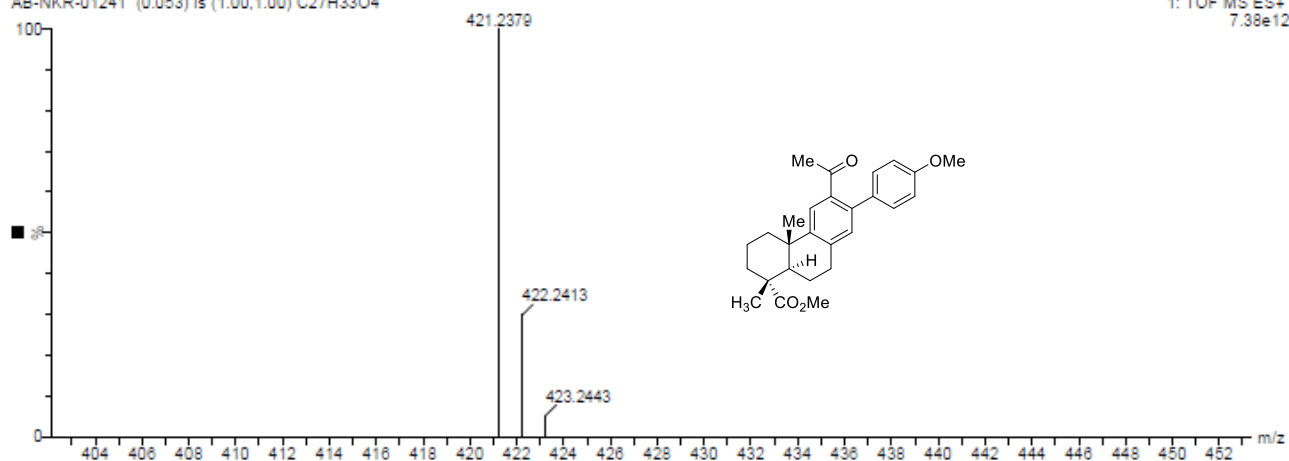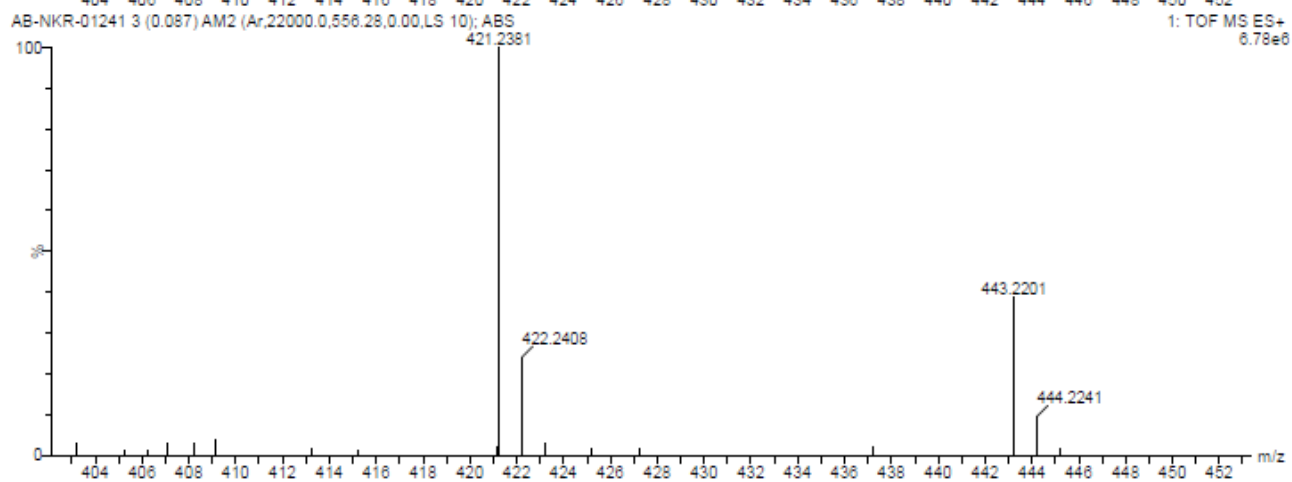

Mass spectrum of compound S21

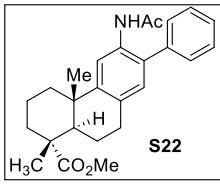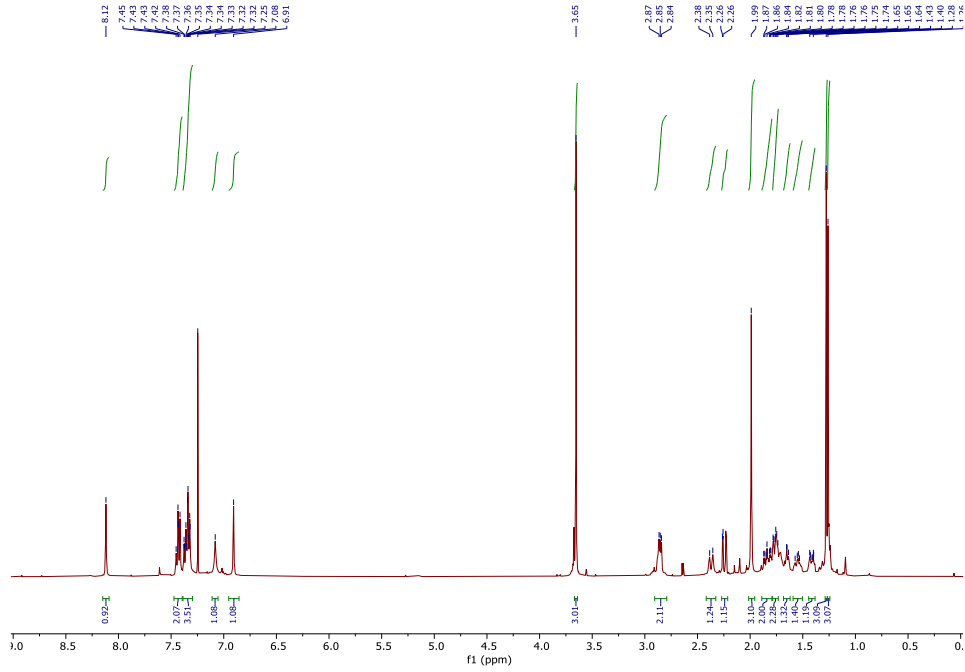

<sup>1</sup>H NMR (500 MHz, CDCl<sub>3</sub>) of compound **S22**

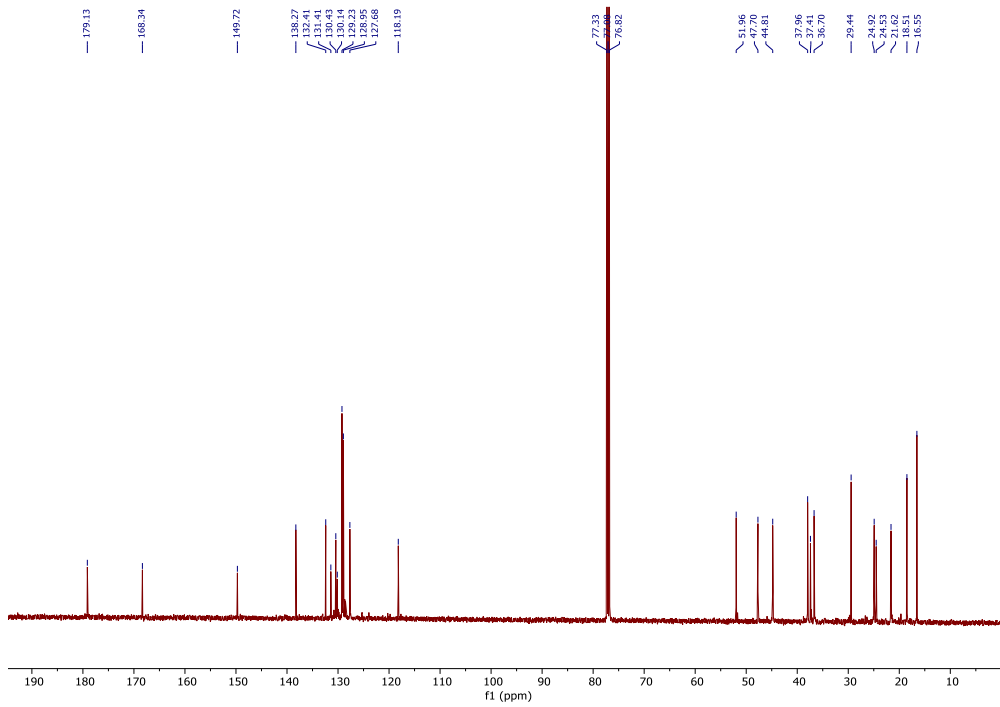

<sup>13</sup>C NMR (125 MHz, CDCl<sub>3</sub>) of compound **S22**

AB28-Mar-2024 14:02:25  
AB-NKR-01040 (0.070) Is (1.00,1.00) C26H32NO3

IISER - KOLKATA

1: TOF MS ES+  
7.45e12

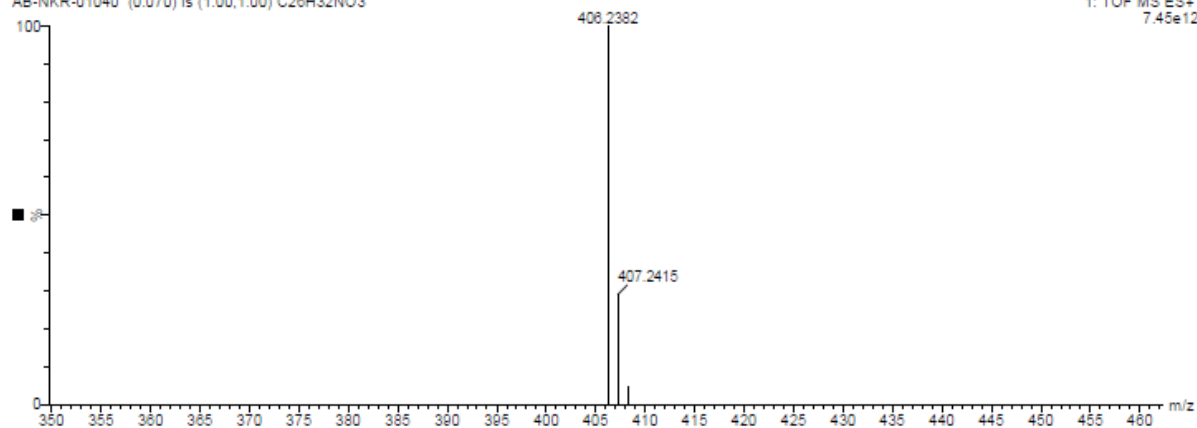

AB-NKR-01040 2 (0.070) AM (Cen,4, 80.00, Ar,100000.0,0.00,0.00)

1: TOF MS ES+  
5.39e6

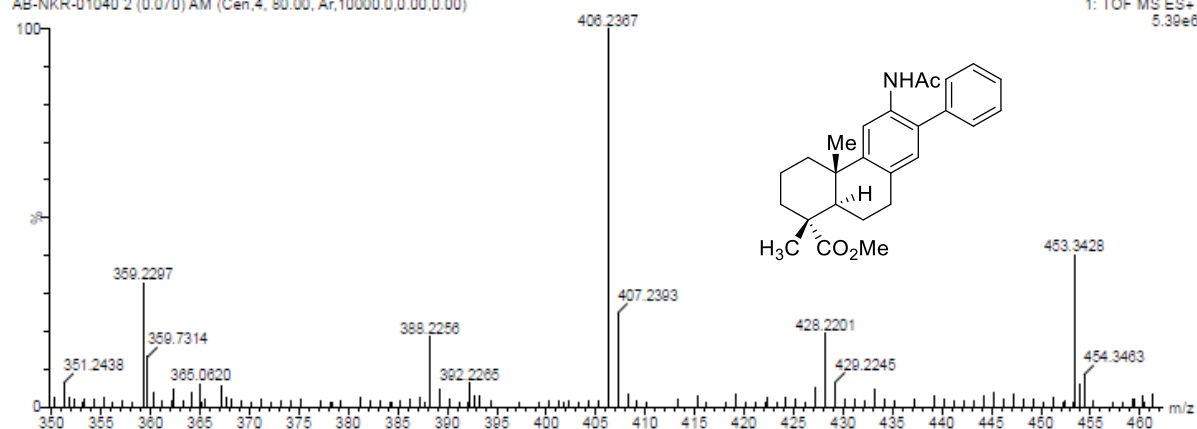

Mass spectrum of compound S22

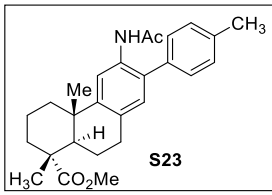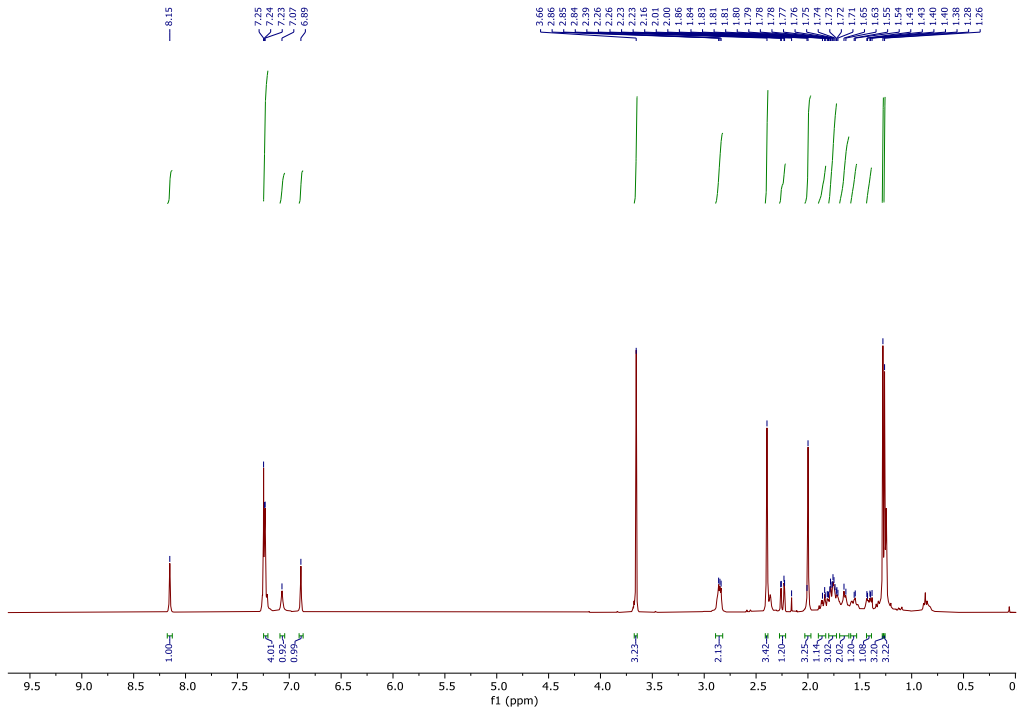

<sup>1</sup>H NMR (400 MHz, CDCl<sub>3</sub>) of compound **S23**

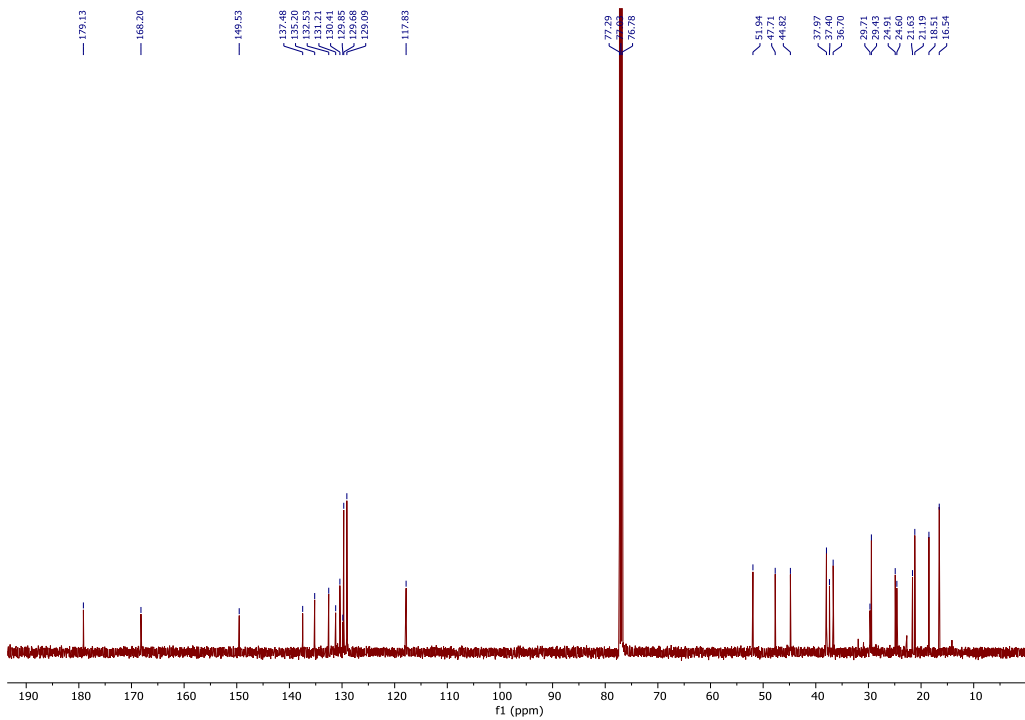

<sup>13</sup>C{<sup>1</sup>H} NMR (125 MHz, CDCl<sub>3</sub>) of compound **S23**



AB23-Apr-2024 17:07:16  
AB-NKR-01247 (0.053) Is (1.00,1.00) C27H34NO3

IISER - KOLKATA

1: TOF MS ES+  
7.37e12

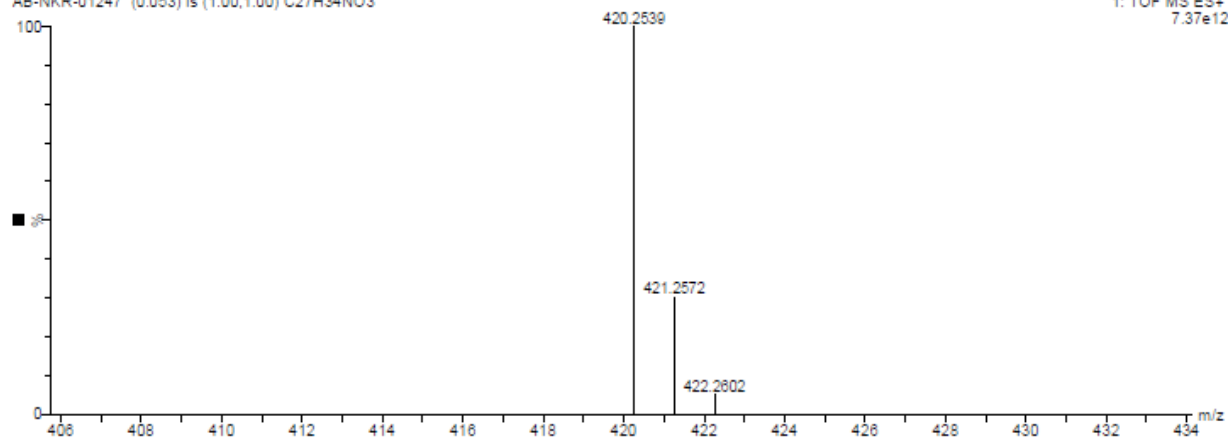

AB-NKR-01247 3 (0.087) AM2 (Ar,22000,0,556.28,0,00,LS 10); ABS

1: TOF MS ES+  
1.23e7

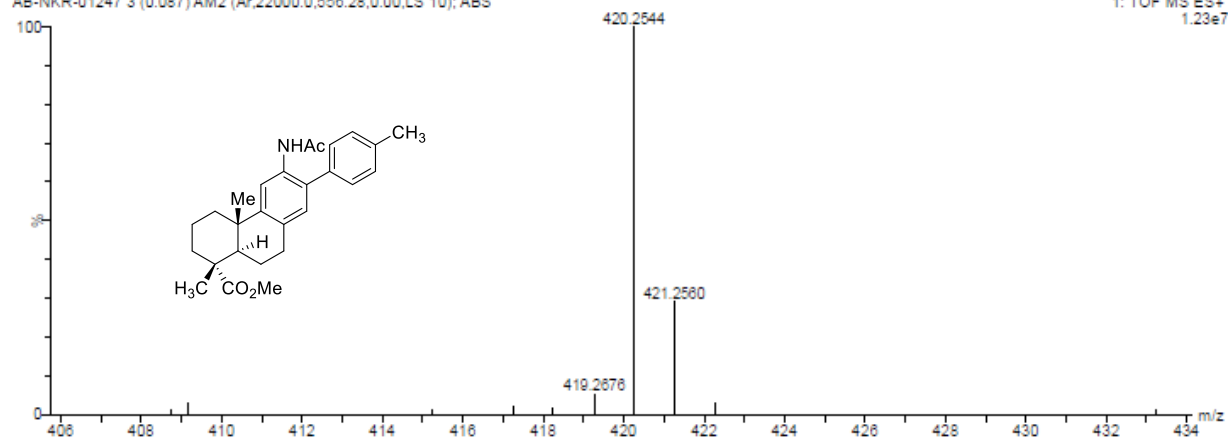

Mass data of compound S23

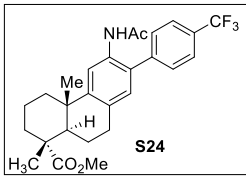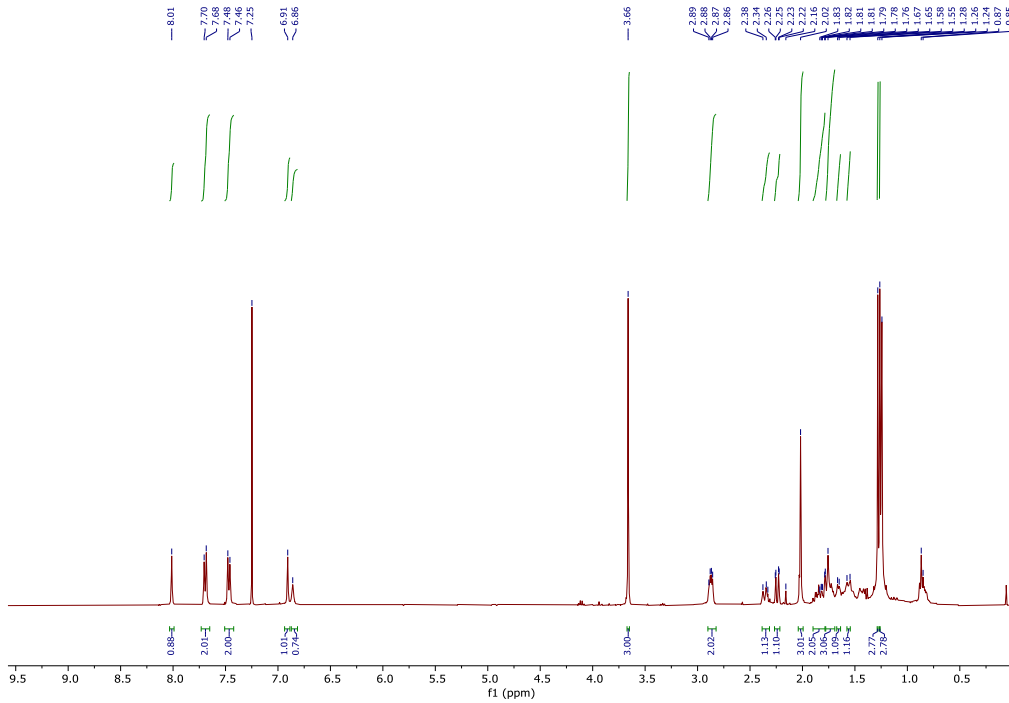

<sup>1</sup>H NMR (400 MHz, CDCl<sub>3</sub>) of compound **S24**

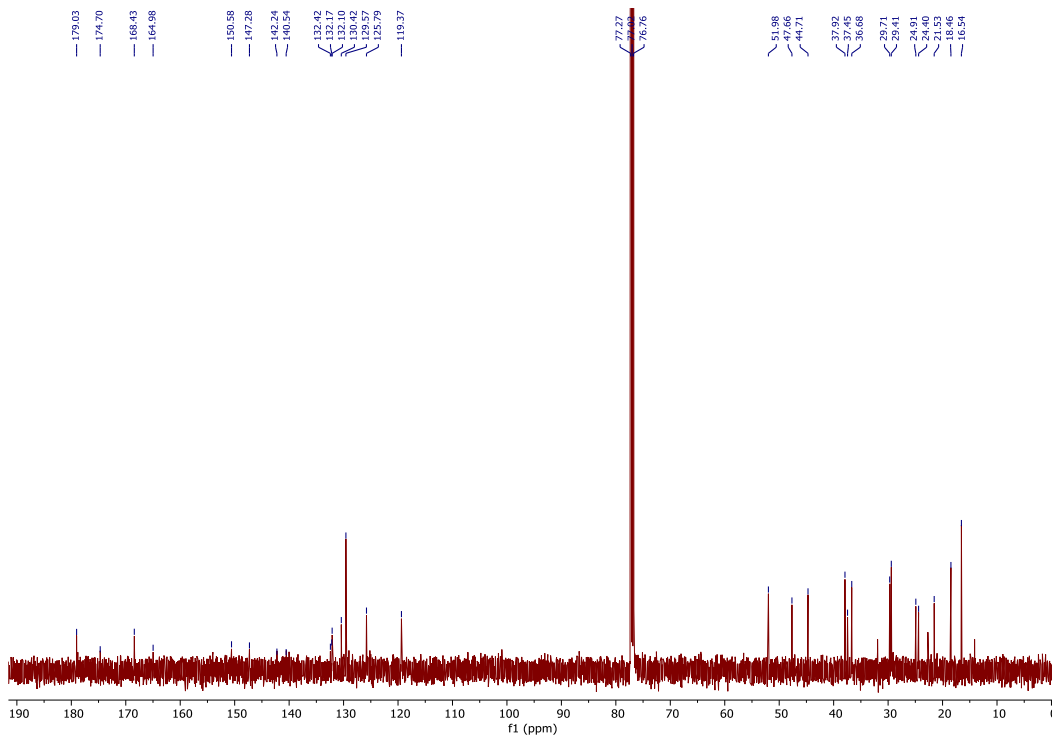

<sup>13</sup>C{<sup>1</sup>H} NMR (125 MHz, CDCl<sub>3</sub>) of compound **S24**

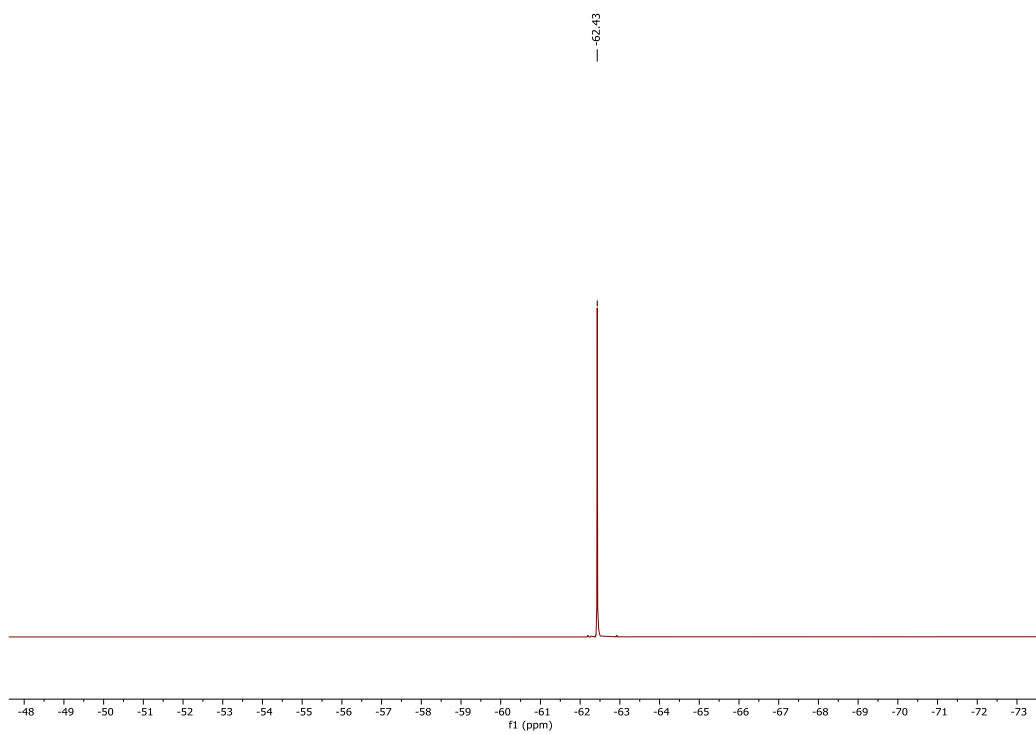

$^{19}\text{F}\{^1\text{H}\}$  NMR (376 MHz,  $\text{CDCl}_3$ ) of compound **S24**

AB23-Apr-2024 17:10:24  
AB-NKR-01249 (0.053) Is (1.00,1.00) C27H31F3NO3

IISER - KOLKATA

1: TOF MS ES+  
7.37e12

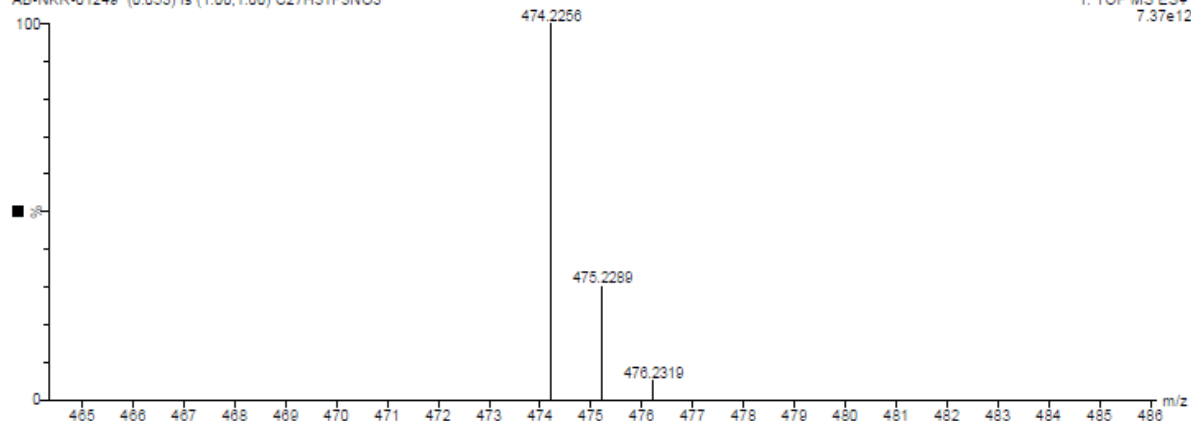

AB-NKR-01249 2 (0.070) AM2 (Ar,22000.0,556.28,0.00,LS 10); ABS

1: TOF MS ES+  
1.09e8

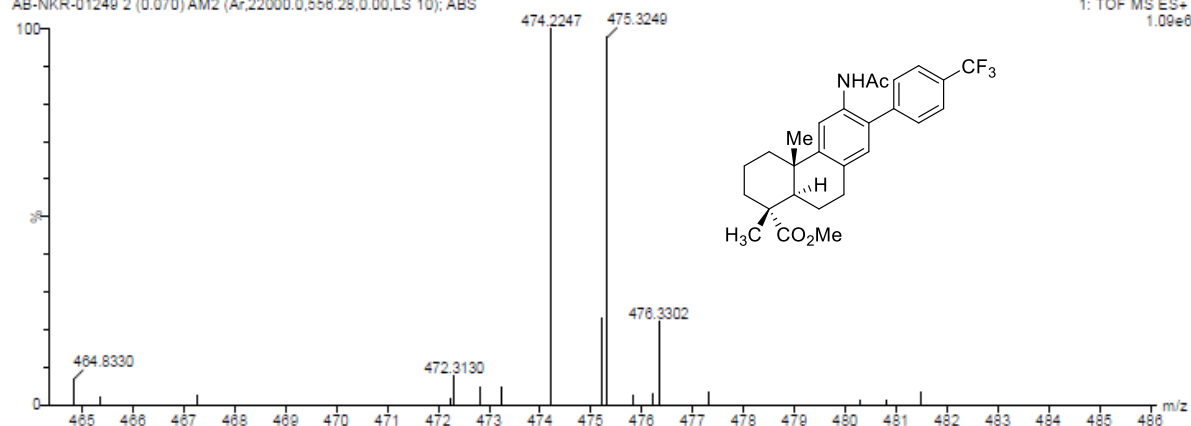

Mass spectrum of compound S24

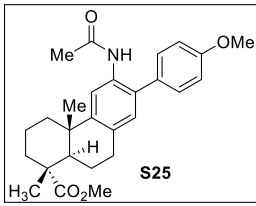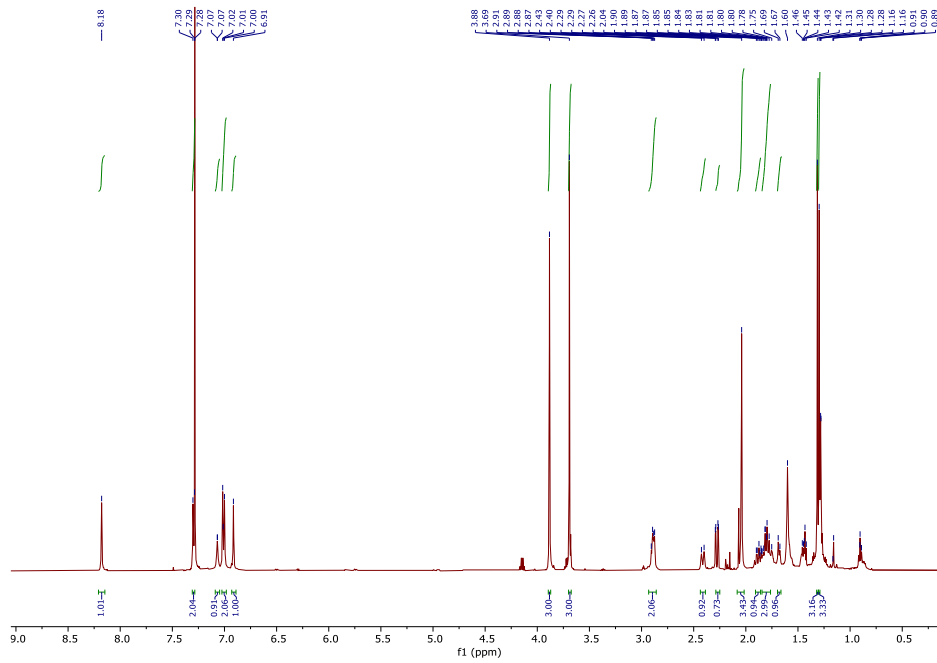

$^1\text{H}$  NMR (400 MHz,  $\text{CDCl}_3$ ) of compound **S25**

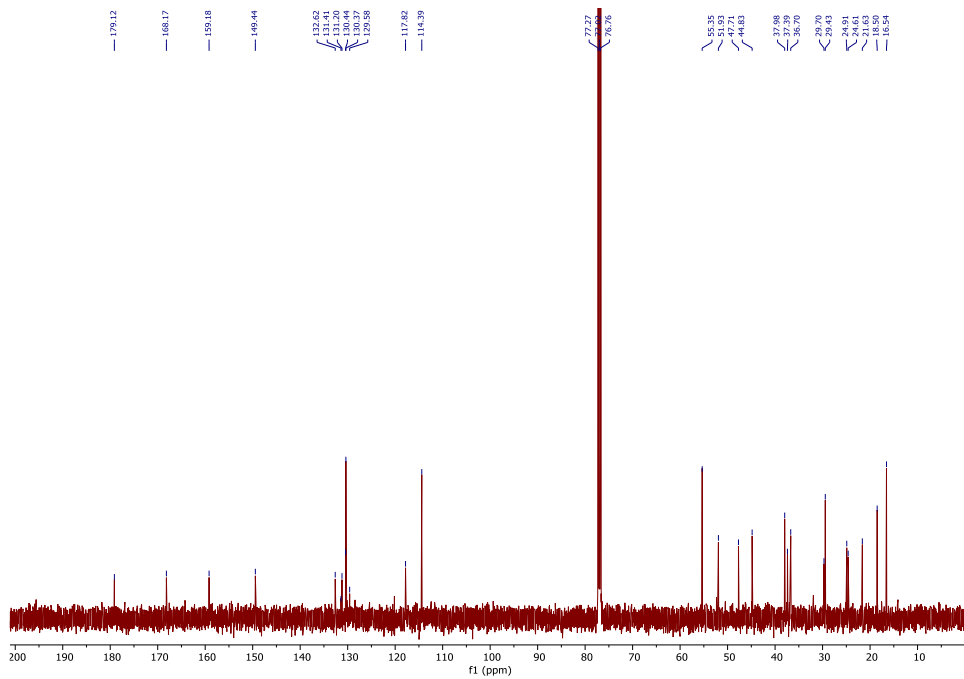

$^{13}\text{C}\{^1\text{H}\}$  NMR (125 MHz,  $\text{CDCl}_3$ ) of compound **S25**

AB24-Apr-2024 16:52:51

AB-NKR-01248a (0.053) Is (1.00,1.00) C27H34NO4

IISER - KOLKATA

1: TOF MS ES+  
7.35e12

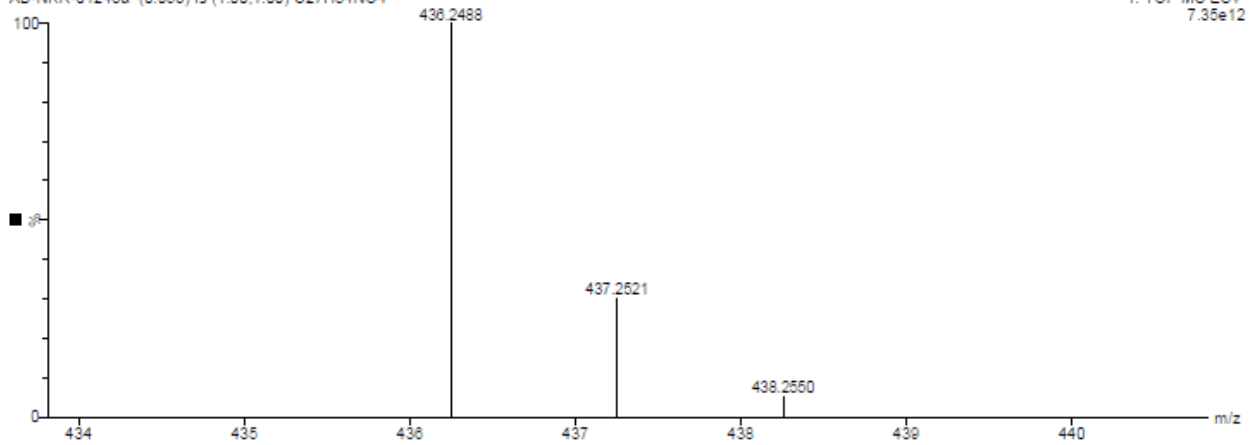

AB-NKR-01248a 3 (0.087) AM2 (Ar,22000.0,556.28,0.00,LS 10); ABS

1: TOF MS ES+  
1.19e6

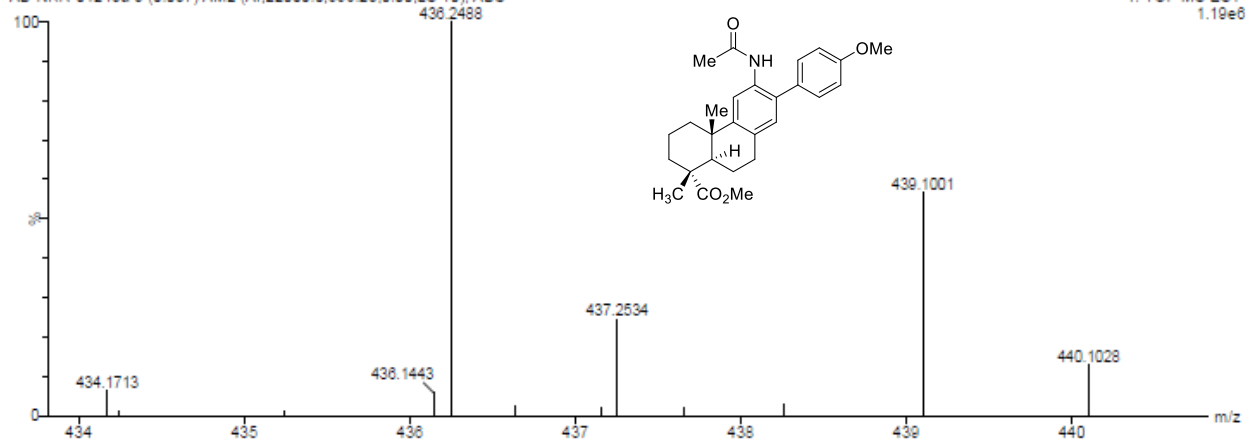

Mass spectrum of compound S25

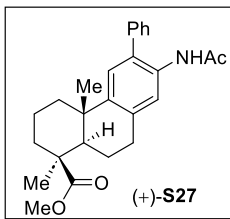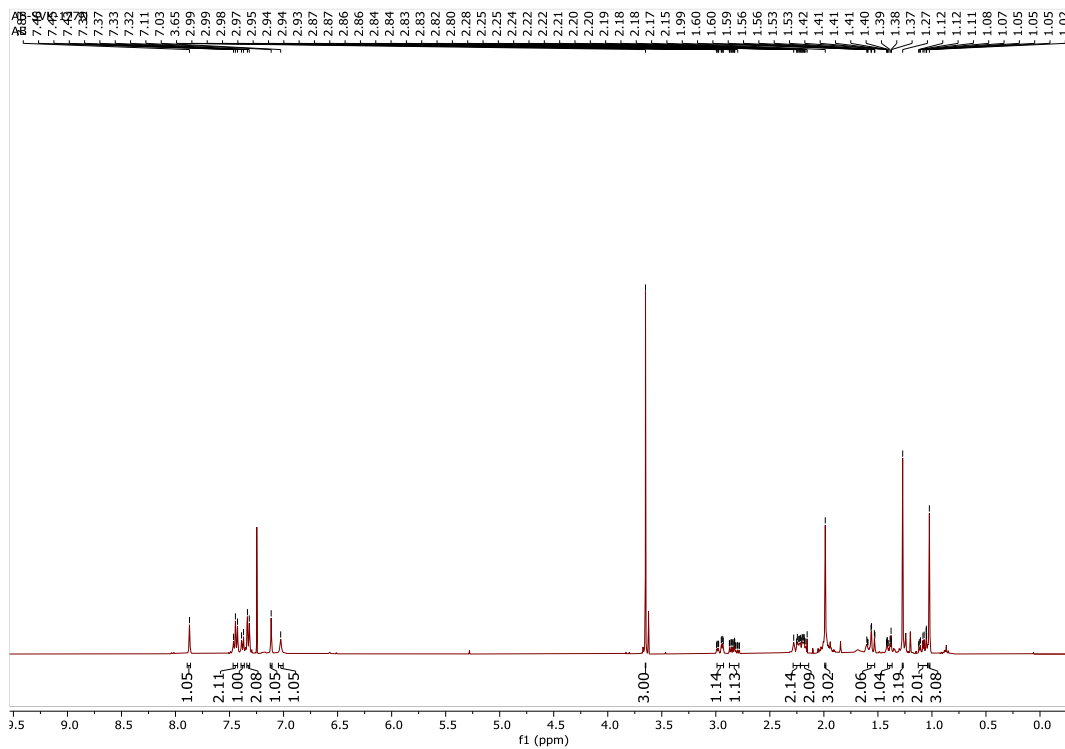

$^1\text{H}$  NMR (400 MHz,  $\text{CDCl}_3$ ) of compound (+)-S27

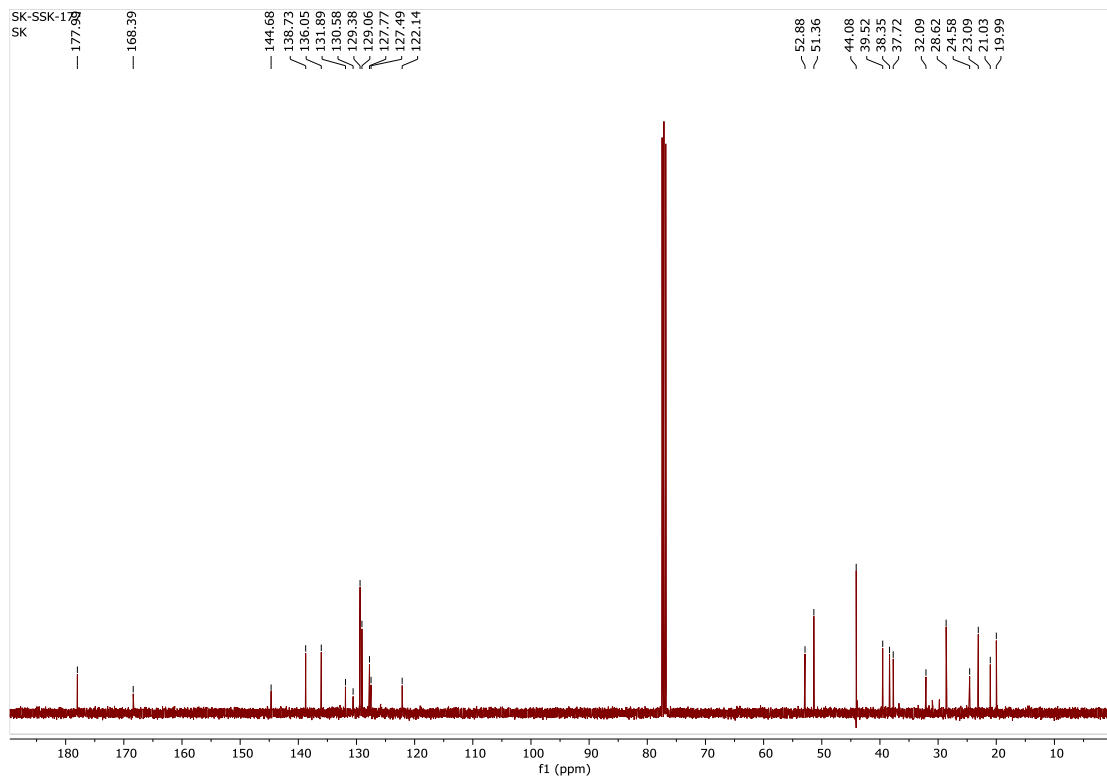

$^{13}\text{C}\{^1\text{H}\}$  NMR (101 MHz,  $\text{CDCl}_3$ ) of compound (+)-S27

# Display Report

## Analysis Info

Analysis Name D:\Data\User data\2022\MAR\ab\_mm\_01\_322.d  
Method Tune\_pos\_Standard.m  
Sample Name ab\_mm\_01\_322  
Comment signal dropping issue

Acquisition Date 3/21/2022 1:07:47 PM

Operator IISER Kolkata  
Instrument maXis impact 8282001.00127

## Acquisition Parameter

|             |          |                      |          |                  |           |
|-------------|----------|----------------------|----------|------------------|-----------|
| Source Type | ESI      | Ion Polarity         | Positive | Set Nebulizer    | 0.5 Bar   |
| Focus       | Active   | Set Capillary        | 3400 V   | Set Dry Heater   | 200 °C    |
| Scan Begin  | 50 m/z   | Set End Plate Offset | -500 V   | Set Dry Gas      | 4.0 l/min |
| Scan End    | 1000 m/z | Set Charging Voltage | 2000 V   | Set Divert Valve | Source    |
|             |          | Set Corona           | 0 nA     | Set APCI Heater  | 0 °C      |

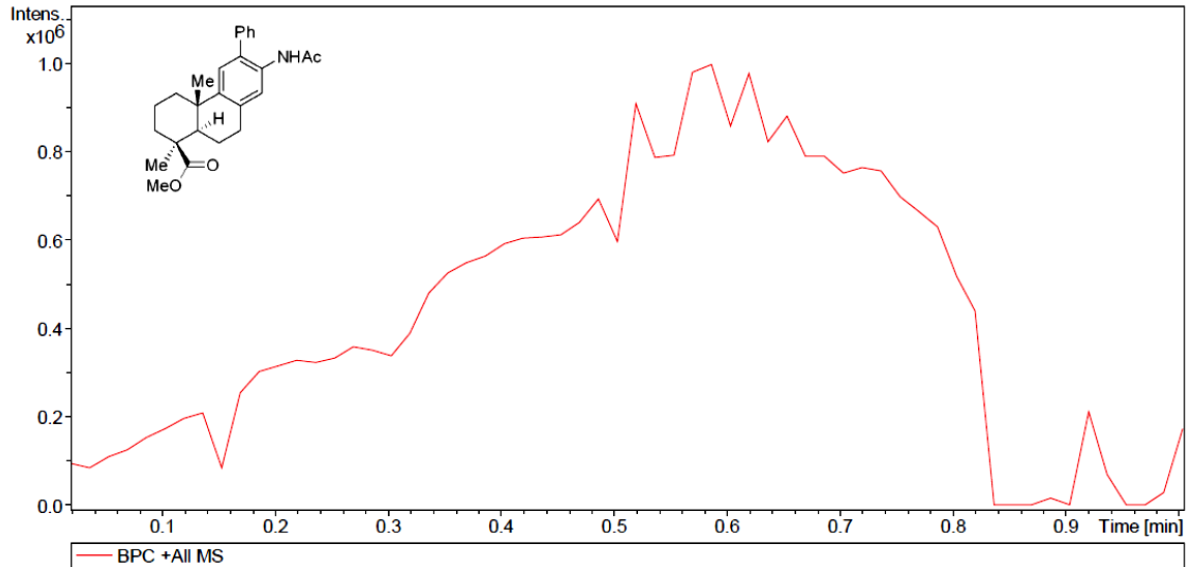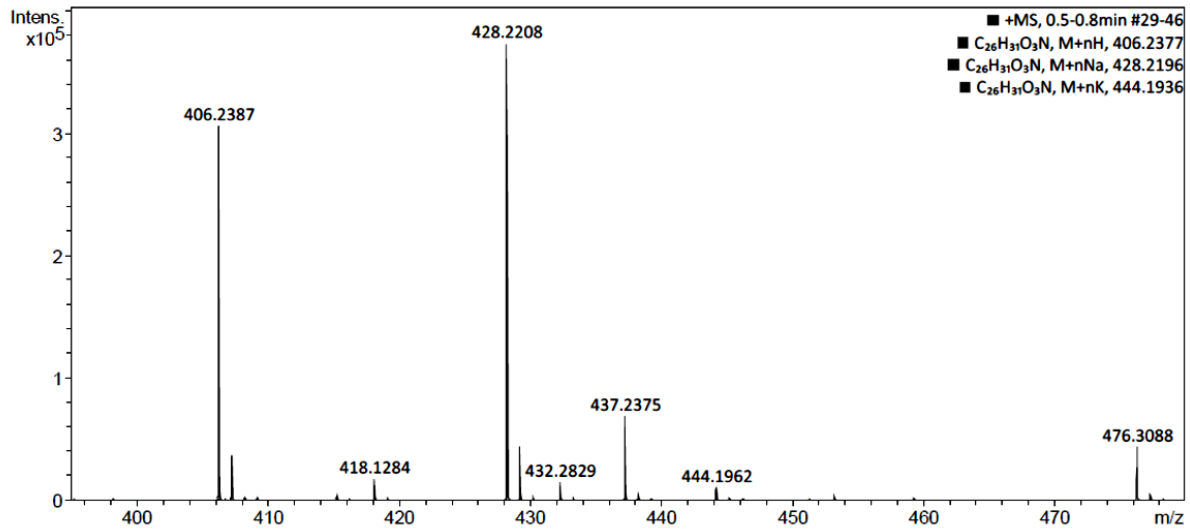

ab\_mm\_01\_322.d

Bruker Compass DataAnalysis 4.1

printed: 3/21/2022 1:10:25 PM

by: IISER Kolkata

Page 1 of 1

HRMS data of (+)-S27



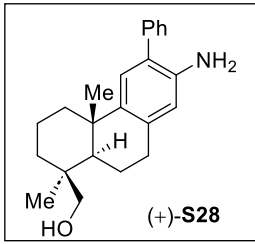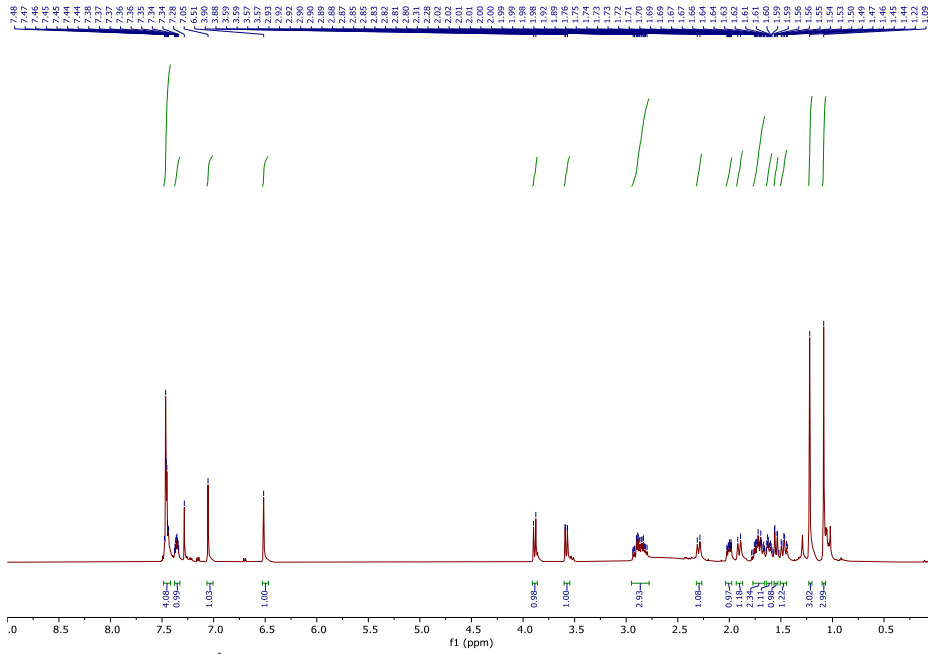

<sup>1</sup>H NMR (500 MHz, CDCl<sub>3</sub>) of (+)-S28

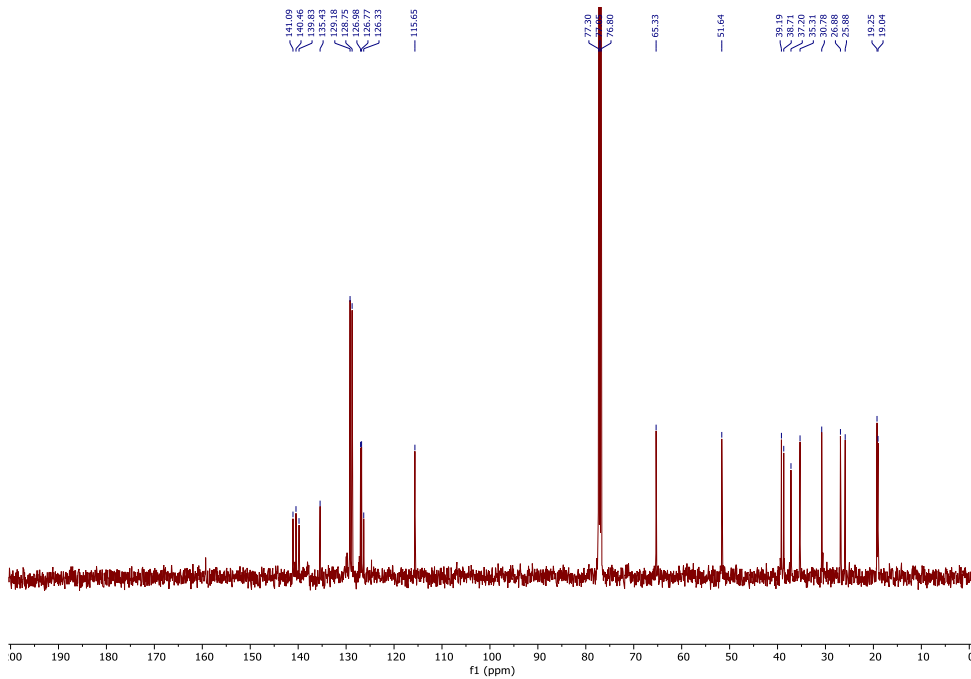

<sup>13</sup>C{<sup>1</sup>H} NMR (125 MHz, CDCl<sub>3</sub>) of (+)-S28

## Display Report

**Analysis Info**

|               |                                                                                          |
|---------------|------------------------------------------------------------------------------------------|
| Analysis Name | D:\Data\NEW USER DATA 2022\April-2022\22-April\Prof.A.Bisai-AB-MM-02323_1-A_3_01_11803.d |
| Method        | hrlcms-20 sept.m                                                                         |
| Sample Name   | Prof.A.Bisai-AB-MM-02323                                                                 |
| Comment       |                                                                                          |

**Acquisition Date** 4/22/2022 12:30:09 PM

**Operator** RUCHI  
**Instrument** micrOTOF-Q II 10330

**Acquisition Parameter**

|             |          |                       |           |                  |           |
|-------------|----------|-----------------------|-----------|------------------|-----------|
| Source Type | ESI      | Ion Polarity          | Positive  | Set Nebulizer    | 1.2 Bar   |
| Focus       | Active   | Set Capillary         | 4500 V    | Set Dry Heater   | 200 °C    |
| Scan Begin  | 50 m/z   | Set End Plate Offset  | -500 V    | Set Dry Gas      | 6.0 l/min |
| Scan End    | 3000 m/z | Set Collision Cell RF | 130.0 Vpp | Set Divert Valve | Waste     |

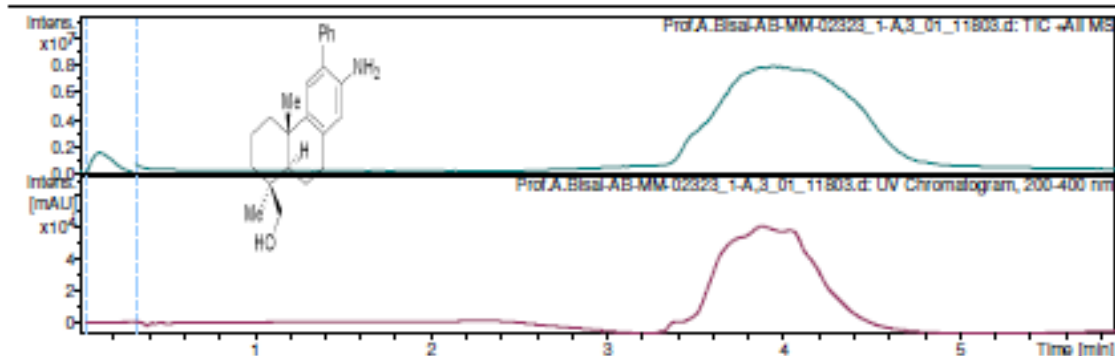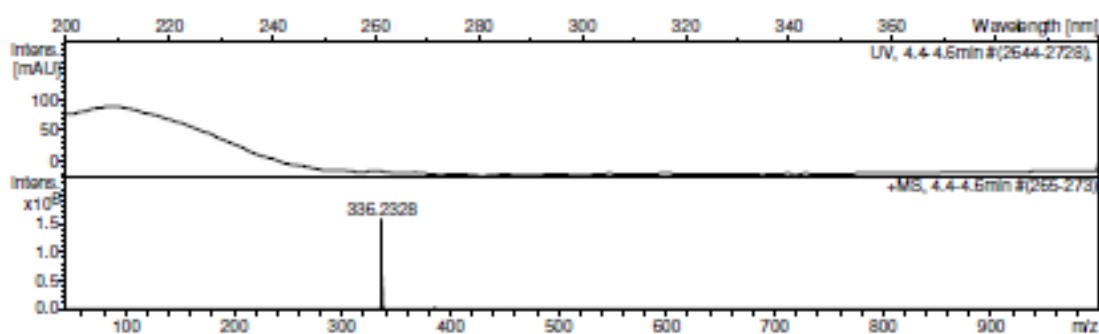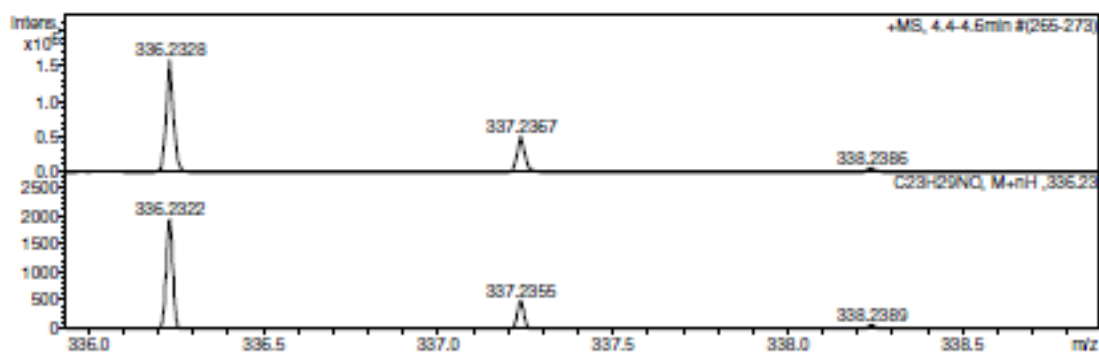

HRMS data of (+)-S28

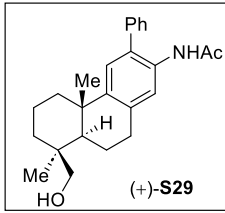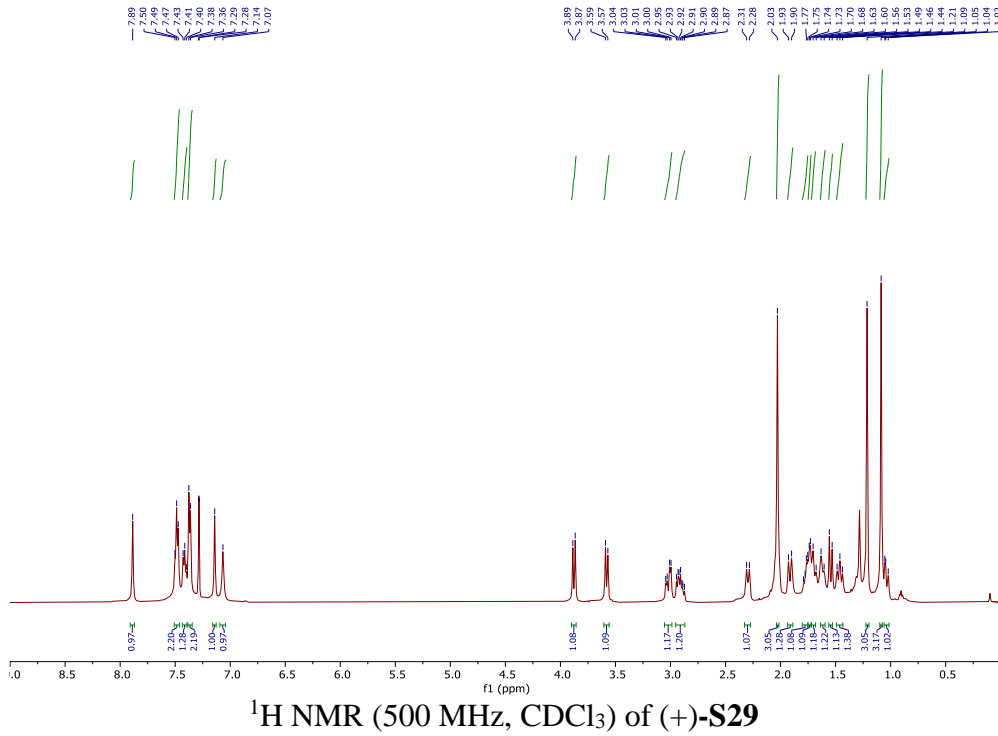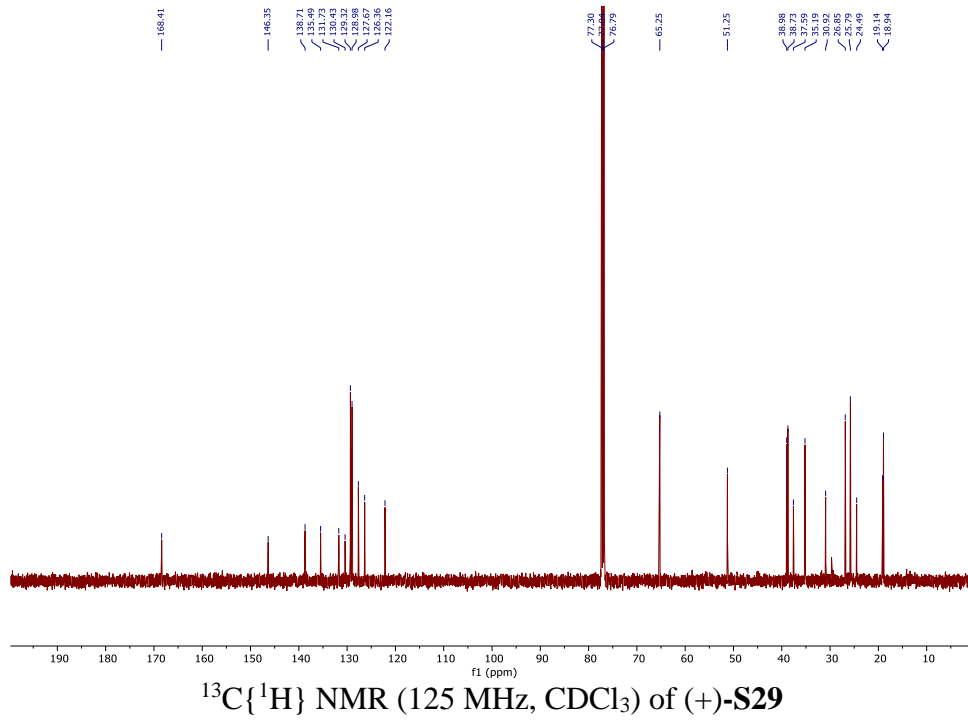

# Display Report

## Analysis Info

Analysis Name D:\Data\NEW USER DATA 2022\April-2022\20-april\Prof.A.Bisai-ABMM02327\_1-A,5\_01\_11792.d  
Method hrlcms-20 sept.m  
Sample Name Prof.A.Bisai-ABMM02327  
Acquisition Date 4/20/2022 12:27:13 PM  
Operator RUCHI  
Instrument micrOTOF-Q II 10330  
Comment

## Acquisition Parameter

|             |          |                       |           |                  |           |
|-------------|----------|-----------------------|-----------|------------------|-----------|
| Source Type | ESI      | Ion Polarity          | Positive  | Set Nebulizer    | 1.2 Bar   |
| Focus       | Active   | Set Capillary         | 4500 V    | Set Dry Heater   | 200 °C    |
| Scan Begin  | 50 m/z   | Set End Plate Offset  | -500 V    | Set Dry Gas      | 6.0 l/min |
| Scan End    | 3000 m/z | Set Collision Cell RF | 130.0 Vpp | Set Divert Valve | Waste     |

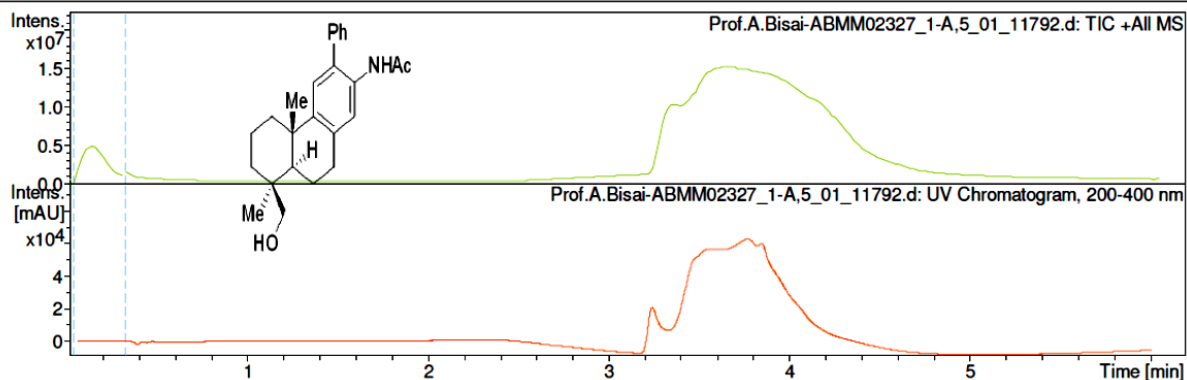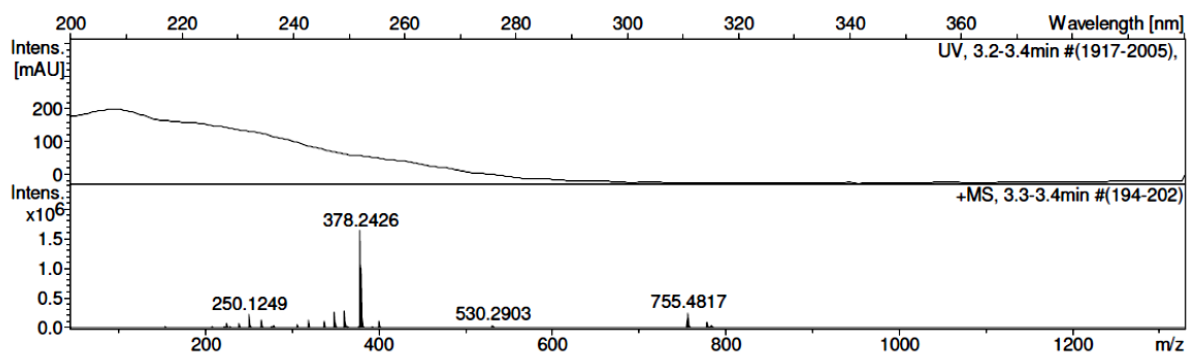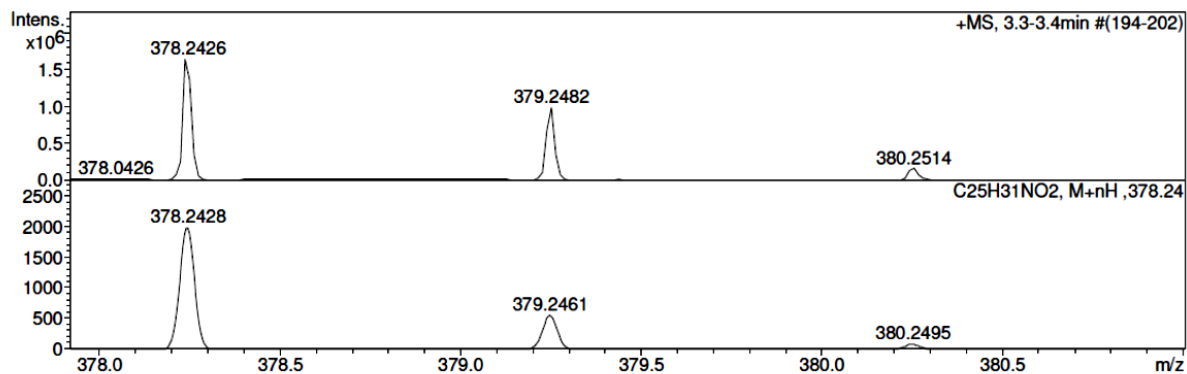

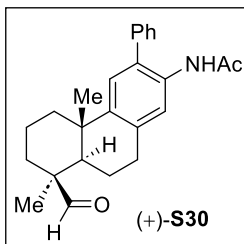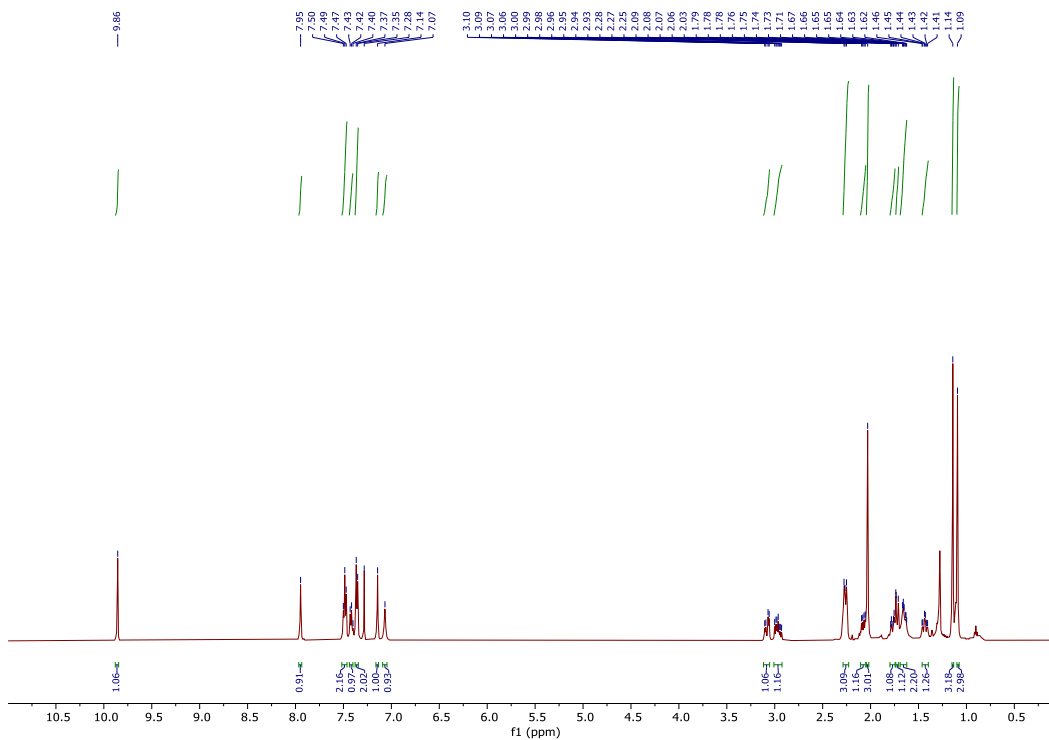

$^1\text{H NMR}$  (500 MHz,  $\text{CDCl}_3$ ) of (+)-S30

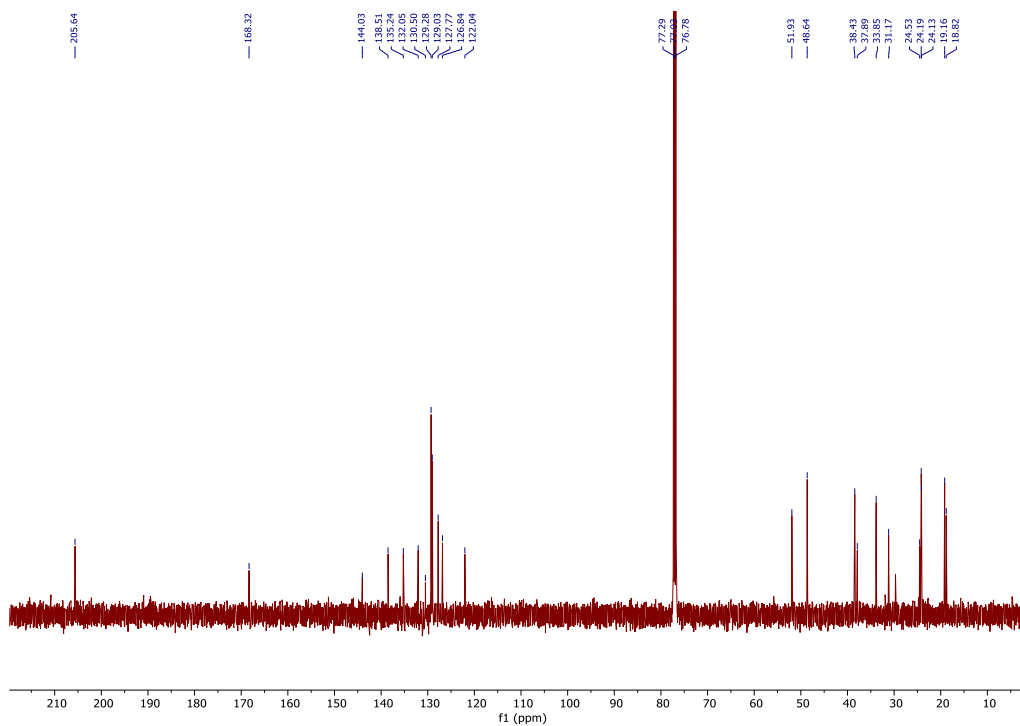

$^{13}\text{C}\{^1\text{H}\}$  NMR (125 MHz,  $\text{CDCl}_3$ ) of (+)-S30

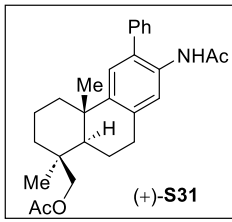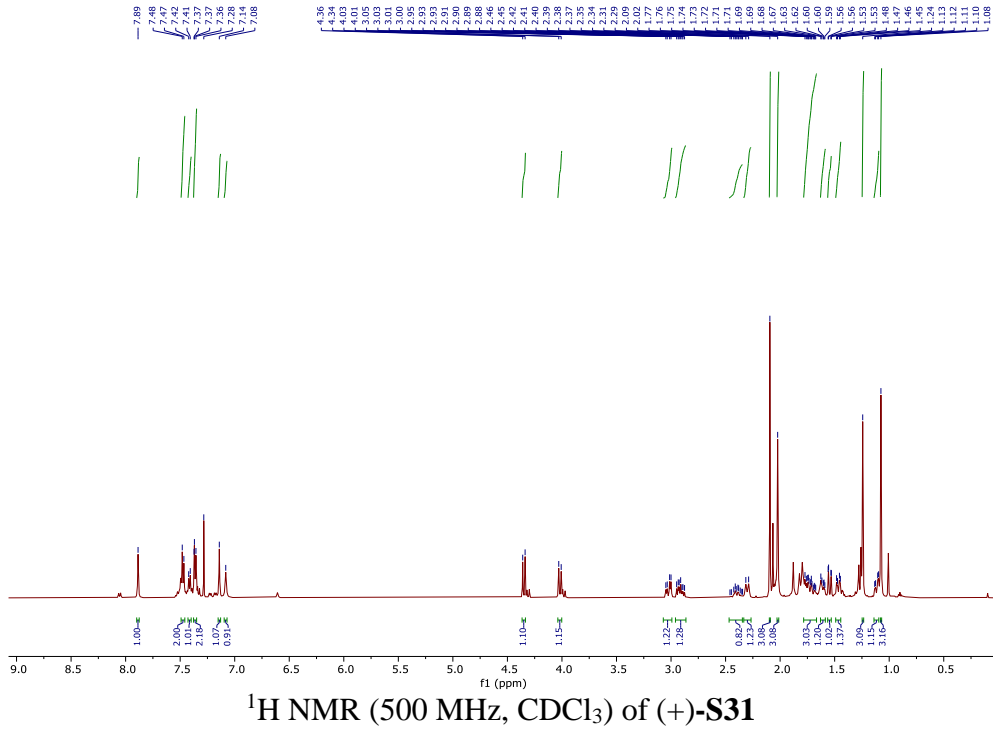

$^1\text{H}$  NMR (500 MHz,  $\text{CDCl}_3$ ) of (+)-S31

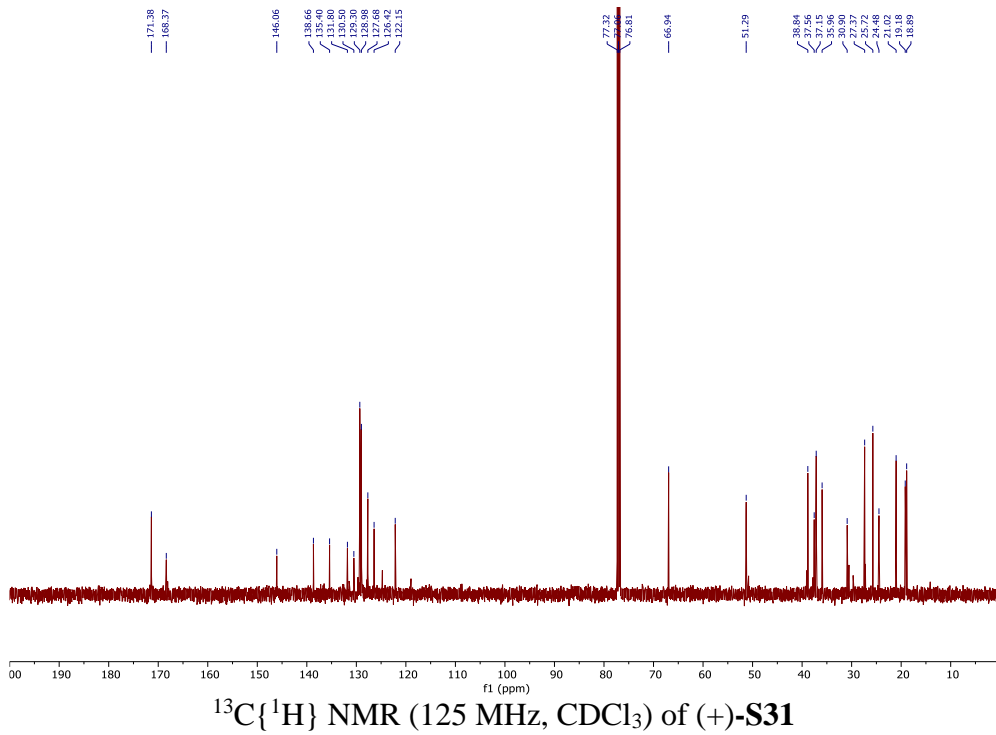

$^{13}\text{C}\{^1\text{H}\}$  NMR (125 MHz,  $\text{CDCl}_3$ ) of (+)-S31

# Display Report

## Analysis Info

Analysis Name D:\Data\NEW USER DATA 2022\April-2022\20-april\Prof.A.Bisai-ABMM02325\_1-A,3\_01\_11790.d  
Method hrlcms-20 sept.m  
Sample Name Prof.A.Bisai-ABMM02325  
Comment

Acquisition Date 4/20/2022 12:12:52 PM  
Operator RUCHI  
Instrument micrOTOF-Q II 10330

## Acquisition Parameter

|             |          |                       |           |                  |           |
|-------------|----------|-----------------------|-----------|------------------|-----------|
| Source Type | ESI      | Ion Polarity          | Positive  | Set Nebulizer    | 1.2 Bar   |
| Focus       | Active   | Set Capillary         | 4500 V    | Set Dry Heater   | 200 °C    |
| Scan Begin  | 50 m/z   | Set End Plate Offset  | -500 V    | Set Dry Gas      | 6.0 l/min |
| Scan End    | 3000 m/z | Set Collision Cell RF | 130.0 Vpp | Set Divert Valve | Waste     |

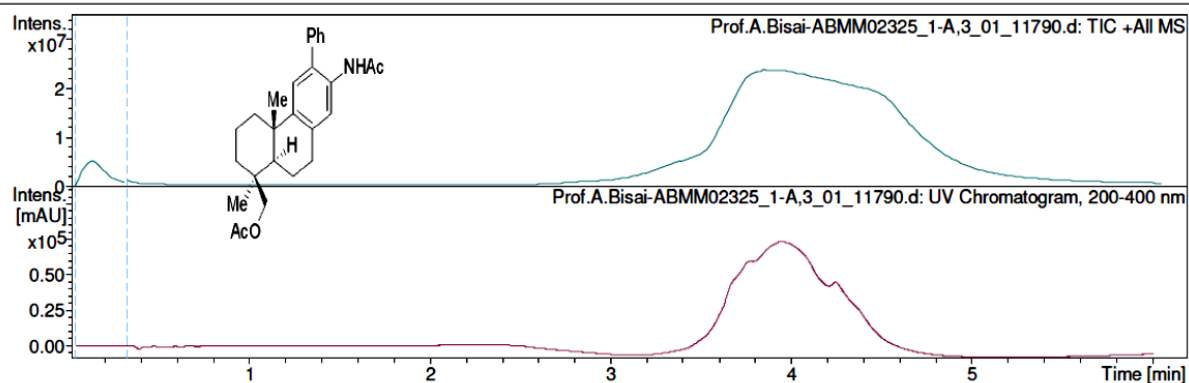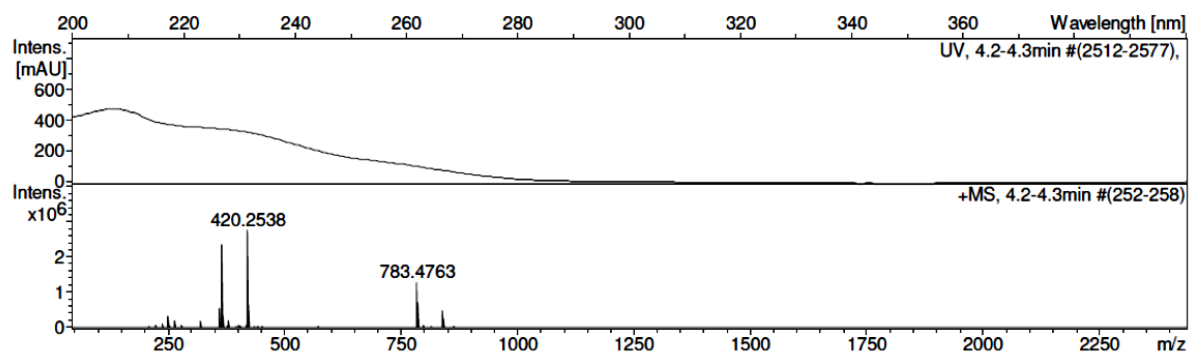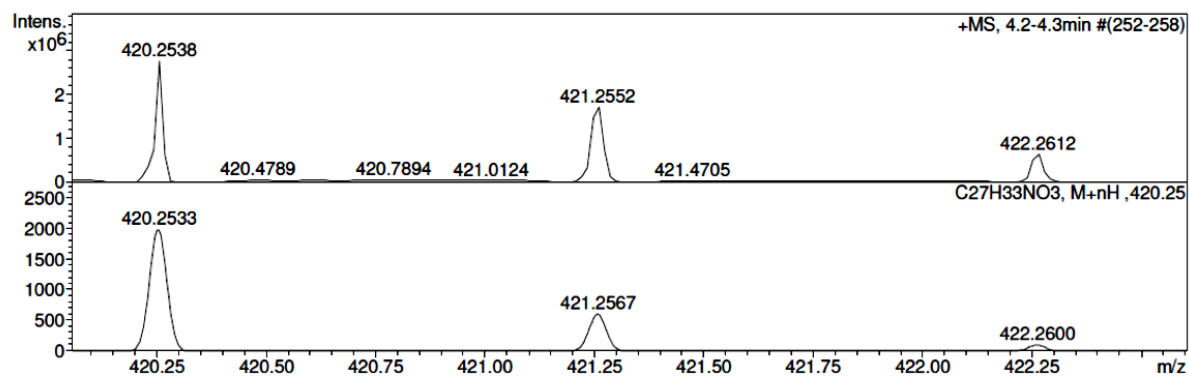

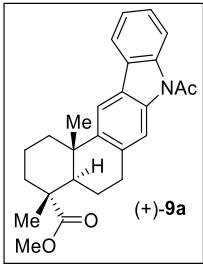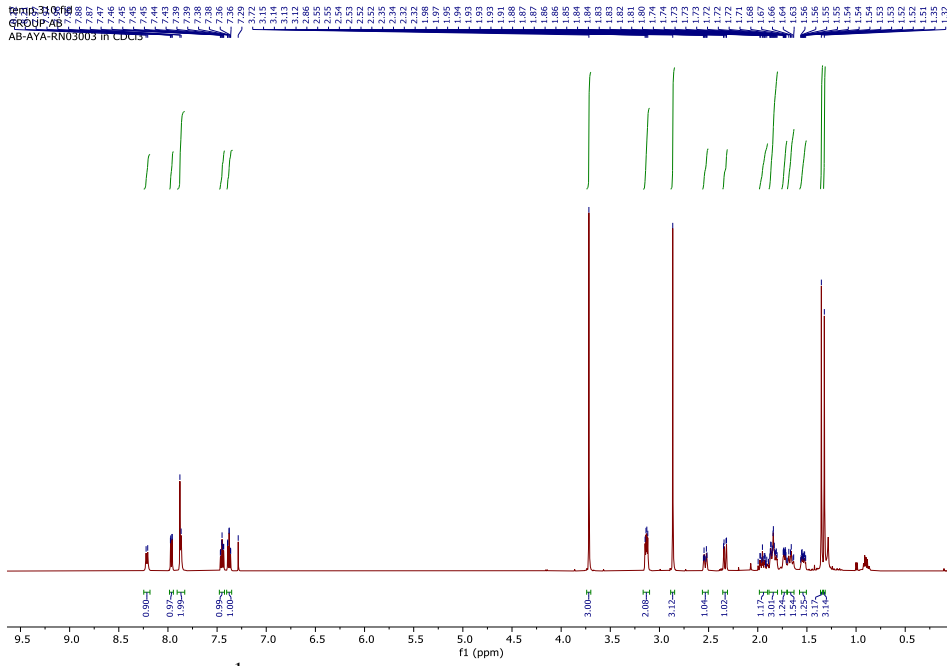

<sup>1</sup>H NMR (500 MHz, CDCl<sub>3</sub>) of (+)-9a

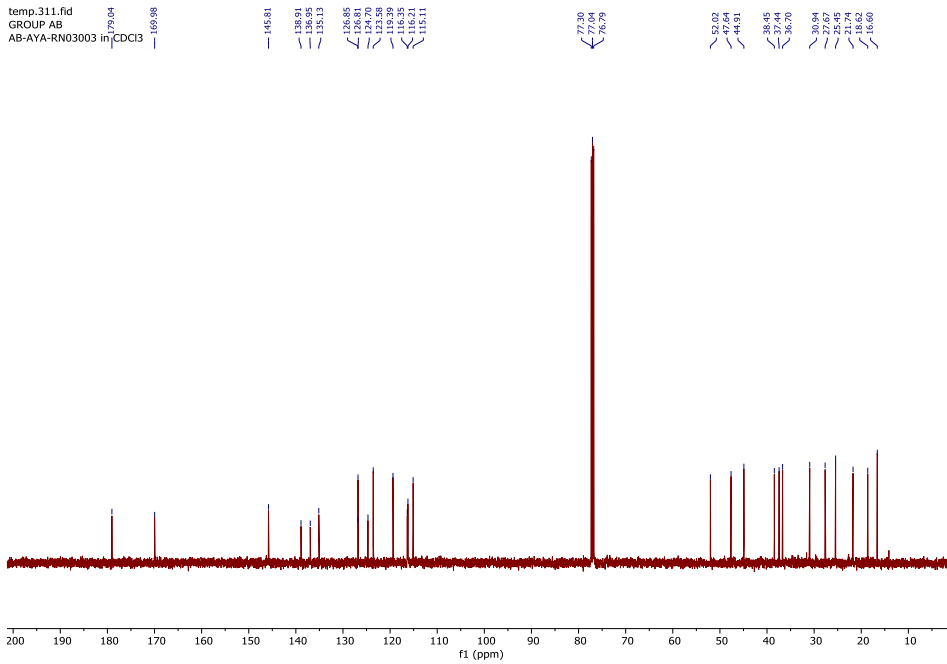

<sup>13</sup>C{<sup>1</sup>H} NMR (125 MHz, CDCl<sub>3</sub>) of (+)-9a



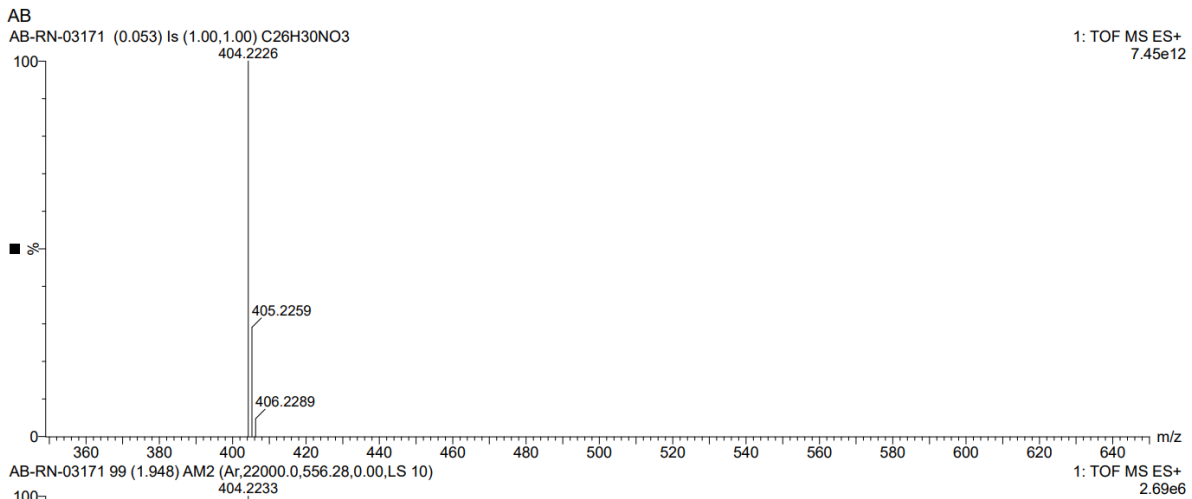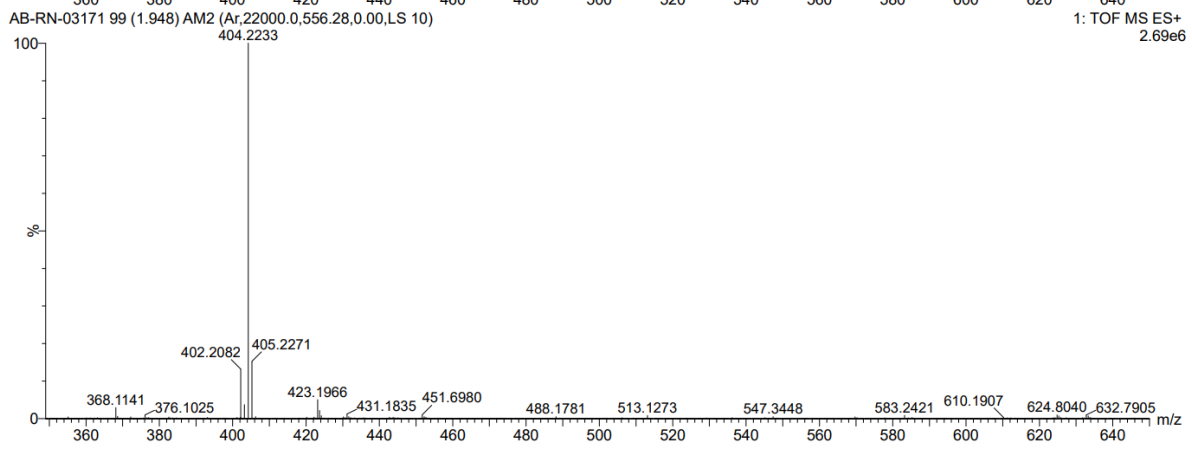

HRMS data of (+)-**9a**

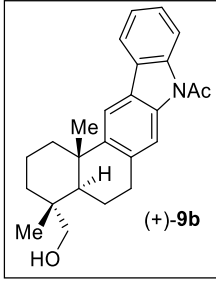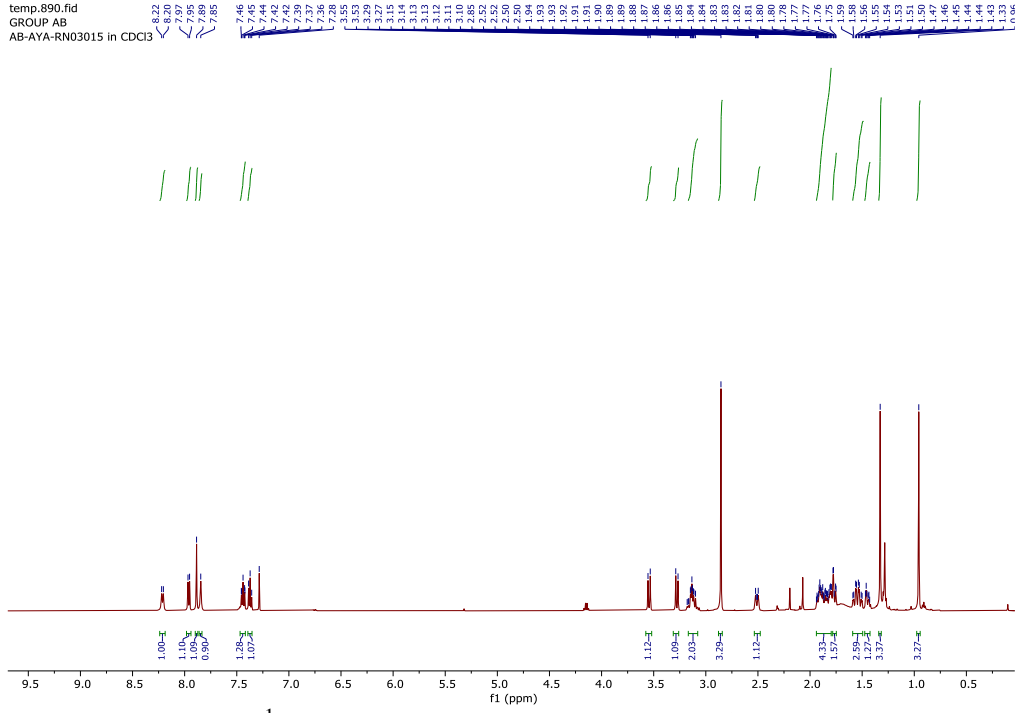

<sup>1</sup>H NMR (500 MHz, CDCl<sub>3</sub>) of (+)-**9b**

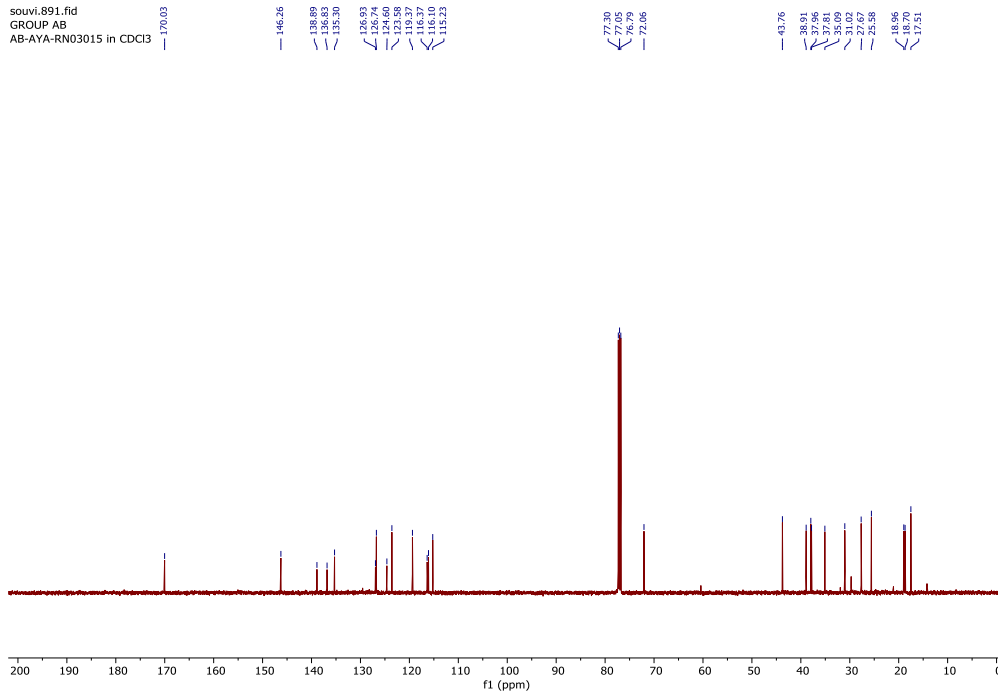

<sup>13</sup>C{<sup>1</sup>H} NMR (125 MHz, CDCl<sub>3</sub>) of (+)-**9b**

# Display Report

## Analysis Info

Analysis Name D:\Data\User data\2022\MAR\AB\_RN\_03015.d  
Method Tune\_pos\_Mid.m  
Sample Name AB\_RN\_03015  
Comment signal dropping issue

Acquisition Date 3/17/2022 7:56:10 PM  
Operator IISER Kolkata  
Instrument maXis impact 8282001.00127

## Acquisition Parameter

|             |          |                      |          |                  |           |
|-------------|----------|----------------------|----------|------------------|-----------|
| Source Type | ESI      | Ion Polarity         | Positive | Set Nebulizer    | 0.4 Bar   |
| Focus       | Active   | Set Capillary        | 3400 V   | Set Dry Heater   | 200 °C    |
| Scan Begin  | 50 m/z   | Set End Plate Offset | -500 V   | Set Dry Gas      | 4.0 l/min |
| Scan End    | 3000 m/z | Set Charging Voltage | 2000 V   | Set Divert Valve | Source    |
|             |          | Set Corona           | 0 nA     | Set APCI Heater  | 0 °C      |

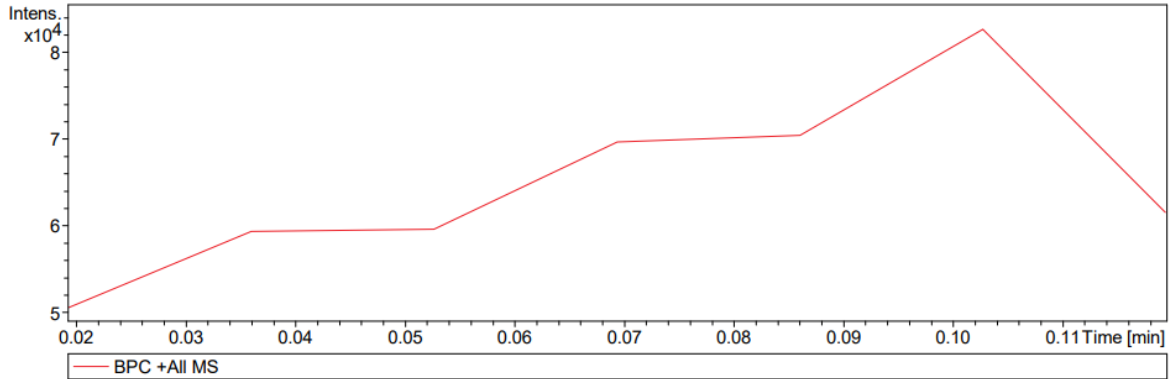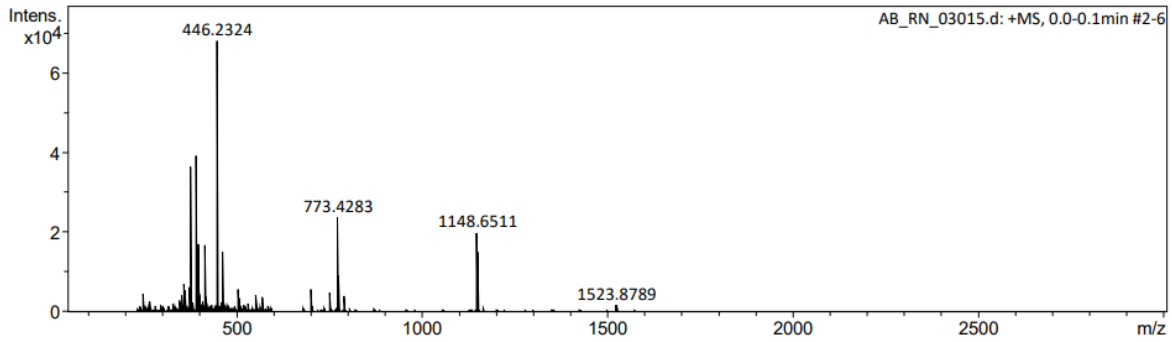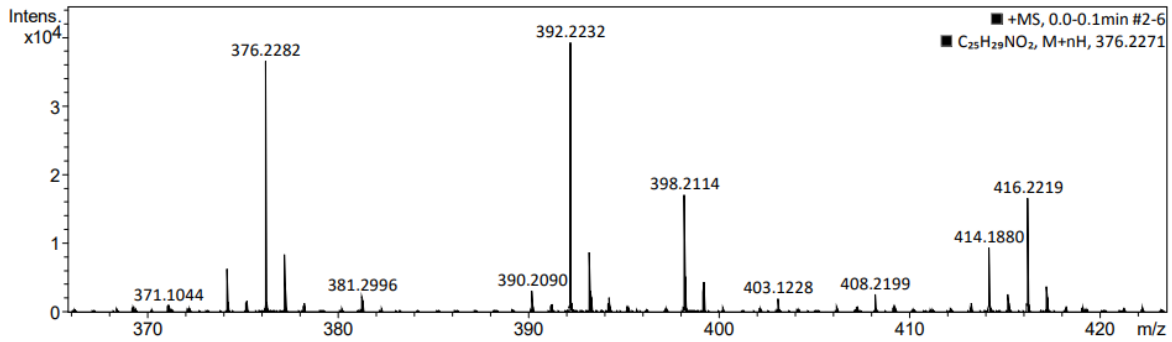

HRMS data of (+)-**9b**

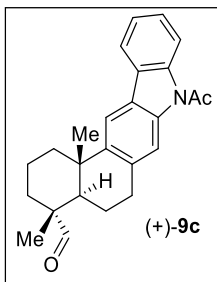

temp.390.fid  
GROUP AB  
AB-AYA-RN03035 in CDCl<sub>3</sub>

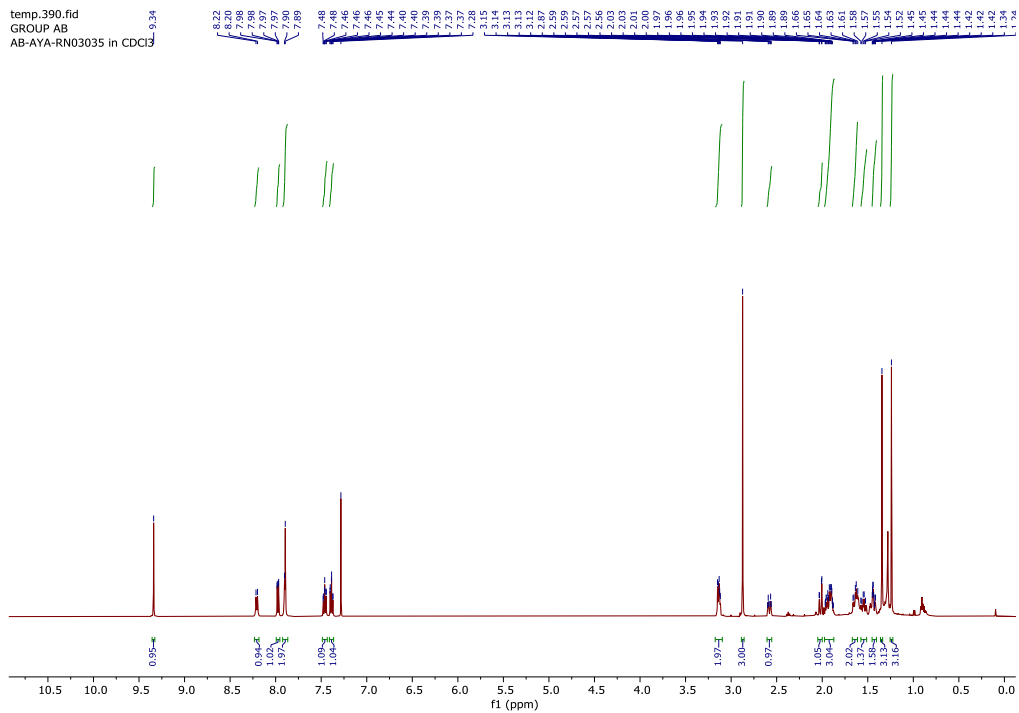

<sup>1</sup>H NMR (500 MHz, CDCl<sub>3</sub>) of (+)-**9c**

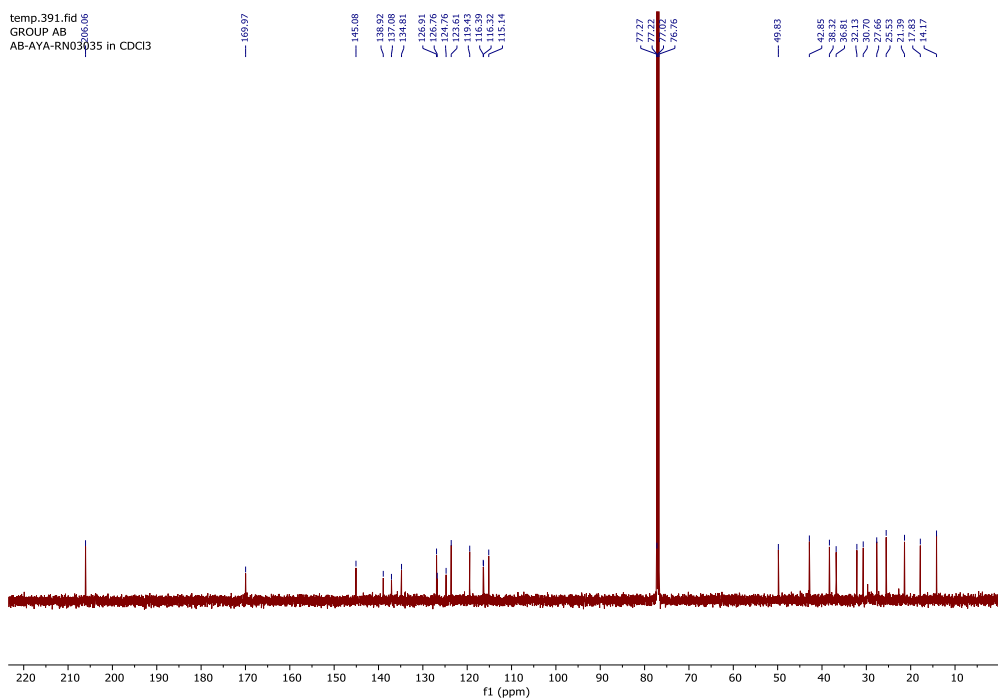

<sup>13</sup>C{<sup>1</sup>H} NMR (125 MHz, CDCl<sub>3</sub>) of (+)-**9c**

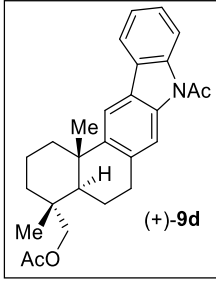

temp.910.fid  
GROUP AB  
AB-AYA-RN03018 in CDCl<sub>3</sub>

8.23  
8.11  
7.98  
7.96  
7.90  
7.85  
7.87  
7.45  
7.44  
7.38  
7.37  
7.28

4.03  
3.78  
3.76  
3.19  
3.18  
3.17  
3.16  
3.15  
3.14  
3.14  
3.08  
3.08  
3.06  
3.04  
3.03  
2.87  
2.55  
2.53  
2.52  
2.51  
2.07  
1.92  
1.92  
1.91  
1.91  
1.89  
1.89  
1.88  
1.87  
1.86  
1.85  
1.84  
1.84  
1.81  
1.81  
1.80  
1.79  
1.78  
1.78  
1.77  
1.77  
1.75  
1.75  
1.72  
1.60  
1.59  
1.57  
1.57  
1.54  
1.53  
1.51  
1.51  
1.44  
1.44  
1.02

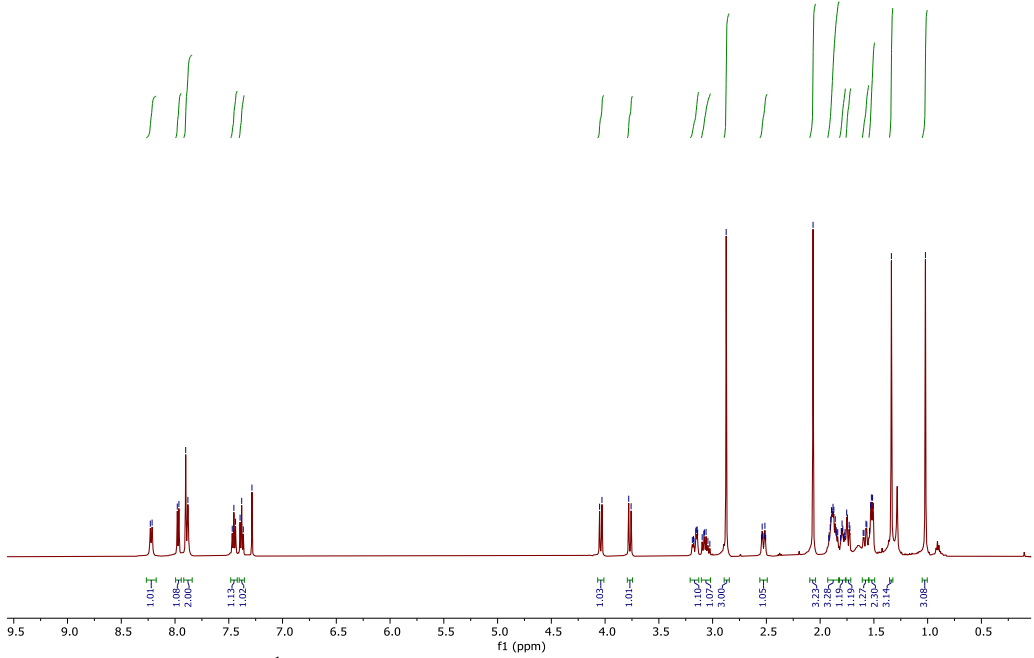

<sup>1</sup>H NMR (500 MHz, CDCl<sub>3</sub>) of (+)-9d

temp.911.fid  
GROUP AB  
AB-AYA-RN03018 in CDCl<sub>3</sub>

171.30  
169.26

146.08  
138.92  
136.89  
135.18  
126.86  
124.70  
124.69  
119.90  
116.37  
116.17  
115.26

77.30  
77.29  
77.25

44.27  
38.84  
37.89  
36.87  
31.09  
27.67  
25.60  
19.11  
18.58  
17.55

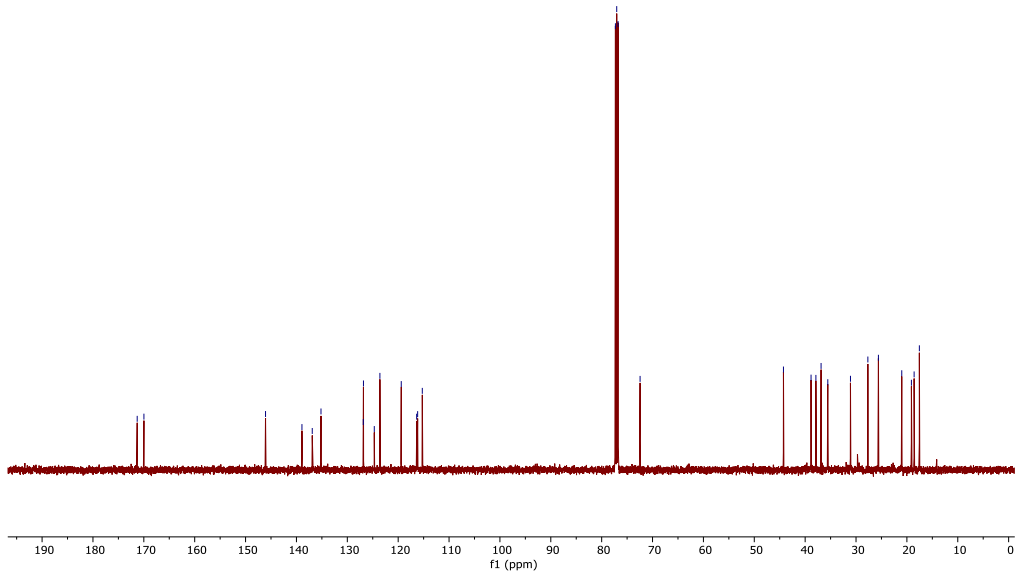

<sup>13</sup>C{<sup>1</sup>H} NMR (125 MHz, CDCl<sub>3</sub>) of (+)-9d

# Display Report

## Analysis Info

Analysis Name D:\Data\User data\2022\MAR\lab\_m\_03018.d  
Method Tune\_pos\_Standard.m  
Sample Name ab\_m\_03018  
Comment signal dropping issue

Acquisition Date 3/21/2022 11:56:58 AM

Operator IISER Kolkata  
Instrument maXis impact 8282001.00127

## Acquisition Parameter

|             |          |                      |          |                  |           |
|-------------|----------|----------------------|----------|------------------|-----------|
| Source Type | ESI      | Ion Polarity         | Positive | Set Nebulizer    | 0.5 Bar   |
| Focus       | Active   | Set Capillary        | 3400 V   | Set Dry Heater   | 200 °C    |
| Scan Begin  | 50 m/z   | Set End Plate Offset | -500 V   | Set Dry Gas      | 4.0 l/min |
| Scan End    | 1000 m/z | Set Charging Voltage | 2000 V   | Set Divert Valve | Source    |
|             |          | Set Corona           | 0 nA     | Set APCI Heater  | 0 °C      |

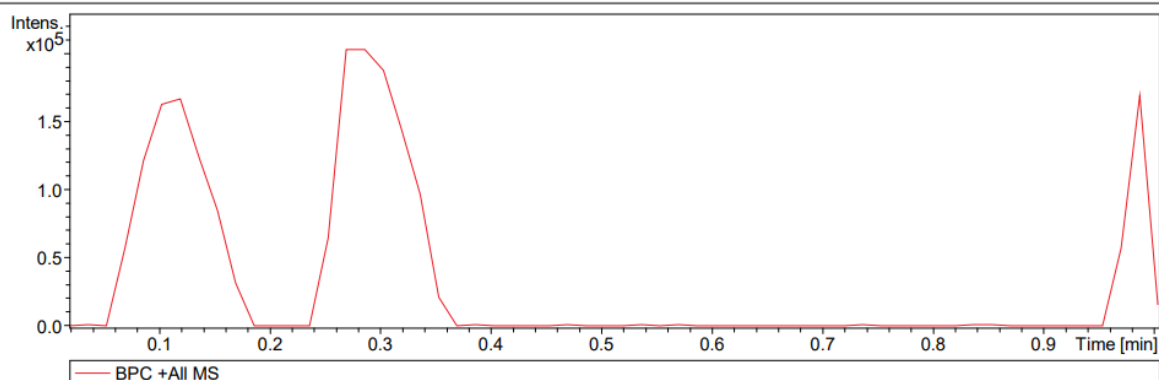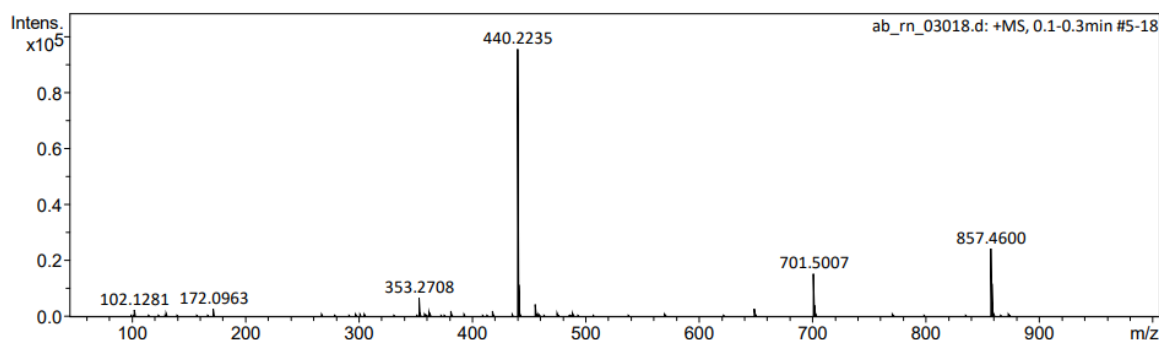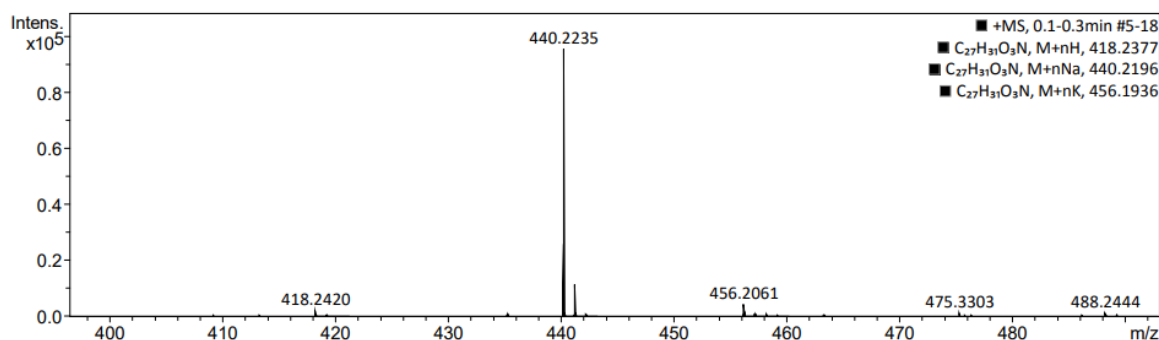

ab\_m\_03018.d

Bruker Compass DataAnalysis 4.1

printed: 3/21/2022 12:05:16 PM

by: IISER Kolkata

Page 1 of 1

HRMS data of (+)-**9d**

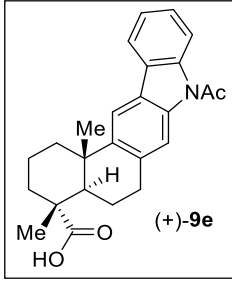

temp.740.fid  
GROUP AB  
AB-AYA-RN03040R in CDCl<sub>3</sub>

8.22  
7.97  
7.97  
7.88  
7.87  
7.66  
7.67  
7.45  
7.44  
7.40  
7.38  
7.36  
7.29  
7.28

3.18  
3.15  
2.87  
2.56  
2.56  
2.36  
2.33  
2.33  
2.01  
1.99  
1.97  
1.91  
1.91  
1.88  
1.85  
1.81  
1.80  
1.70  
1.67  
1.65  
1.34

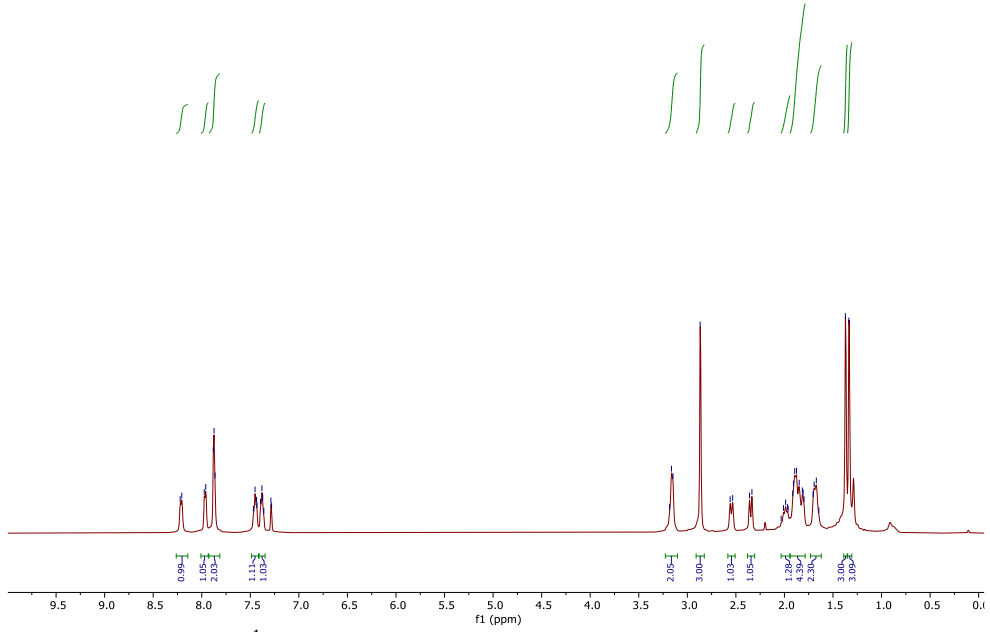

temp.741.fid  
GROUP AB  
AB-AYA-RN03040R in CDCl<sub>3</sub>

170.03  
145.68  
138.92  
136.97  
135.10  
126.85  
126.82  
126.66  
123.72  
119.39  
116.36  
115.40  
77.28  
77.03  
76.78  
47.38  
44.65  
38.39  
37.36  
36.78  
30.03  
27.64  
25.45  
18.90  
15.34

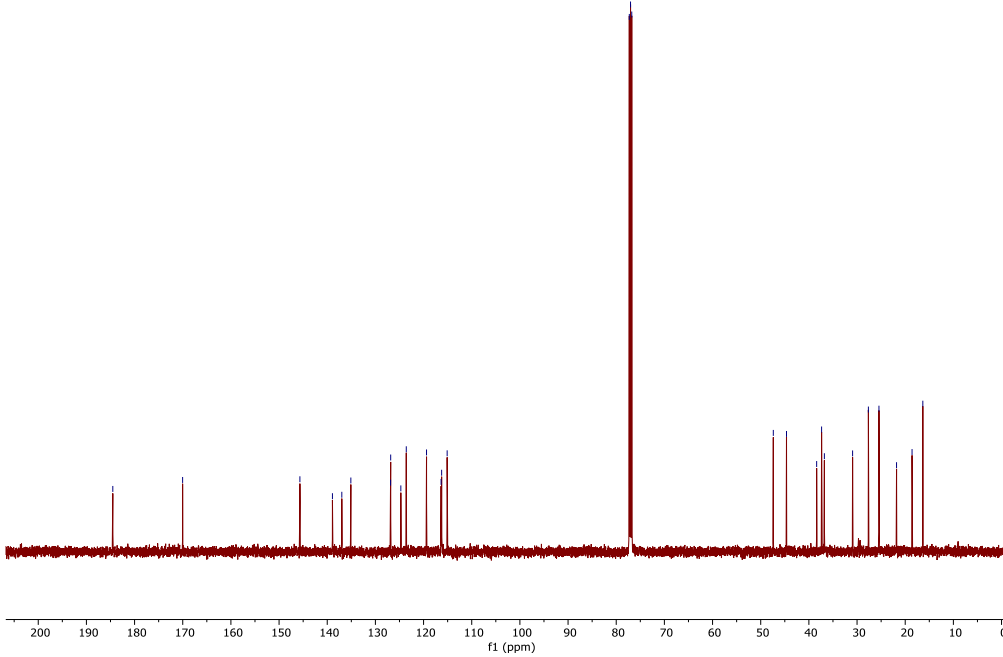

# Display Report

## Analysis Info

Analysis Name D:\Data\User data\2022\APRIL\lab\_rn\_03040r.d  
Method Tune\_pos\_Standard.m  
Sample Name AB\_RN\_03040r  
Comment

Acquisition Date 4/18/2022 12:59:53 PM

Operator IISER Kolkata  
Instrument maXis impact 8282001.00127

## Acquisition Parameter

|             |          |                      |          |                  |           |
|-------------|----------|----------------------|----------|------------------|-----------|
| Source Type | ESI      | Ion Polarity         | Positive | Set Nebulizer    | 0.5 Bar   |
| Focus       | Active   | Set Capillary        | 3400 V   | Set Dry Heater   | 200 °C    |
| Scan Begin  | 50 m/z   | Set End Plate Offset | -500 V   | Set Dry Gas      | 4.0 l/min |
| Scan End    | 1000 m/z | Set Charging Voltage | 2000 V   | Set Divert Valve | Source    |
|             |          | Set Corona           | 0 nA     | Set APCI Heater  | 0 °C      |

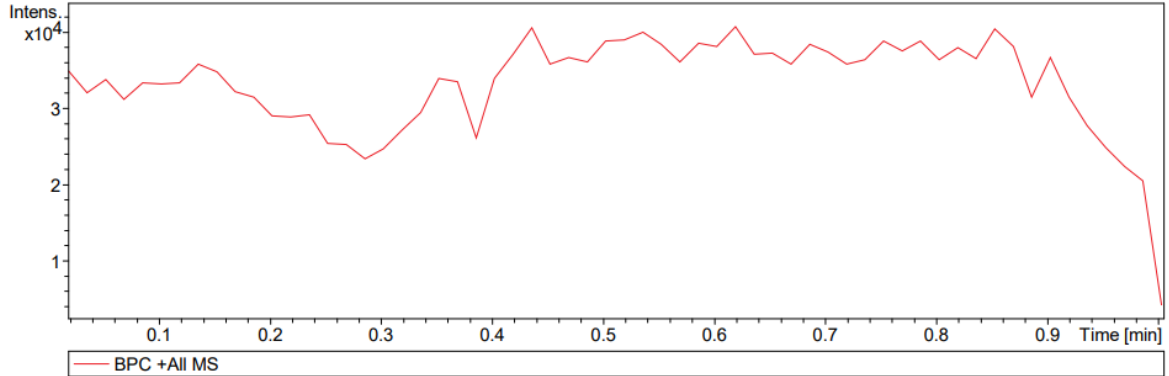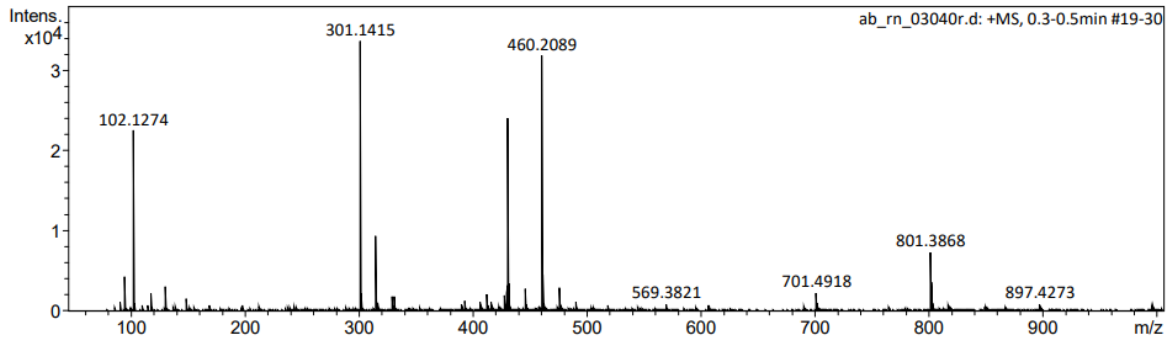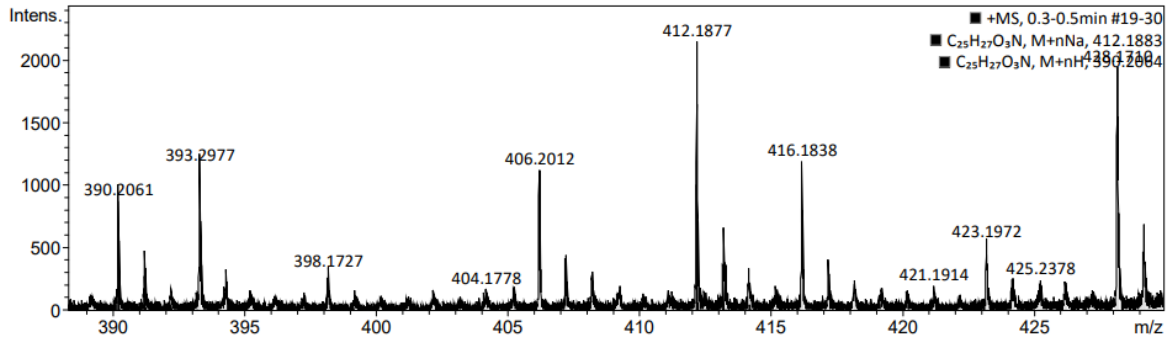

ab\_rn\_03040r.d

Bruker Compass DataAnalysis 4.1

printed: 4/18/2022 1:02:34 PM

by: IISER Kolkata

Page 1 of 1

HRMS data of (+)-**9e**



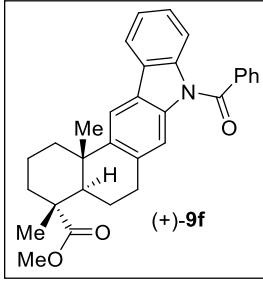

temp.920.fid  
GROUP AB  
AB-AYA-RN03029 in CDCl<sub>3</sub>

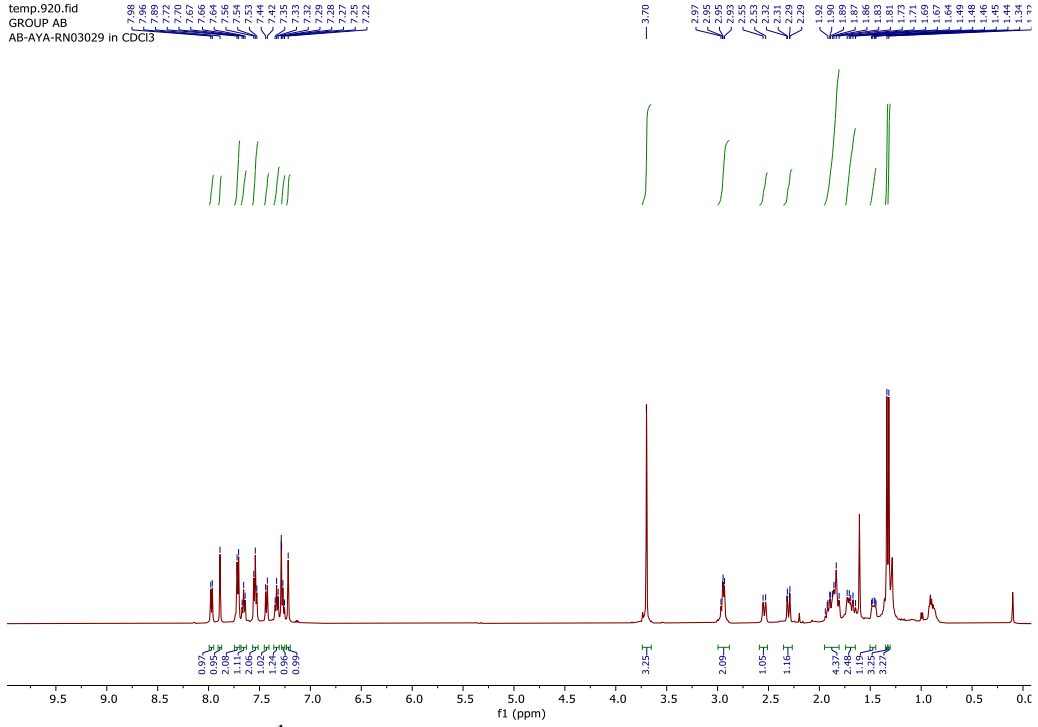

<sup>1</sup>H NMR (500 MHz, CDCl<sub>3</sub>) of (+)-**9f**

mnova.921.fid  
GROUP AB  
AB-AYA-RN03029 in CDCl<sub>3</sub>

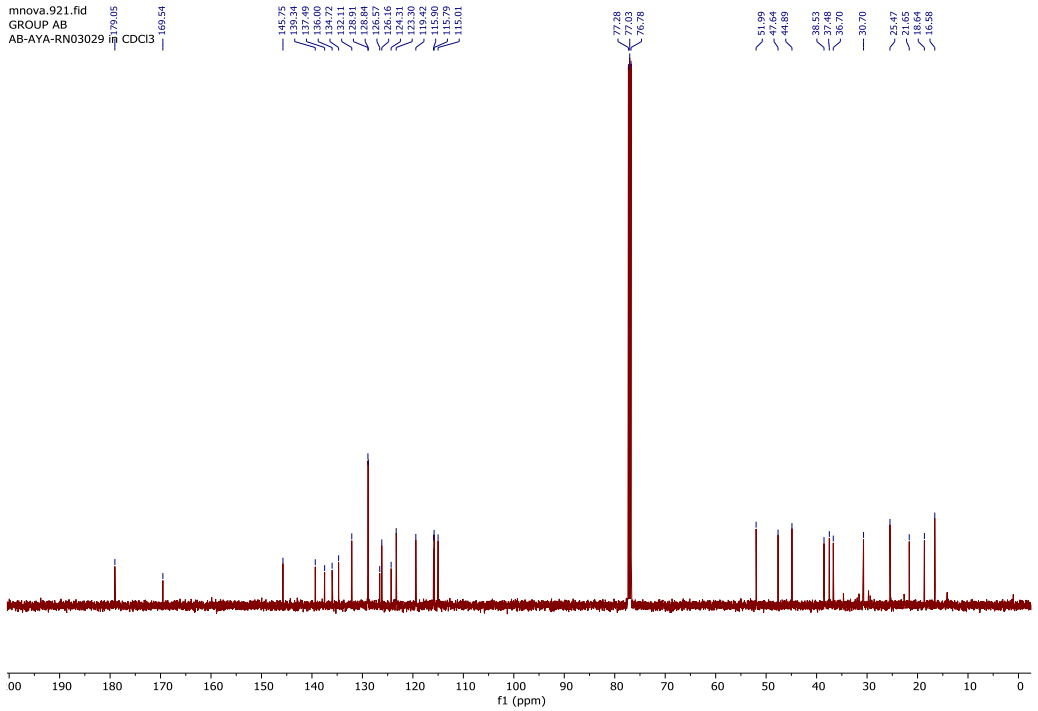

<sup>13</sup>C{<sup>1</sup>H} NMR (125 MHz, CDCl<sub>3</sub>) of (+)-**9f**

# Display Report

## Analysis Info

Analysis Name D:\Data\User data\2022\MAR\AB\_RN\_03029R.d  
Method Tune\_pos\_Standard.m  
Sample Name ab\_m\_03029R  
Comment

Acquisition Date 3/31/2022 12:30:12 PM

Operator IISER Kolkata  
Instrument maXis impact 8282001.00127

## Acquisition Parameter

|             |          |                      |          |                  |           |
|-------------|----------|----------------------|----------|------------------|-----------|
| Source Type | ESI      | Ion Polarity         | Positive | Set Nebulizer    | 0.5 Bar   |
| Focus       | Active   | Set Capillary        | 3400 V   | Set Dry Heater   | 200 °C    |
| Scan Begin  | 50 m/z   | Set End Plate Offset | -500 V   | Set Dry Gas      | 4.0 l/min |
| Scan End    | 1000 m/z | Set Charging Voltage | 2000 V   | Set Divert Valve | Source    |
|             |          | Set Corona           | 0 nA     | Set APCI Heater  | 0 °C      |

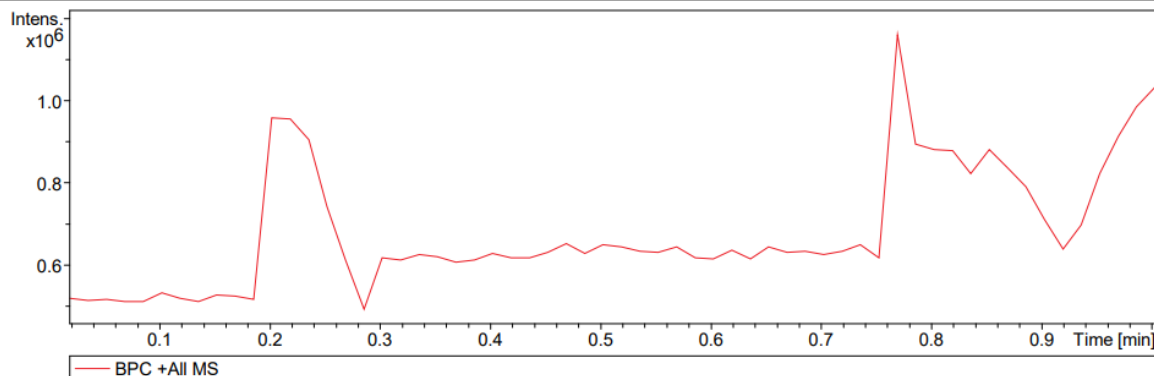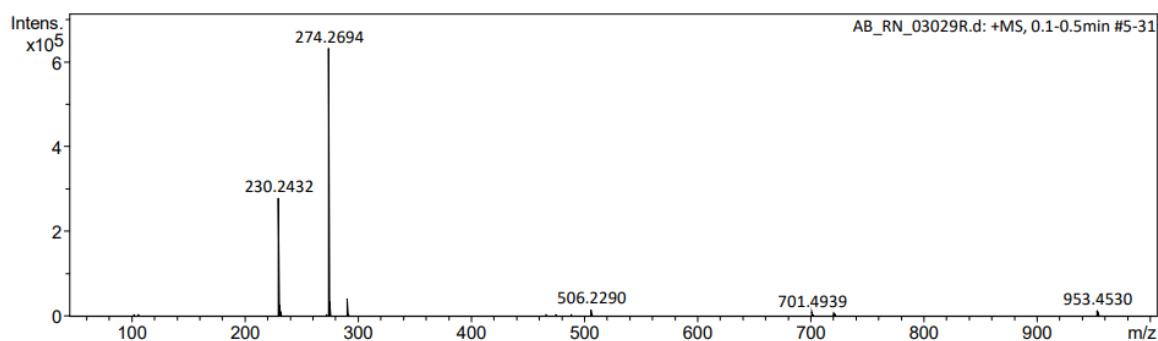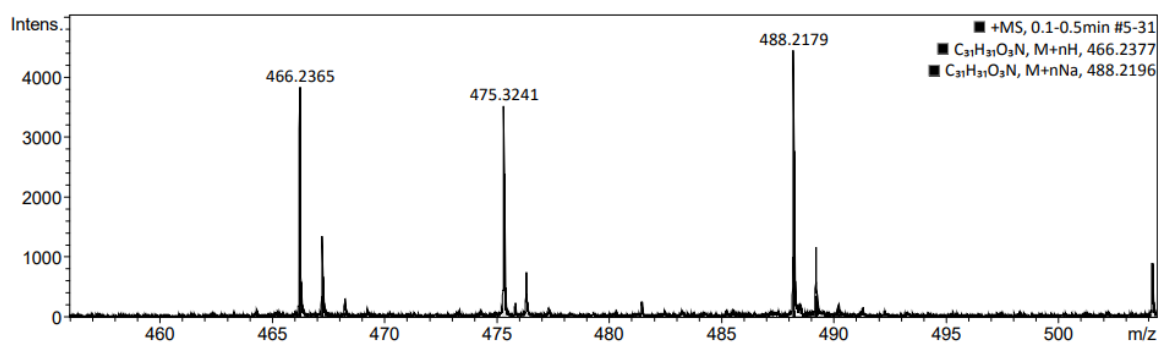

AB\_RN\_03029R.d

Bruker Compass DataAnalysis 4.1

printed: 3/31/2022 12:34:35 PM

by: IISER Kolkata

Page 1 of 1

HRMS data of (+)-**9f**

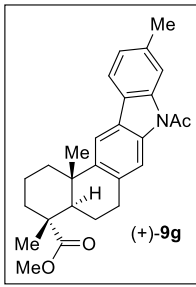

temp.420.fid  
GROUP AB  
AB-AYA-RN392 in CDCl<sub>3</sub>

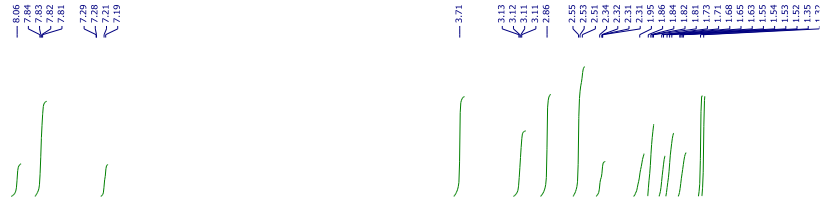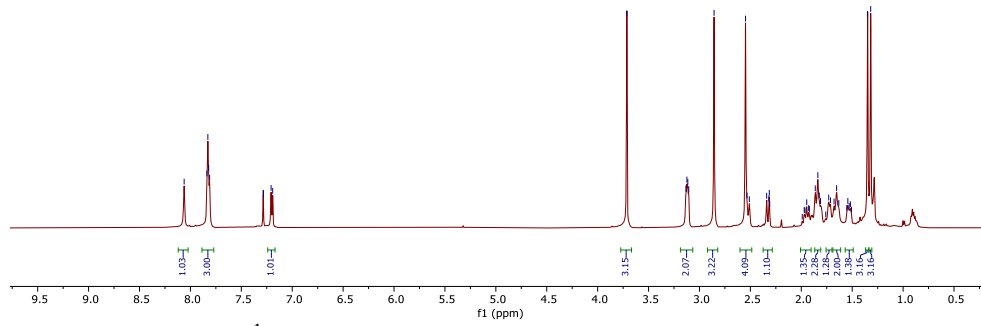

<sup>1</sup>H NMR (500 MHz, CDCl<sub>3</sub>) of (+)-**9g**

temp.421.fid  
GROUP AB  
AB-AYA-RN392 in CDCl<sub>3</sub>

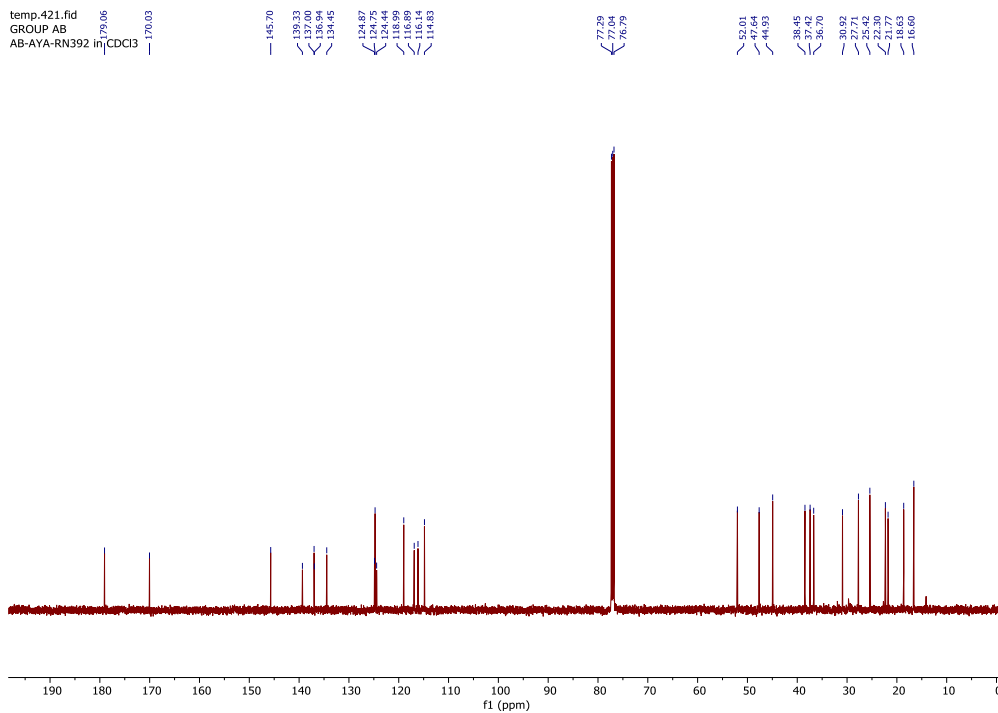

<sup>13</sup>C{<sup>1</sup>H} NMR (125 MHz, CDCl<sub>3</sub>) of (+)-**9g**

# Display Report

## Analysis Info

Analysis Name D:\Data\User data\2022\MAR\lab\_m\_0392.d  
Method Tune\_pos\_Standard.m  
Sample Name ab\_m\_0392  
Comment signal dropping issue

Acquisition Date 3/16/2022 11:30:47 AM

Operator IISER Kolkata  
Instrument maXis impact 8282001.00127

## Acquisition Parameter

|             |          |                      |          |                  |           |
|-------------|----------|----------------------|----------|------------------|-----------|
| Source Type | ESI      | Ion Polarity         | Positive | Set Nebulizer    | 0.5 Bar   |
| Focus       | Active   | Set Capillary        | 3400 V   | Set Dry Heater   | 200 °C    |
| Scan Begin  | 50 m/z   | Set End Plate Offset | -500 V   | Set Dry Gas      | 4.0 l/min |
| Scan End    | 1000 m/z | Set Charging Voltage | 2000 V   | Set Divert Valve | Source    |
|             |          | Set Corona           | 0 nA     | Set APCI Heater  | 0 °C      |

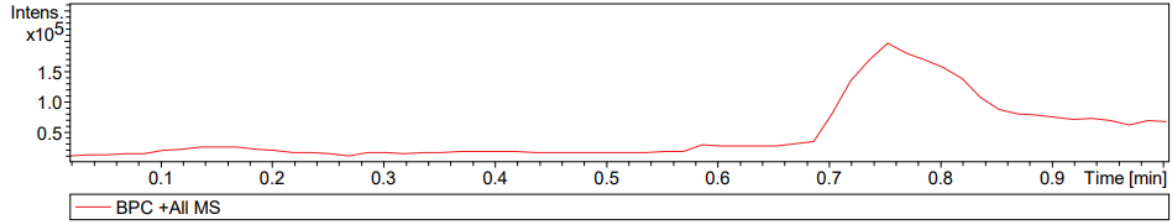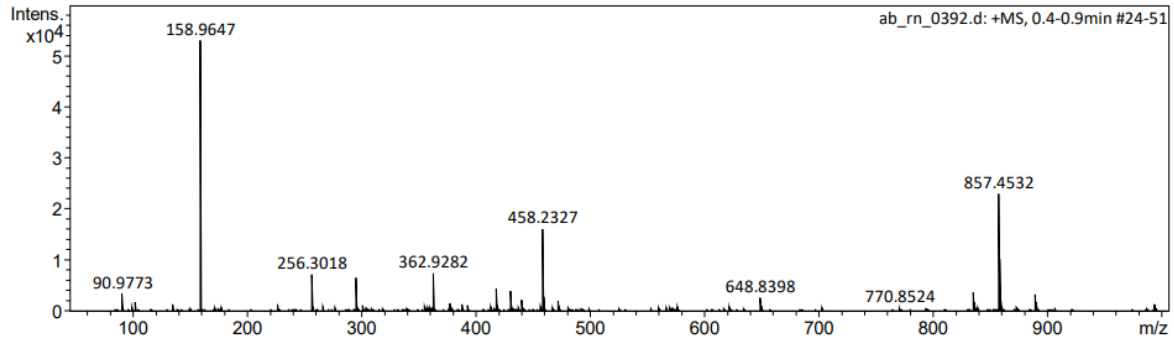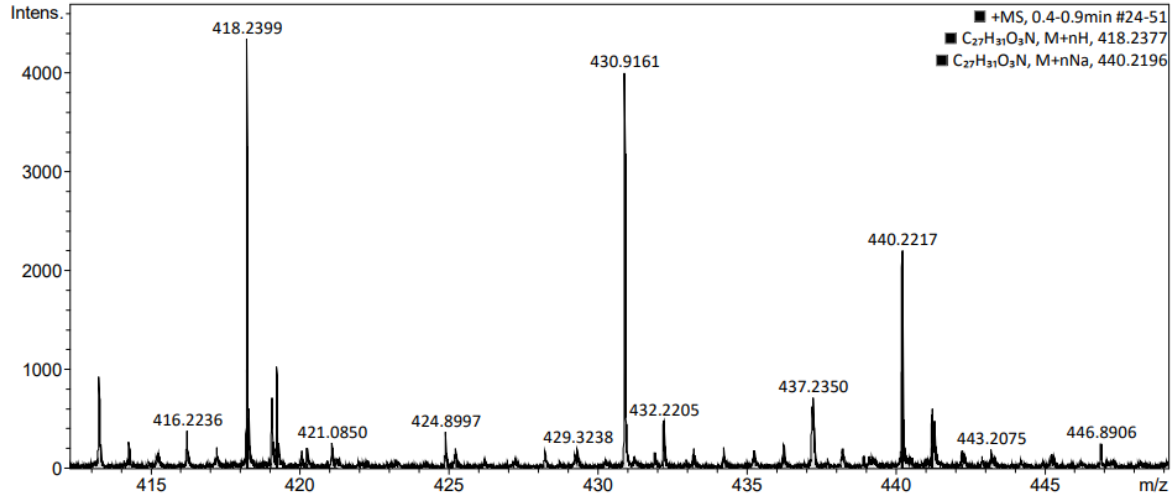

ab\_m\_0392.d

Bruker Compass DataAnalysis 4.1

printed: 3/16/2022 11:35:34 AM

by: IISER Kolkata

Page 1 of 1

HRMS data of (+)-**9g**

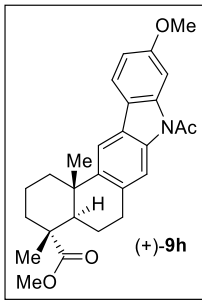

AB-SOV-0207  
AB

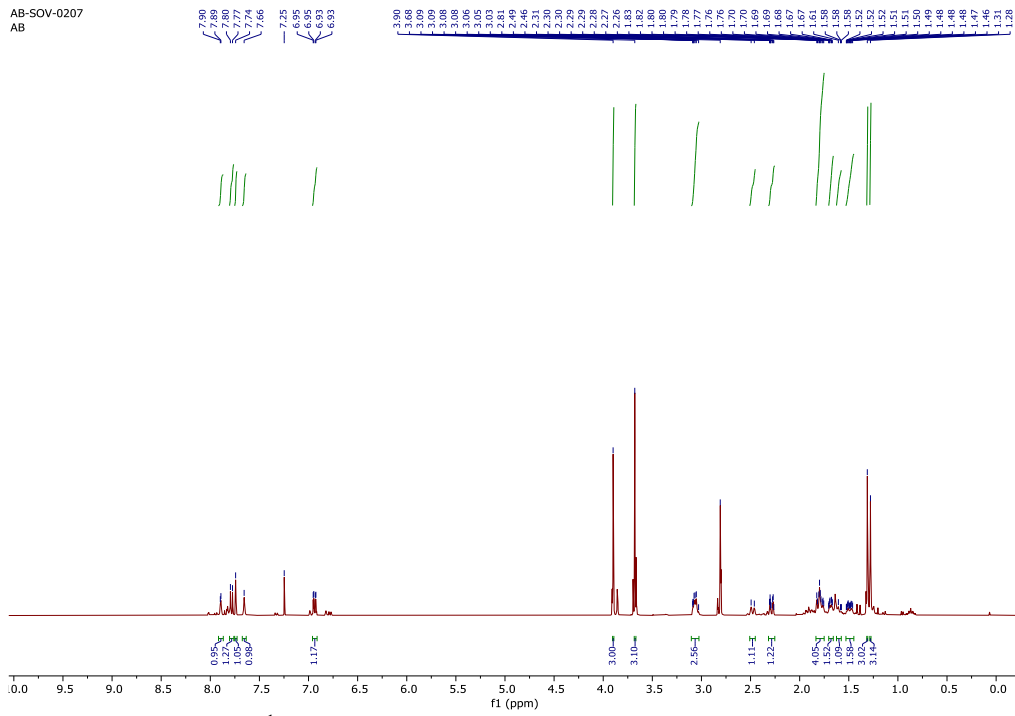

AB-SOV-0207 1  
AB

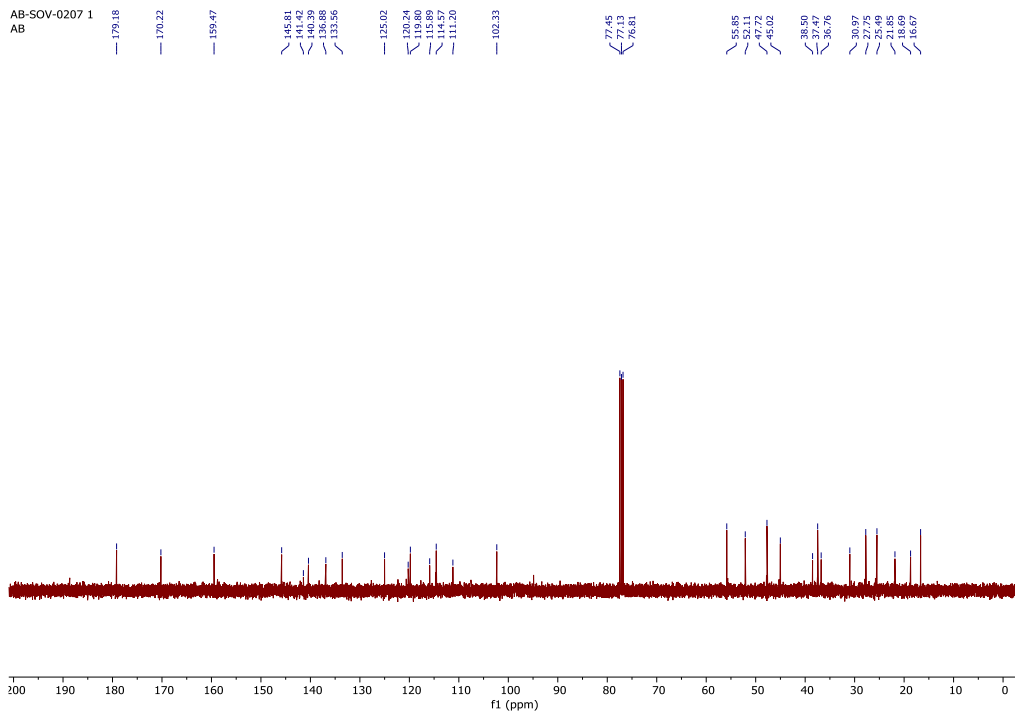

AB28-Mar-2024 12:41:02

AB-SOV-0207 (0.053) Is (1.00,1.00) C27H32NO4

IISER - KOLKATA

1: TOF MS ES+  
7.35e12

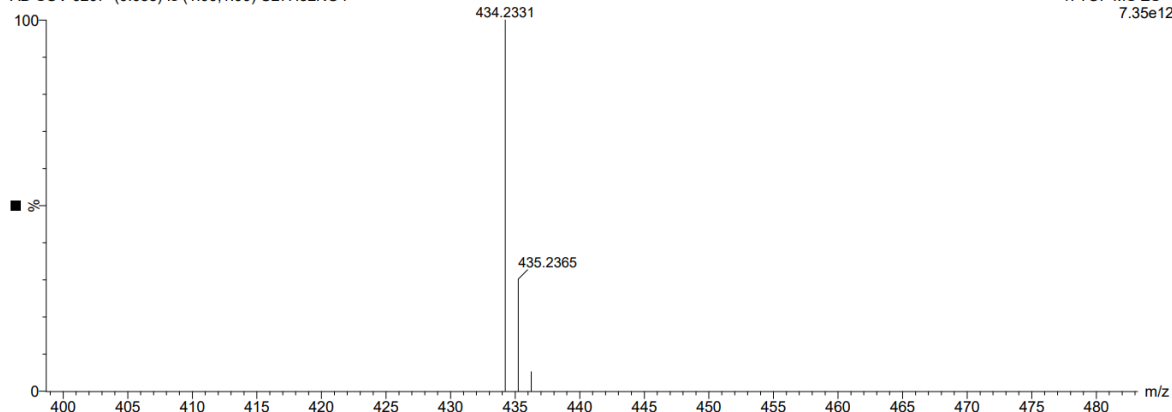

AB-SOV-0207 4 (0.104) AM2 (Ar,22000.0,556.28,0.00,LS 10); ABS

1: TOF MS ES+  
1.29e7

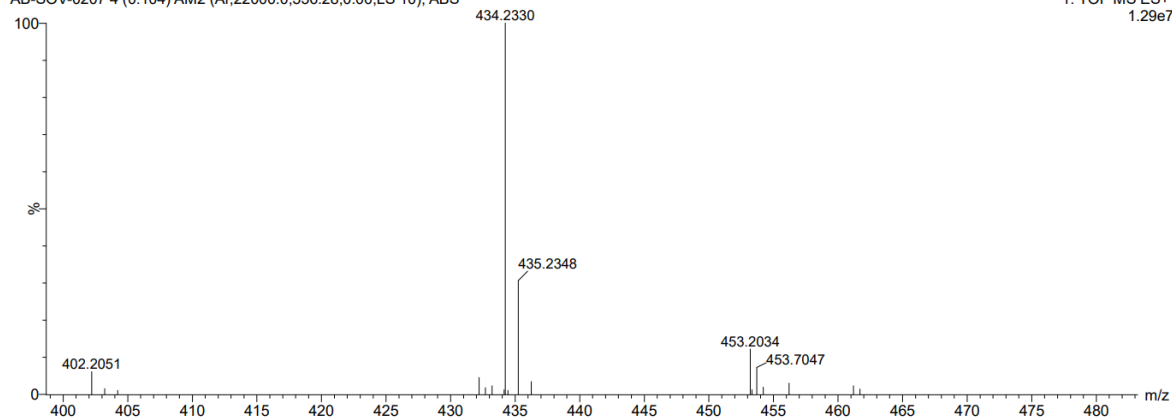

HRMS data of (+)-**9h**

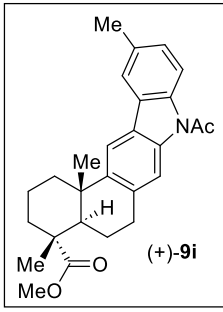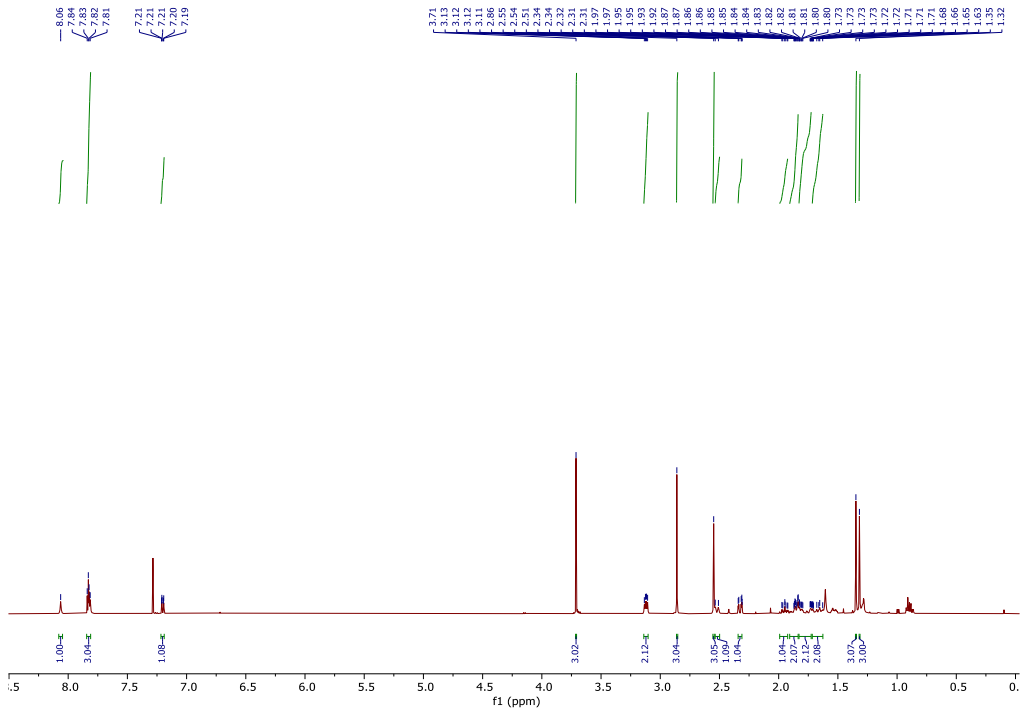

$^1\text{H NMR}$  (500 MHz,  $\text{CDCl}_3$ ) Data of (+)-9i

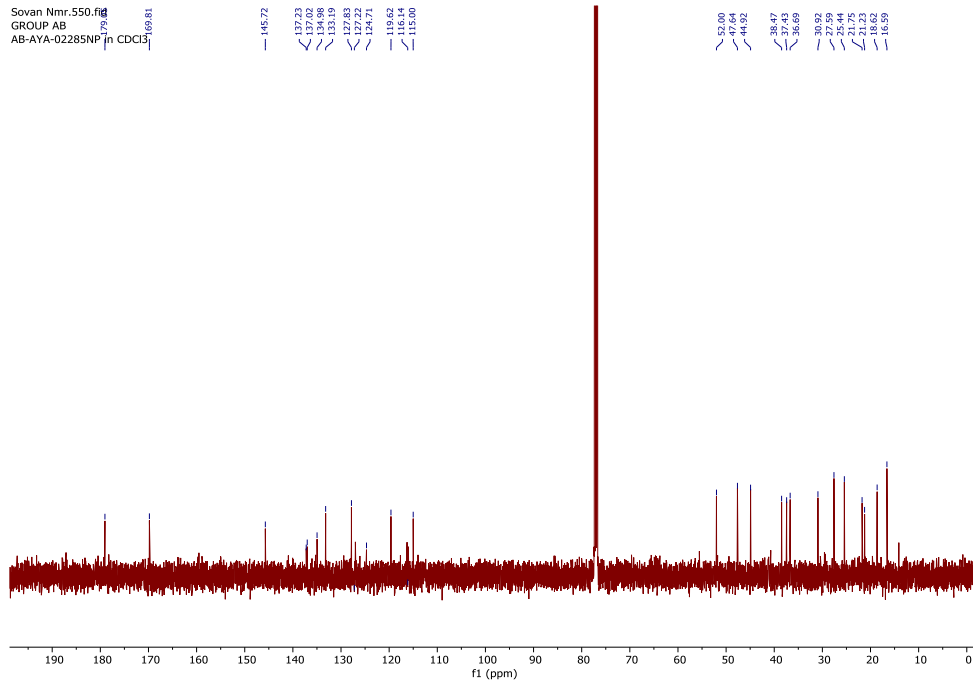

$^{13}\text{C}\{^1\text{H}\}$  NMR (125 MHz,  $\text{CDCl}_3$ ) of (+)-9i

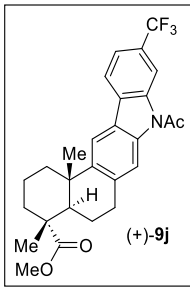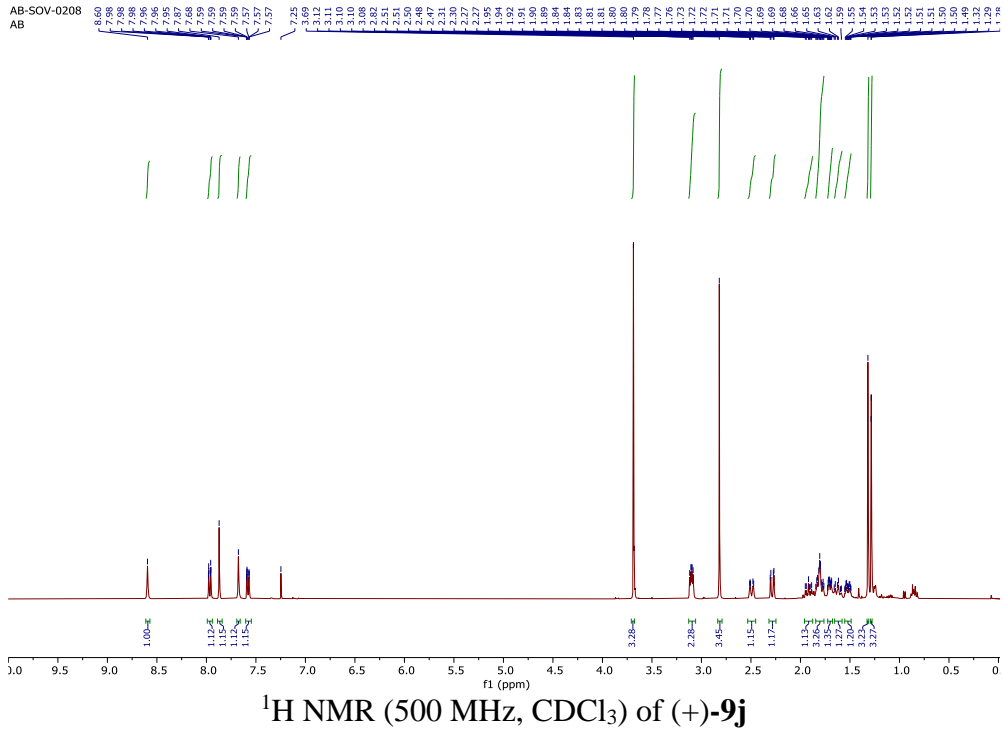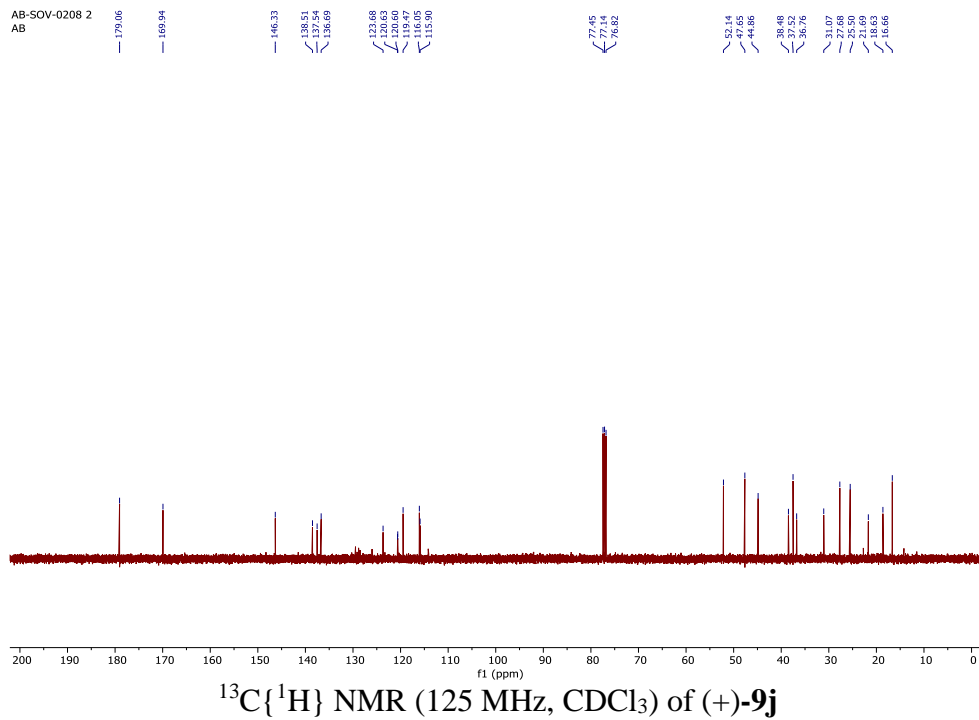



AB-SOV-02012  
1D 19F experiment

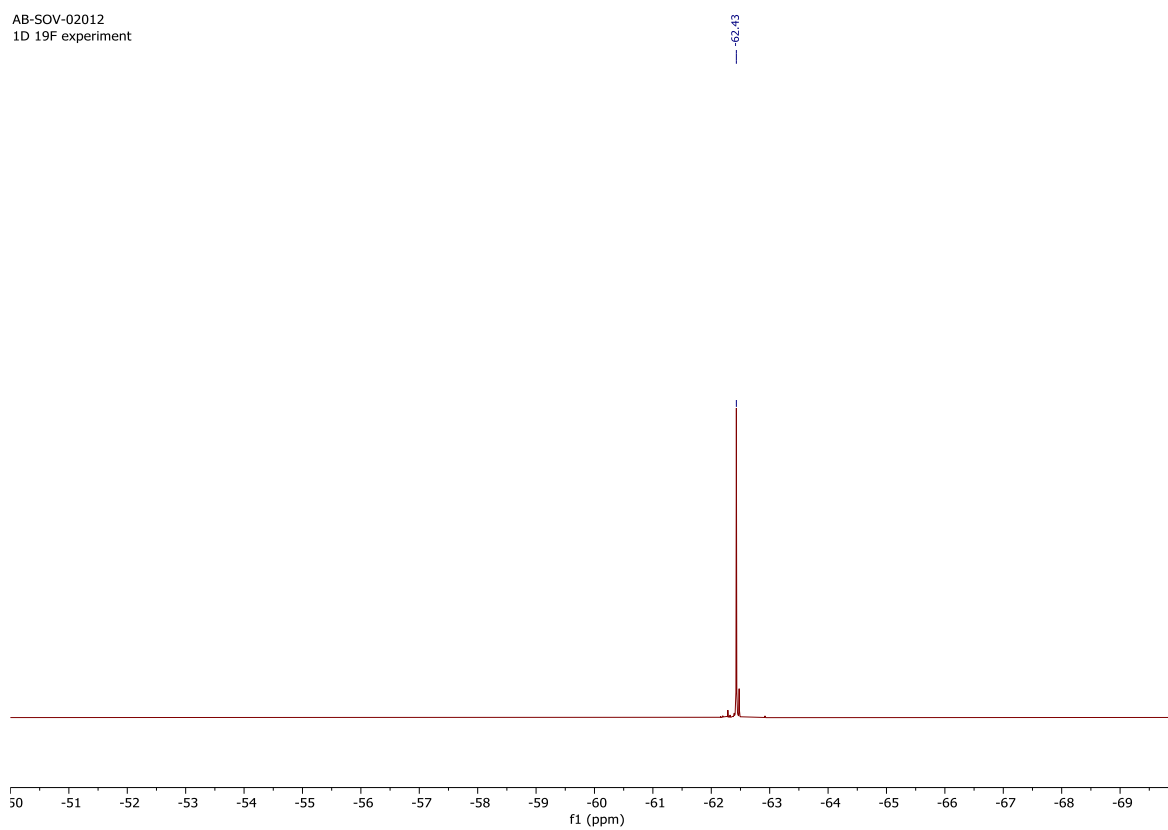

$^{19}\text{F}\{^1\text{H}\}$  NMR (376 MHz,  $\text{CDCl}_3$ ) of compound (+)-**9j**

AB28-Mar-2024 12:42:39  
AB-SOV-0208 (0.053) Is (1.00,1.00) C27H29F3NO3

IISER - KOLKATA

1: TOF MS ES+  
7.37e12

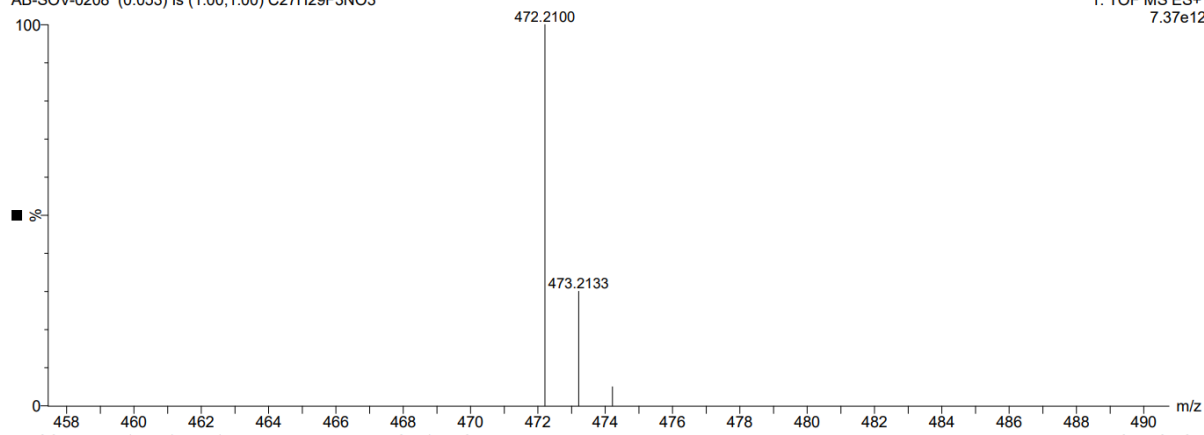

AB-SOV-0208 4 (0.104) AM2 (Ar,22000.0,556.28,0.00,LS 10); ABS

1: TOF MS ES+  
5.71e6

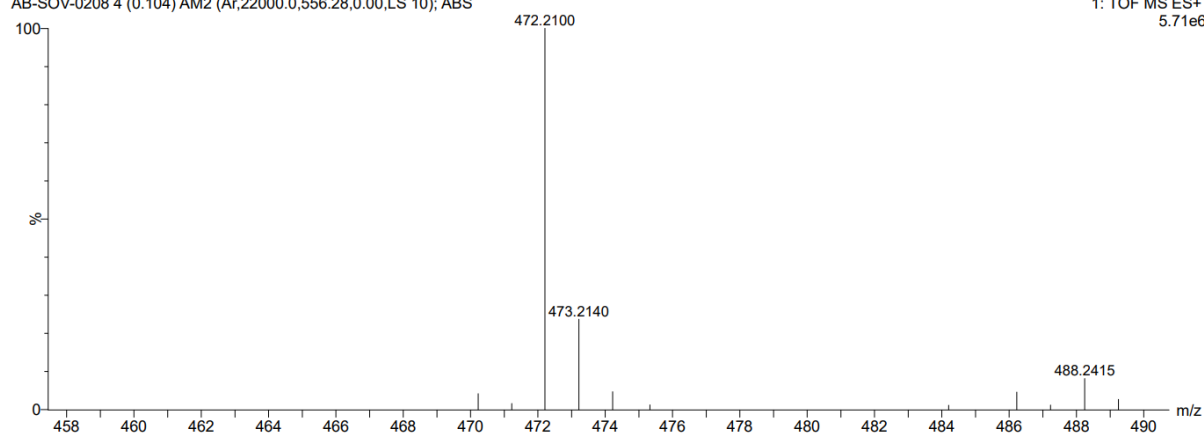

HRMS data of (+)-**9j**

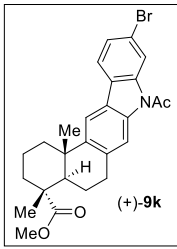

AB-SVK-SSK-0101  
AB

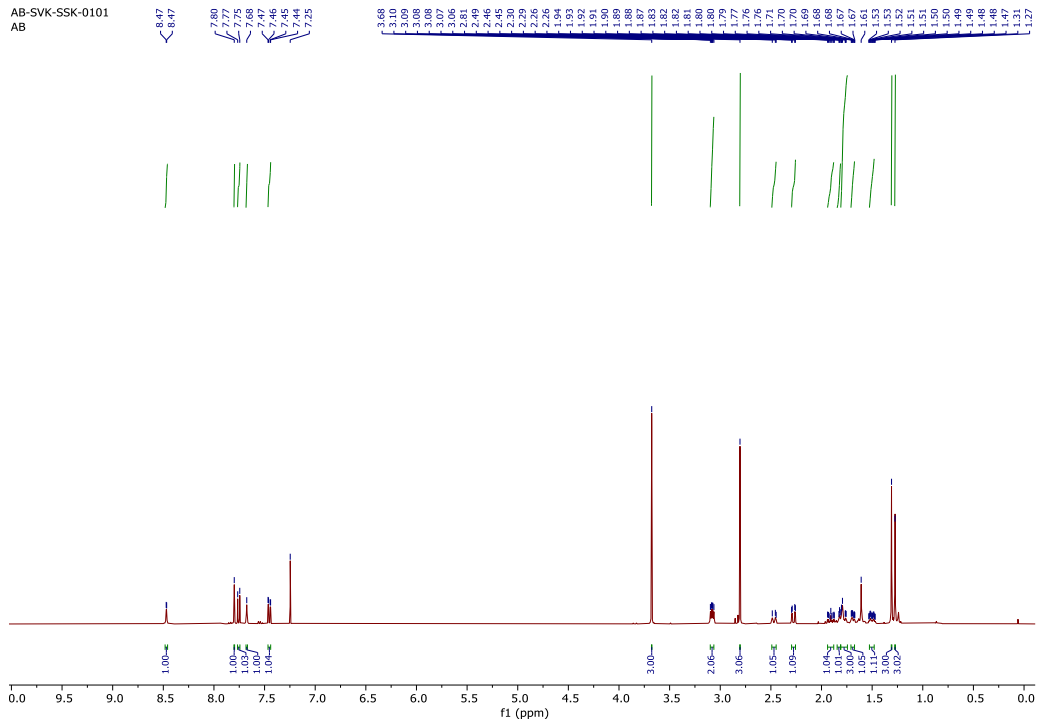

<sup>1</sup>H NMR (500 MHz, CDCl<sub>3</sub>) data of (+)-**9k**

SSG-SSD-B56  
SSG

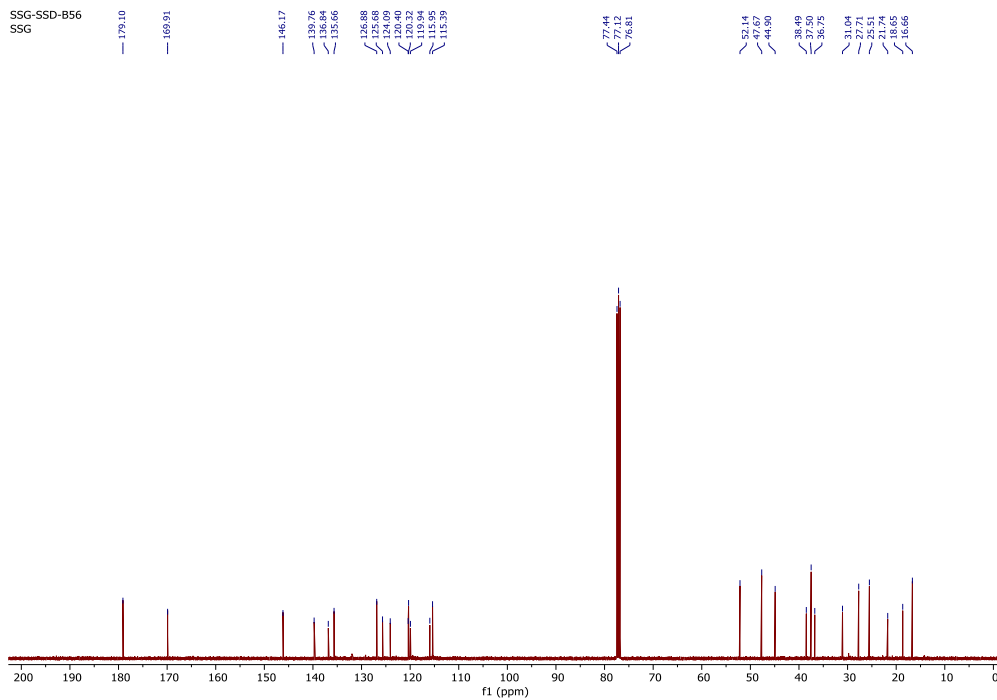

<sup>13</sup>C{<sup>1</sup>H} NMR (126 MHz, CDCl<sub>3</sub>) data of (+)-**9k**

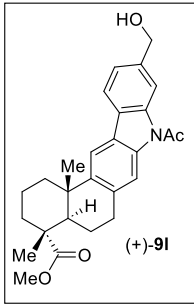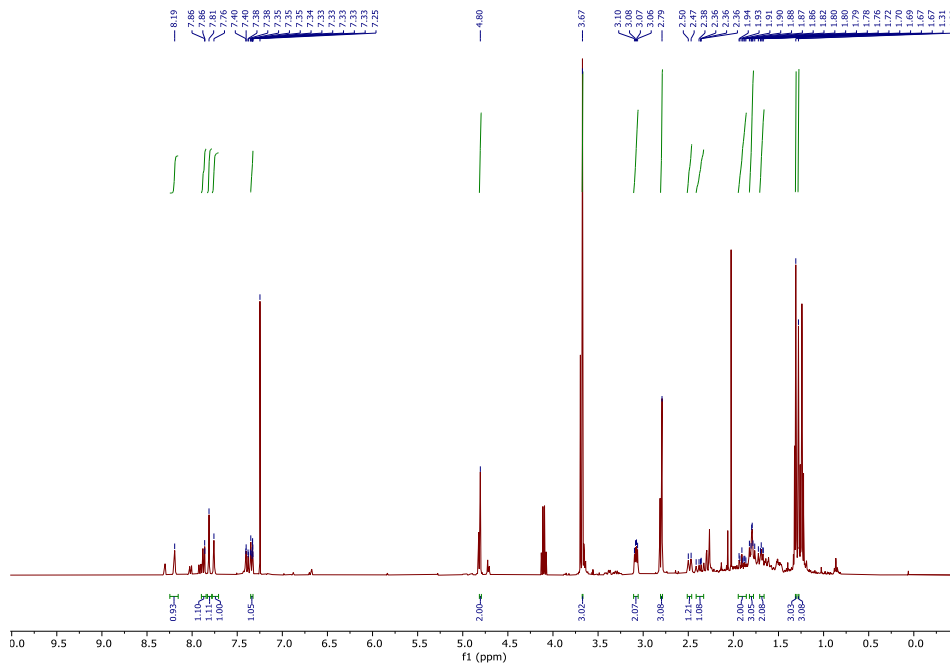

<sup>1</sup>H NMR (500 MHz, CDCl<sub>3</sub>) data of (+)-91

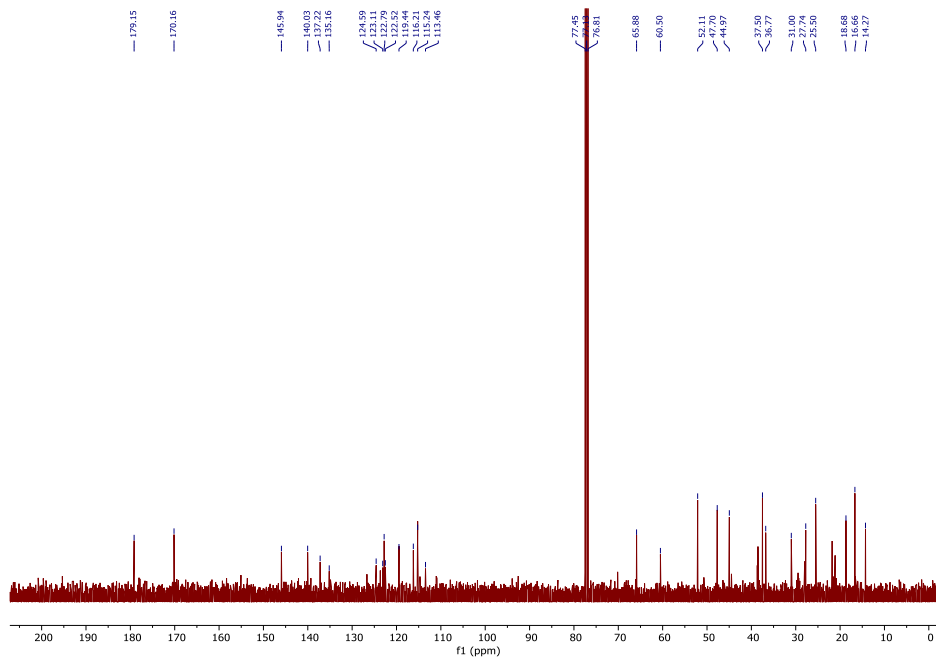

<sup>13</sup>C{<sup>1</sup>H} NMR (126 MHz, CDCl<sub>3</sub>) data of (+)-91

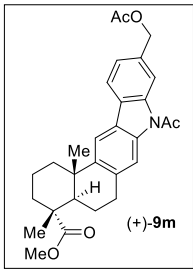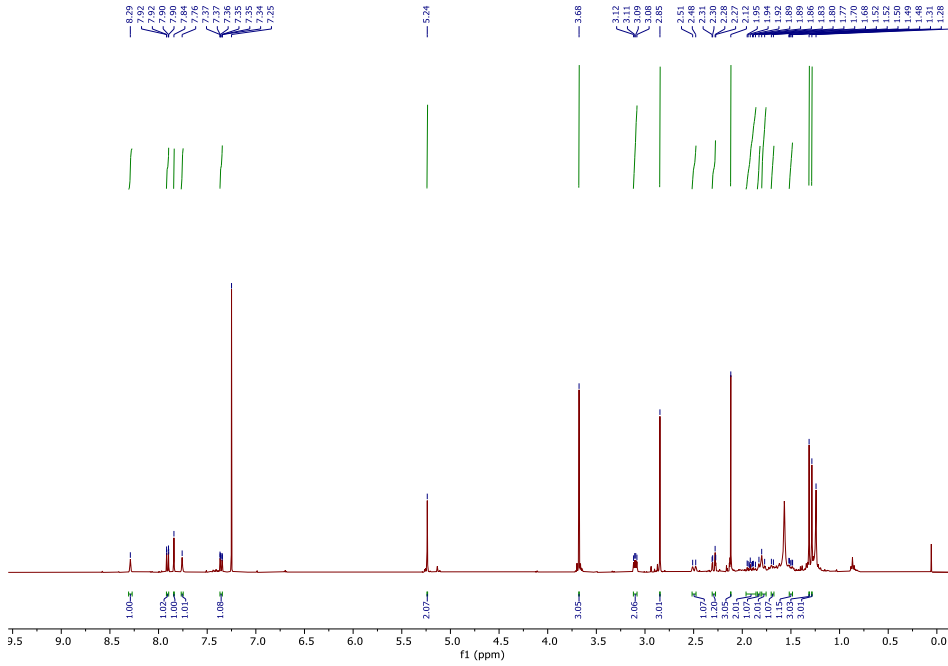

<sup>1</sup>H NMR (500 MHz, CDCl<sub>3</sub>) data of (+)-9m

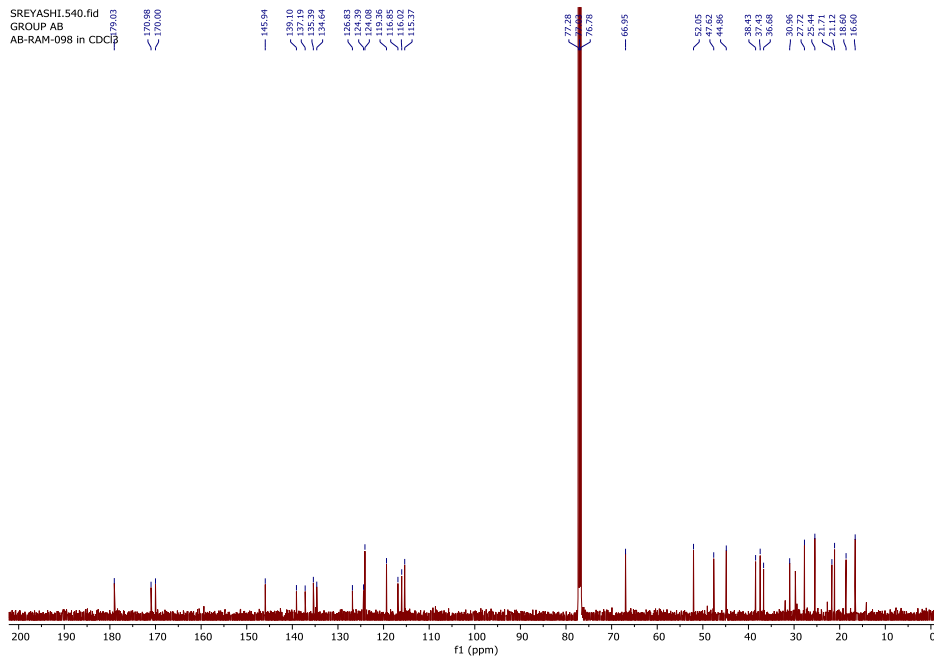

<sup>13</sup>C{<sup>1</sup>H} NMR (126 MHz, CDCl<sub>3</sub>) data of (+)-9m

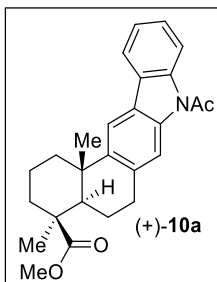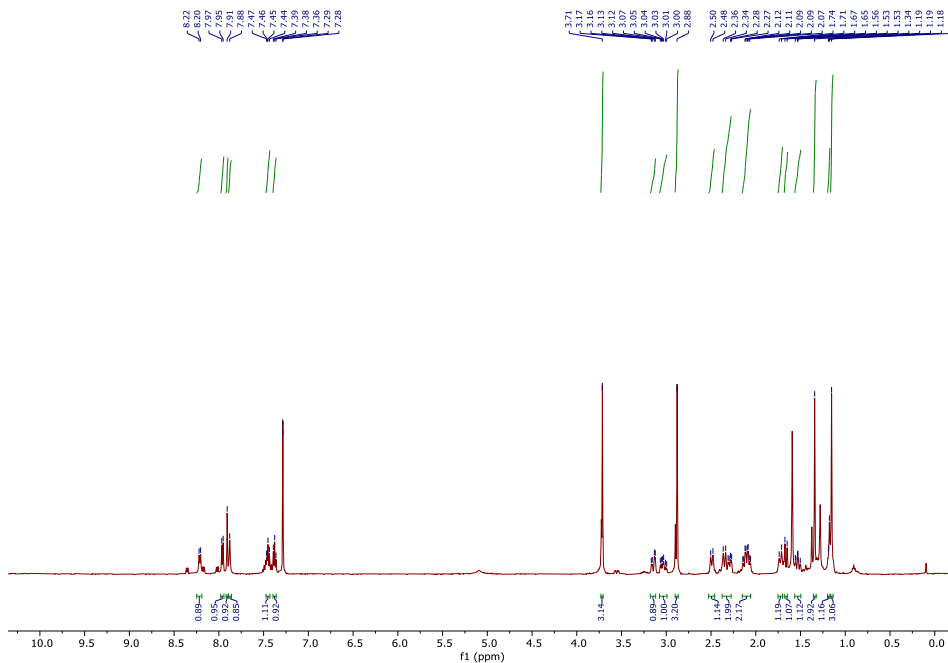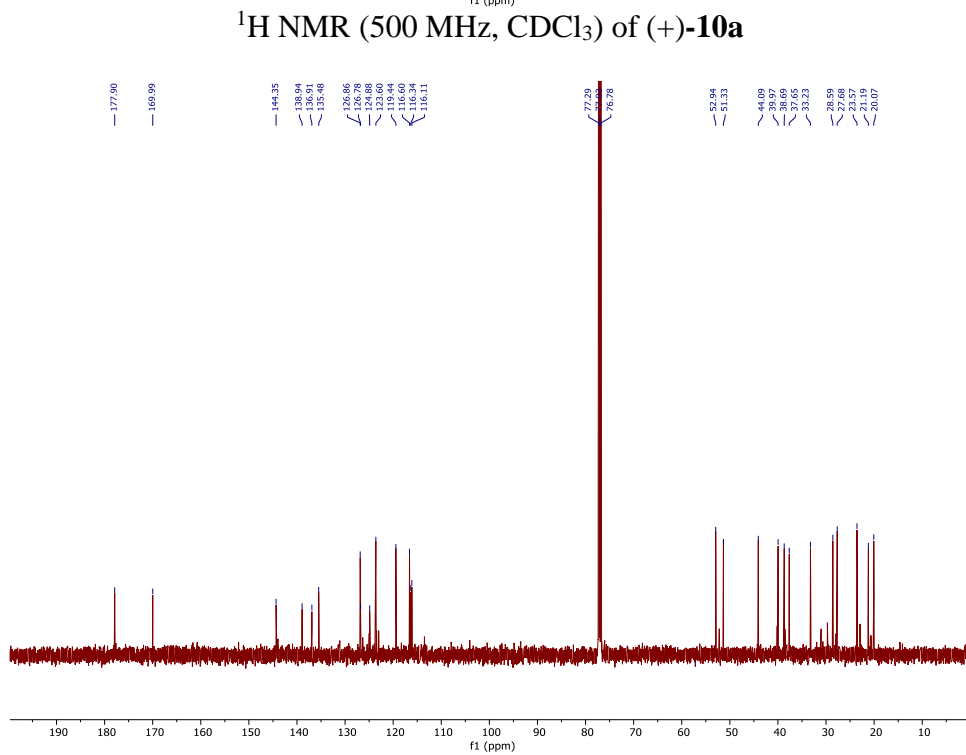

# Display Report

## Analysis Info

Analysis Name D:\Data\NEW USER DATA 2022\April-2022\19-april\Prof.A.Bisai-ABMM2324\_1-A,4\_01\_11781.d  
Method hrlcms-20 sept.m  
Sample Name Prof.A.Bisai-ABMM2324  
Comment

Acquisition Date 4/19/2022 4:37:06 PM  
Operator RUCHI  
Instrument micrOTOF-Q II 10330

## Acquisition Parameter

|             |          |                       |           |                  |           |
|-------------|----------|-----------------------|-----------|------------------|-----------|
| Source Type | ESI      | Ion Polarity          | Positive  | Set Nebulizer    | 1.2 Bar   |
| Focus       | Active   | Set Capillary         | 4500 V    | Set Dry Heater   | 200 °C    |
| Scan Begin  | 50 m/z   | Set End Plate Offset  | -500 V    | Set Dry Gas      | 6.0 l/min |
| Scan End    | 3000 m/z | Set Collision Cell RF | 130.0 Vpp | Set Divert Valve | Waste     |

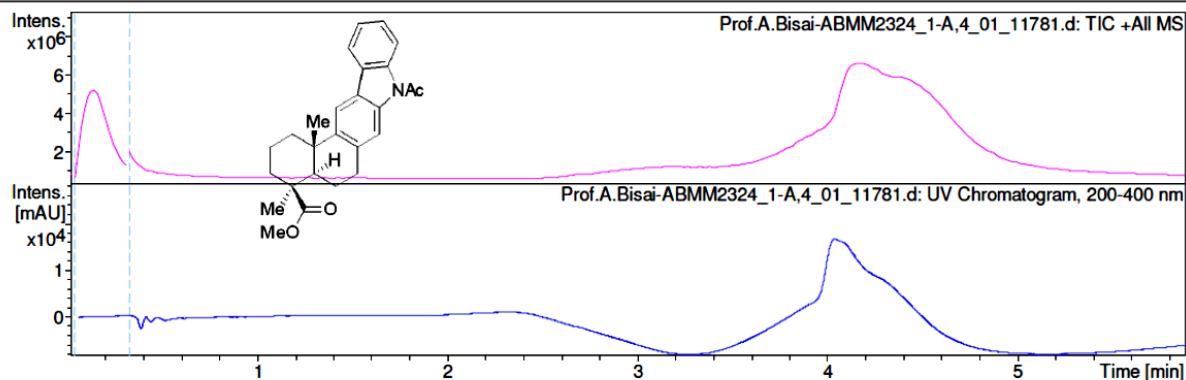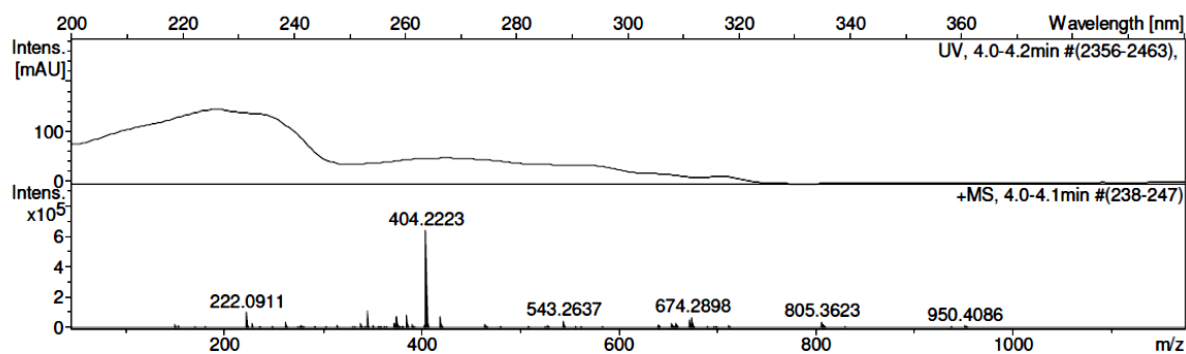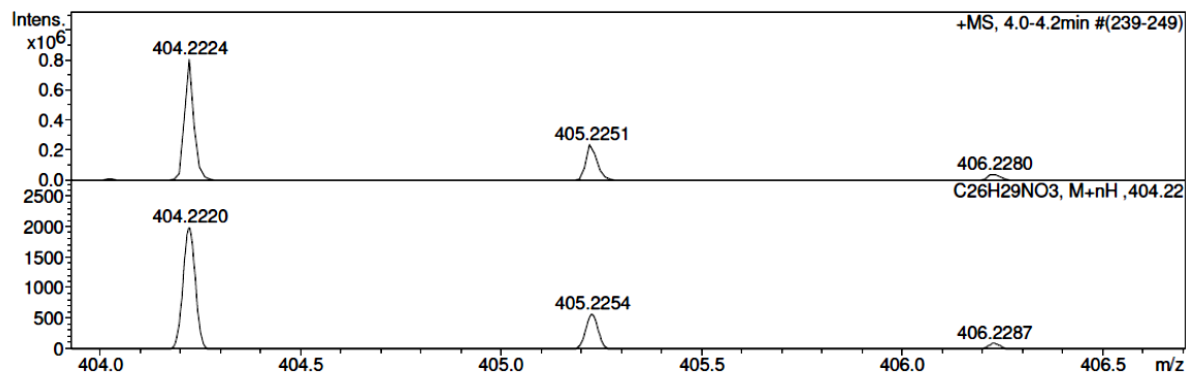

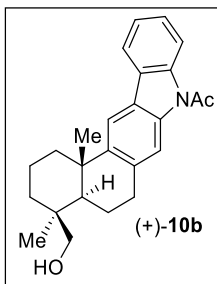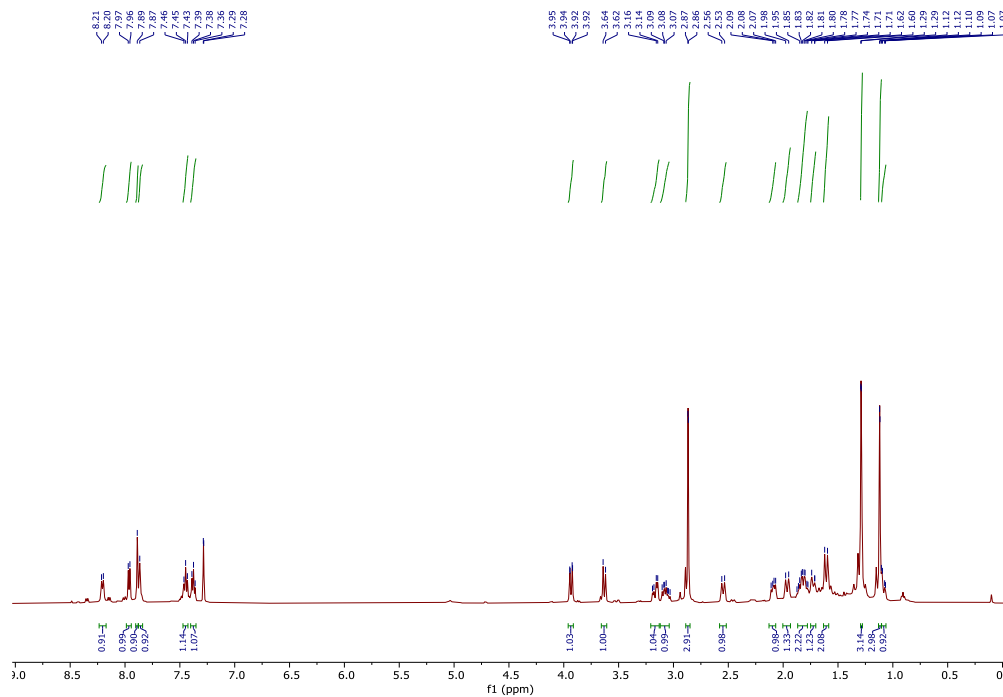

$^1\text{H}$  NMR (500 MHz,  $\text{CDCl}_3$ ) of (+)-10b

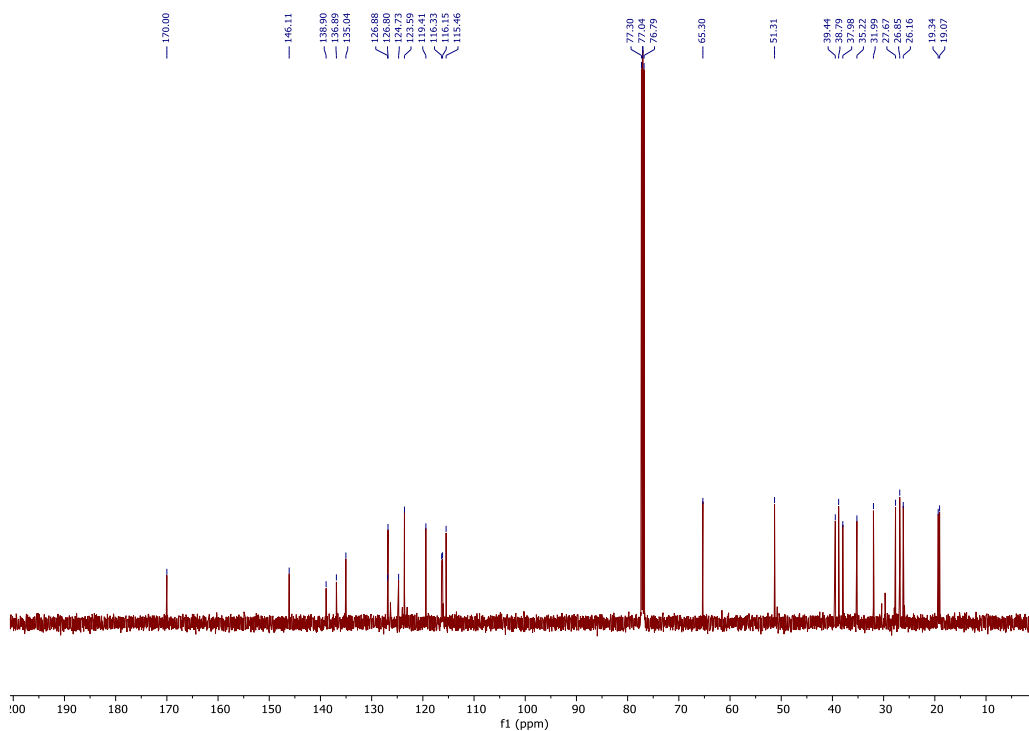

$^{13}\text{C}\{^1\text{H}\}$  NMR (125 MHz,  $\text{CDCl}_3$ ) of (+)-10b



## Display Report

|                      |                                                                                          |                  |                       |
|----------------------|------------------------------------------------------------------------------------------|------------------|-----------------------|
| <b>Analysis Info</b> | D:\Data\NEW_USER_DATA_2022\April-2022\22-April\Prof.A.Bisai-AB-MM-02329_1-A_4_01_11799.d | Acquisition Date | 4/22/2022 12:01:24 PM |
| Method               | hrlcms-20 sept.m                                                                         | Operator         | RUCHI                 |
| Sample Name          | Prof.A.Bisai-AB-MM-02329                                                                 | Instrument       | micrOTOF-Q II 10330   |
| Comment              |                                                                                          |                  |                       |

|                              |          |                       |           |                  |           |
|------------------------------|----------|-----------------------|-----------|------------------|-----------|
| <b>Acquisition Parameter</b> |          |                       |           |                  |           |
| Source Type                  | ESI      | Ion Polarity          | Positive  | Set Nebulizer    | 1.2 Bar   |
| Focus                        | Active   | Set Capillary         | 4500 V    | Set Dry Heater   | 200 °C    |
| Scan Begin                   | 50 m/z   | Set End Plate Offset  | -500 V    | Set Dry Gas      | 6.0 l/min |
| Scan End                     | 3000 m/z | Set Collision Cell RF | 130.0 Vpp | Set Divert Valve | Waste     |

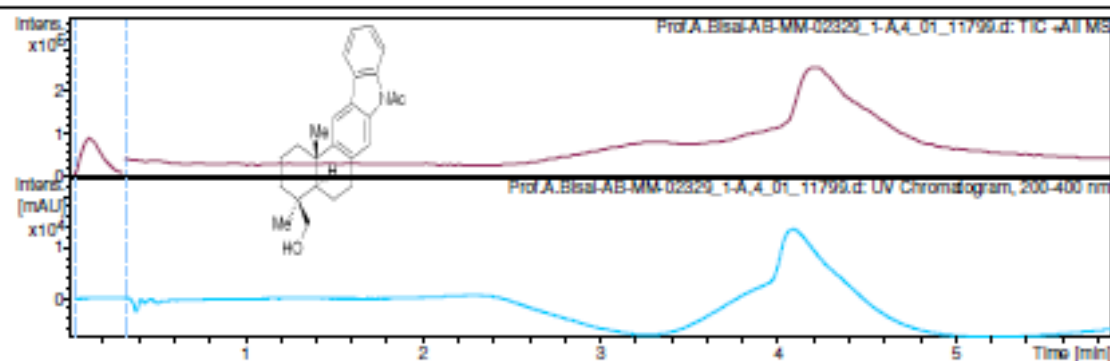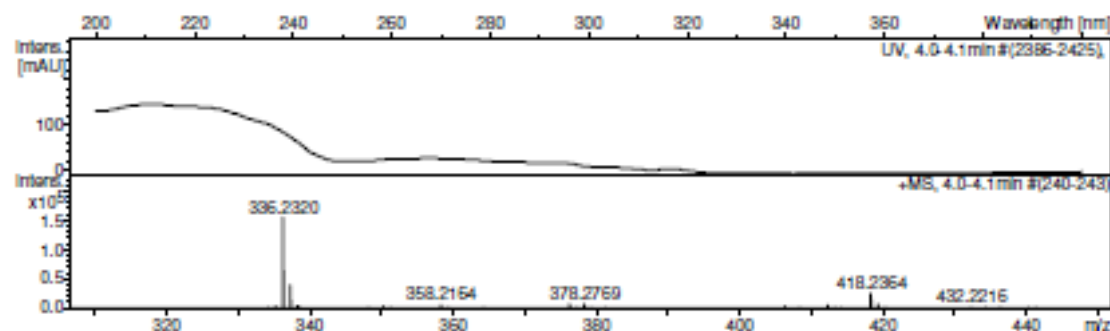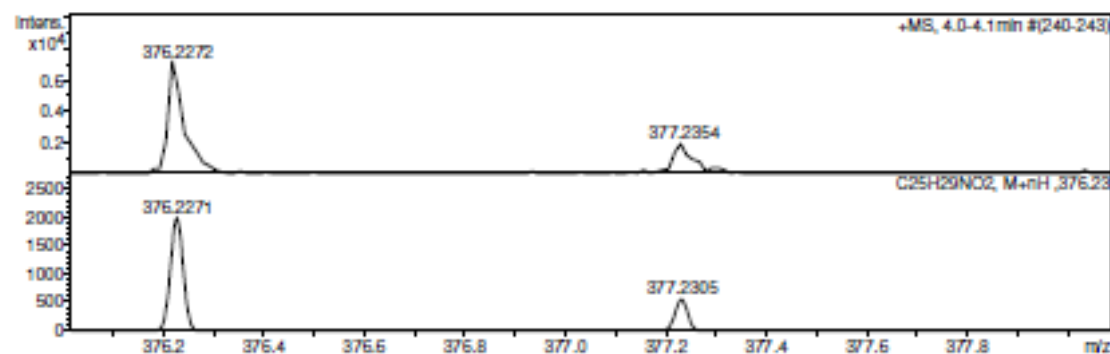

HRMS data of (+)-10b

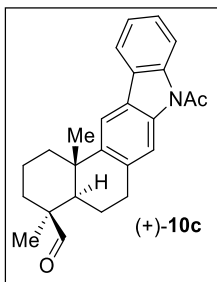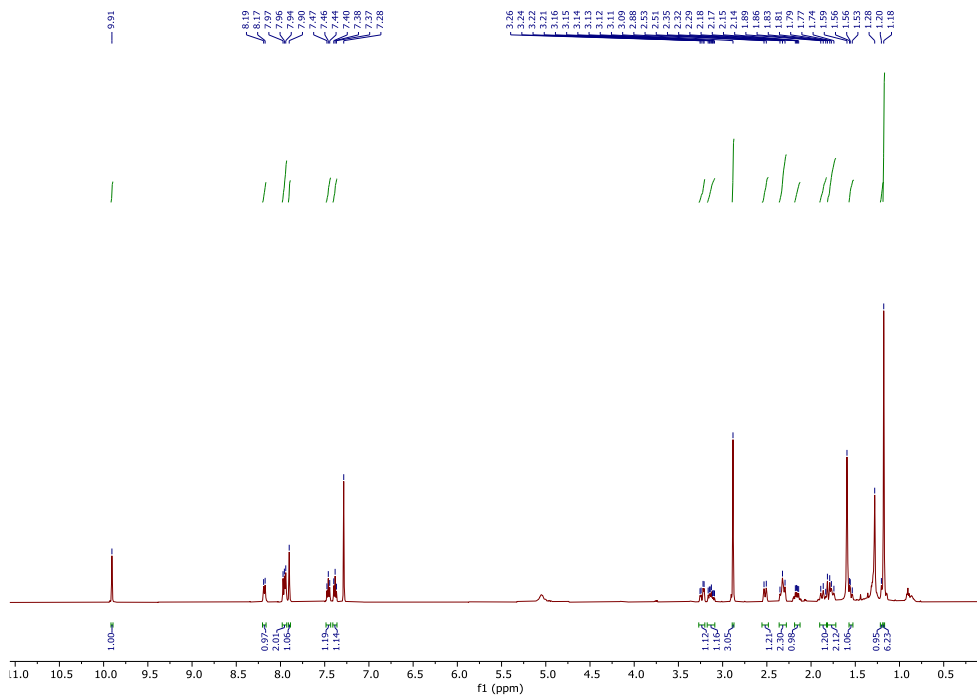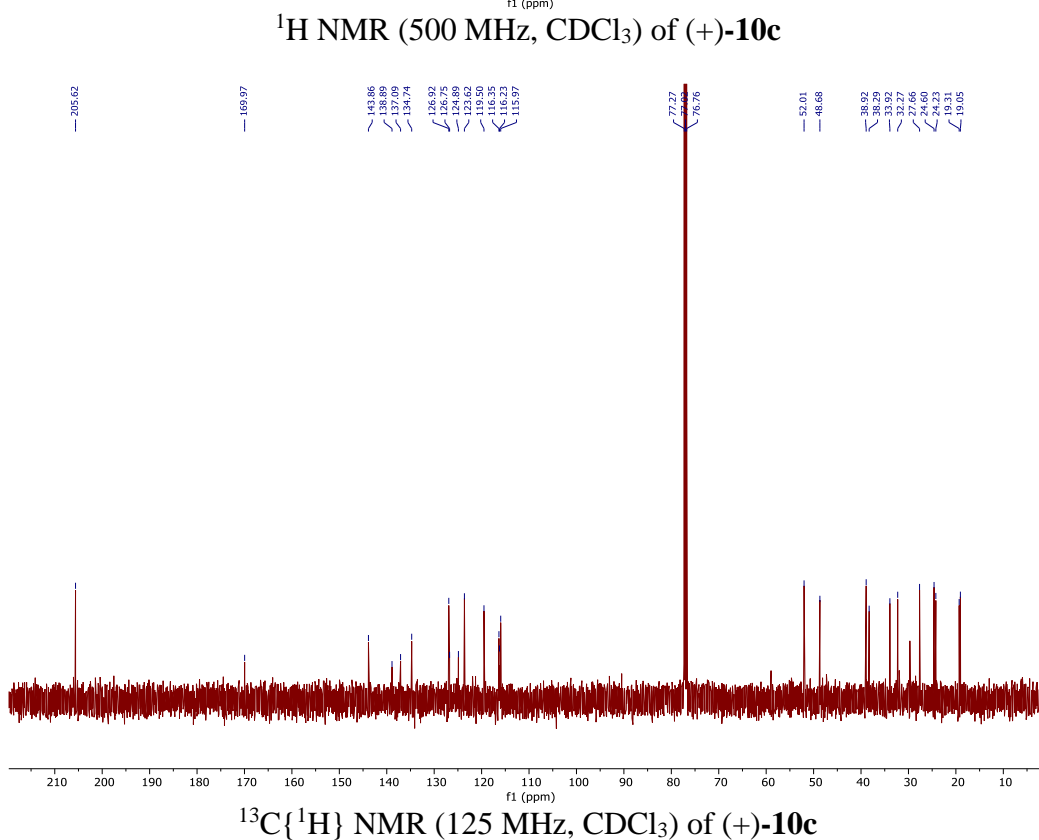

# Display Report

## Analysis Info

Analysis Name D:\Data\NEW USER DATA 2022\April-2022\19-april\Prof.A.Bisai-ABMM2331\_1-A,3\_01\_11780.d  
Method hrlcms-20 sept.m  
Sample Name Prof.A.Bisai-ABMM2331  
Comment

Acquisition Date 4/19/2022 4:29:57 PM  
Operator RUCHI  
Instrument microTOF-Q II 10330

## Acquisition Parameter

|             |          |                       |           |                  |           |
|-------------|----------|-----------------------|-----------|------------------|-----------|
| Source Type | ESI      | Ion Polarity          | Positive  | Set Nebulizer    | 1.2 Bar   |
| Focus       | Active   | Set Capillary         | 4500 V    | Set Dry Heater   | 200 °C    |
| Scan Begin  | 50 m/z   | Set End Plate Offset  | -500 V    | Set Dry Gas      | 6.0 l/min |
| Scan End    | 3000 m/z | Set Collision Cell RF | 130.0 Vpp | Set Divert Valve | Waste     |

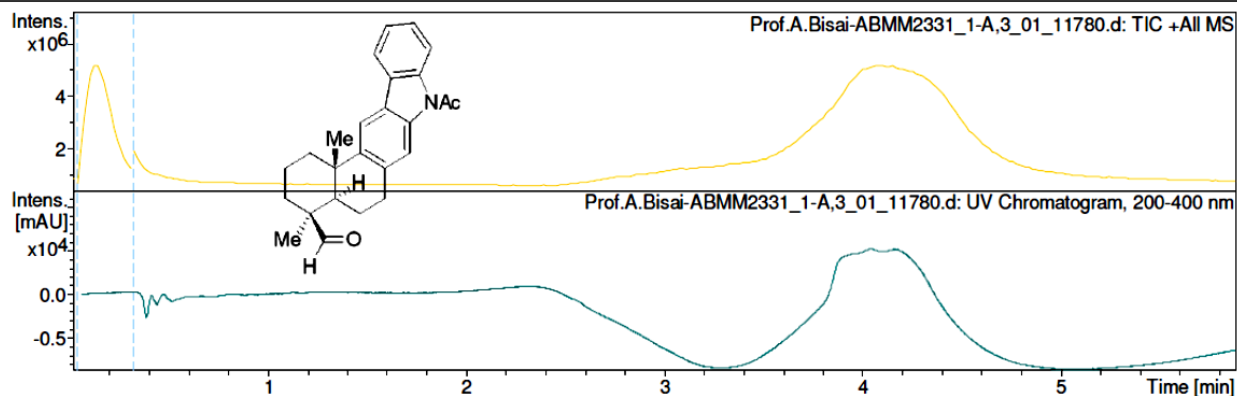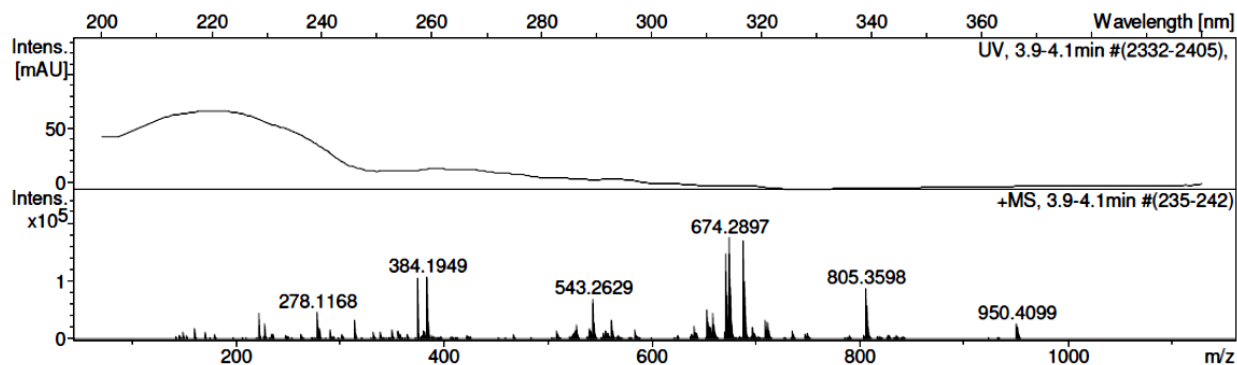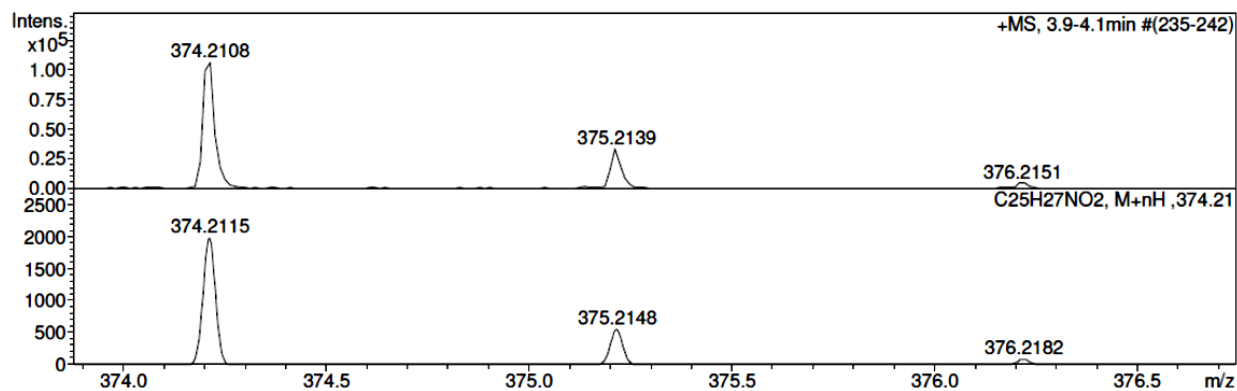

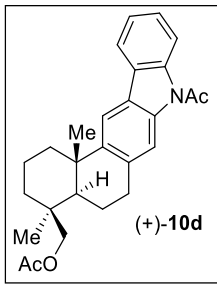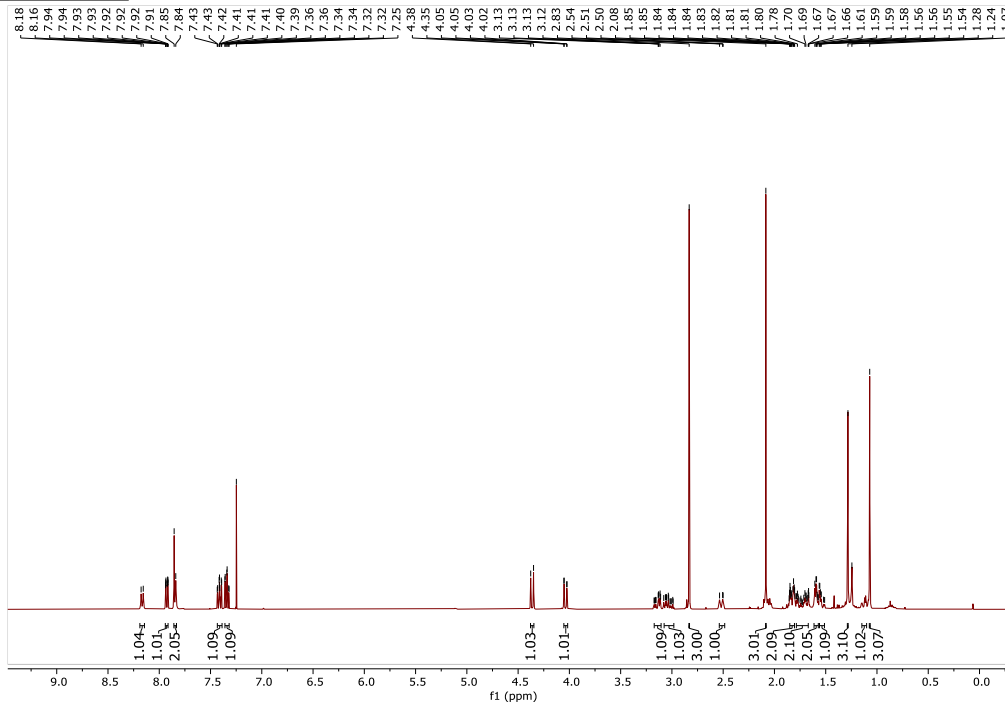

$^1\text{H}$  NMR (400 MHz,  $\text{CDCl}_3$ ) of compound (+)-10d

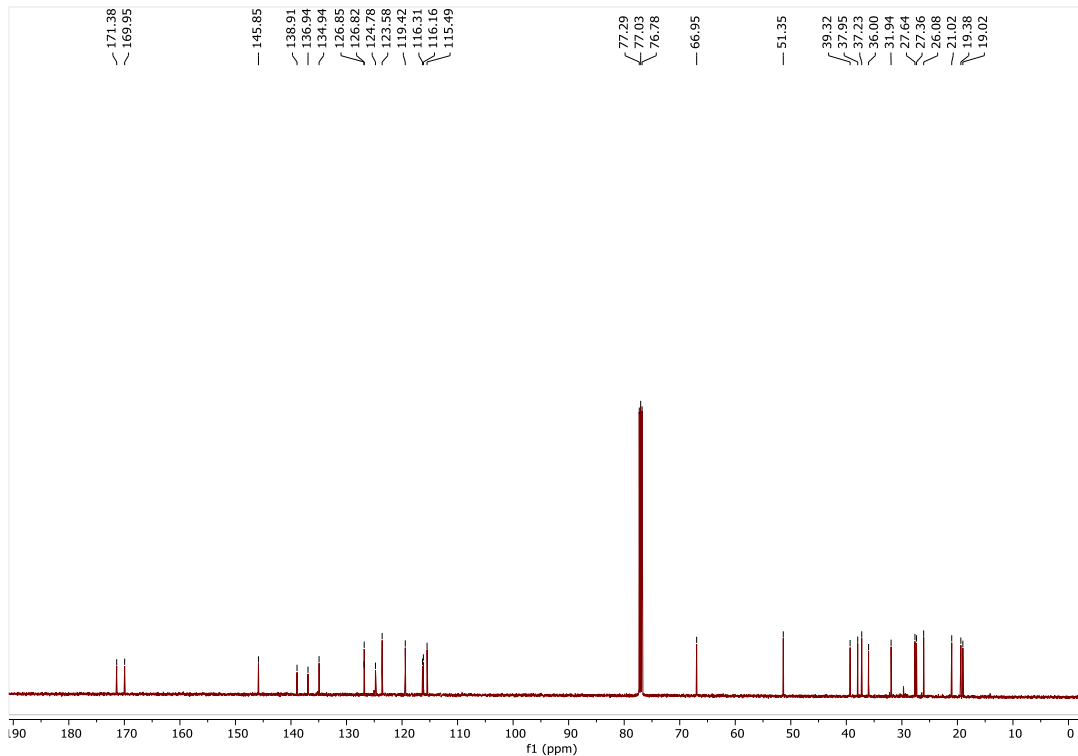

$^{13}\text{C}\{^1\text{H}\}$  NMR (126 MHz,  $\text{CDCl}_3$ ) of compound (+)-10d

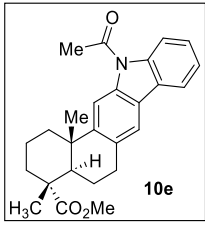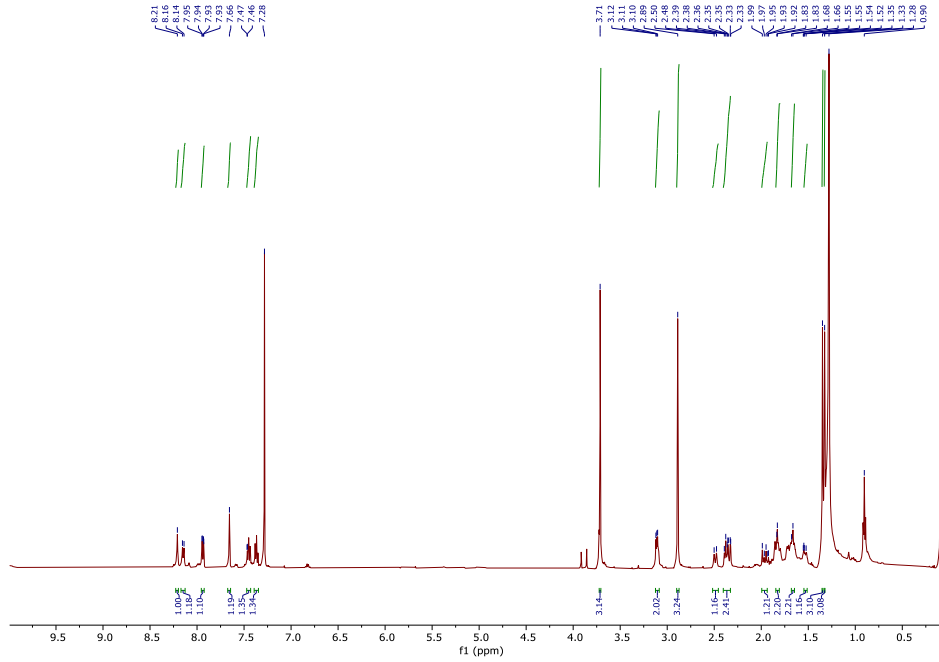

<sup>1</sup>H NMR (500 MHz, CDCl<sub>3</sub>) of compound **10e**

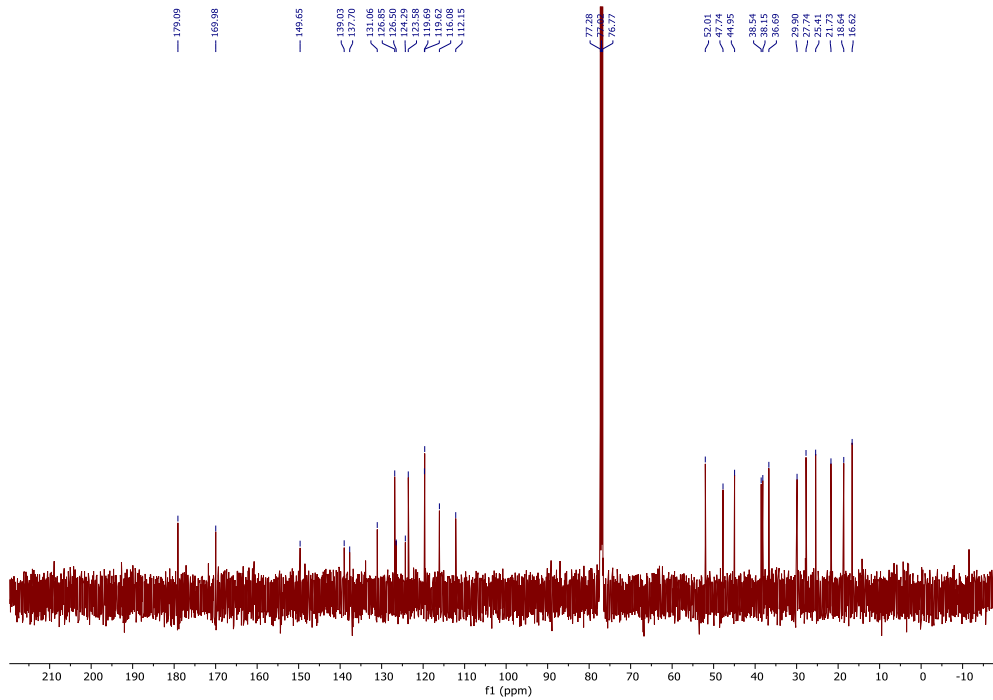

<sup>13</sup>C NMR (125 MHz, CDCl<sub>3</sub>) of compound **10e**

AB02-Apr-2024 13:43:06  
AB-NKR-01041 (0.053) Is (1.00,1.00) C<sub>26</sub>H<sub>30</sub>NO<sub>3</sub>

IISER - KOLKATA

1: TOF MS ES+  
7.45e12

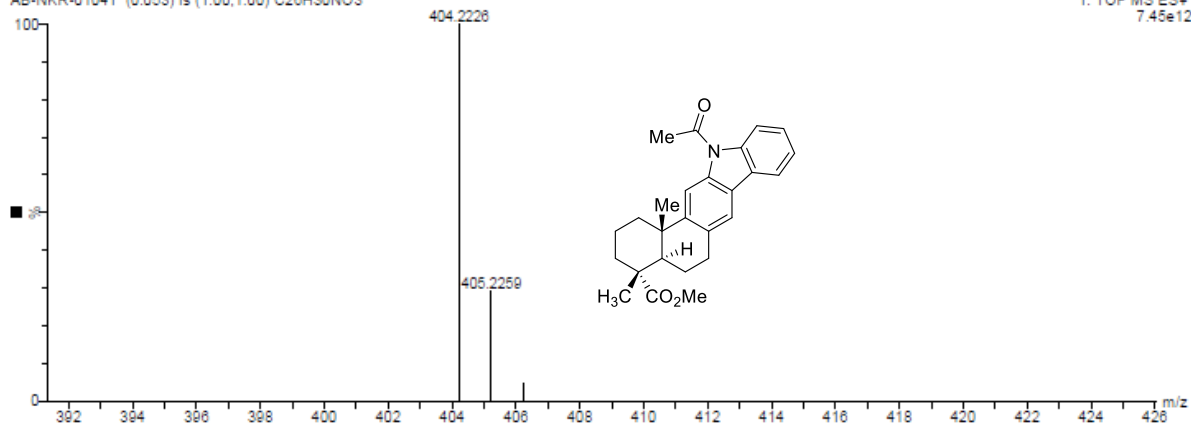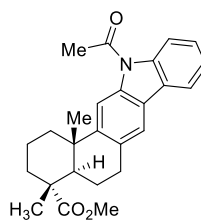

AB-NKR-01041 3 (0.087) AM2 (Ar,22000,0,556,28,0,00,LS 10); ABS  
404.2211  
1: TOF MS ES+  
3.11e8

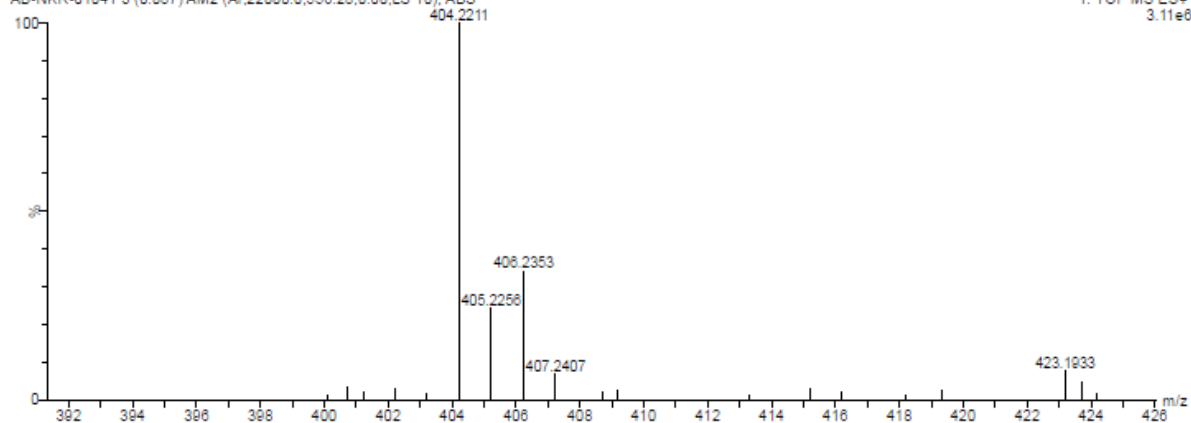

Mass data of compound 10e

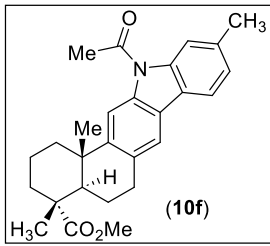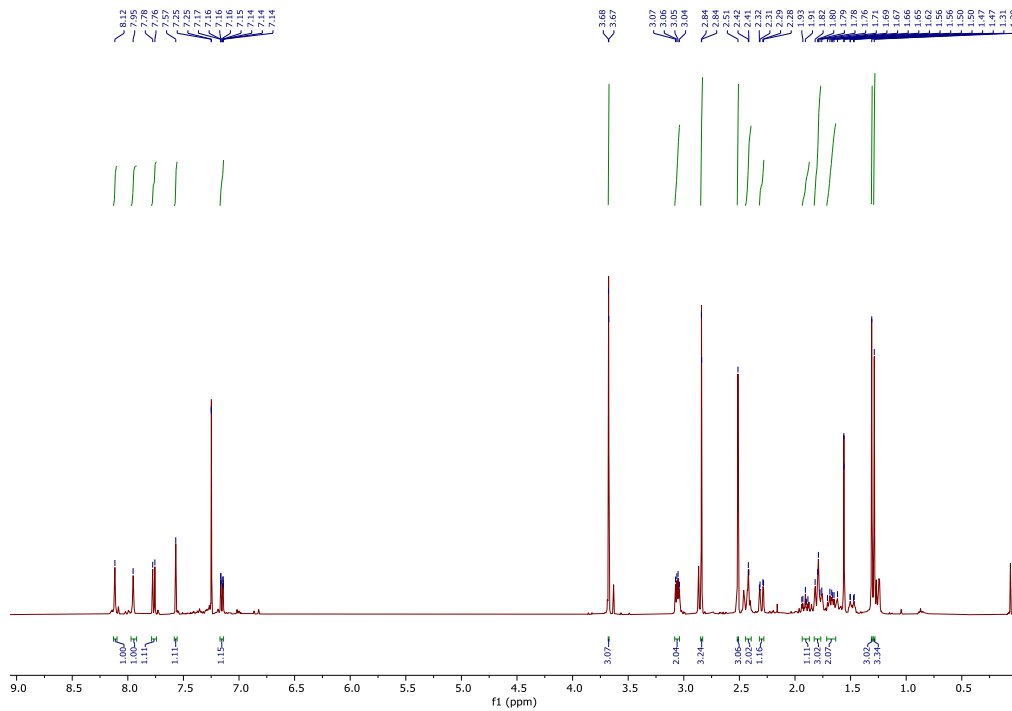

<sup>1</sup>H NMR (500 MHz, CDCl<sub>3</sub>) of compound (10f)

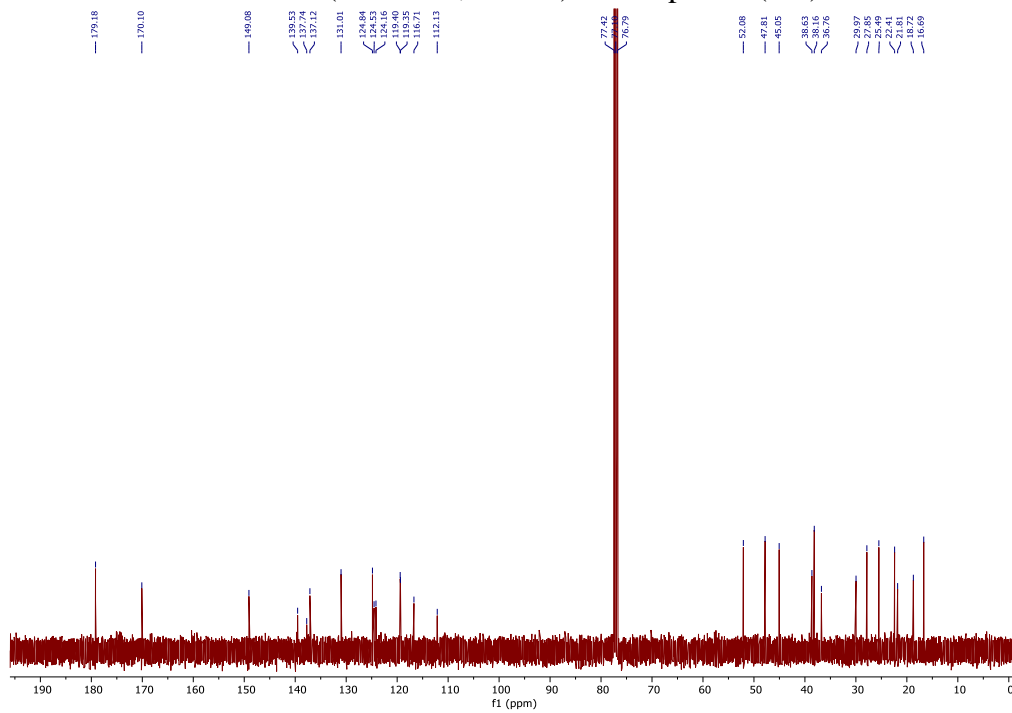

<sup>13</sup>C{<sup>1</sup>H} NMR (125 MHz, CDCl<sub>3</sub>) of compound (10f)

AB29-Apr-2024 14:39:02

IISER - KOLKATA

1: TOF MS ES+  
7.37e12

AB-NKR-01262 (0.053) Is (1.00,1.00) C<sub>27</sub>H<sub>32</sub>NO<sub>3</sub>

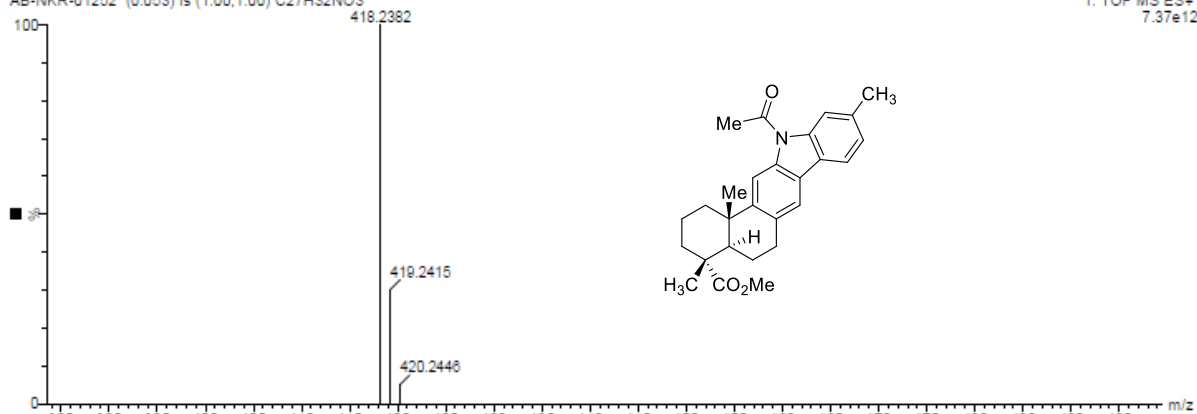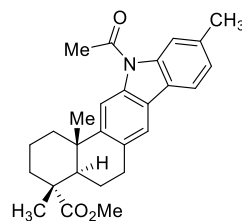

AB-NKR-01262 2 (0.070) AM2 (Ar.22000,0.556,28,0,00,LS 10); ABS

1: TOF MS ES+  
7.28e8

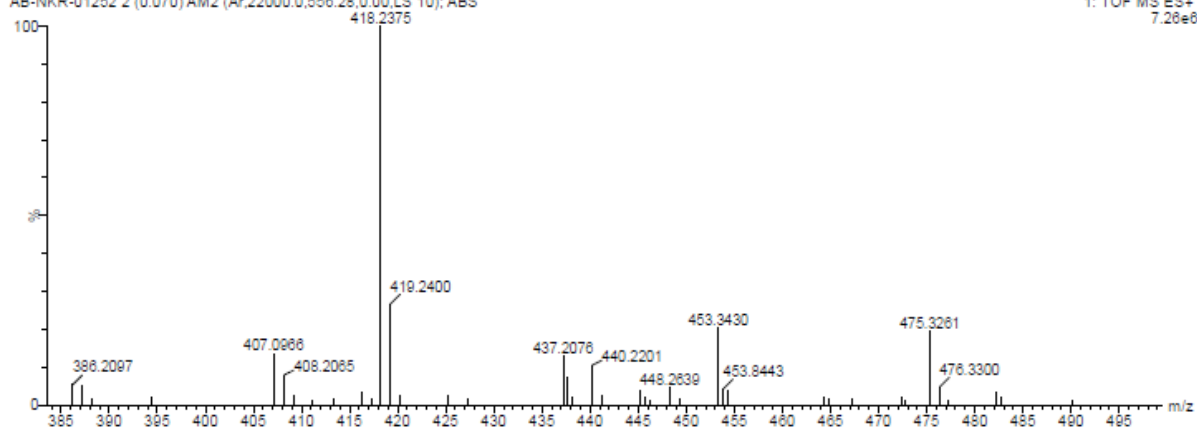

Mass data of compound **10f**



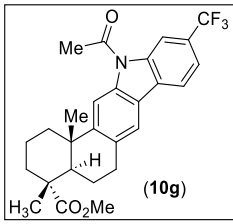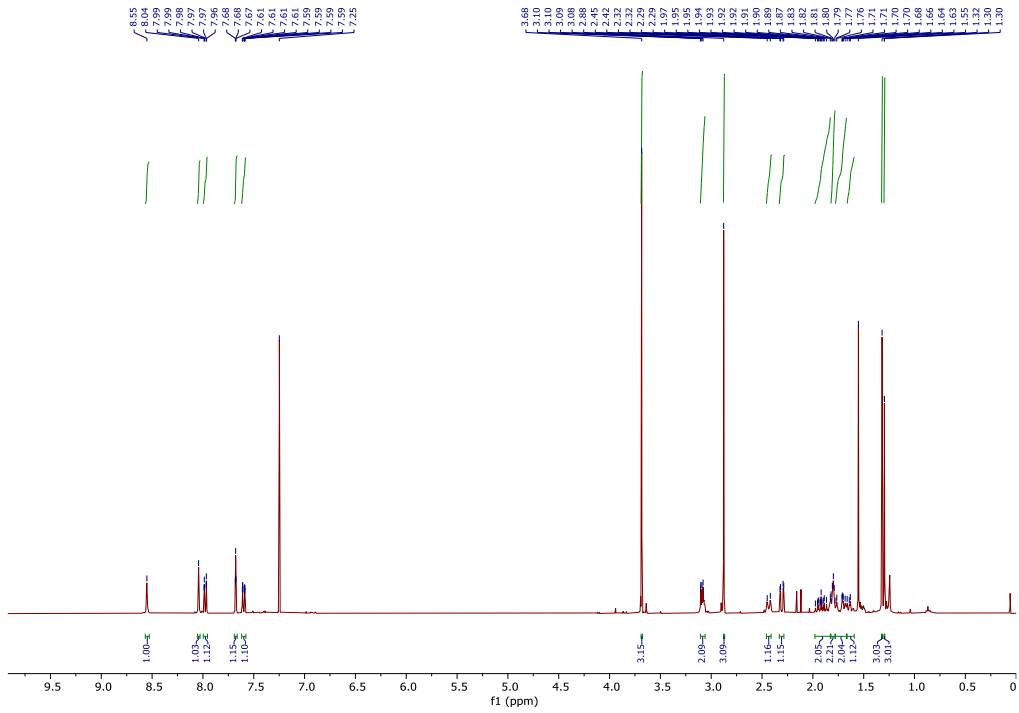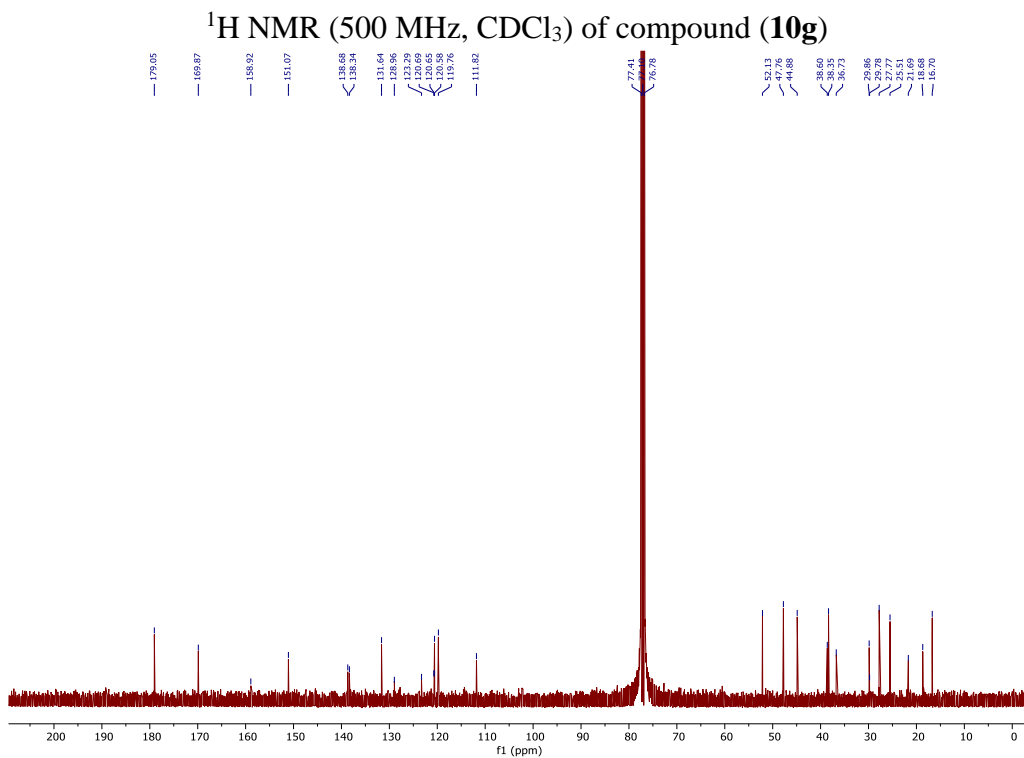

**<sup>13</sup>C{<sup>1</sup>H} NMR (125 MHz, CDCl<sub>3</sub>) of compound (10g)**

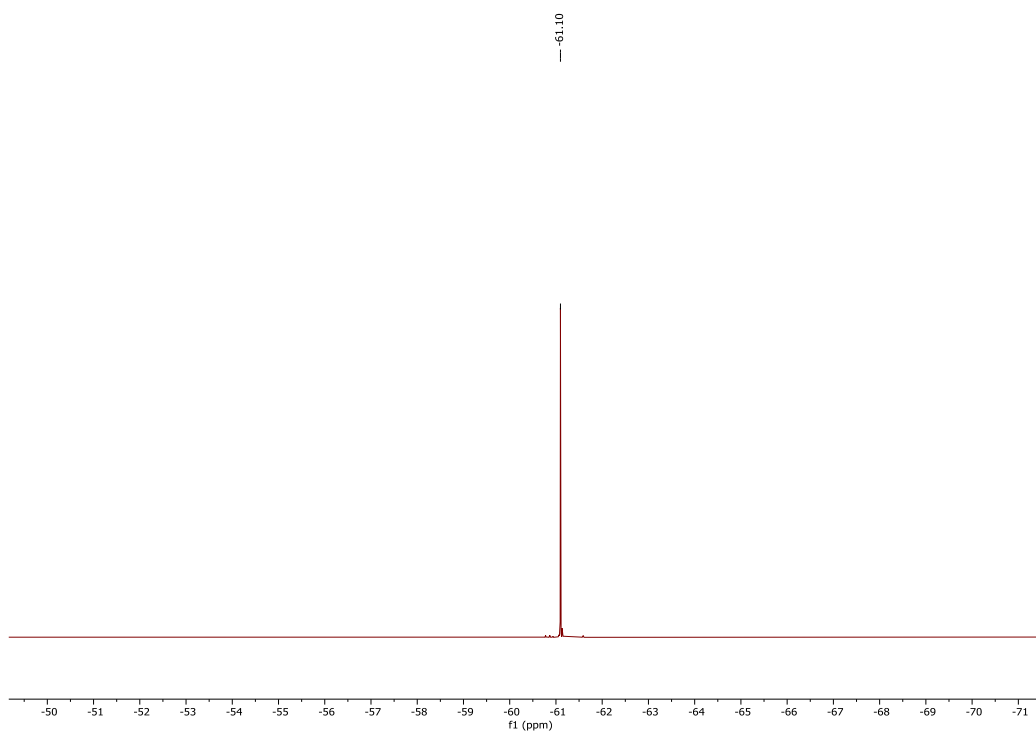

$^{19}\text{F}\{^1\text{H}\}$  NMR (376 MHz,  $\text{CDCl}_3$ ) of compound **10g**

AB29-Apr-2024 14:37:25

IISER - KOLKATA

1: TOF MS ES+  
7.37e12

AB-NKR-01251 (0.053) Is (1.00,1.00) C<sub>27</sub>H<sub>29</sub>F<sub>3</sub>NO<sub>3</sub>

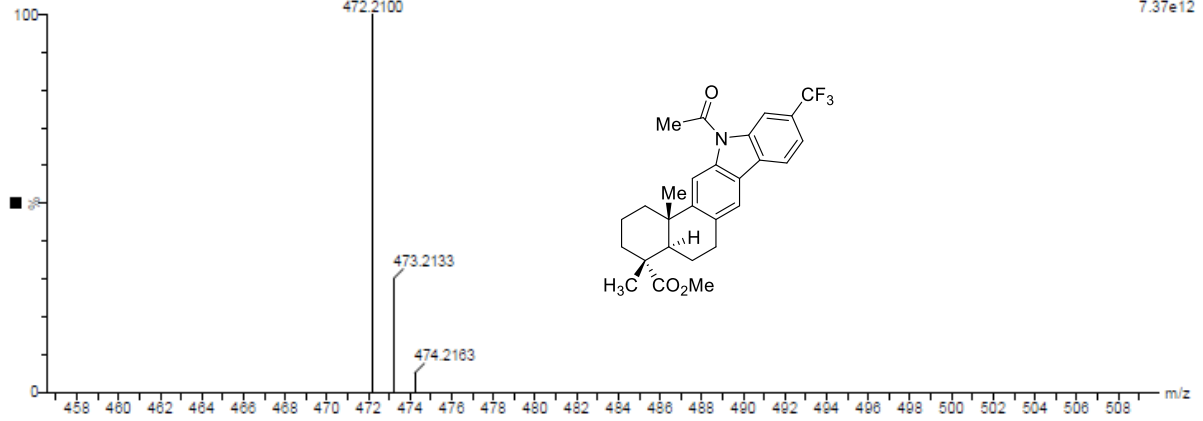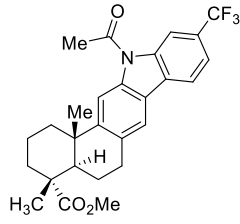

AB-NKR-01251 2 (0.070) AM2 (Ar,22000.0,556.28,0.00,LS 10); ABS

1: TOF MS ES+  
2.75e8

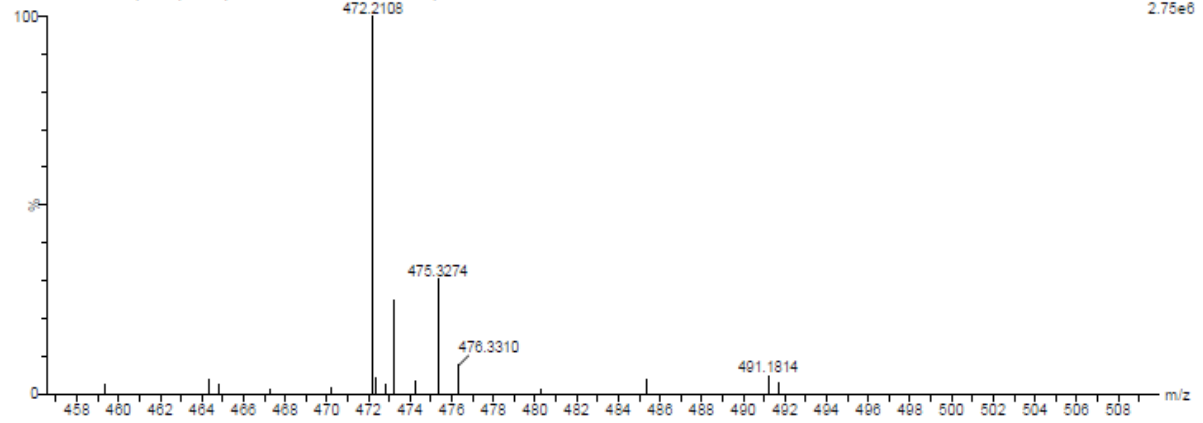

Mass data of compound (10g)

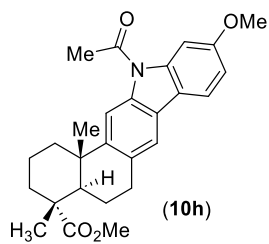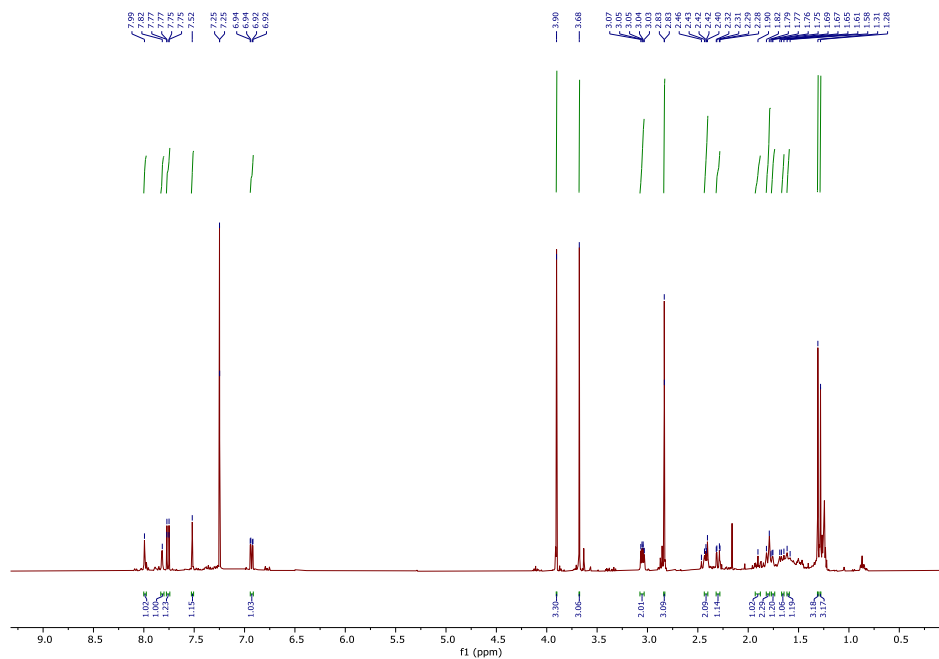

<sup>1</sup>H NMR (500 MHz, CDCl<sub>3</sub>) of compound (10h)

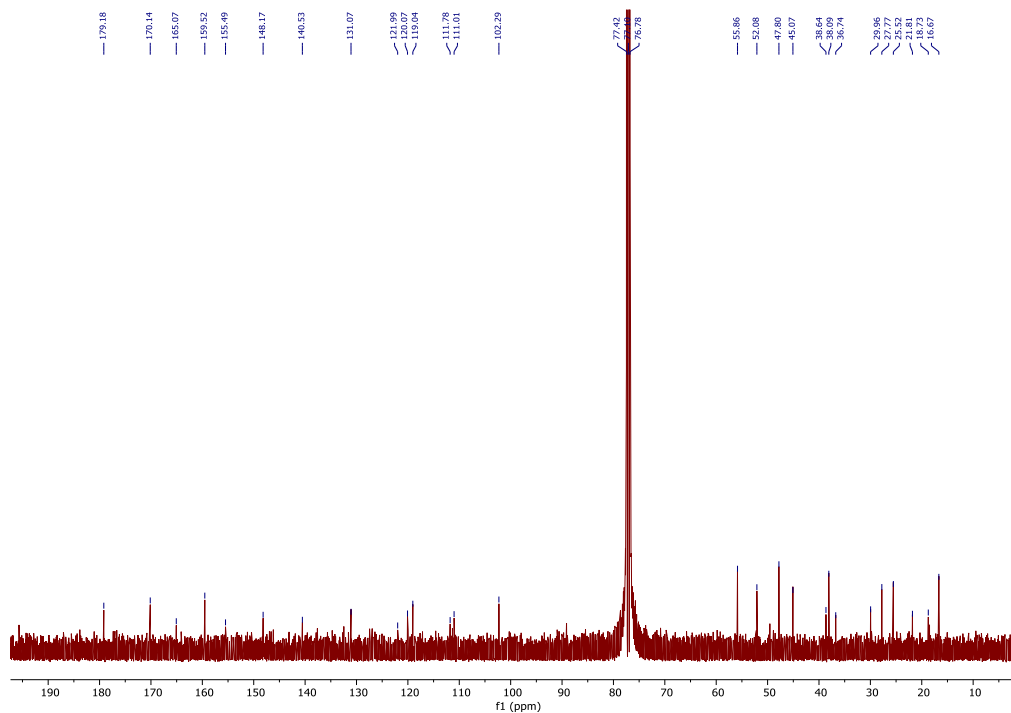

<sup>13</sup>C{<sup>1</sup>H} NMR (125 MHz, CDCl<sub>3</sub>) of compound (10h)

AB29-Apr-2024 14:40:39

IISER - KOLKATA

1: TOF MS ES+  
7.35e12

AB-NKR-01253 (0.053) Is (1.00,1.00) C<sub>27</sub>H<sub>32</sub>NO<sub>4</sub>

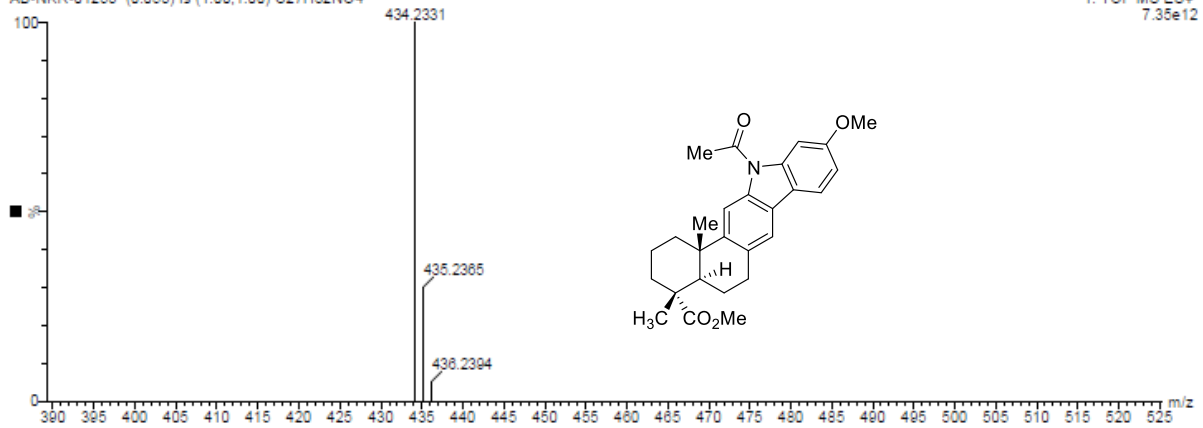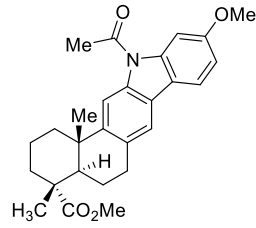

AB-NKR-01253 3 (0.087) AM2 (Ar,22000.0,556.28,0.00,LS 10); ABS

1: TOF MS ES+  
3.54e8

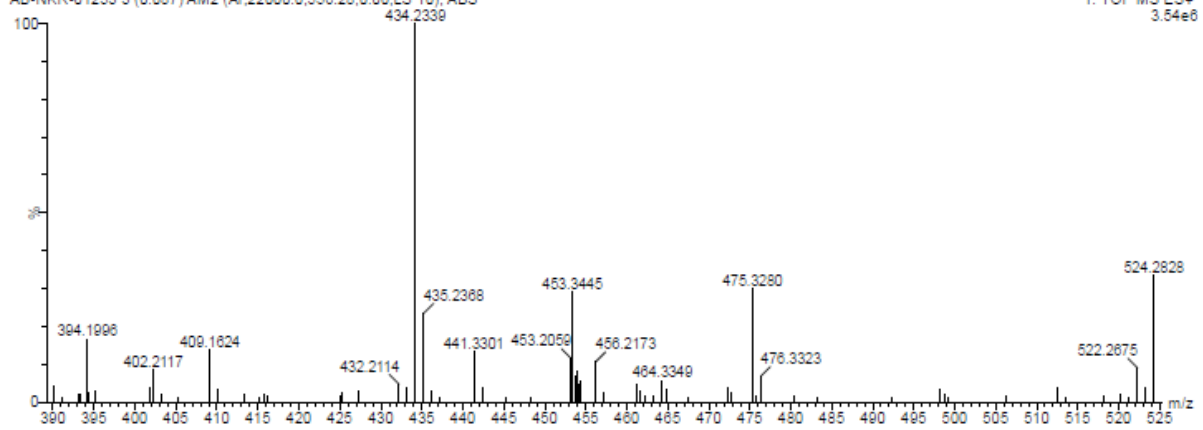

Mass data of compound (**10h**)

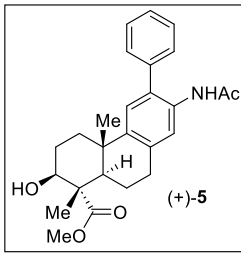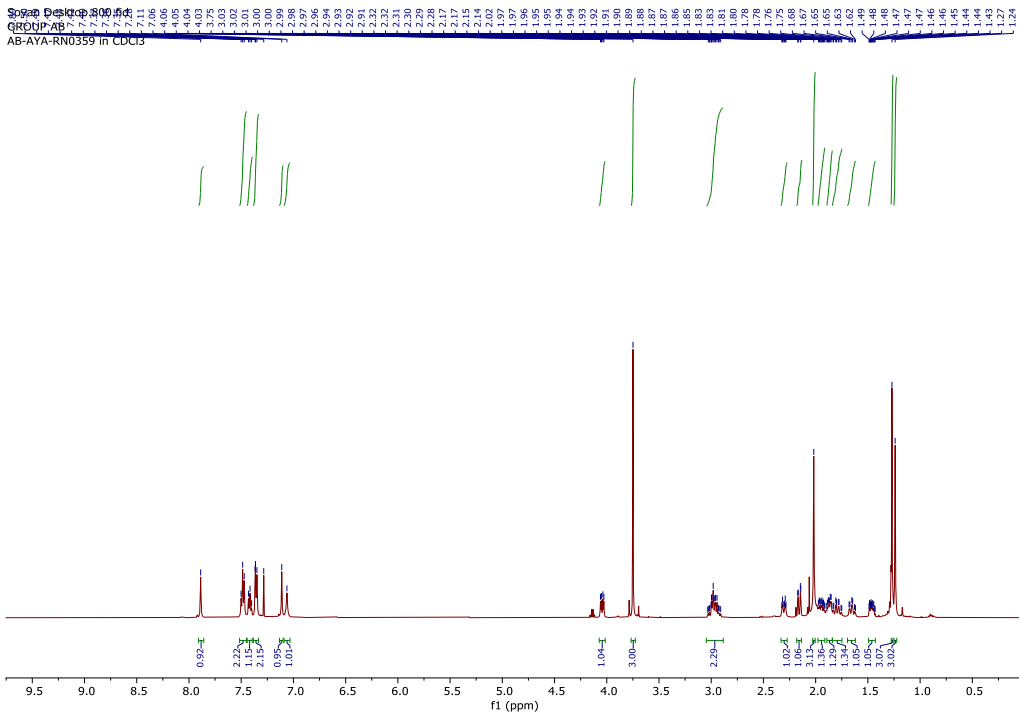

<sup>1</sup>H NMR (500 MHz, CDCl<sub>3</sub>) of (+)-5

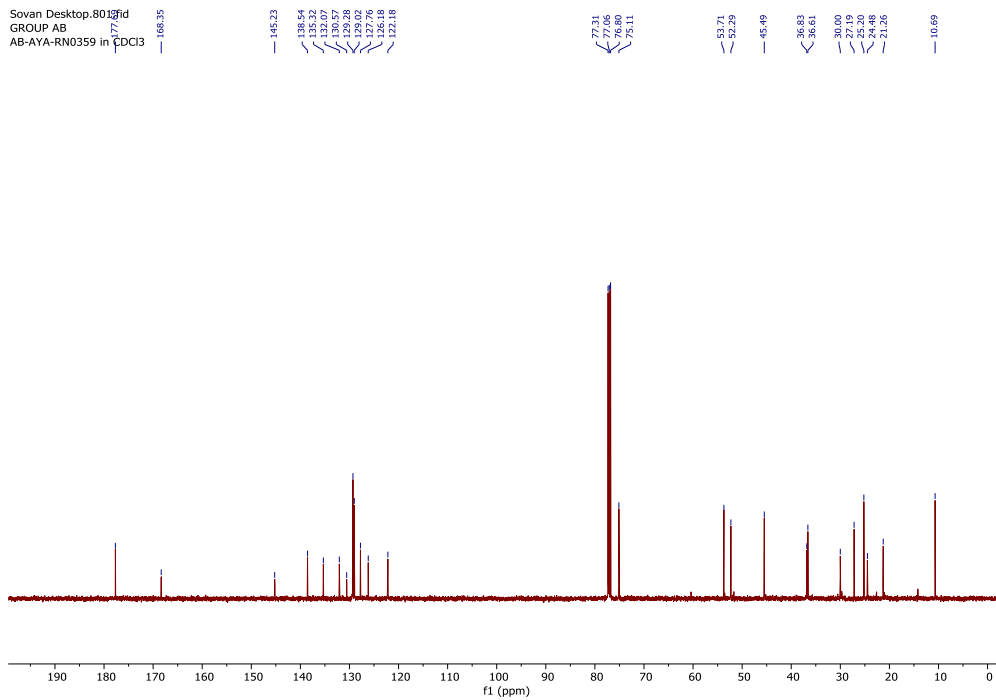

<sup>13</sup>C{<sup>1</sup>H} NMR (125 MHz, CDCl<sub>3</sub>) of (+)-5

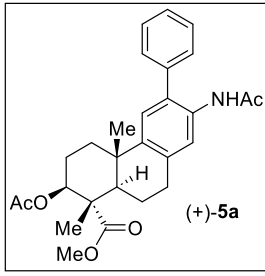

NMR\_891.fid  
 GROUP AB  
 AB-AYA-RN0357 in CDCl<sub>3</sub>

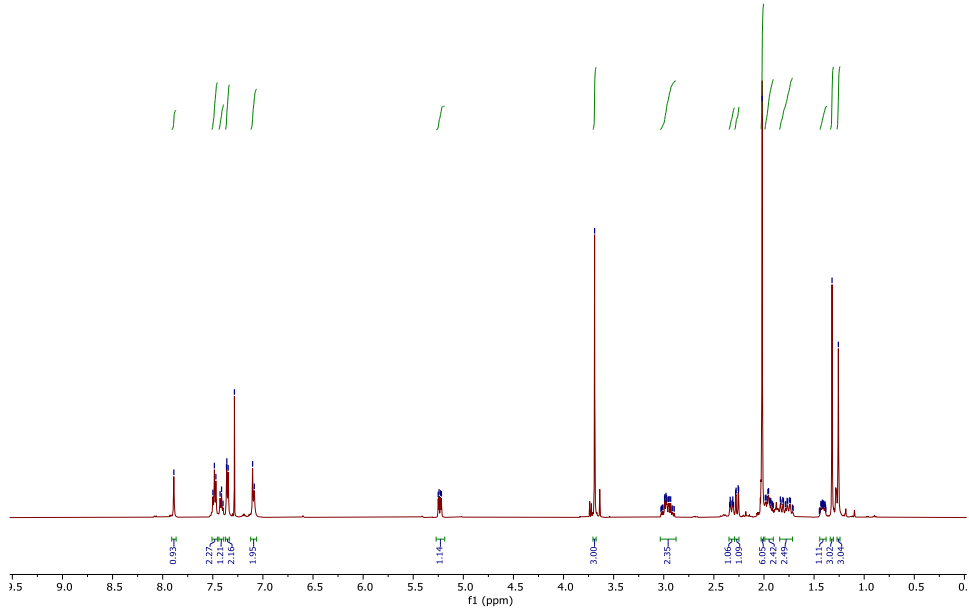

NMR\_891.fid  
 GROUP AB  
 AB-AYA-RN0357 in CDCl<sub>3</sub>

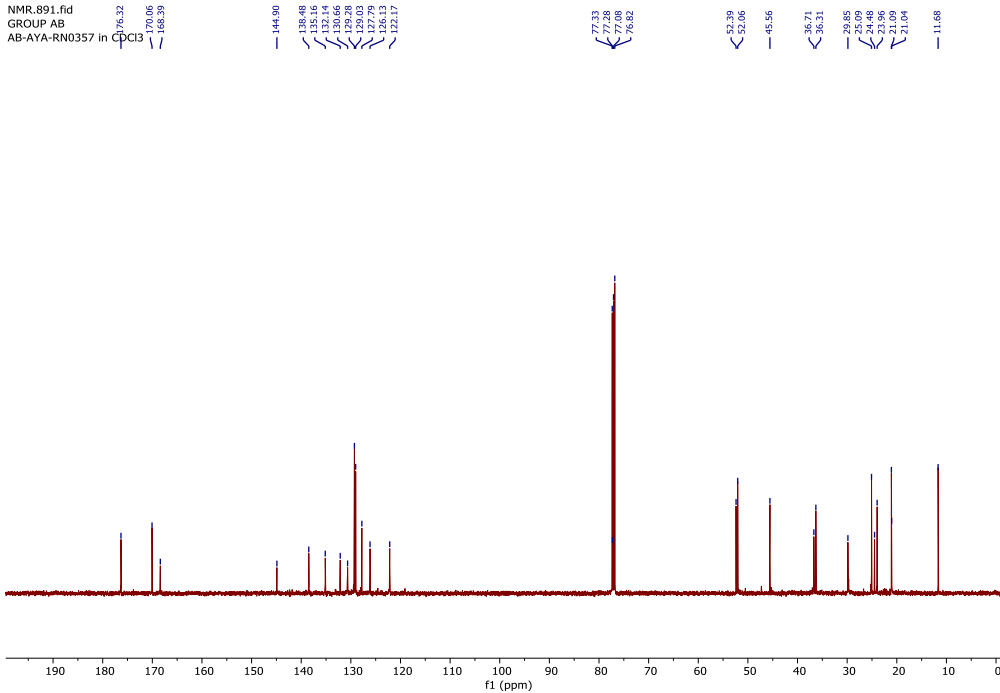

AB28-Mar-2024 14:05:29

IISER - KOLKATA

1: TOF MS ES+  
7.25e12

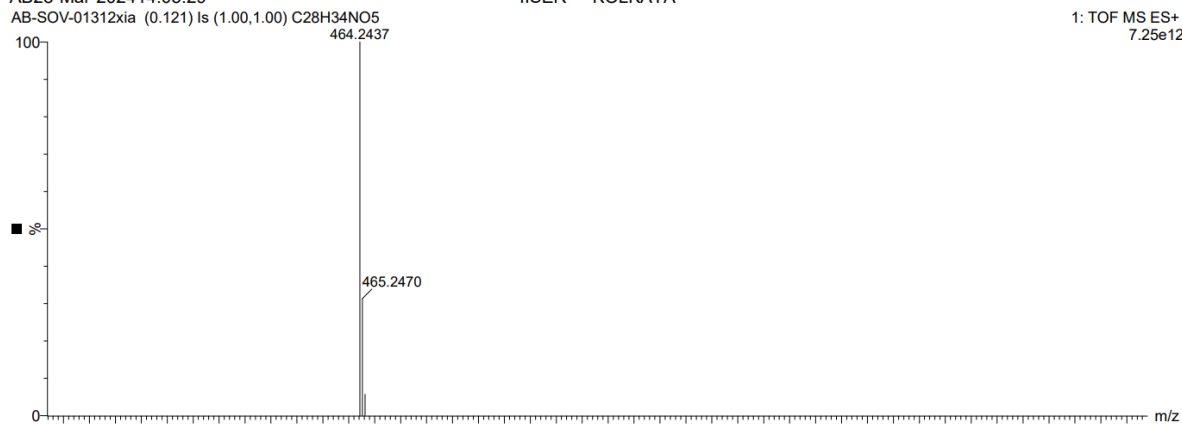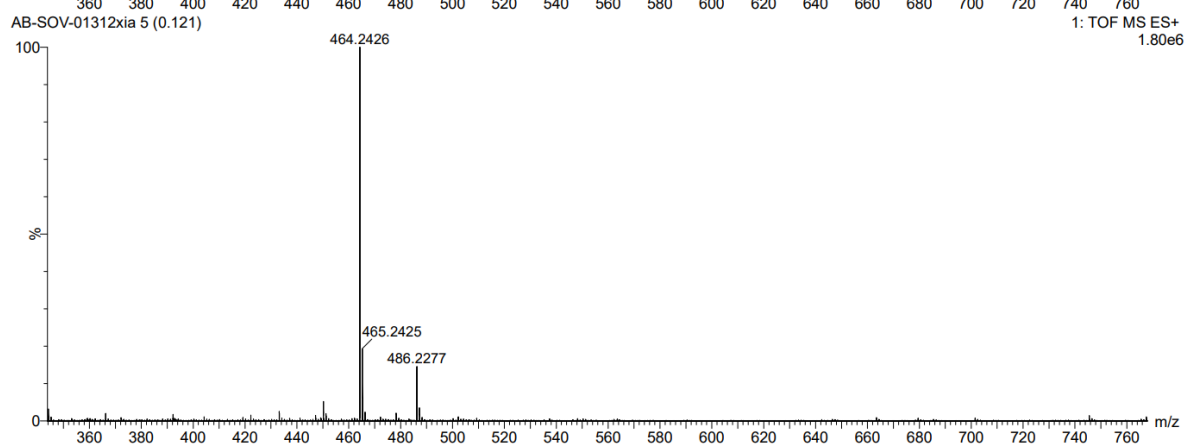

HRMS data of (+)-**5a**



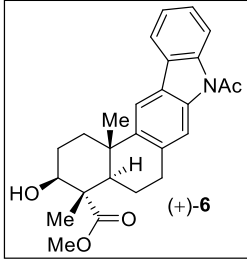

temp.690.fid  
GROUP AB  
AB-AYA-RN0381R in CDCl<sub>3</sub>

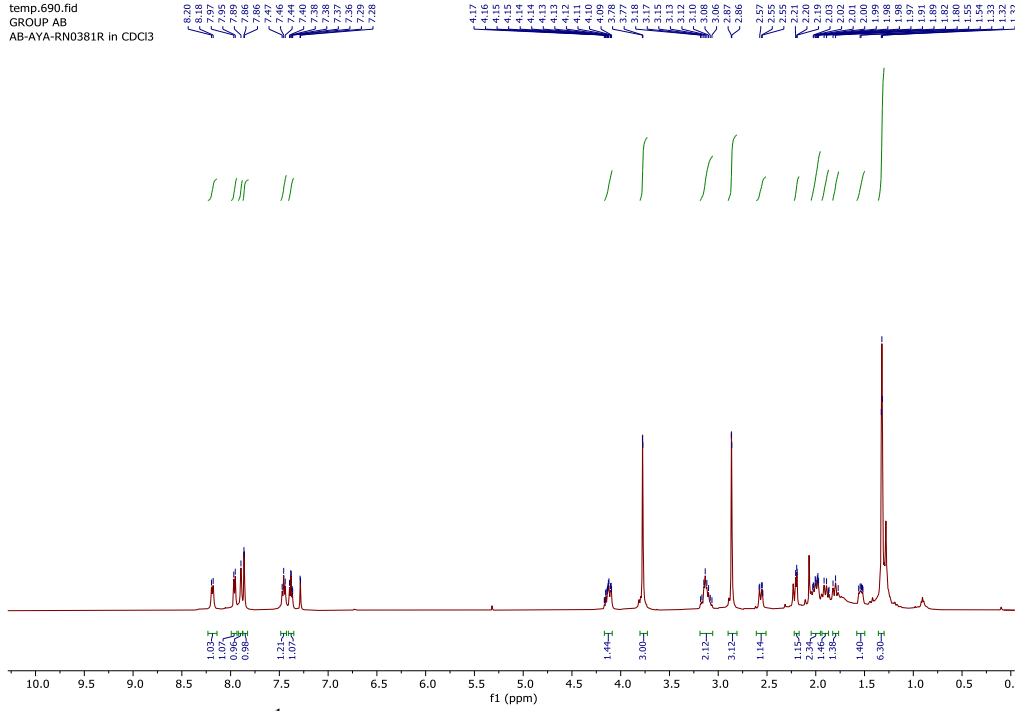

<sup>1</sup>H NMR (500 MHz, CDCl<sub>3</sub>) of (+)-6

temp.691.fid  
GROUP AB  
AB-AYA-RN0381R in CDCl<sub>3</sub>

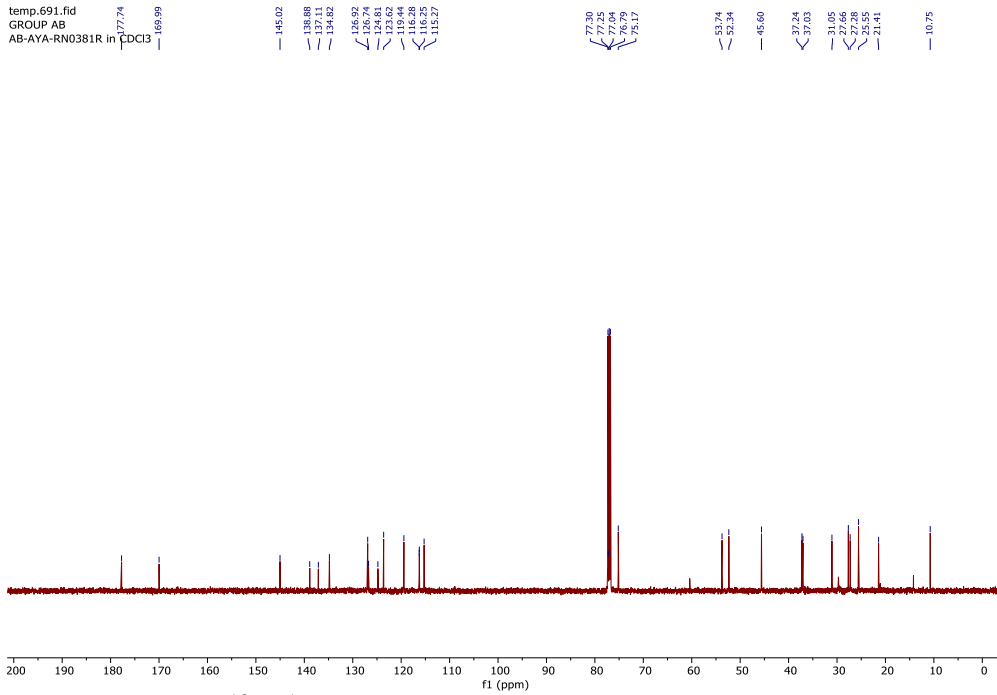

<sup>13</sup>C{<sup>1</sup>H} NMR (125 MHz, CDCl<sub>3</sub>) of (+)-6

# Display Report

## Analysis Info

Analysis Name D:\Data\User data\2022\MAR\lab\_rn\_0381.d  
Method Tune\_pos\_Standard.m  
Sample Name ab\_rn\_0381  
Comment signal dropping issue

Acquisition Date 3/7/2022 11:57:33 AM

Operator IISER Kolkata  
Instrument maXis impact 8282001.00127

## Acquisition Parameter

|             |          |                      |          |                  |           |
|-------------|----------|----------------------|----------|------------------|-----------|
| Source Type | ESI      | Ion Polarity         | Positive | Set Nebulizer    | 0.5 Bar   |
| Focus       | Active   | Set Capillary        | 3400 V   | Set Dry Heater   | 200 °C    |
| Scan Begin  | 50 m/z   | Set End Plate Offset | -500 V   | Set Dry Gas      | 4.0 l/min |
| Scan End    | 1000 m/z | Set Charging Voltage | 2000 V   | Set Divert Valve | Source    |
|             |          | Set Corona           | 0 nA     | Set APCI Heater  | 0 °C      |

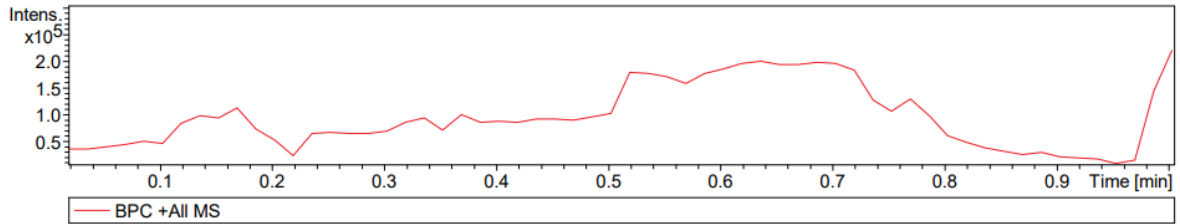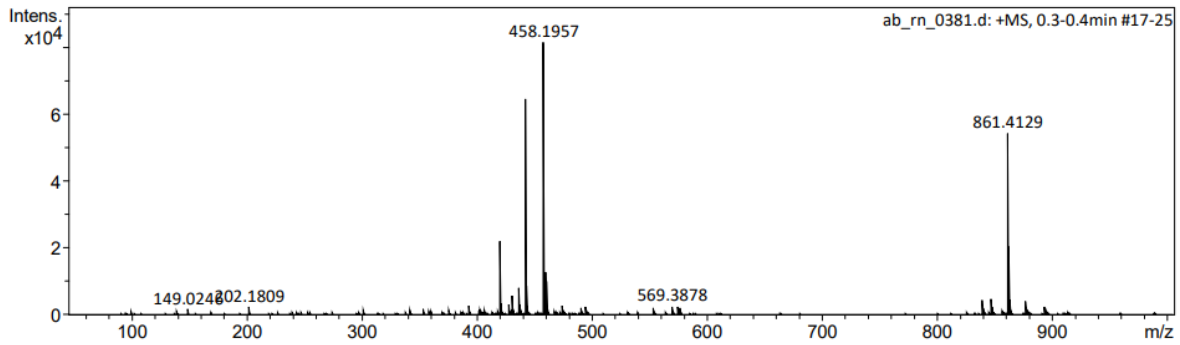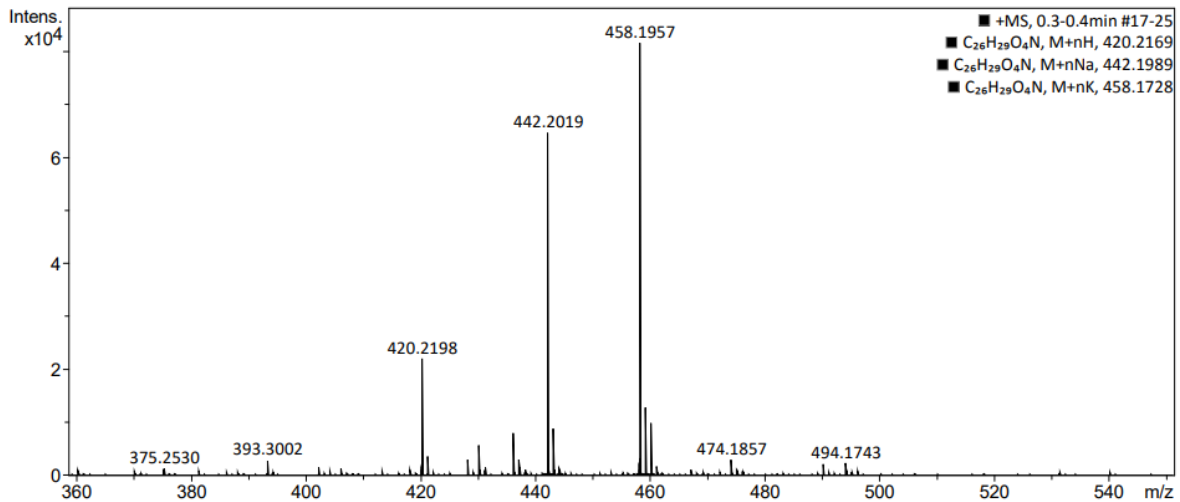

ab\_rn\_0381.d

Bruker Compass DataAnalysis 4.1

printed: 3/7/2022 11:59:59 AM

by: IISER Kolkata

Page 1 of 1

HRMS data of (+)-6

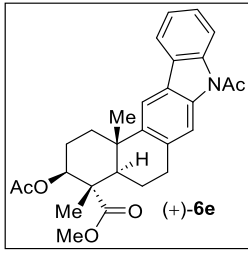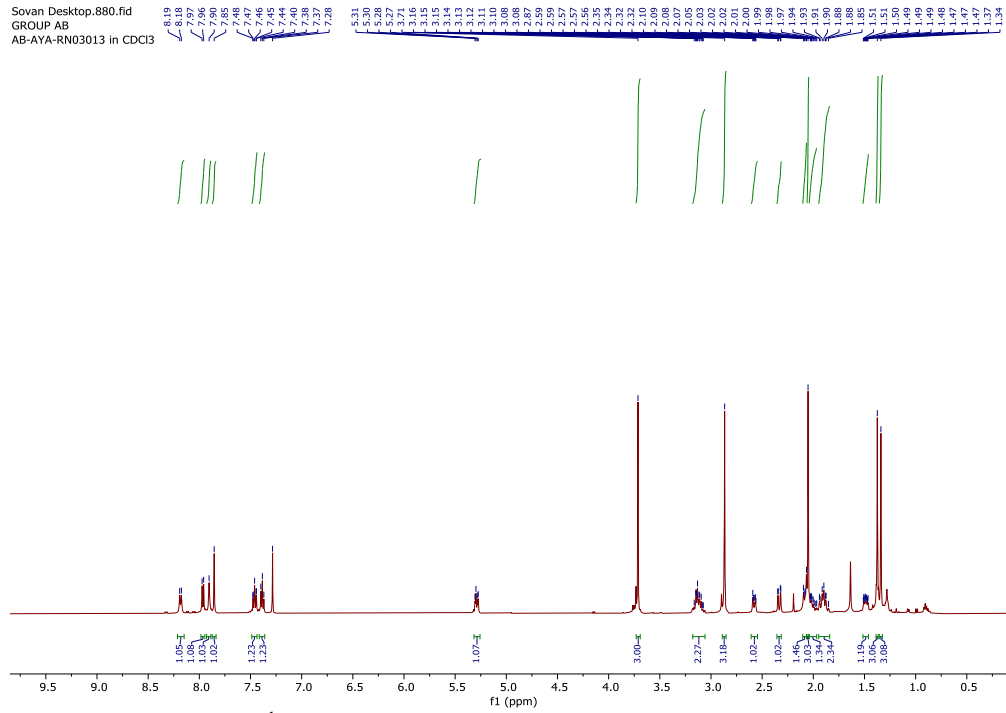

<sup>1</sup>H NMR (500 MHz, CDCl<sub>3</sub>) of (+)-6e

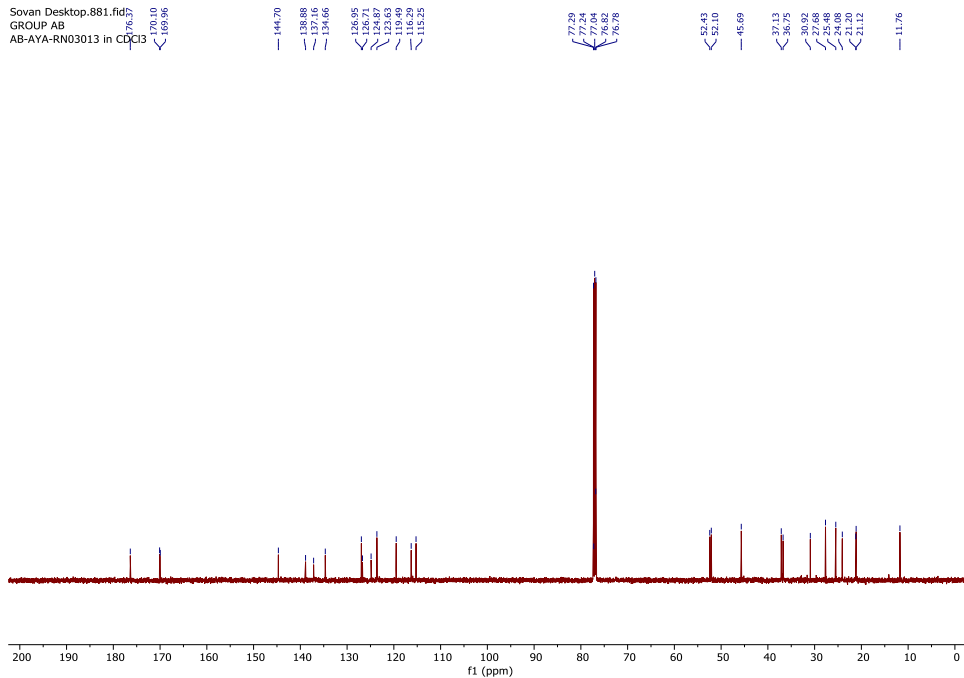

<sup>13</sup>C{<sup>1</sup>H} NMR (125 MHz, CDCl<sub>3</sub>) of (+)-6e

AB28-Mar-2024 14:04:00  
AB-SOV-01278xia (0.053) Is (1.00,1.00) C28H31NO5Na

IISER - KOLKATA

1: TOF MS ES+  
7.26e12

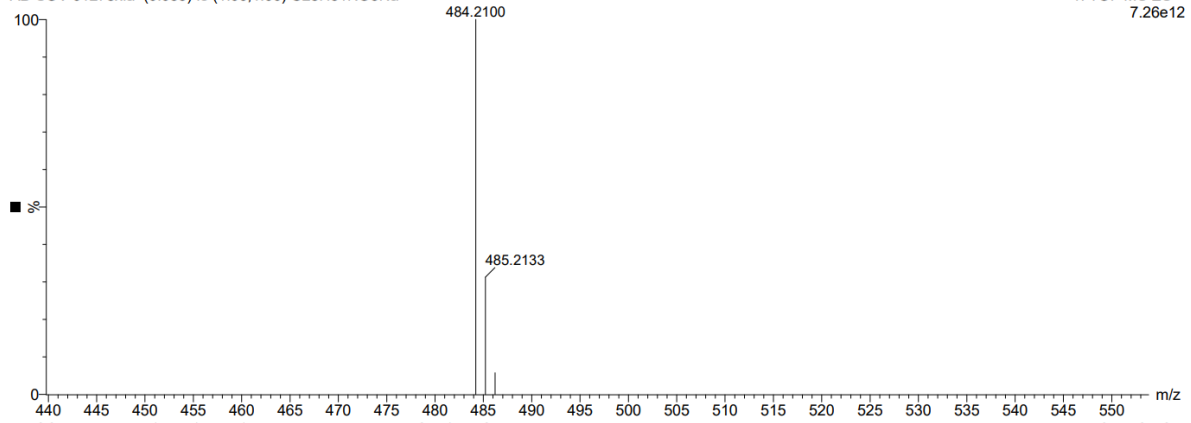

AB-SOV-01278xia 3 (0.087) AM2 (Ar,22000.0,556.28,0.00,LS 10); ABS

1: TOF MS ES+  
3.41e6

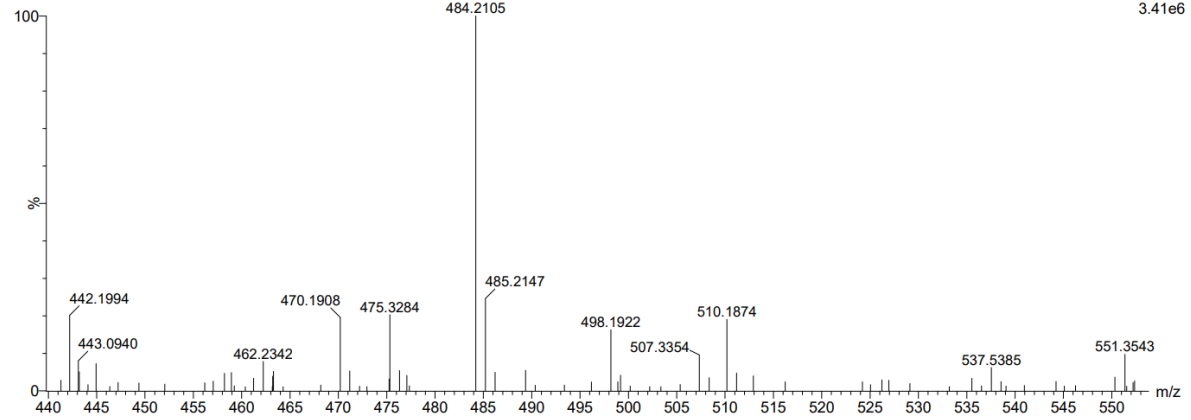

HRMS data of (+)-6e

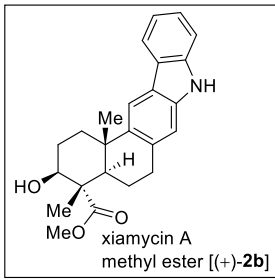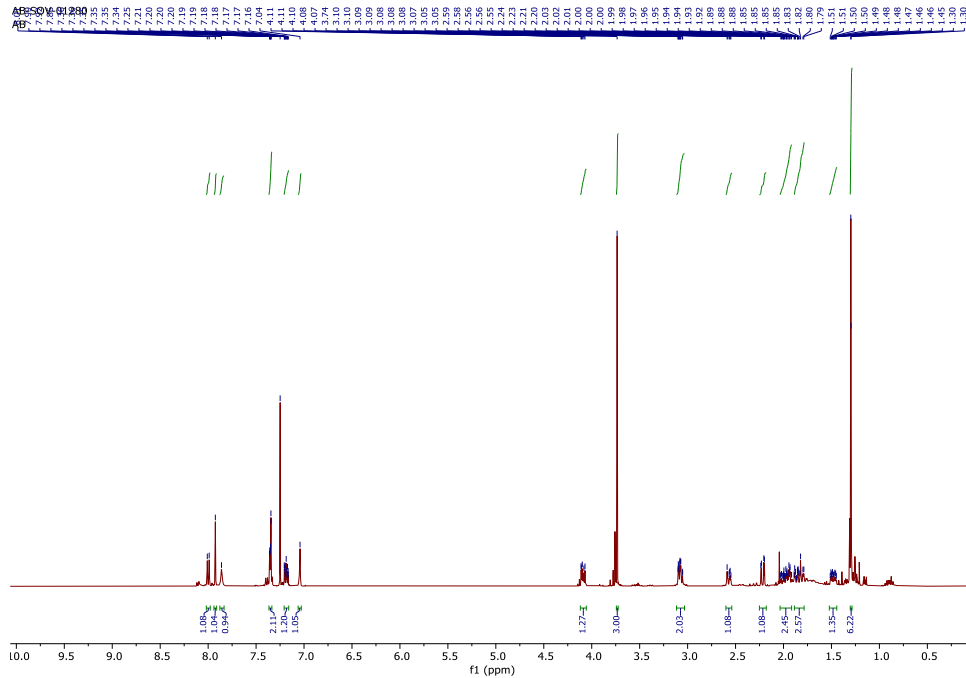

$^1\text{H}$  NMR (500 MHz,  $\text{CDCl}_3$ ) of xiamycin A methylester (+)-2b

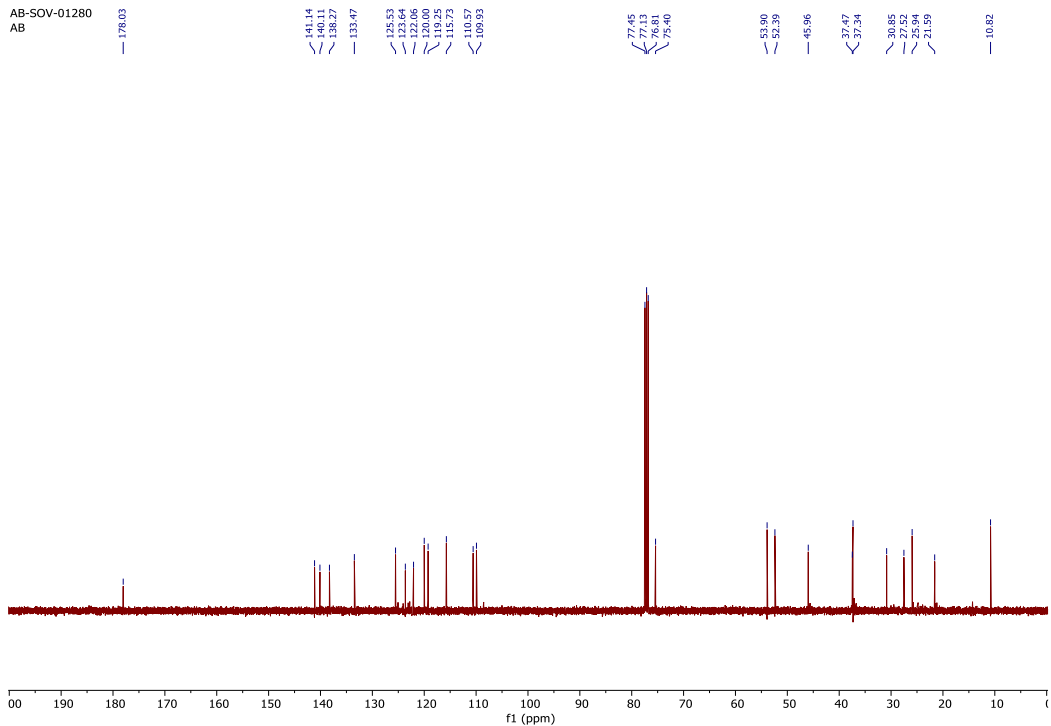

$^{13}\text{C}\{^1\text{H}\}$  NMR (125 MHz,  $\text{CDCl}_3$ ) of xiamycin A methylester (+)-2b

AB28-Mar-2024 12:33:35

IISER - KOLKATA

1: TOF MS ES+  
7.62e12

AB-SOV-01280xia (0.070) Is (1.00,1.00) C<sub>24</sub>H<sub>28</sub>NO<sub>3</sub>

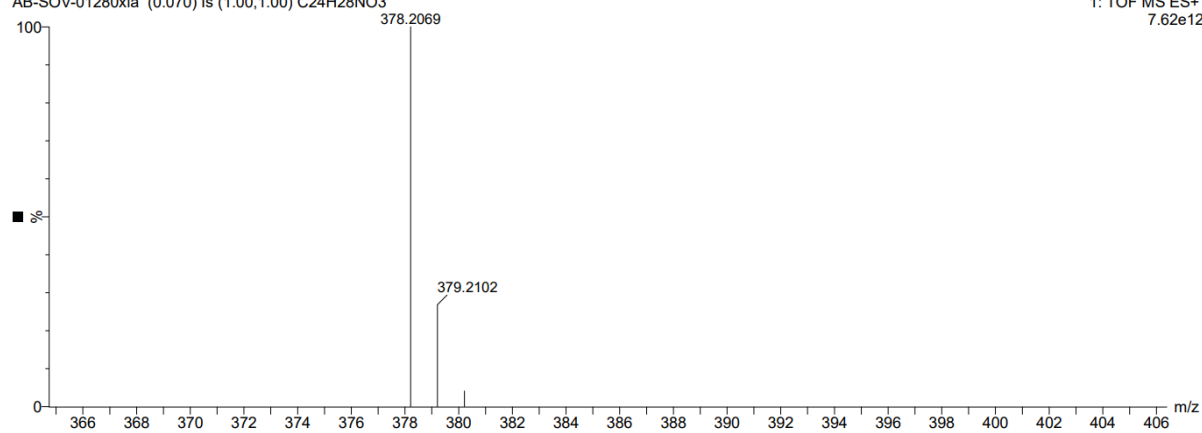

AB-SOV-01280xia 2 (0.070)

1: TOF MS ES+  
5.02e6

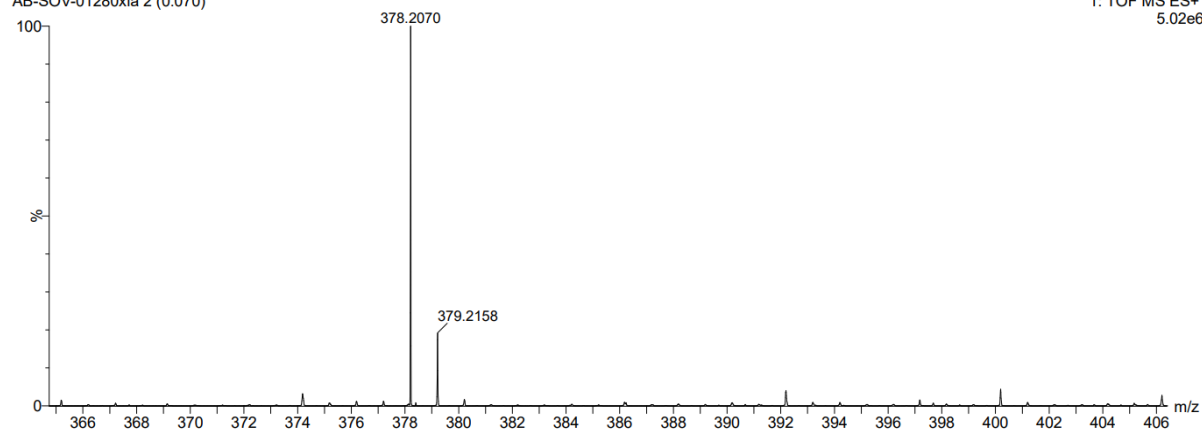

HRMS data of xiamycin A methylester (+)-**2b**

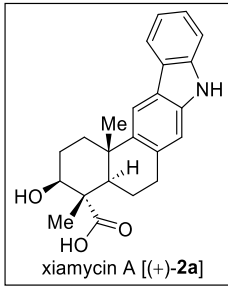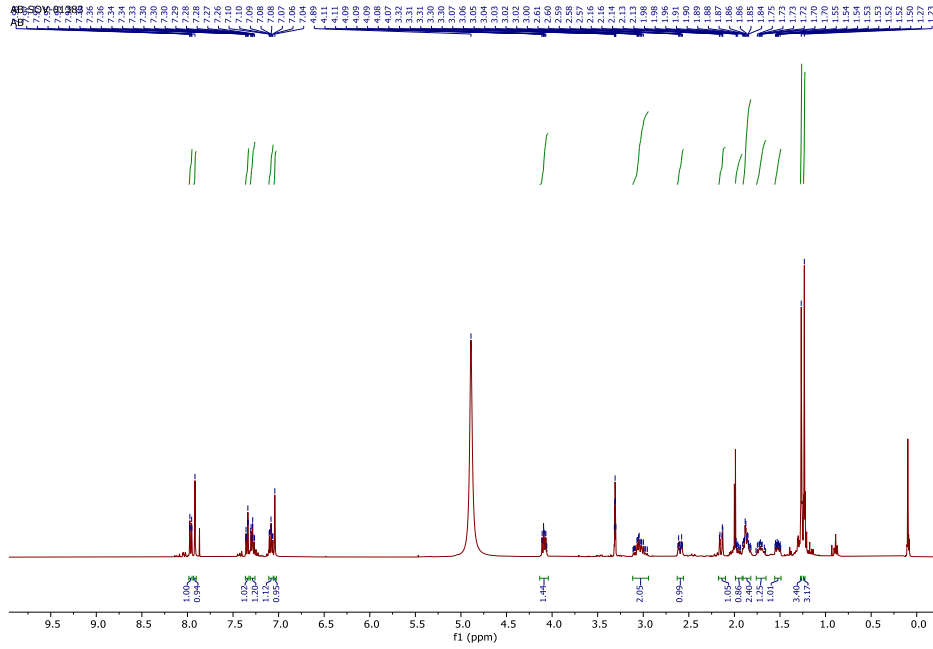

<sup>1</sup>H NMR (400 MHz, CD<sub>3</sub>OD) of xiamycin A [(+)-2a]

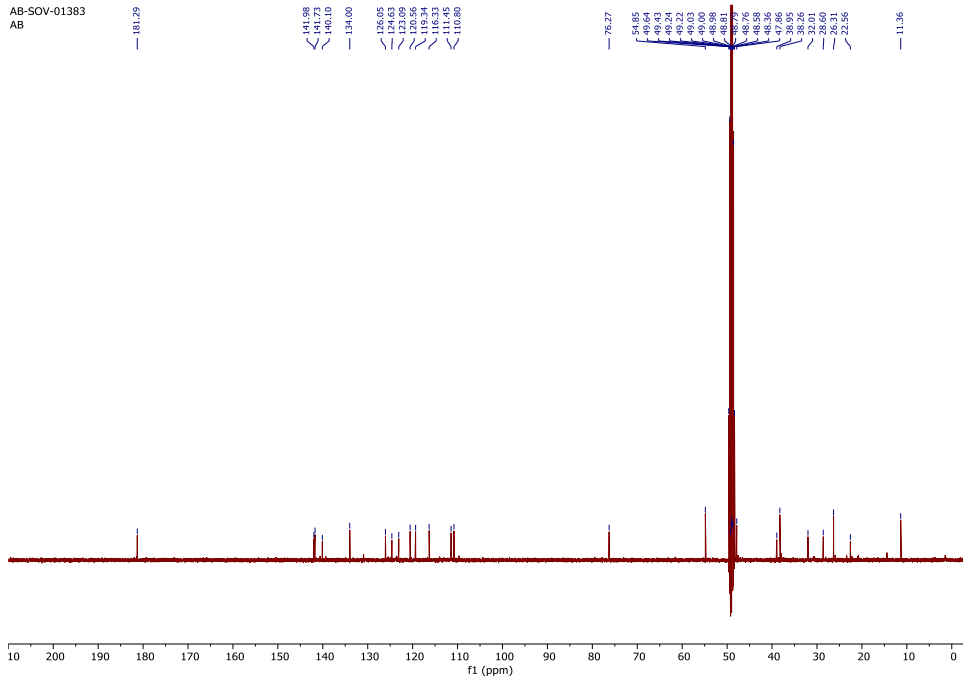

<sup>13</sup>C {<sup>1</sup>H} NMR (100 MHz, CD<sub>3</sub>OD) of xiamycin A [(+)-2a]

# Display Report

## Analysis Info

Analysis Name D:\Data\User data\2024\JAN\lab\_sov\_01385.d  
Method Tune\_pos\_Standard\_JAN2024.new.m  
Sample Name ab\_sov\_01385  
Comment

Acquisition Date 1/16/2024 12:58:35 PM

Operator IISER Kolkata  
Instrument maXis impact 8282001.00127

## Acquisition Parameter

|             |          |                      |          |                  |           |
|-------------|----------|----------------------|----------|------------------|-----------|
| Source Type | ESI      | Ion Polarity         | Positive | Set Nebulizer    | 0.4 Bar   |
| Focus       | Active   | Set Capillary        | 4500 V   | Set Dry Heater   | 200 °C    |
| Scan Begin  | 50 m/z   | Set End Plate Offset | -500 V   | Set Dry Gas      | 4.0 l/min |
| Scan End    | 1000 m/z | Set Charging Voltage | 2000 V   | Set Divert Valve | Source    |
|             |          | Set Corona           | 0 nA     | Set APCI Heater  | 0 °C      |

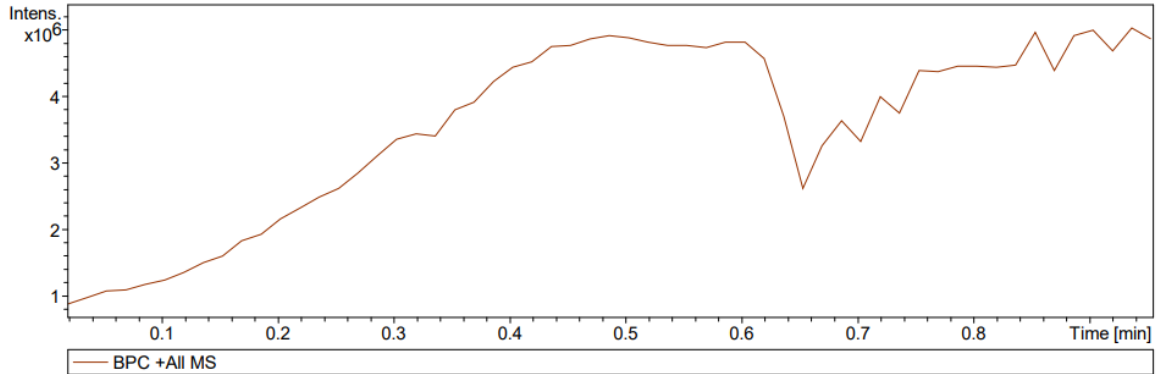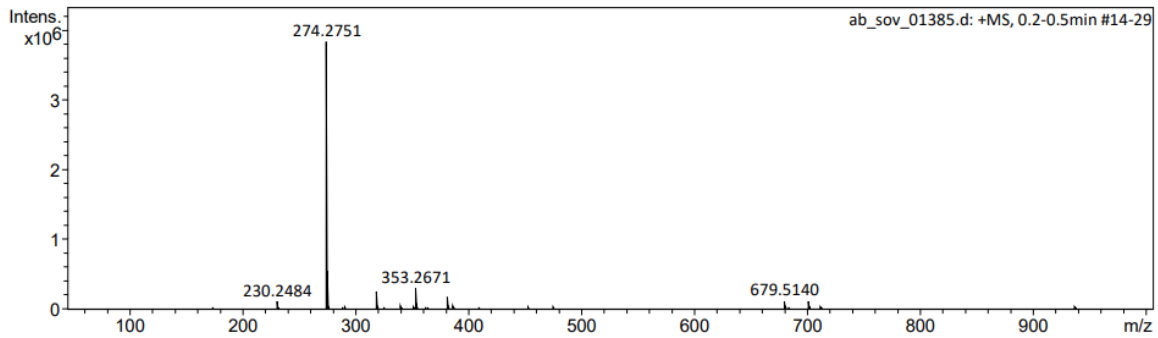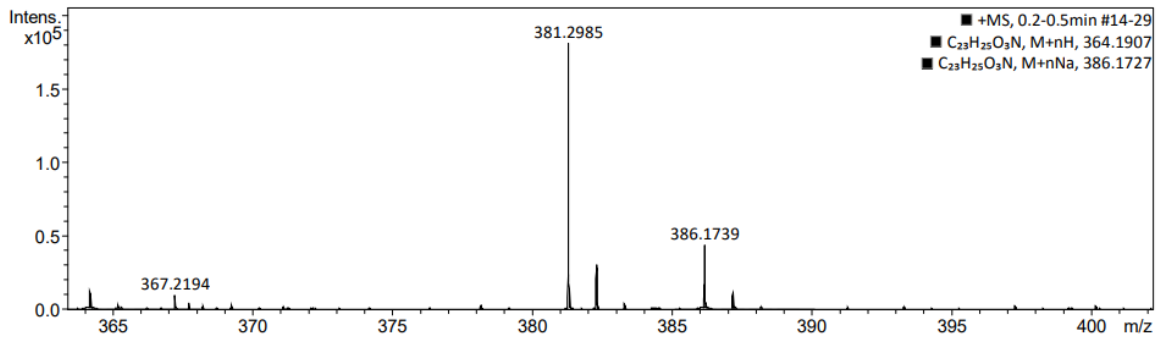

ab\_sov\_01385.d

Bruker Compass DataAnalysis 4.1

printed: 1/16/2024 1:02:11 PM

by: IISER Kolkata

Page 1 of 1

HRMS data of xiamycin A [(+)-2a]



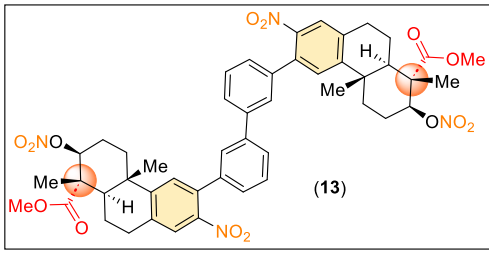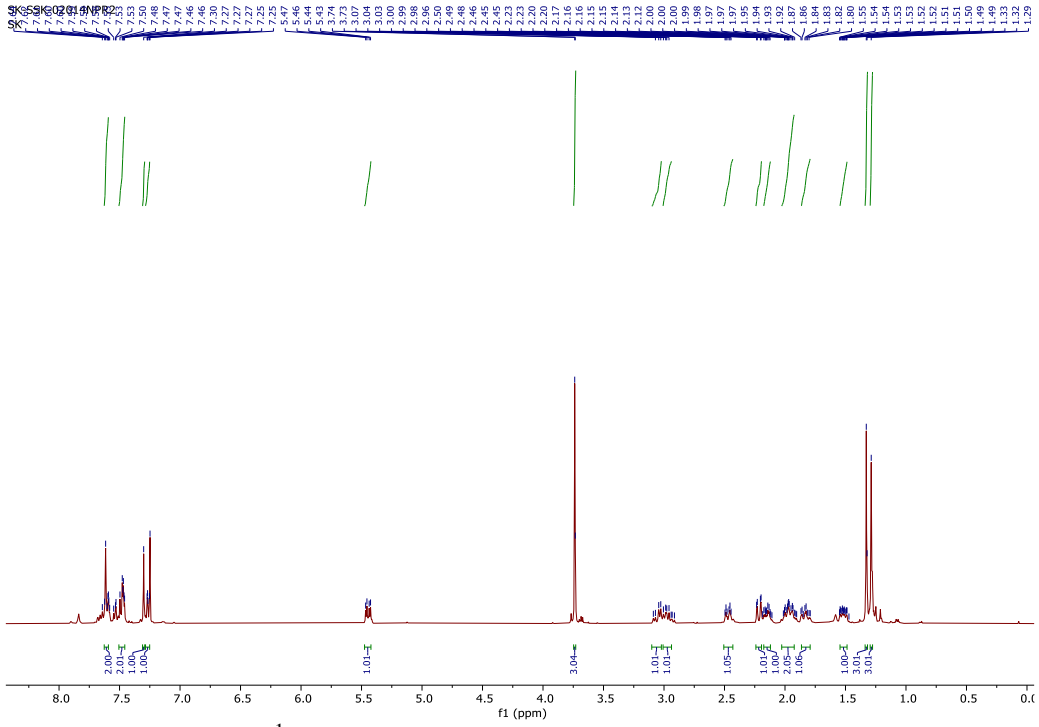

$^1\text{H}$  NMR (500 MHz,  $\text{CDCl}_3$ ) of (+)-13

Sovan Nmr. 410.fid  
GROUP AB  
AB-SOV-02014NPR2 in  $\text{CDCl}_3$

152.76  
146.88  
141.13  
138.41  
135.56  
134.10  
128.36  
127.19  
126.98  
124.84  
85.48  
77.30  
77.04  
76.79  
52.85  
51.43  
46.17  
37.53  
37.23  
36.93  
32.78  
24.87  
22.62  
20.26  
11.73

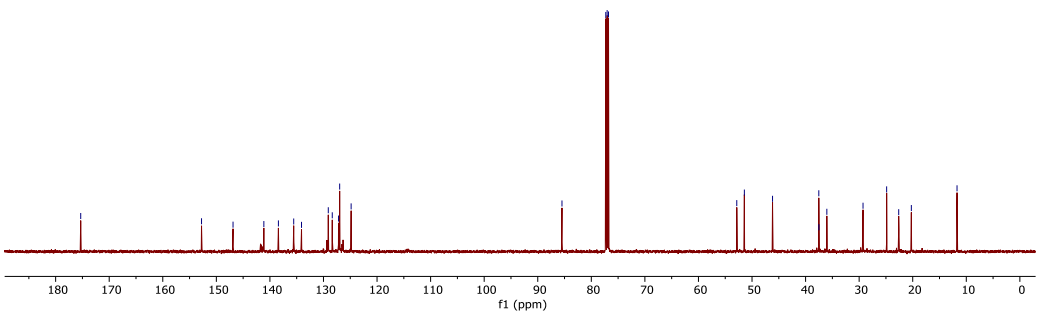

$^{13}\text{C}\{^1\text{H}\}$  NMR (125 MHz,  $\text{CDCl}_3$ ) of (+)-13

AB29-Apr-2024 15:44:16  
AB-SOV-02014NPR2 (0.053) Is (1.00,1.00) C<sub>48</sub>H<sub>50</sub>N<sub>4</sub>O<sub>14</sub>NH<sub>4</sub>

IISER - KOLKATA

1: TOF MS ES+  
5.63e12

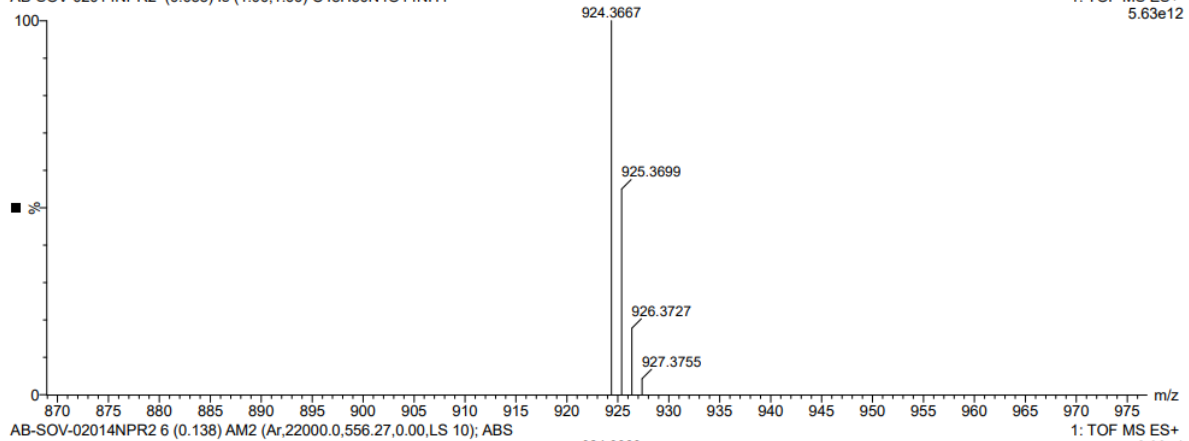

AB-SOV-02014NPR2 6 (0.138) AM2 (Ar,22000.0,556.27,0.00,LS 10); ABS

1: TOF MS ES+  
2.38e4

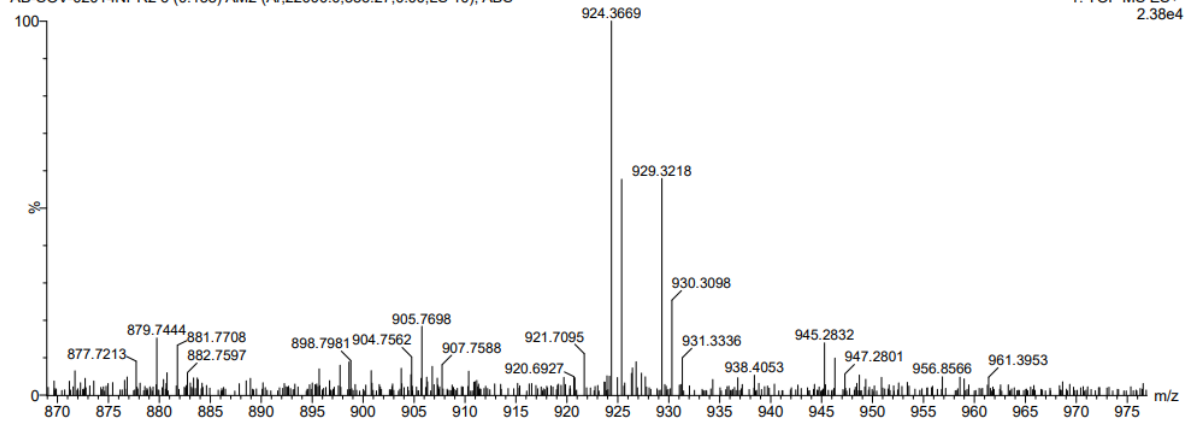

HRMS data of (+)-**13**

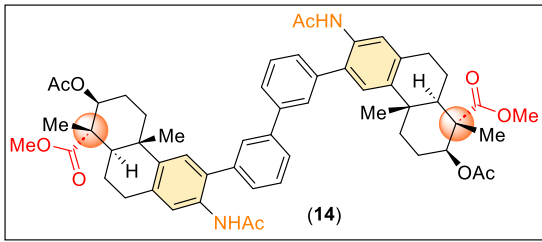

AB-SOV-02017  
AB

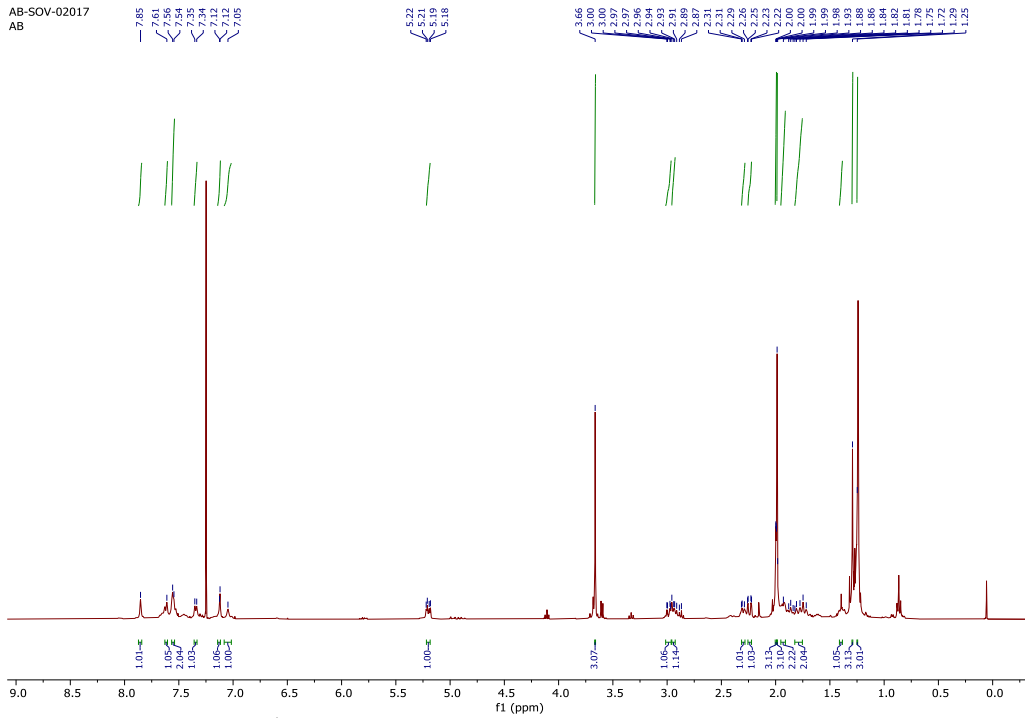

$^1\text{H}$  NMR (500 MHz,  $\text{CDCl}_3$ ) of (+)-14

AB-SOV-0217  
AB

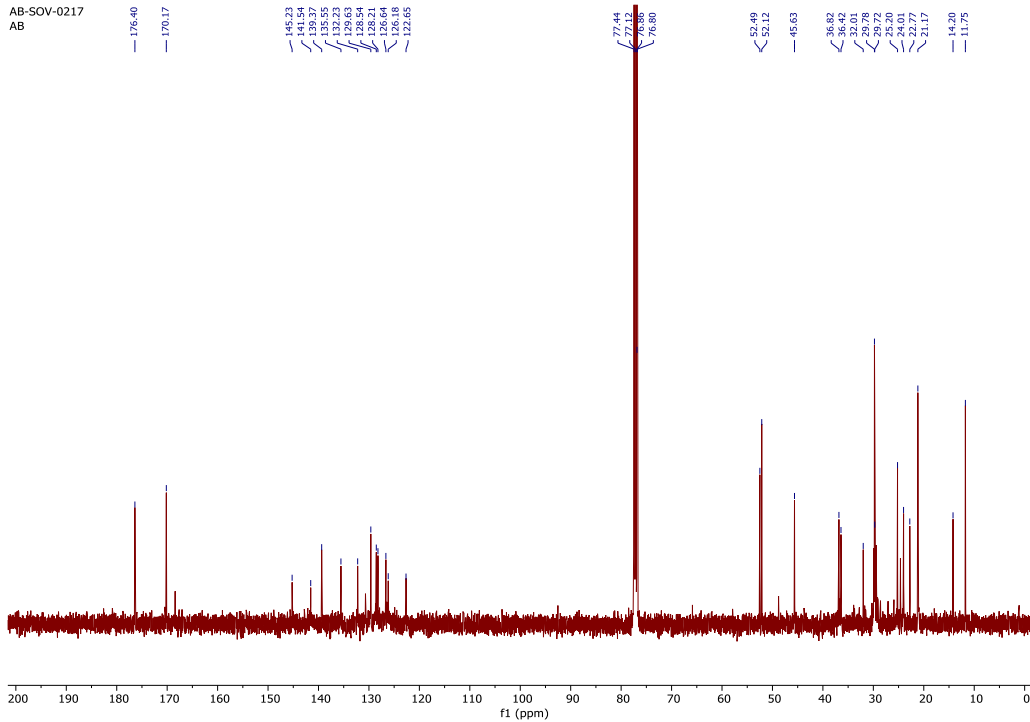

$^{13}\text{C}\{^1\text{H}\}$  NMR (125 MHz,  $\text{CDCl}_3$ ) of (+)-14

AB22-Apr-2024 13:10:19  
AB-SOV-02017 (0.053) Is (1.00,1.00) C56H65N2O10

IISER - KOLKATA

1: TOF MS ES+  
5.26e12

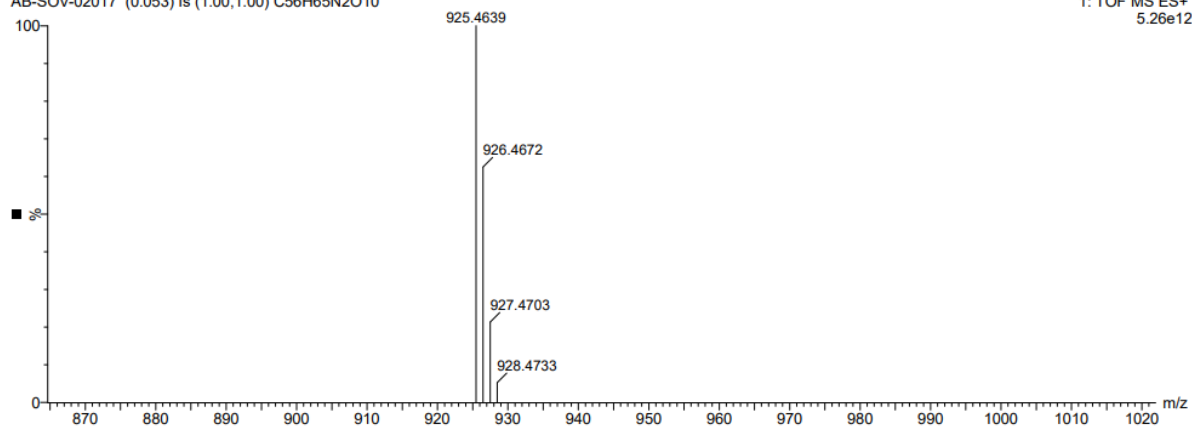

AB-SOV-02017 7 (0.155) AM2 (Ar,22000.0,556.28,0.00,LS 10); ABS

1: TOF MS ES+  
9.22e4

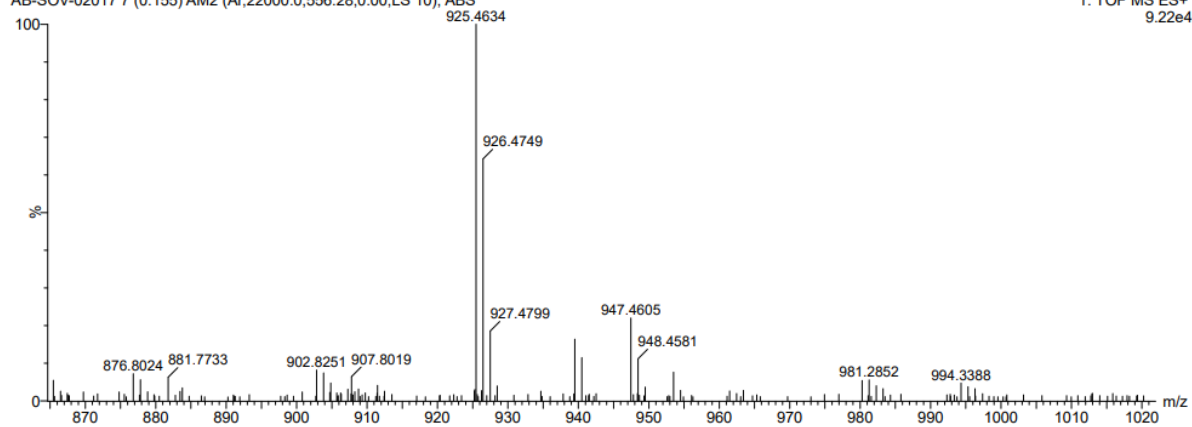

HRMS data of (+)-14

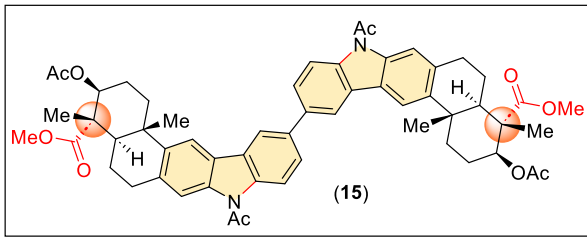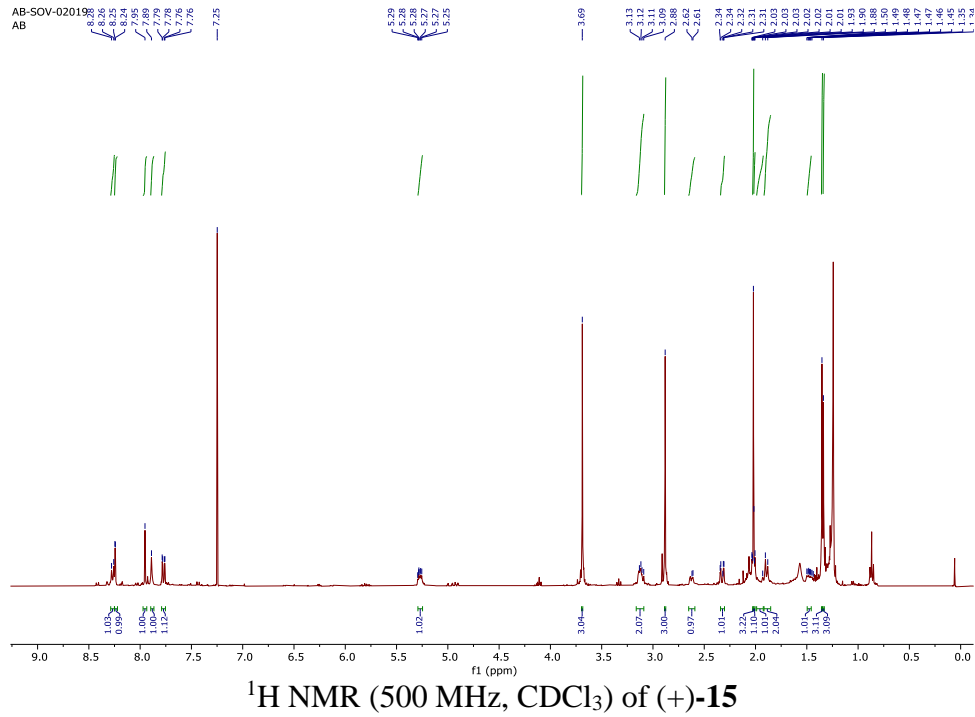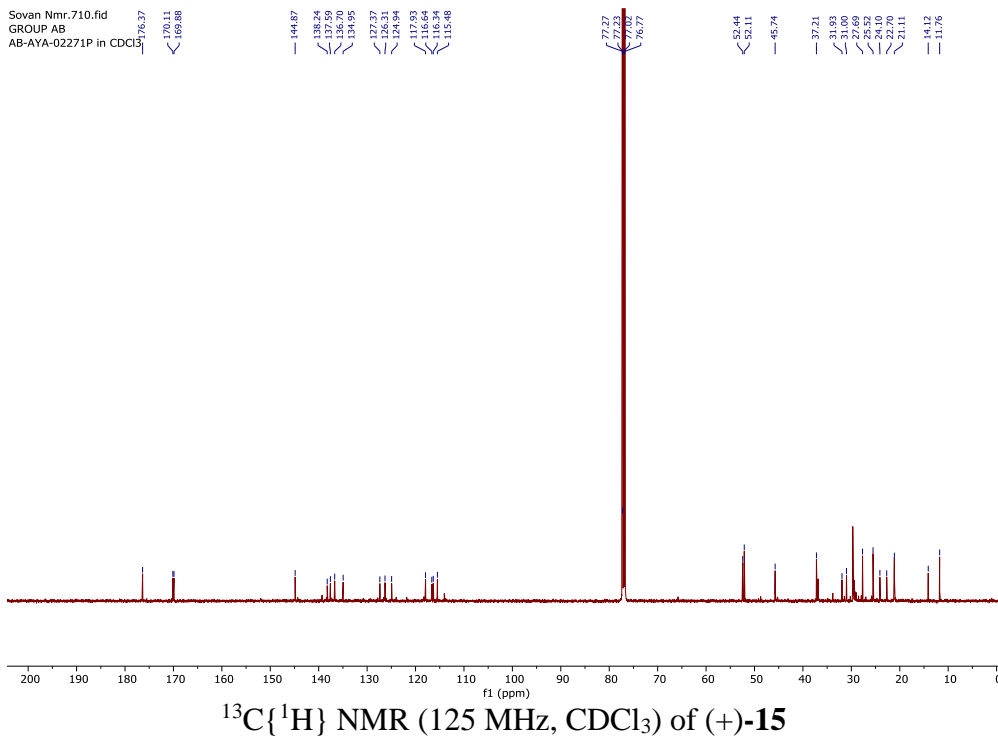

SKD24-Apr-202416:31:54  
AB-SN-02019a1 (0.053) Is (1.00,1.00) C<sub>56</sub>H<sub>61</sub>N<sub>2</sub>O<sub>10</sub>

IISER - KOLKATA

1: TOF MS ES+  
5.27e12

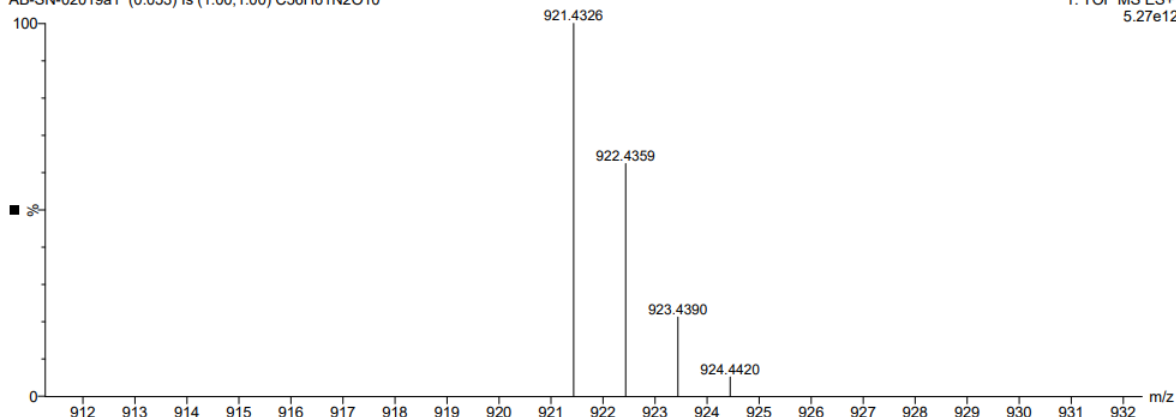

AB-SN-02019a1 4 (0.104) AM2 (Ar,22000.0,556.28,0.00,LS 10); ABS

1: TOF MS ES+  
1.42e5

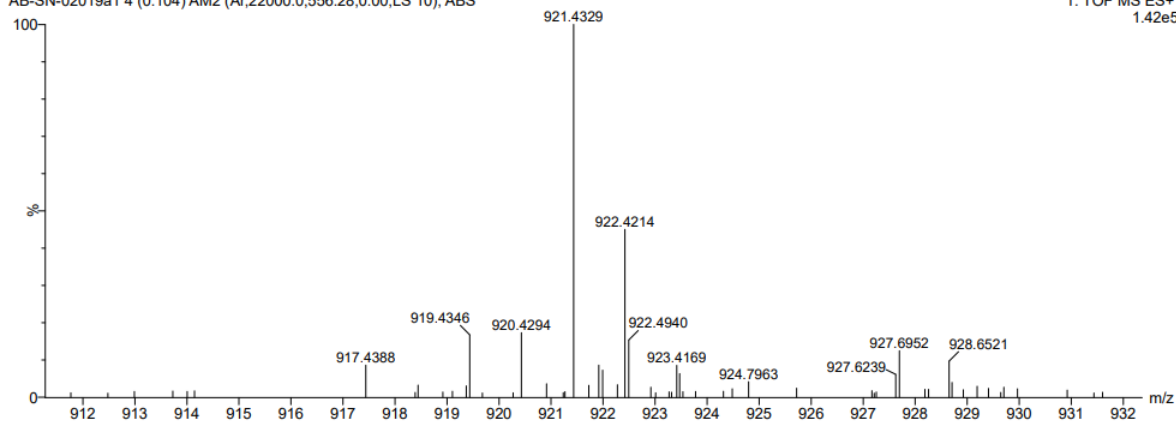

HRMS data of (+)-15

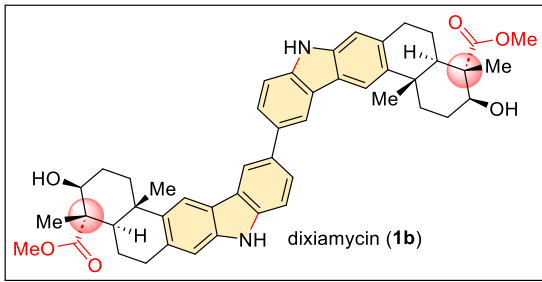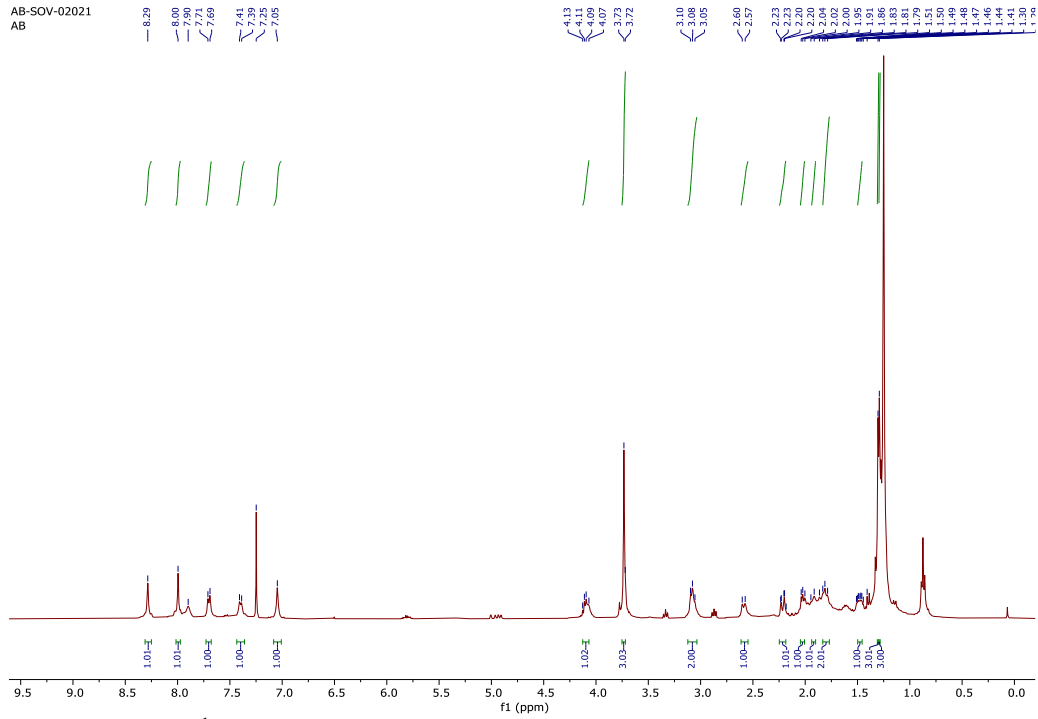

<sup>1</sup>H NMR (400 MHz, CDCl<sub>3</sub>) of Compound (+)-1b

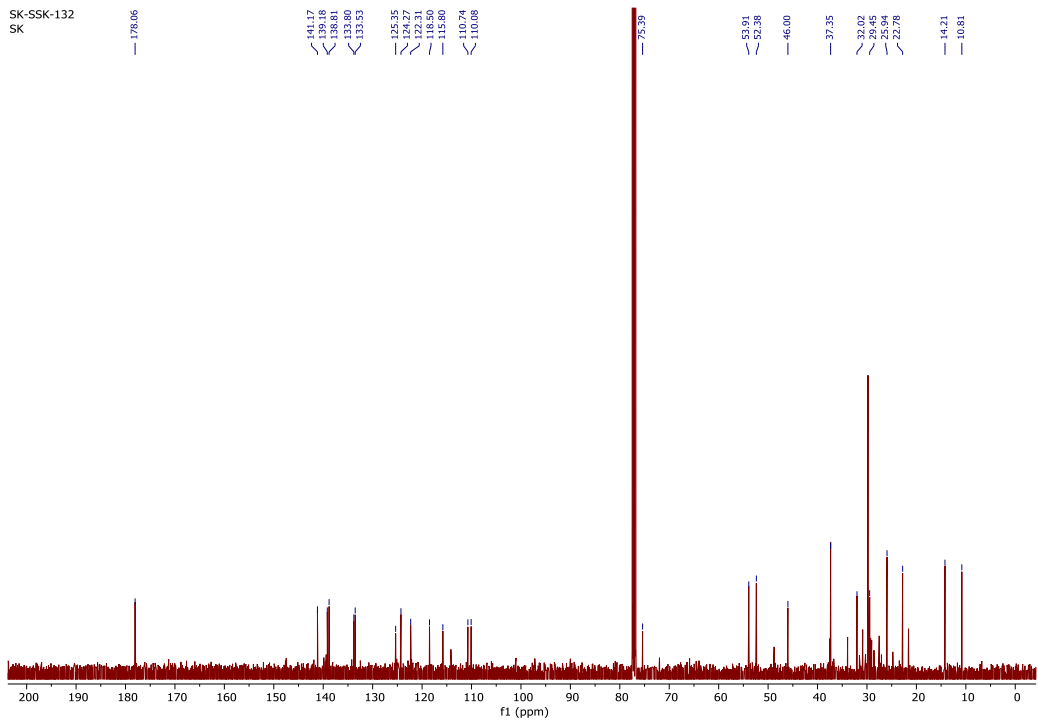

<sup>13</sup>C{<sup>1</sup>H} NMR (125 MHz, CDCl<sub>3</sub>) of compound (+)-1b

AB29-Apr-2024 15:45:48

AB-SOV-02021 (0.053) Is (1.00,1.00) C<sub>48</sub>H<sub>53</sub>N<sub>2</sub>O<sub>6</sub>

IISER - KOLKATA

1: TOF MS ES+  
5.80e12

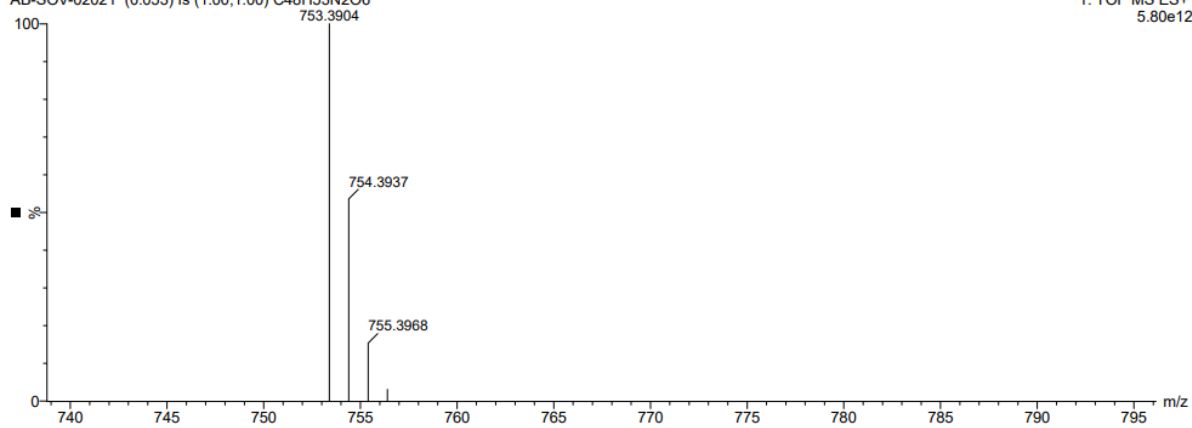

AB-SOV-02021 2 (0.070) AM2 (Ar,22000.0,556.27,0.00,LS 10); ABS

1: TOF MS ES+  
3.43e5

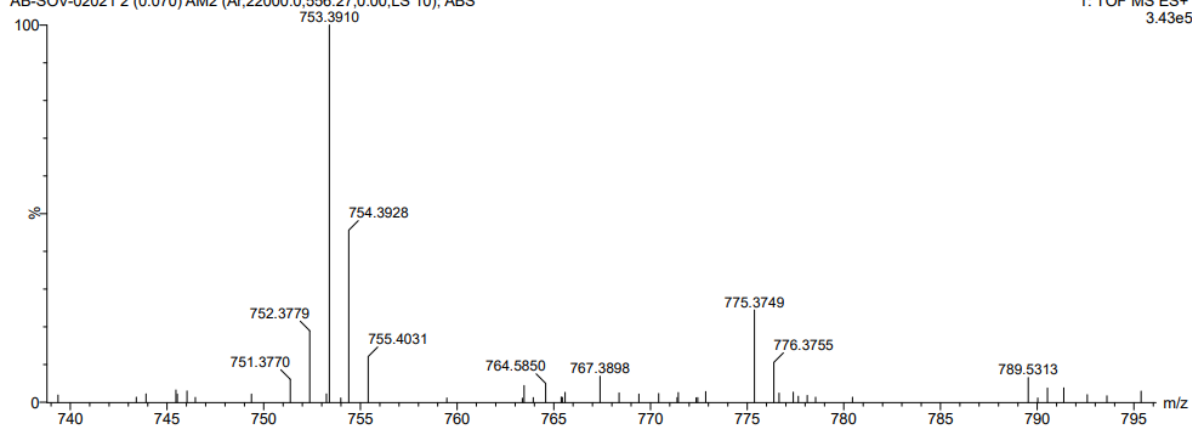

HRMS data of (+)-**1b**



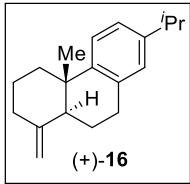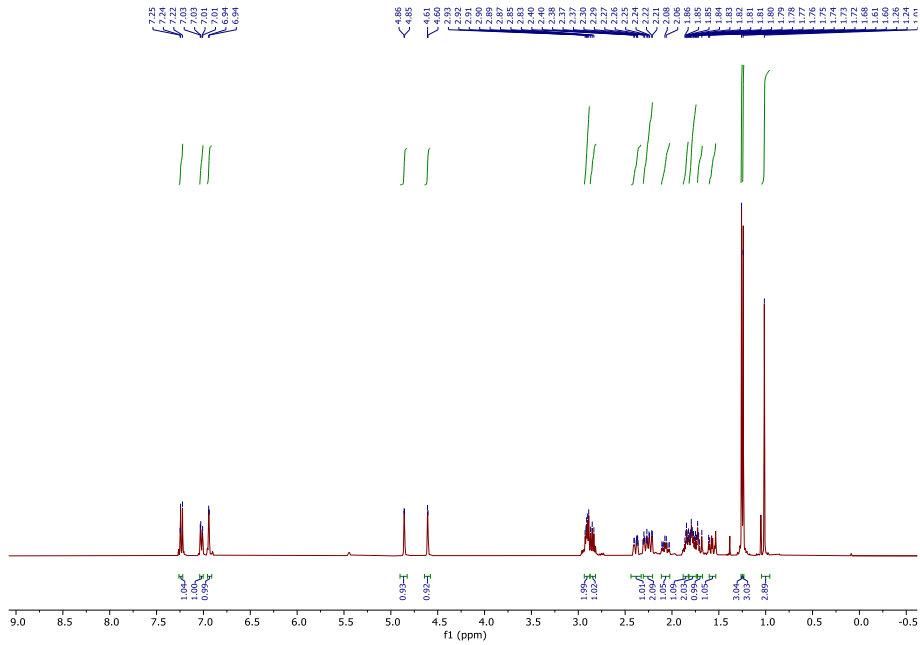

$^1\text{H}$  NMR (400 MHz,  $\text{CDCl}_3$ ) of compound (+)-16

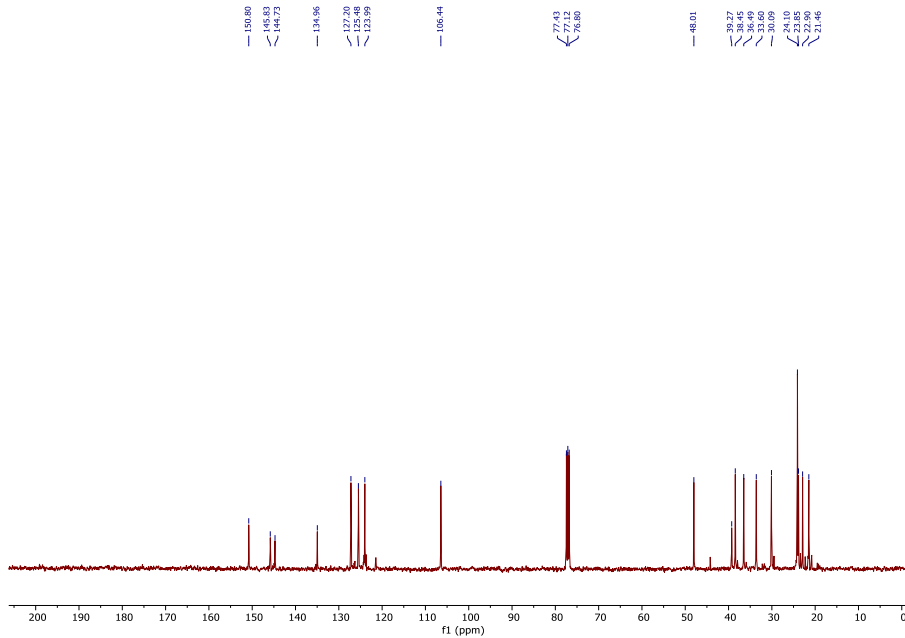

$^{13}\text{C}\{^1\text{H}\}$  NMR (100 MHz,  $\text{CDCl}_3$ ) of compound (+)-16

# Display Report

## Analysis Info

Analysis Name D:\Data\User data\2021\DEC\AB\_MM\_01\_212.d  
Method Tune\_pos\_Standard.m  
Sample Name AB\_MM\_01\_212  
Comment

Acquisition Date 12/14/2021 3:02:21 PM  
Operator IISER Kolkata  
Instrument maXis impact 8282001.00127

## Acquisition Parameter

|             |          |                      |          |                  |           |
|-------------|----------|----------------------|----------|------------------|-----------|
| Source Type | ESI      | Ion Polarity         | Positive | Set Nebulizer    | 0.5 Bar   |
| Focus       | Active   | Set Capillary        | 3400 V   | Set Dry Heater   | 200 °C    |
| Scan Begin  | 50 m/z   | Set End Plate Offset | -500 V   | Set Dry Gas      | 4.0 l/min |
| Scan End    | 1000 m/z | Set Charging Voltage | 2000 V   | Set Divert Valve | Source    |
|             |          | Set Corona           | 0 nA     | Set APCI Heater  | 0 °C      |

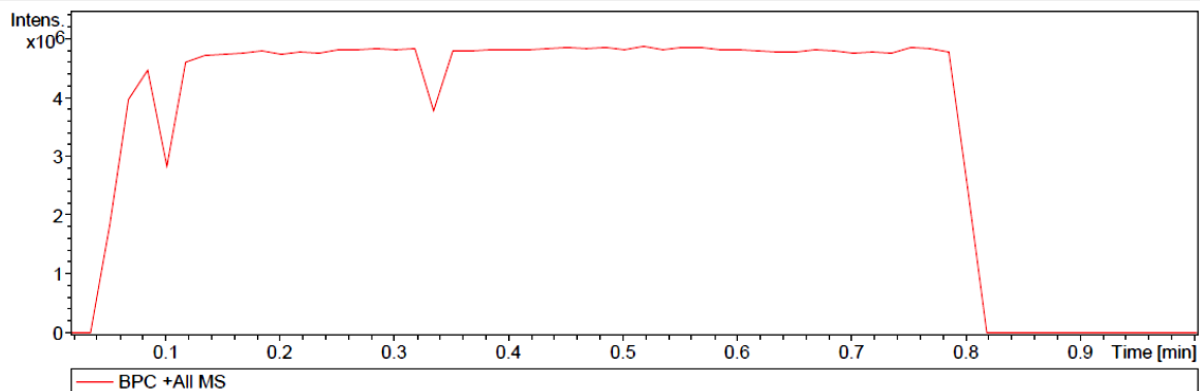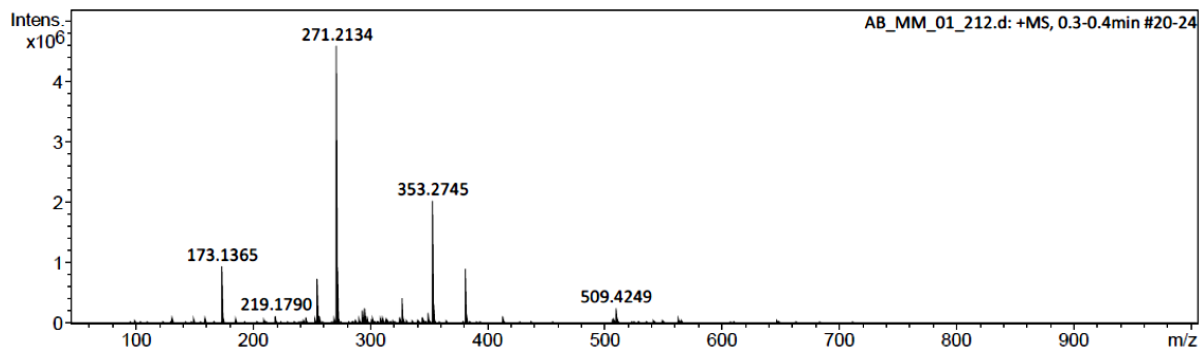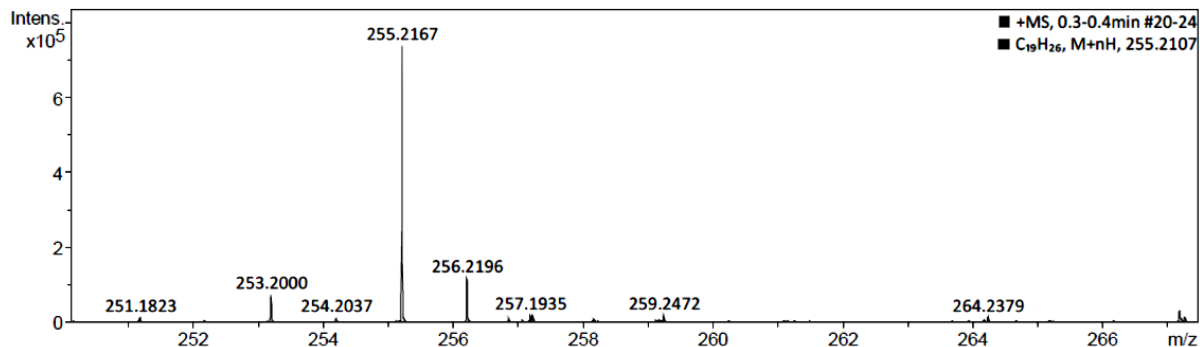

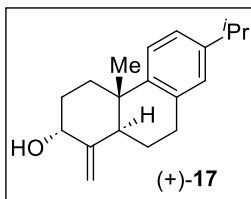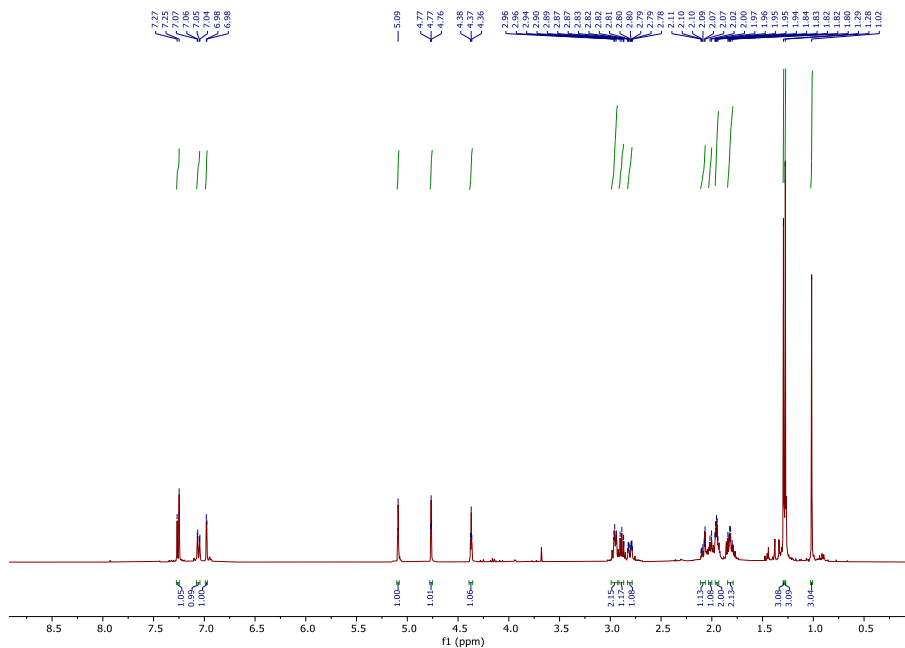

$^1\text{H}$  NMR (400 MHz,  $\text{CDCl}_3$ ) of compound (+)-17

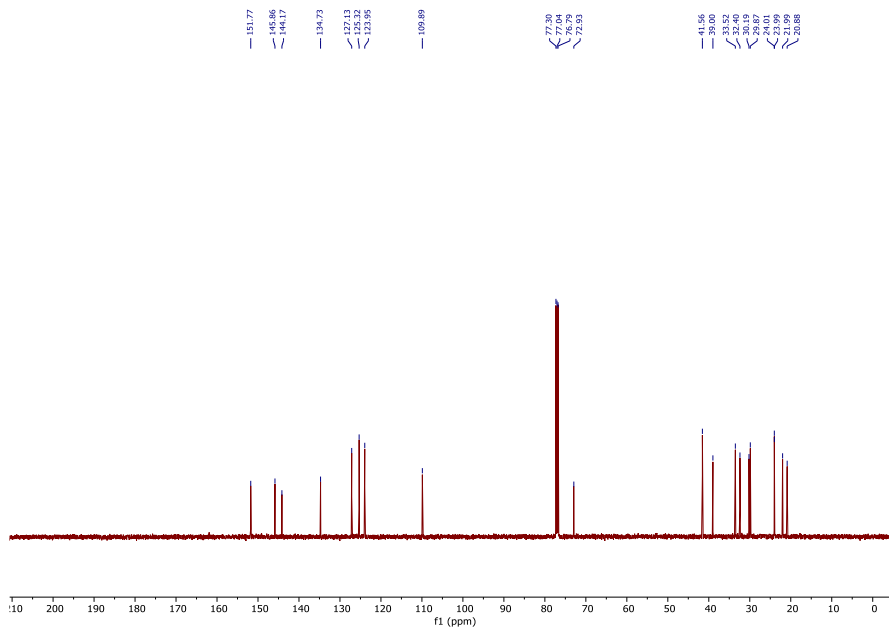

$^{13}\text{C}\{^1\text{H}\}$  NMR (125 MHz,  $\text{CDCl}_3$ ) of compound (+)-17

# Display Report

## Analysis Info

Analysis Name D:\Data\User data\2021\DEC\lab\_SOV\_01139.d  
Method Tune\_pos\_Standard.m  
Sample Name ab\_SOV\_01139  
Comment

Acquisition Date 12/14/2021 11:26:04 AM

Operator IISER Kolkata  
Instrument maXis impact 8282001.00127

## Acquisition Parameter

|             |          |                      |          |                  |           |
|-------------|----------|----------------------|----------|------------------|-----------|
| Source Type | ESI      | Ion Polarity         | Positive | Set Nebulizer    | 0.5 Bar   |
| Focus       | Active   | Set Capillary        | 3400 V   | Set Dry Heater   | 200 °C    |
| Scan Begin  | 50 m/z   | Set End Plate Offset | -500 V   | Set Dry Gas      | 4.0 l/min |
| Scan End    | 1000 m/z | Set Charging Voltage | 2000 V   | Set Divert Valve | Source    |
|             |          | Set Corona           | 0 nA     | Set APCI Heater  | 0 °C      |

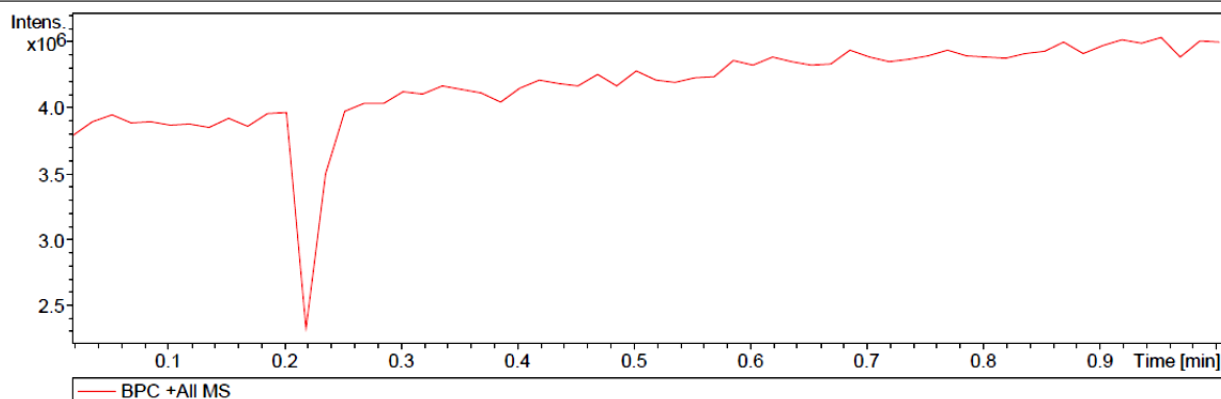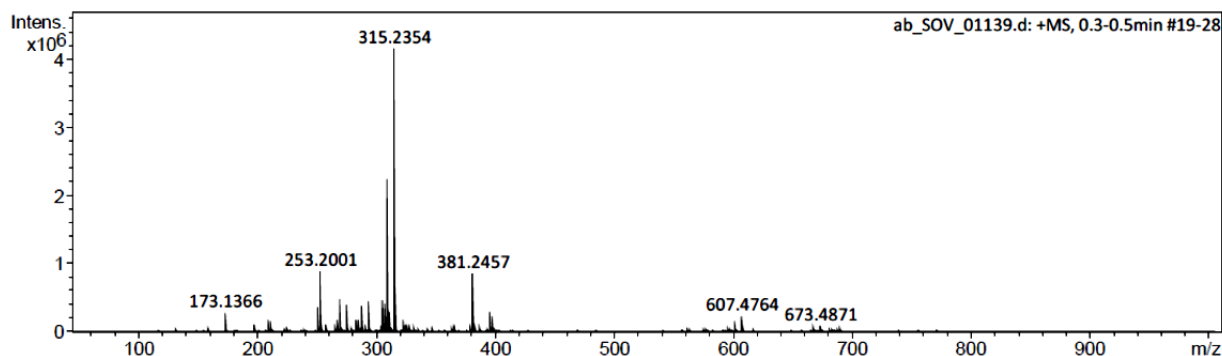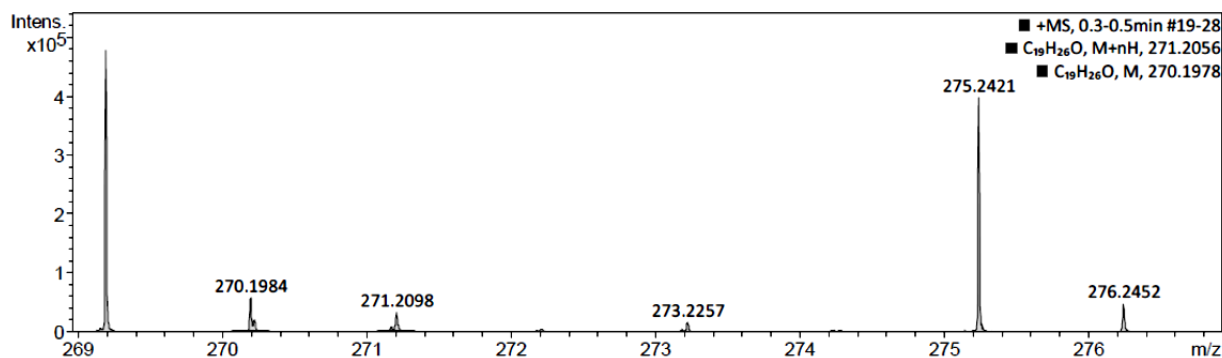



# Display Report

## Analysis Info

Analysis Name D:\Data\User data\2022\MAY\ab\_m\_03082.d  
Method Tune\_pos\_Standard.m  
Sample Name ab\_m\_03082  
Comment

Acquisition Date 5/12/2022 12:01:20 PM  
Operator IISER Kolkata  
Instrument maXis impact 8282001.00127

## Acquisition Parameter

|             |          |                      |          |                  |           |
|-------------|----------|----------------------|----------|------------------|-----------|
| Source Type | ESI      | Ion Polarity         | Positive | Set Nebulizer    | 0.5 Bar   |
| Focus       | Active   | Set Capillary        | 3400 V   | Set Dry Heater   | 200 °C    |
| Scan Begin  | 50 m/z   | Set End Plate Offset | -500 V   | Set Dry Gas      | 4.0 l/min |
| Scan End    | 1000 m/z | Set Charging Voltage | 2000 V   | Set Divert Valve | Source    |
|             |          | Set Corona           | 0 nA     | Set APCI Heater  | 0 °C      |

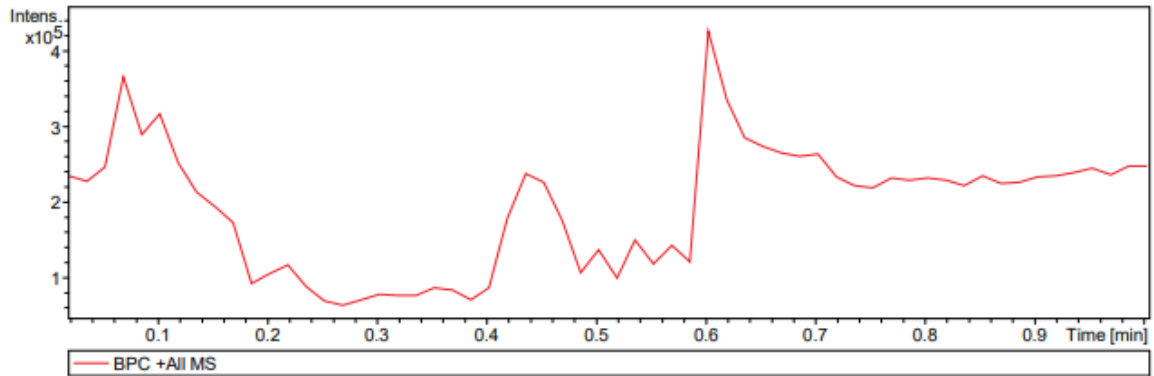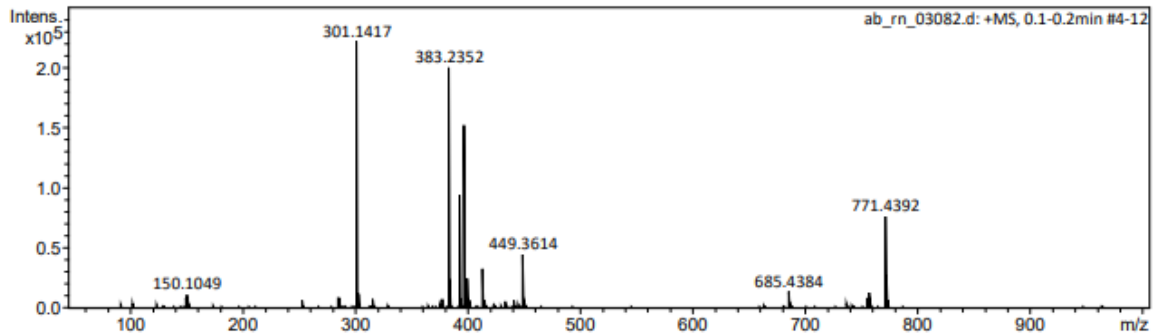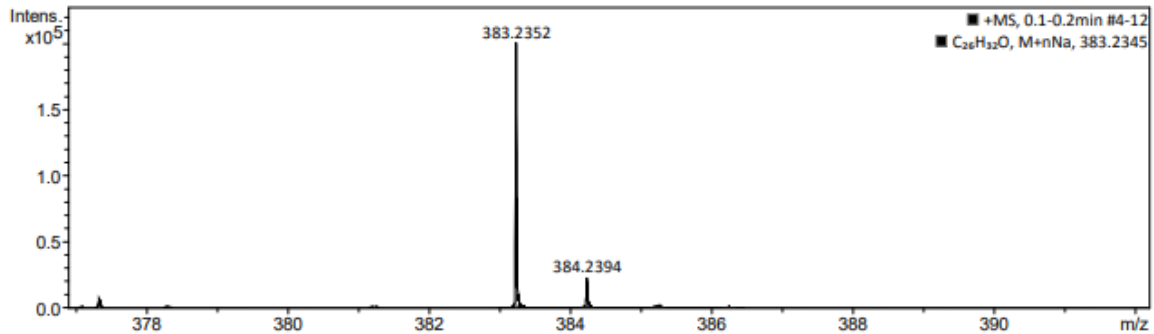

ab\_m\_03082.d

Bruker Compass DataAnalysis 4.1

printed: 5/12/2022 12:05:14 PM

by: IISER Kolkata

Page 1 of 1

HRMS data for (+)-18

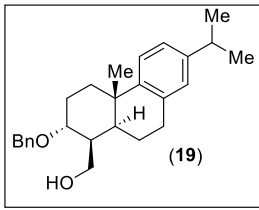

Sovan Nmr-440.fid  
GROUP AB  
AB-SOV-01304P 1H in CDCl3

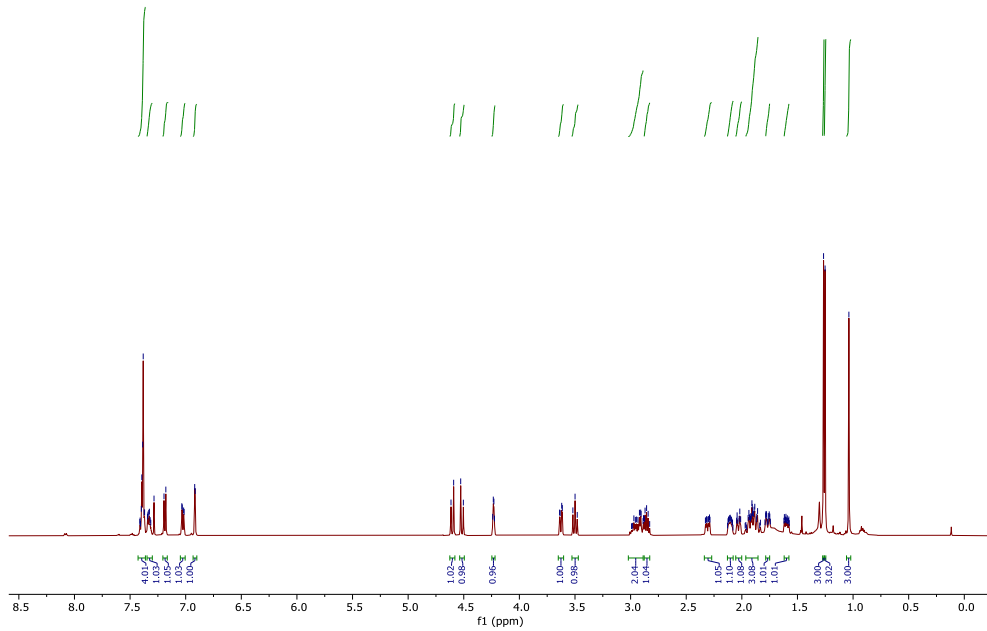

<sup>1</sup>H NMR (400 MHz, CDCl<sub>3</sub>) of (+)-**19**

Sovan Nmr-440.fid  
GROUP AB  
AB-SOV-01304P 13C in CDCl3

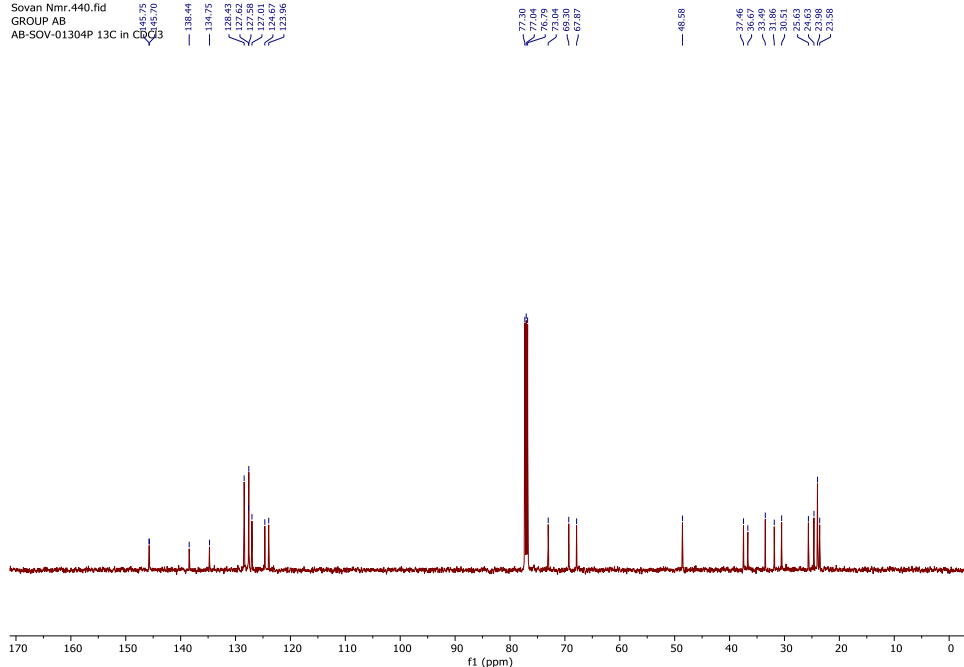

<sup>13</sup>C{<sup>1</sup>H} NMR (125 MHz, CDCl<sub>3</sub>) of (+)-**19**

# Display Report

## Analysis Info

Analysis Name D:\Data\User data\2022\MAY\lab\_sov\_304p.d  
Method Tune\_pos\_Standard.m  
Sample Name ab\_sov\_304p  
Comment

Acquisition Date 5/23/2022 1:18:48 PM  
Operator IISER Kolkata  
Instrument maXis impact 8282001.00127

## Acquisition Parameter

|             |          |                      |          |                  |           |
|-------------|----------|----------------------|----------|------------------|-----------|
| Source Type | ESI      | Ion Polarity         | Positive | Set Nebulizer    | 0.5 Bar   |
| Focus       | Active   | Set Capillary        | 3400 V   | Set Dry Heater   | 200 °C    |
| Scan Begin  | 50 m/z   | Set End Plate Offset | -500 V   | Set Dry Gas      | 4.0 l/min |
| Scan End    | 1000 m/z | Set Charging Voltage | 2000 V   | Set Divert Valve | Source    |
|             |          | Set Corona           | 0 nA     | Set APCI Heater  | 0 °C      |

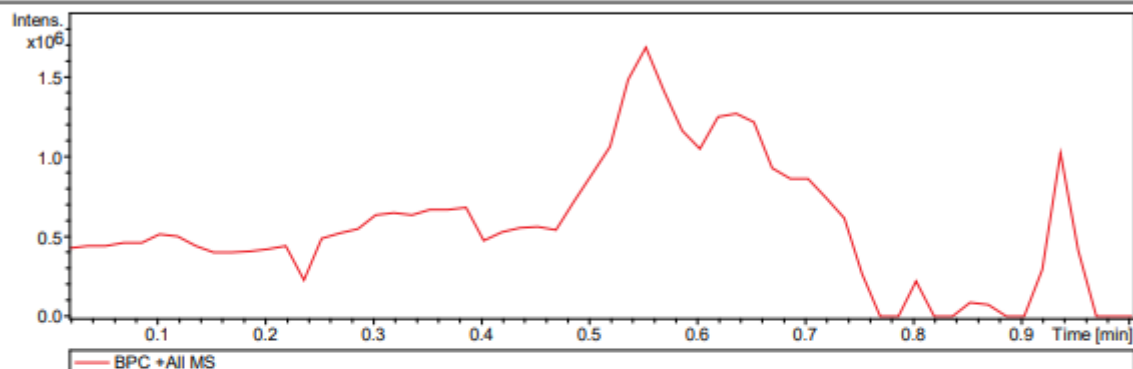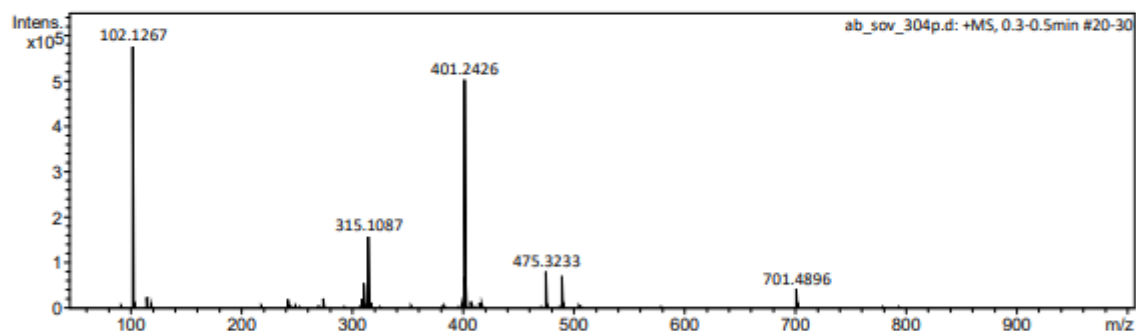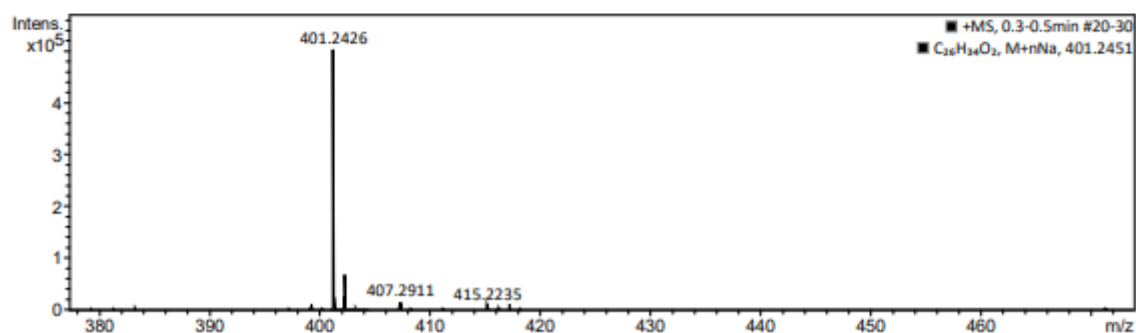

ab\_sov\_304p.d

Bruker Compass DataAnalysis 4.1

printed: 5/23/2022 1:20:55 PM

by: IISER Kolkata

Page 1 of 1

HRMS data for (+)-19



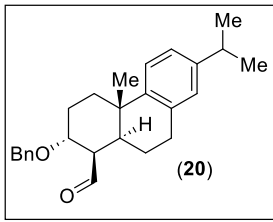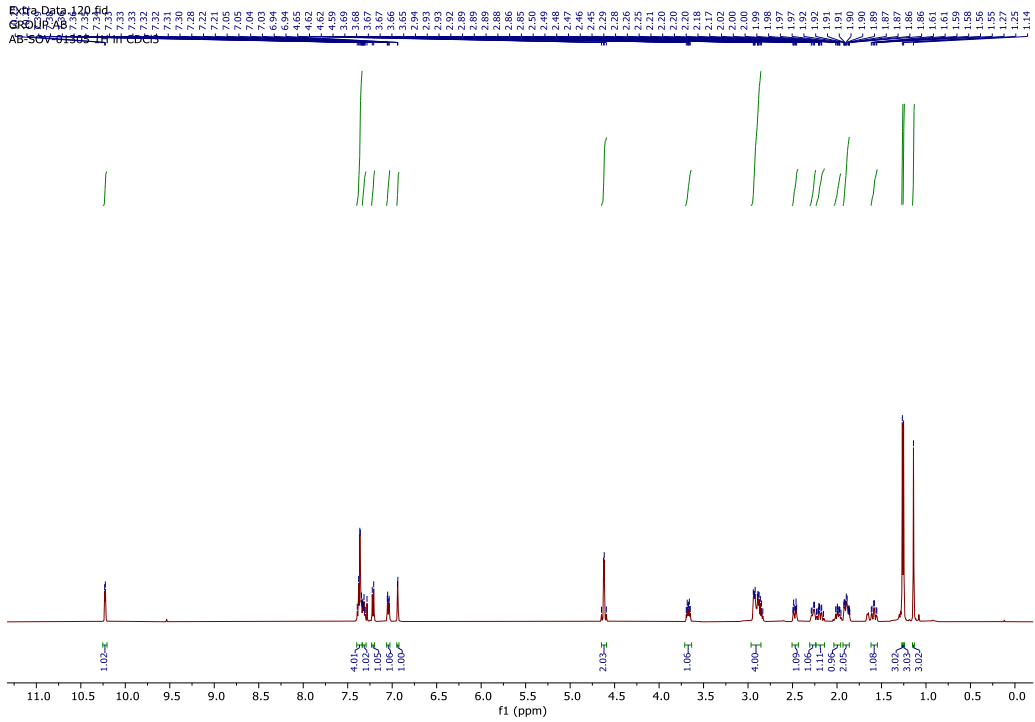

Extra Data: 100.fid  
 GROUP AB  
 AB-SOV-01305 in CDCl<sub>3</sub>

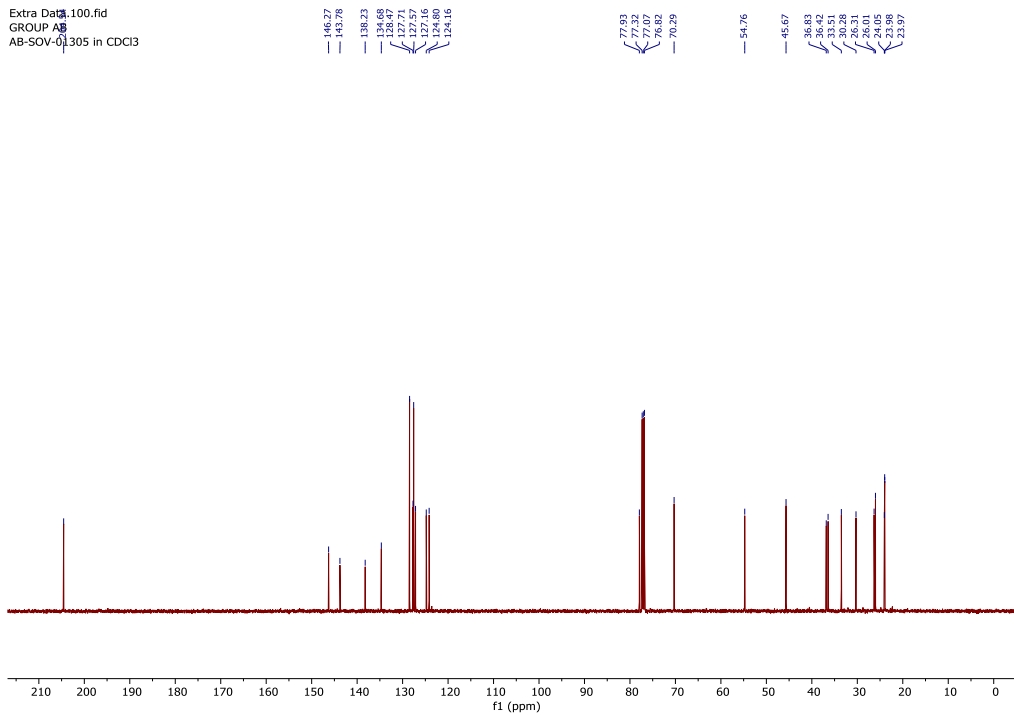

# Display Report

## Analysis Info

Analysis Name D:\Data\User data\2022\MAY\lab\_sov\_01305.d  
Method Tune\_pos\_Standard.m  
Sample Name ab\_sov\_01305  
Comment

Acquisition Date 5/24/2022 12:50:45 PM  
Operator IISER Kolkata  
Instrument maXis impact 8282001.00127

## Acquisition Parameter

|             |          |                      |          |                  |           |
|-------------|----------|----------------------|----------|------------------|-----------|
| Source Type | ESI      | Ion Polarity         | Positive | Set Nebulzer     | 0.5 Bar   |
| Focus       | Active   | Set Capillary        | 3400 V   | Set Dry Heater   | 200 °C    |
| Scan Begin  | 50 m/z   | Set End Plate Offset | -500 V   | Set Dry Gas      | 4.0 l/min |
| Scan End    | 1000 m/z | Set Charging Voltage | 2000 V   | Set Divert Valve | Source    |
|             |          | Set Corona           | 0 nA     | Set APCI Heater  | 0 °C      |

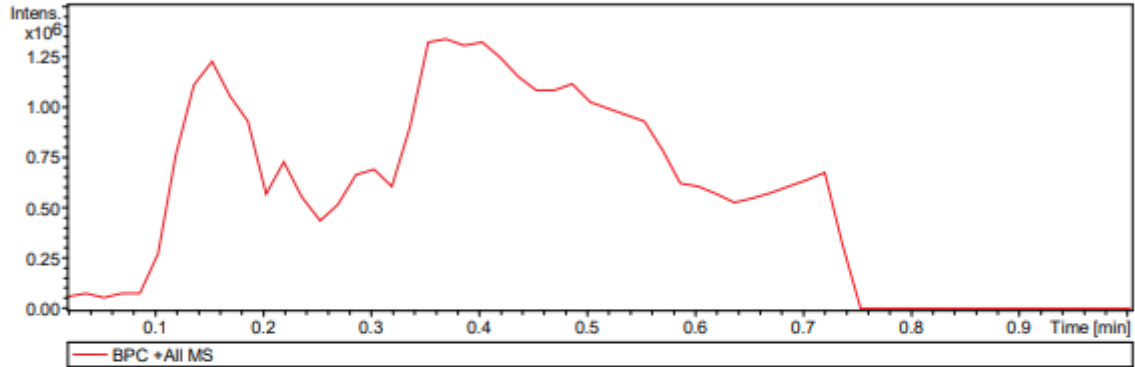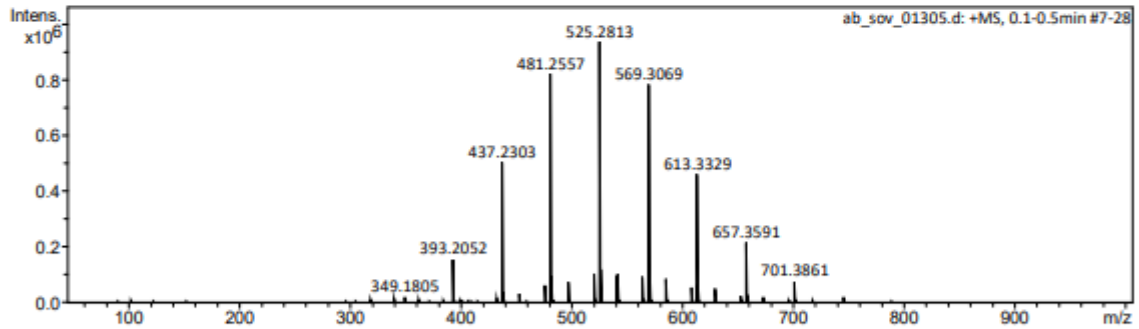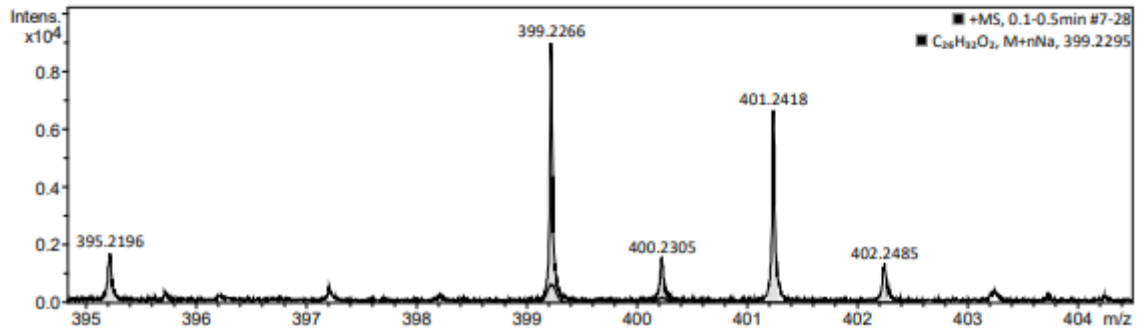

ab\_sov\_01305.d

Bruker Compass DataAnalysis 4.1

printed: 5/24/2022 1:02:18 PM

by: IISER Kolkata

Page 1 of 1

HRMS data for (+)-20

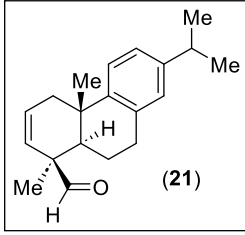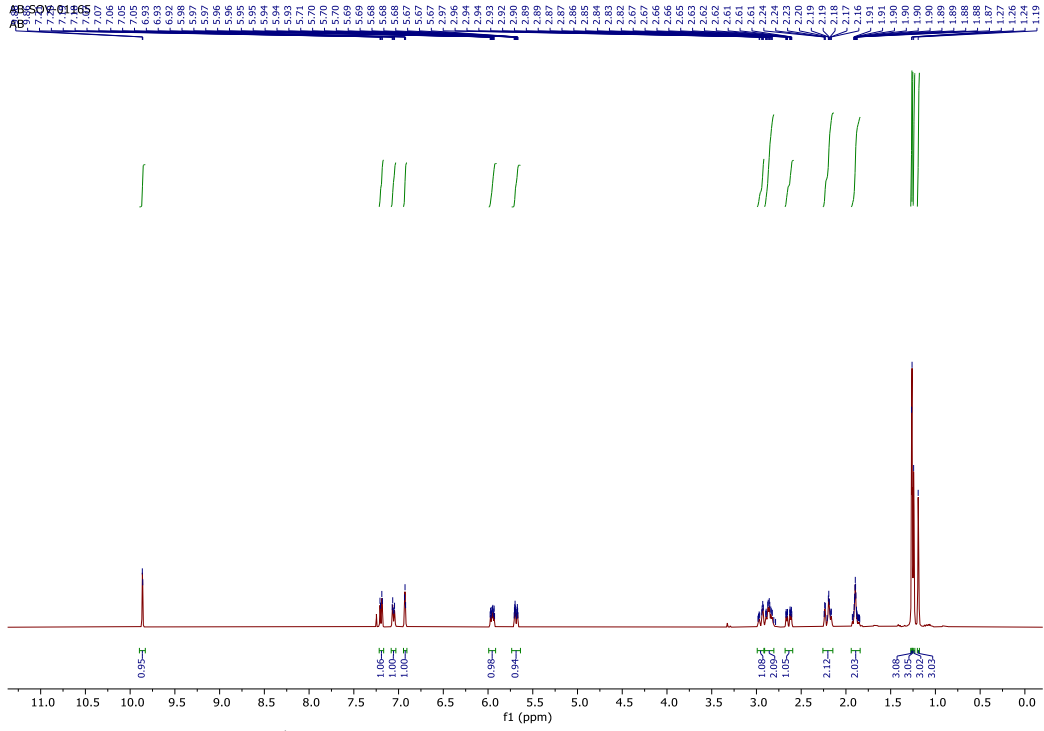

$^1\text{H}$  NMR (400 MHz,  $\text{CDCl}_3$ ) of (+)-21

AB-SOV-011659  
AB

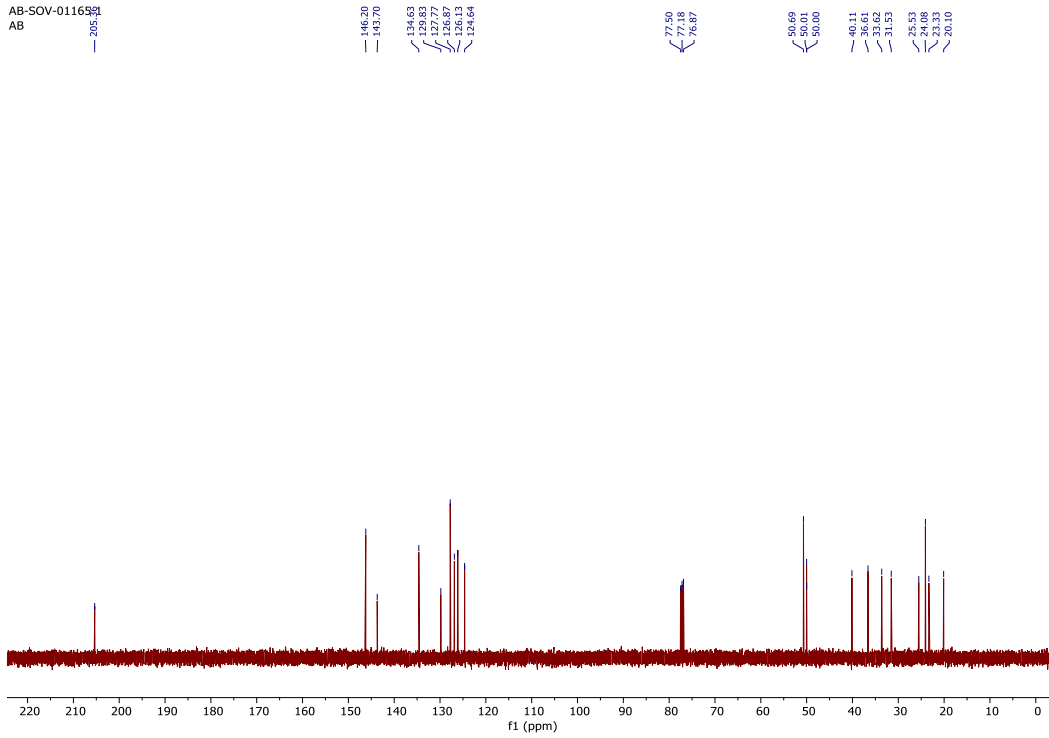

$^{13}\text{C}\{^1\text{H}\}$  NMR (125 MHz,  $\text{CDCl}_3$ ) of (+)-21

AB29-Apr-2024 11:52:50

IISER - KOLKATA

1: TOF MS ES+  
8.02e12

AB-SOV-01165 (0.087) Is (1.00,1.00) C<sub>20</sub>H<sub>27</sub>O

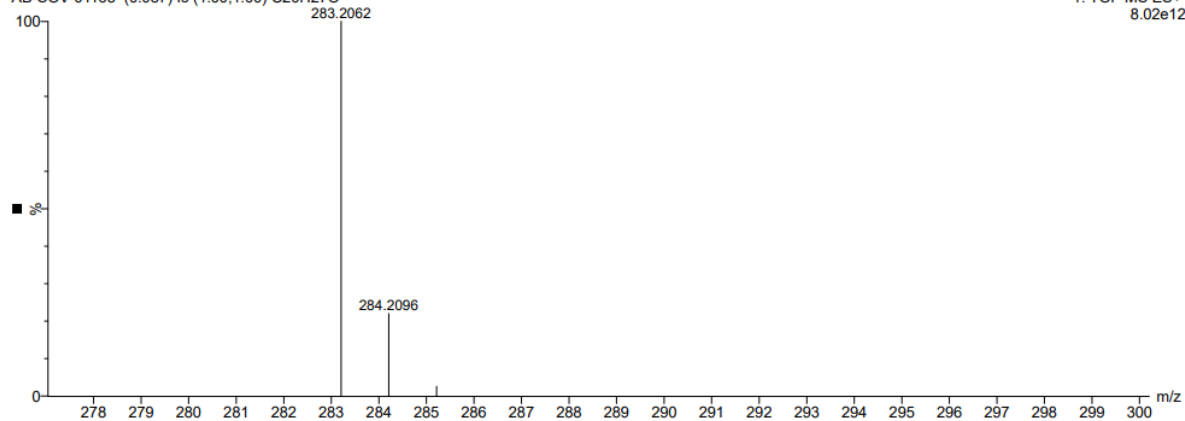

AB-SOV-01165 3 (0.087)

1: TOF MS ES+  
2.83e6

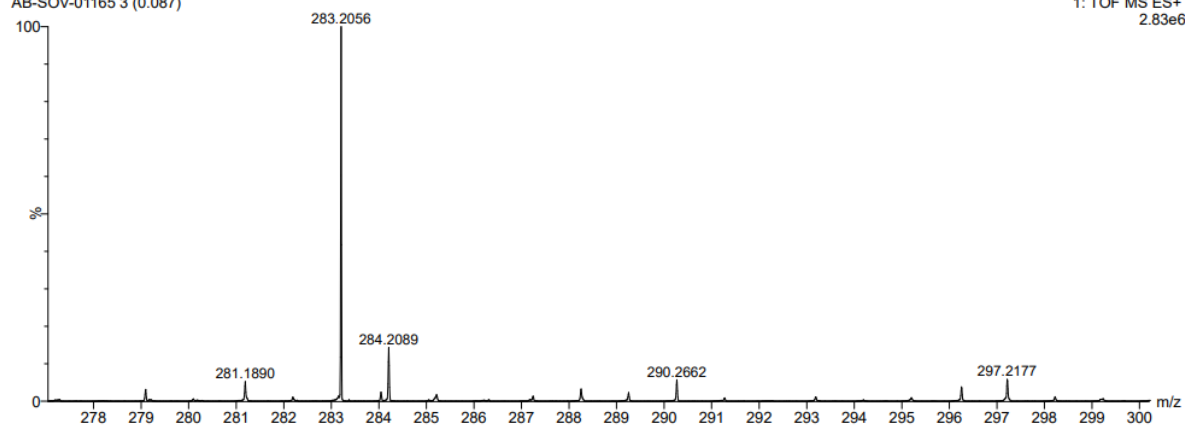

HRMS data for (+)-**21**

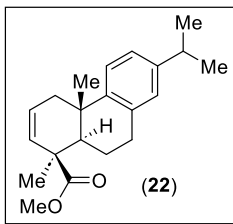

Extra Data: 161.fid  
 GROUP AB  
 AB-SOV-01167R in CDCl<sub>3</sub>

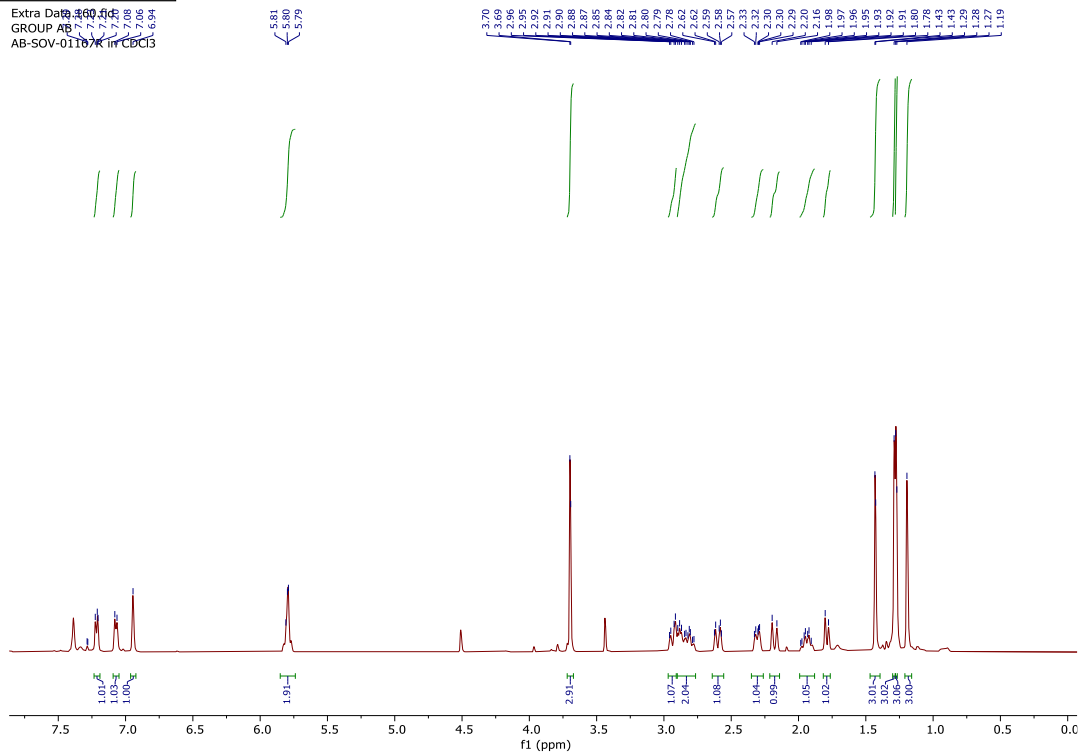

<sup>1</sup>H NMR (400 MHz, CDCl<sub>3</sub>) of (+)-22

Extra Data: 161.fid  
 GROUP AB  
 AB-SOV-01167R in CDCl<sub>3</sub>

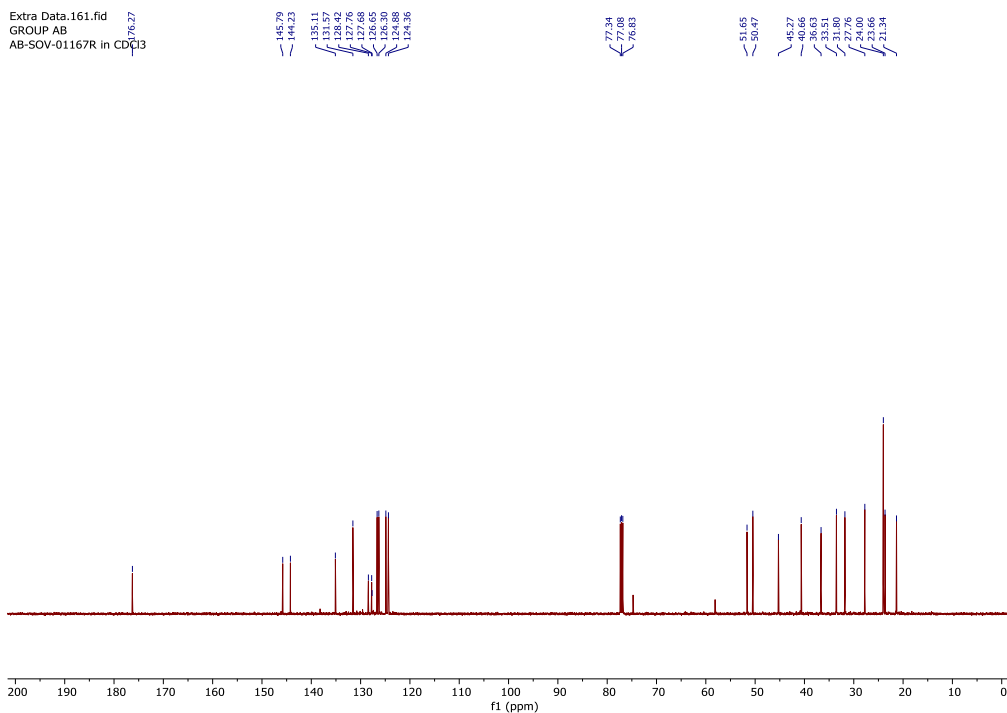

<sup>13</sup>C{<sup>1</sup>H} NMR (125 MHz, CDCl<sub>3</sub>) of (+)-22

AB29-Apr-2024 11:54:47  
AB-SOV-01167 (0.138) Is (1.00,1.00) C<sub>21</sub>H<sub>29</sub>O<sub>2</sub>

IISER - KOLKATA

1: TOF MS ES+  
7.91e12

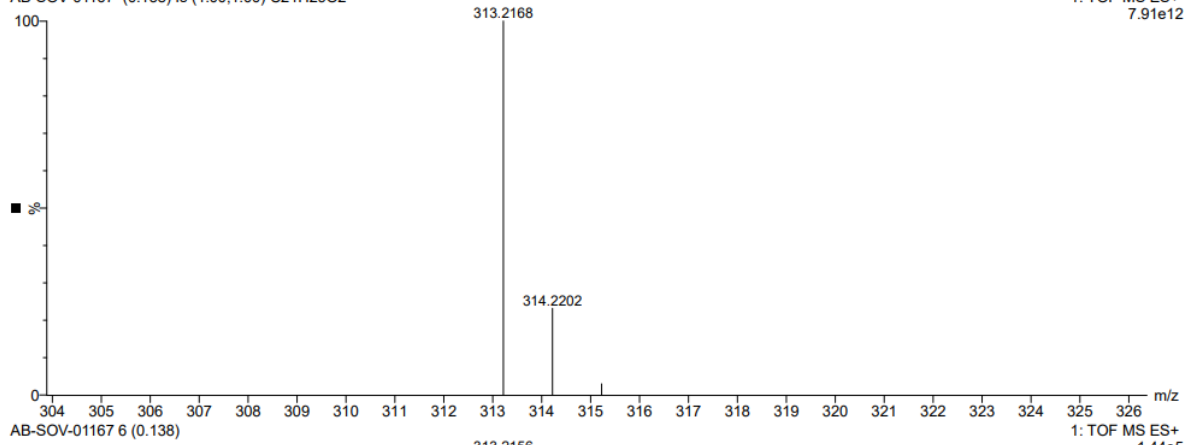

AB-SOV-01167 6 (0.138)

1: TOF MS ES+  
1.44e5

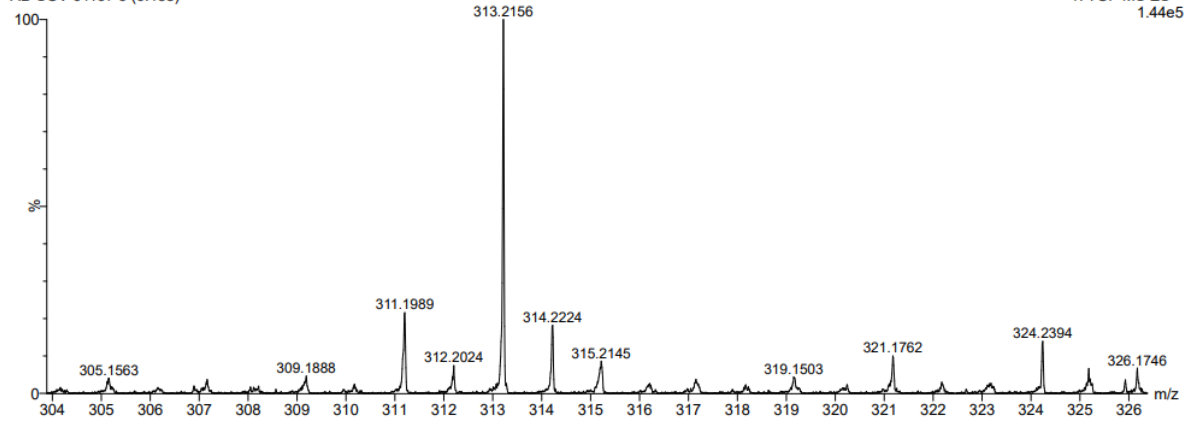

HRMS data for (+)-**22**

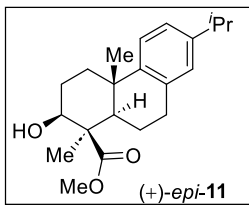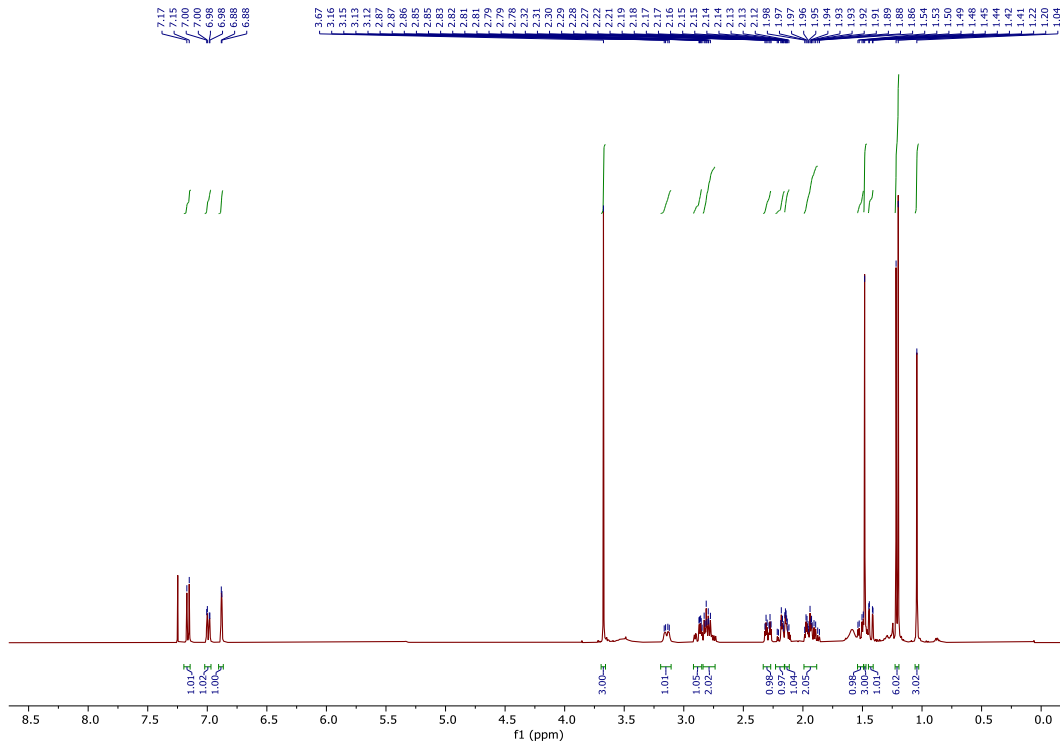

$^1\text{H}$  NMR (400 MHz,  $\text{CDCl}_3$ ) of (+)-epi-11

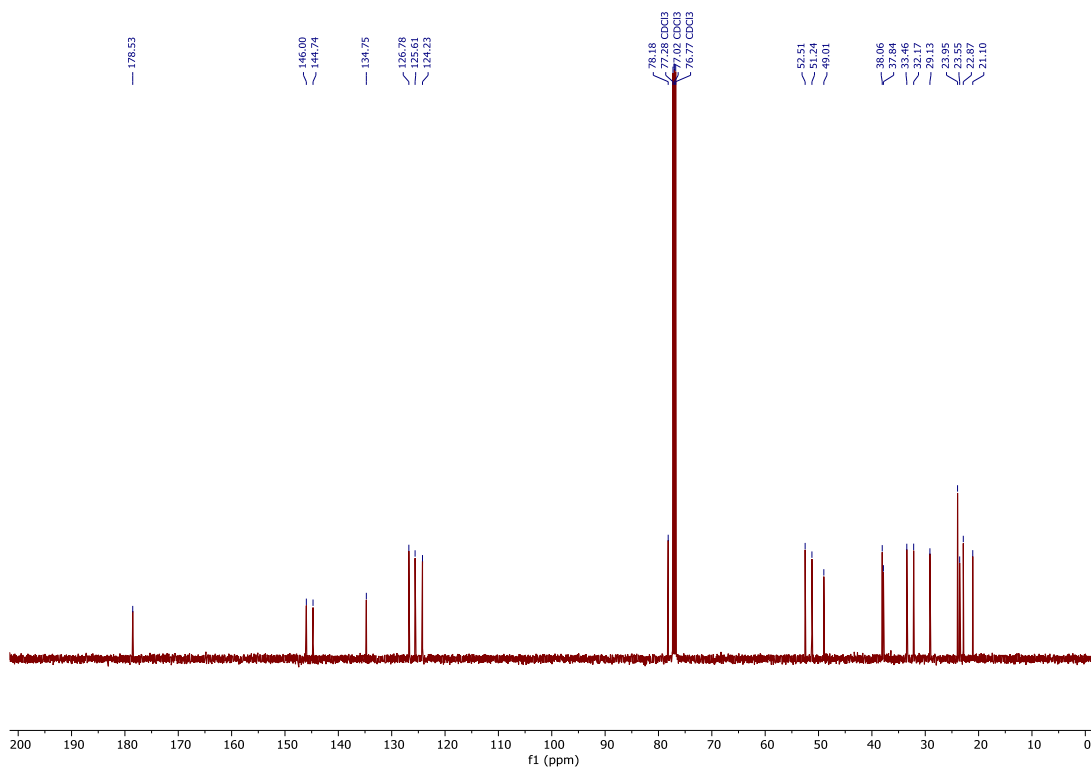

$^{13}\text{C}\{^1\text{H}\}$  NMR (125 MHz,  $\text{CDCl}_3$ ) of (+)-epi-11

# Display Report

## Analysis Info

Analysis Name D:\Data\new user data 2021\july-2021\19-july\Dr. A. Bisai-ABKS04174P1.d Acquisition Date 7/19/2021 4:32:35 PM  
Method tune mix\_low.New.021117.m Operator RUCHI  
Sample Name ABKS04174P1 Instrument micrOTOF-Q II 10330  
Comment

## Acquisition Parameter

|             |            |                       |           |                  |           |
|-------------|------------|-----------------------|-----------|------------------|-----------|
| Source Type | ESI        | Ion Polarity          | Positive  | Set Nebulizer    | 0.4 Bar   |
| Focus       | Not active | Set Capillary         | 4600 V    | Set Dry Heater   | 180 °C    |
| Scan Begin  | 50 m/z     | Set End Plate Offset  | -500 V    | Set Dry Gas      | 4.0 l/min |
| Scan End    | 3000 m/z   | Set Collision Cell RF | 100.0 Vpp | Set Divert Valve | Waste     |

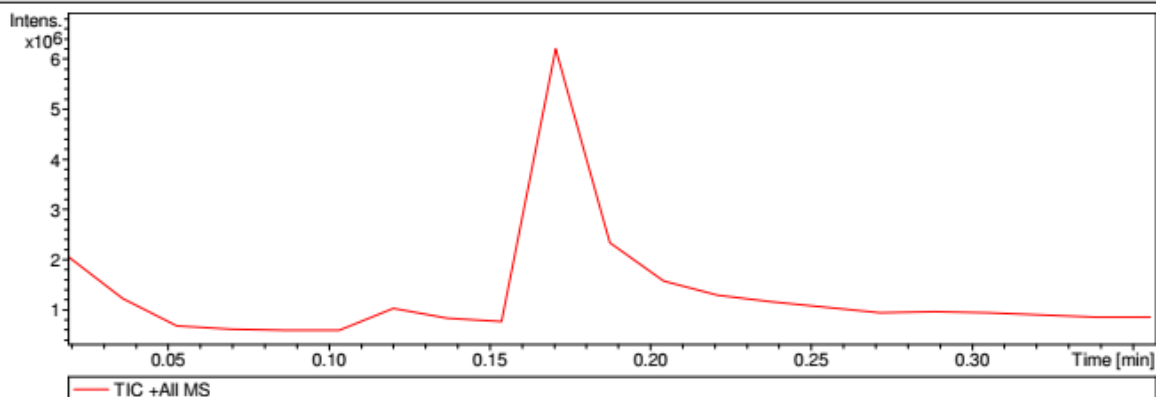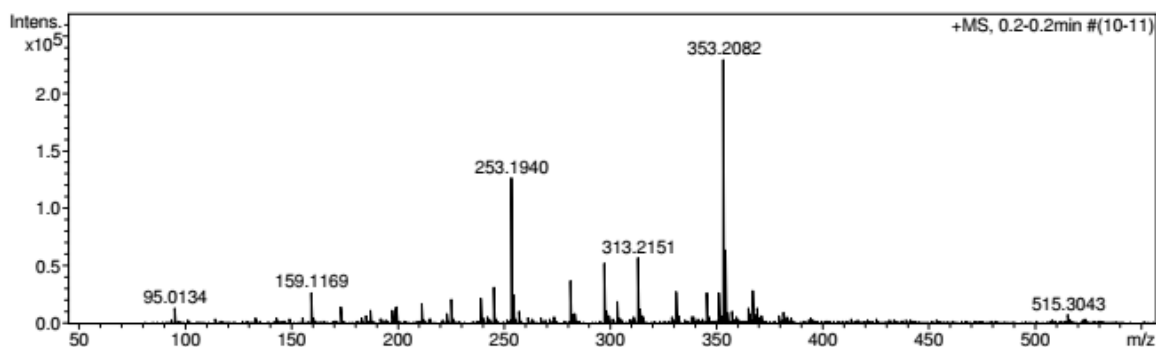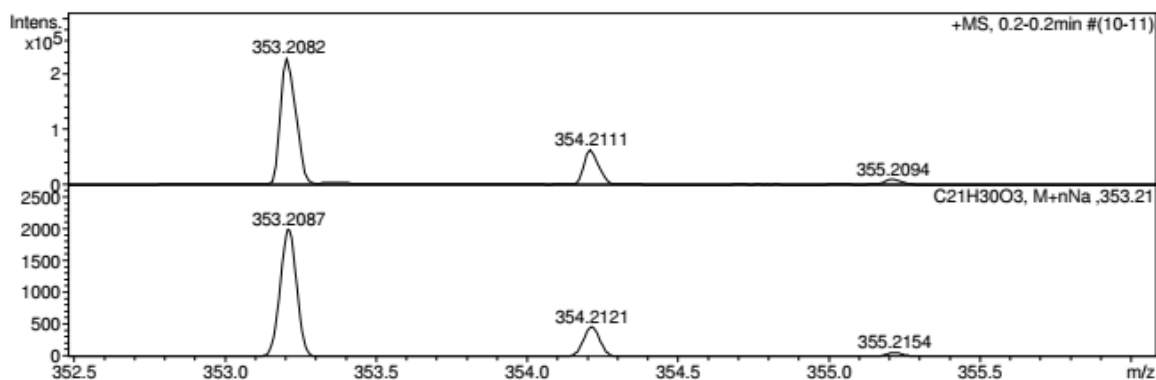

HRMS data for (+)-*epi*-11



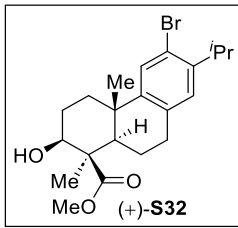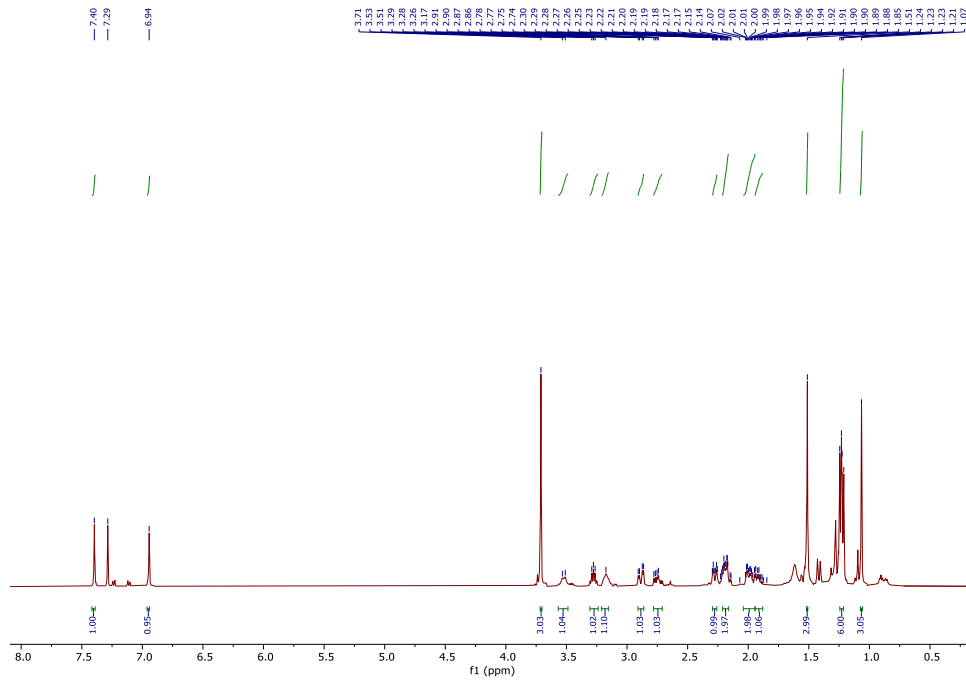

$^1\text{H}$  NMR (500 MHz,  $\text{CDCl}_3$ ) of (+)-S32

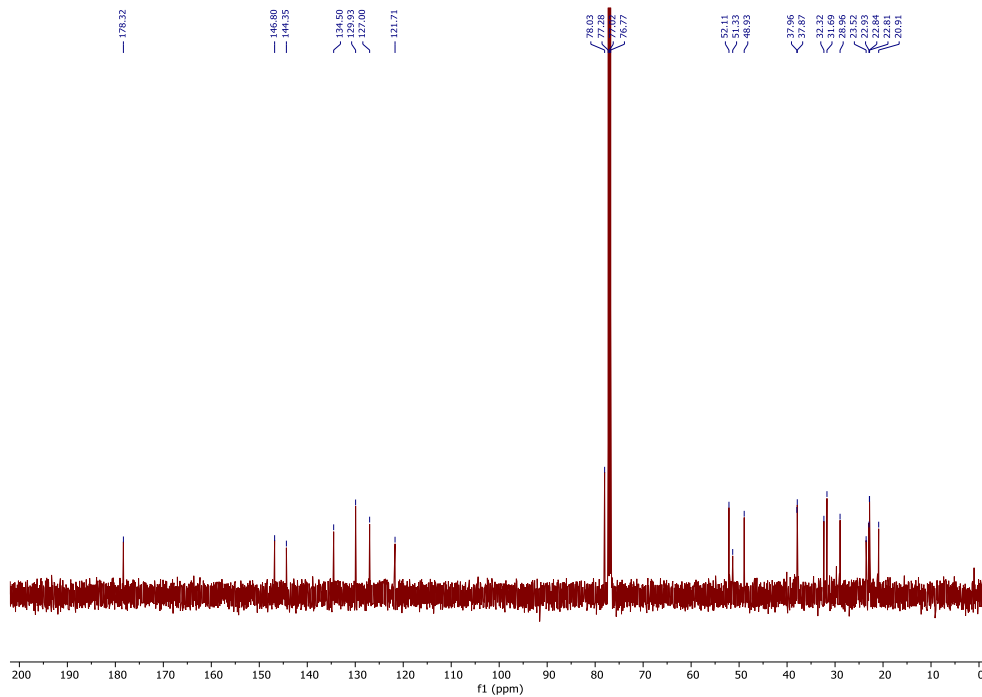

$^{13}\text{C}\{^1\text{H}\}$  NMR (125 MHz,  $\text{CDCl}_3$ ) of (+)-S32

# Display Report

## Analysis Info

Analysis Name D:\Data\User data\2022\JAN\lab\_sk\_218.d  
Method Tune\_pos\_Standard.m  
Sample Name ab\_sk\_218  
Comment

Acquisition Date 1/24/2022 11:20:03 AM

Operator IISER Kolkata  
Instrument maXis impact 8282001.00127

## Acquisition Parameter

|             |          |                      |          |                  |           |
|-------------|----------|----------------------|----------|------------------|-----------|
| Source Type | ESI      | Ion Polarity         | Positive | Set Nebulizer    | 0.5 Bar   |
| Focus       | Active   | Set Capillary        | 3400 V   | Set Dry Heater   | 200 °C    |
| Scan Begin  | 50 m/z   | Set End Plate Offset | -500 V   | Set Dry Gas      | 4.0 l/min |
| Scan End    | 1000 m/z | Set Charging Voltage | 2000 V   | Set Divert Valve | Source    |
|             |          | Set Corona           | 0 nA     | Set APCI Heater  | 0 °C      |

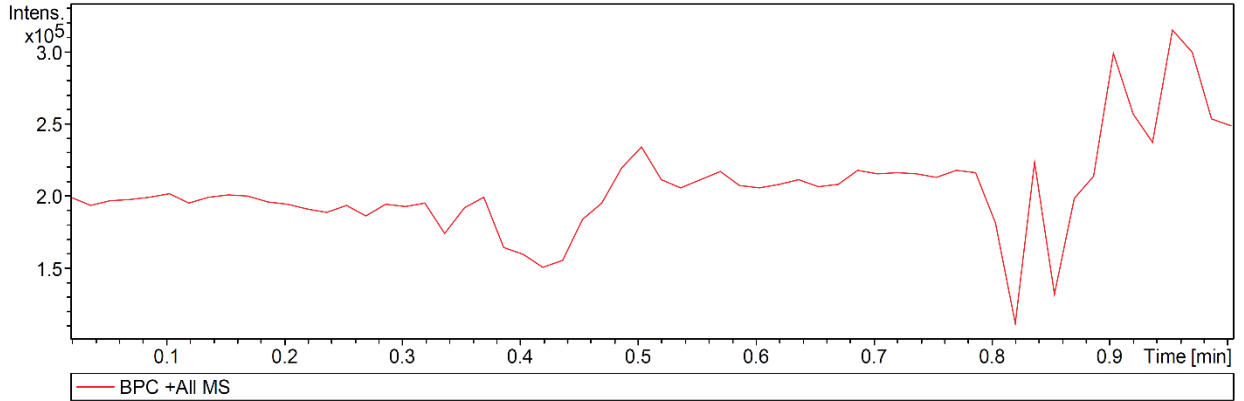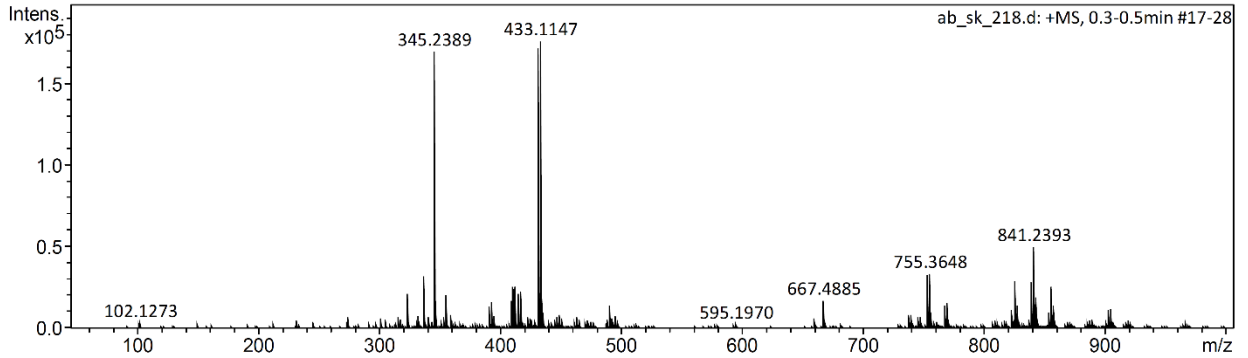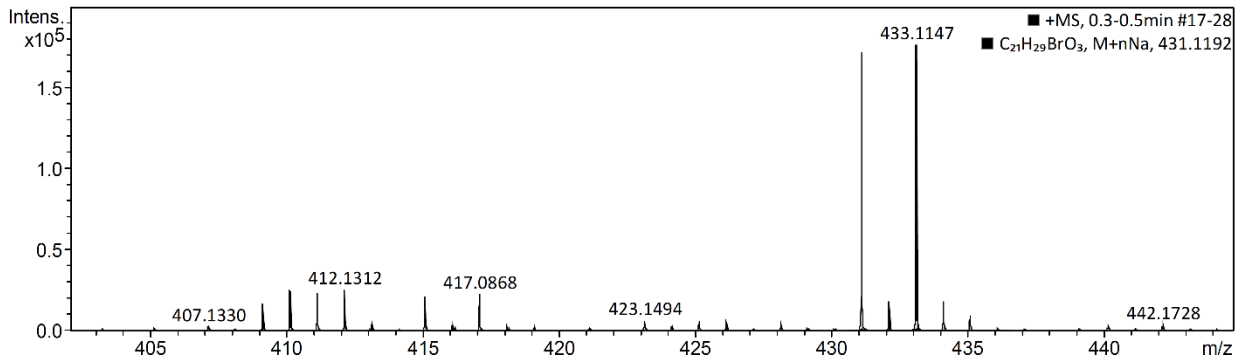

ab\_sk\_218.d

Bruker Compass DataAnalysis 4.1

printed: 1/24/2022 11:23:39 AM

by: IISER Kolkata

Page 1 of 1

HRMS data of (+)-S32

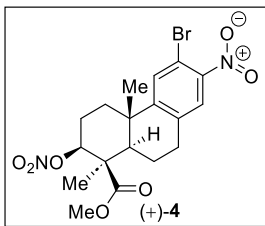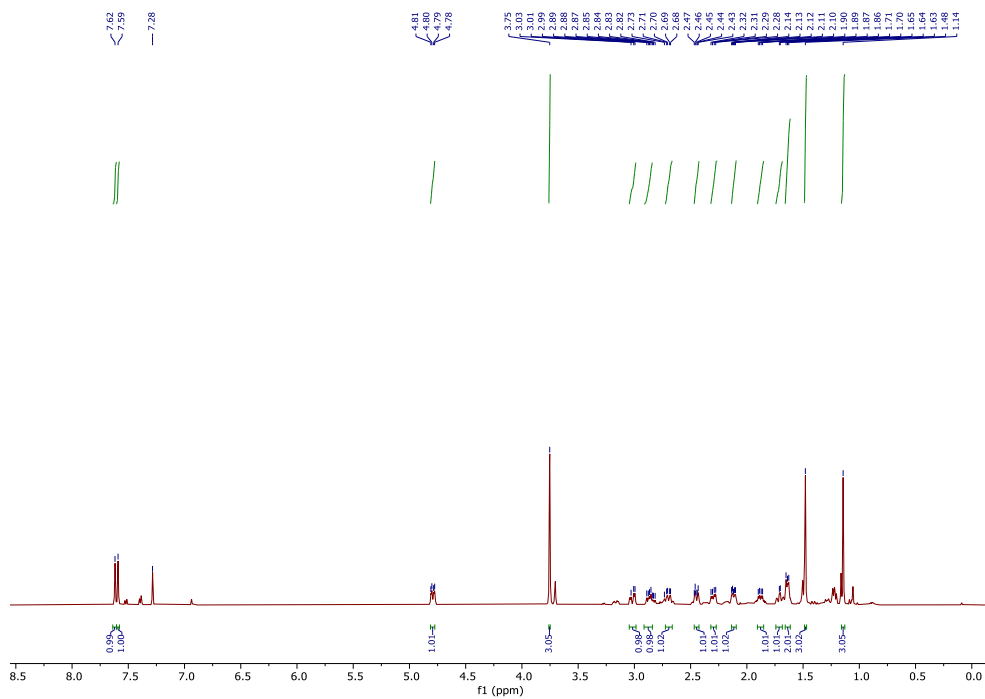

<sup>1</sup>H NMR (500 MHz, CDCl<sub>3</sub>) of (+)-4

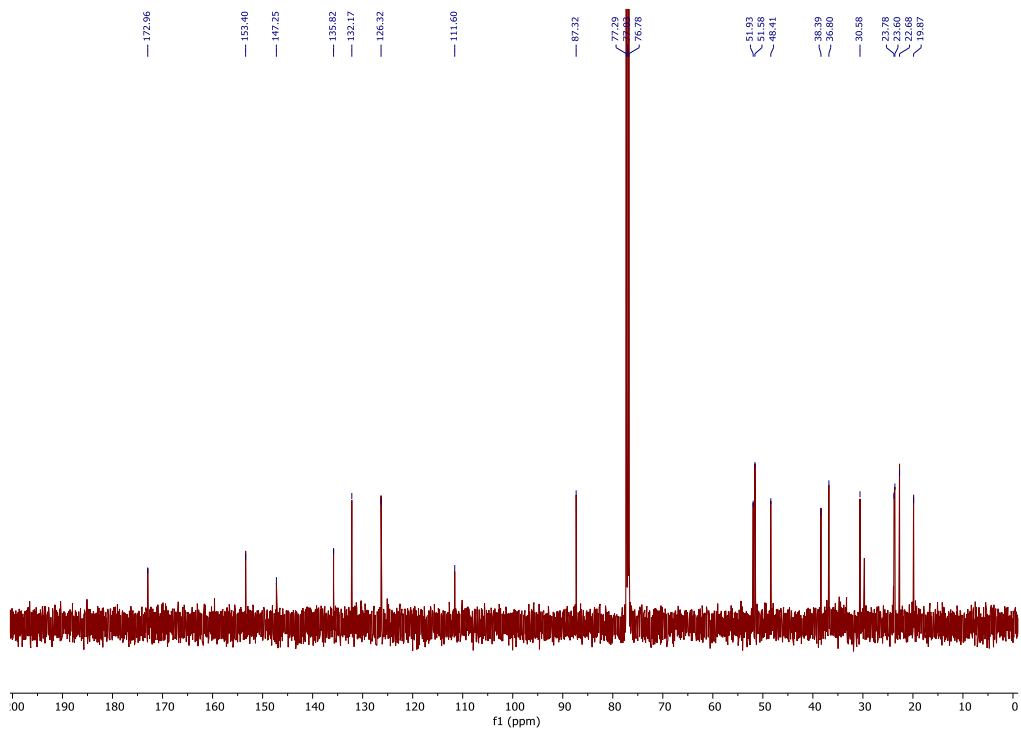

<sup>13</sup>C{<sup>1</sup>H} NMR (125 MHz, CDCl<sub>3</sub>) of (+)-4

# Display Report

## Analysis Info

Analysis Name D:\Data\User data\2022\FEB\lab\_sk\_221.d  
Method Tune\_pos\_Standard.m  
Sample Name ab\_sk\_221  
Comment

Acquisition Date 2/14/2022 11:43:29 AM

Operator IISER Kolkata  
Instrument maXis impact 8282001.00127

## Acquisition Parameter

|             |          |                      |          |                  |           |
|-------------|----------|----------------------|----------|------------------|-----------|
| Source Type | ESI      | Ion Polarity         | Positive | Set Nebulizer    | 0.5 Bar   |
| Focus       | Active   | Set Capillary        | 3400 V   | Set Dry Heater   | 200 °C    |
| Scan Begin  | 50 m/z   | Set End Plate Offset | -500 V   | Set Dry Gas      | 4.0 l/min |
| Scan End    | 1000 m/z | Set Charging Voltage | 2000 V   | Set Divert Valve | Source    |
|             |          | Set Corona           | 0 nA     | Set APCI Heater  | 0 °C      |

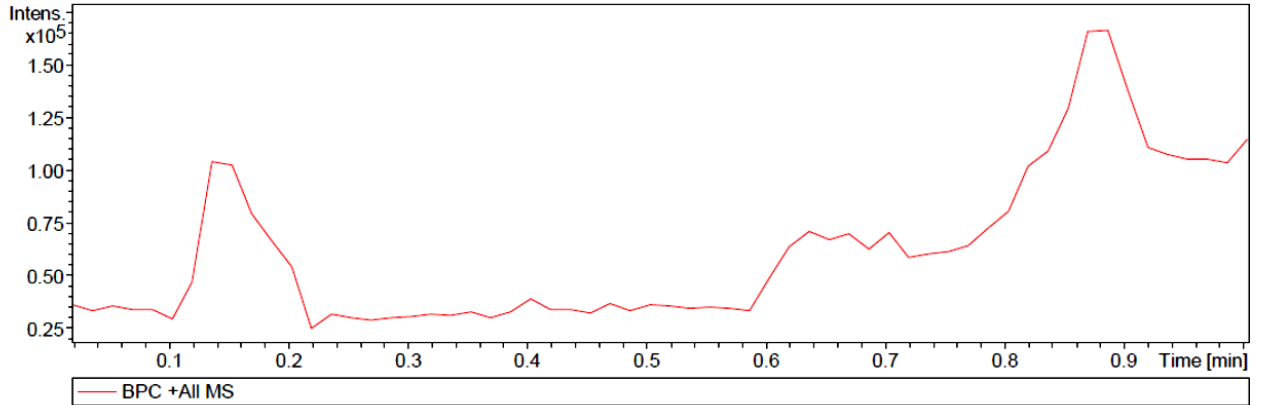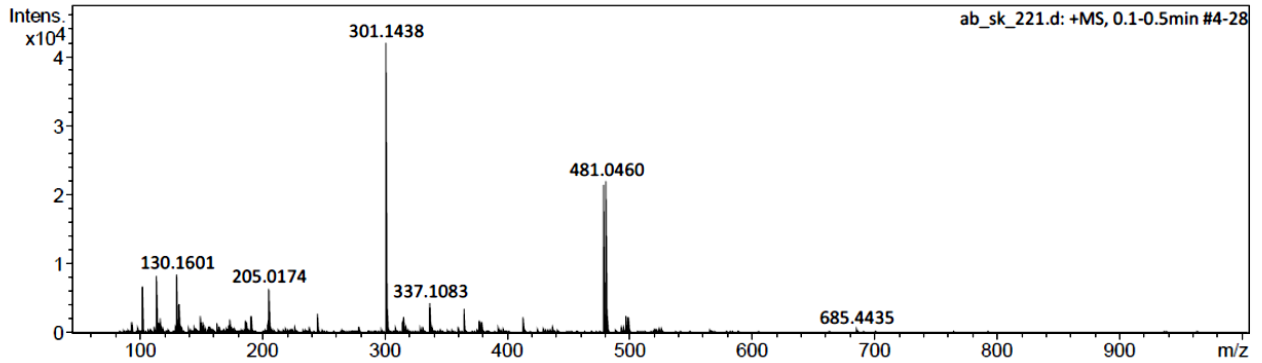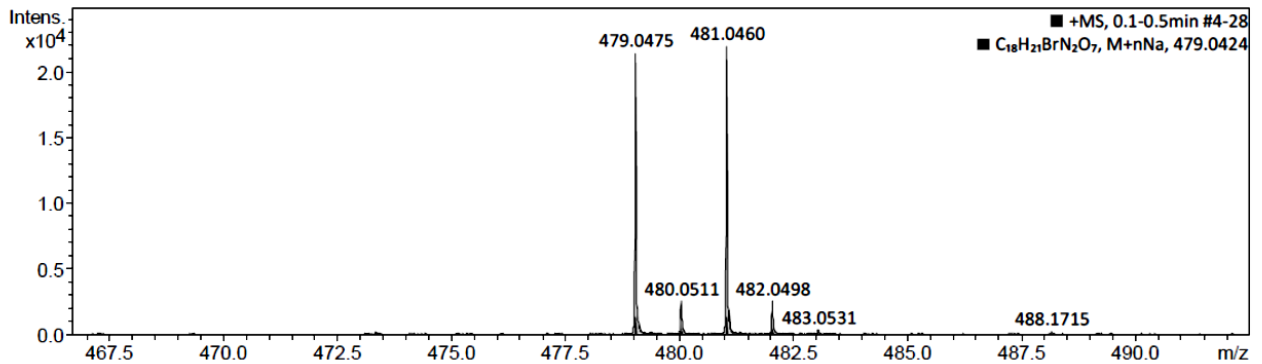

HRMS data of (+)-4

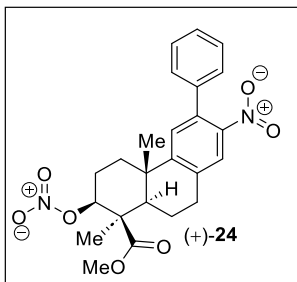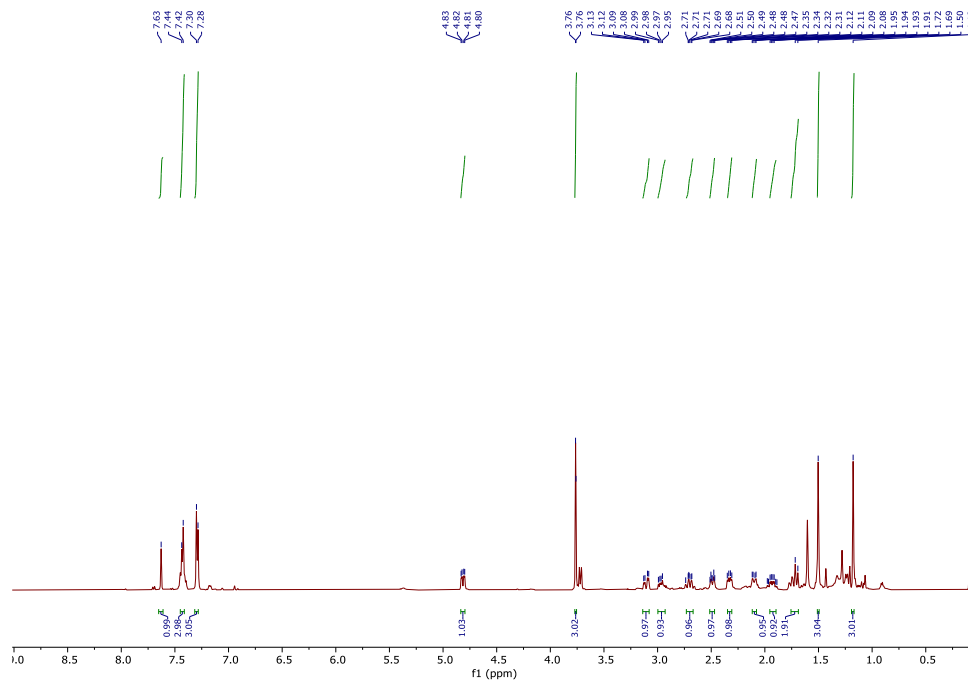

<sup>1</sup>H NMR (500 MHz, CDCl<sub>3</sub>) of (+)-24

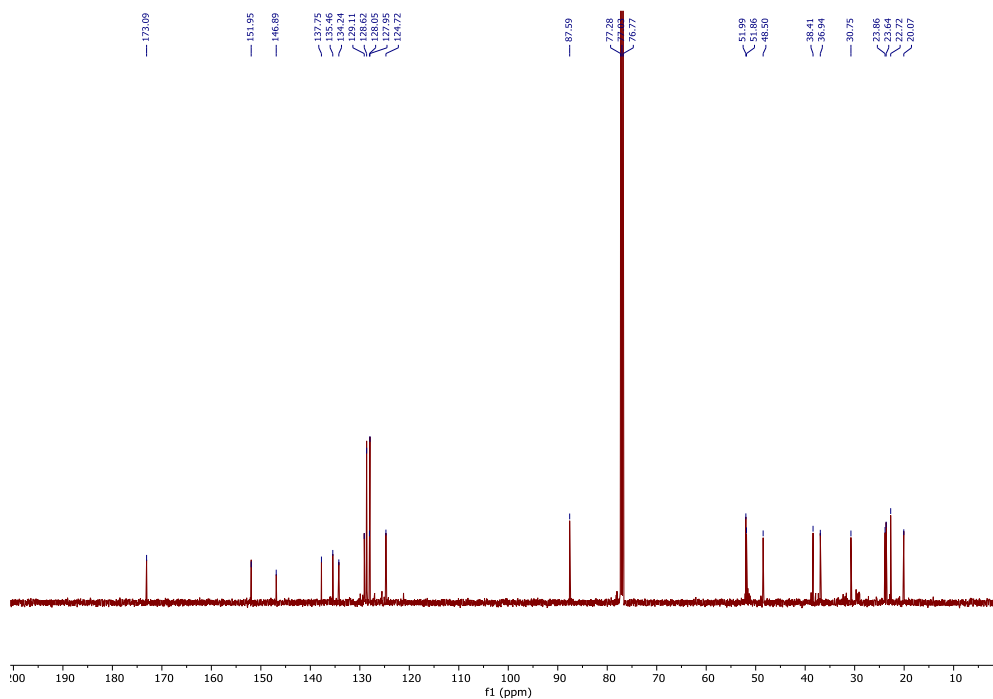

<sup>13</sup>C{<sup>1</sup>H} NMR (125 MHz, CDCl<sub>3</sub>) of (+)-24

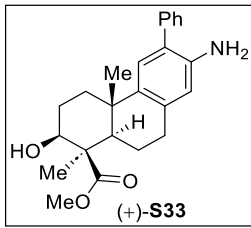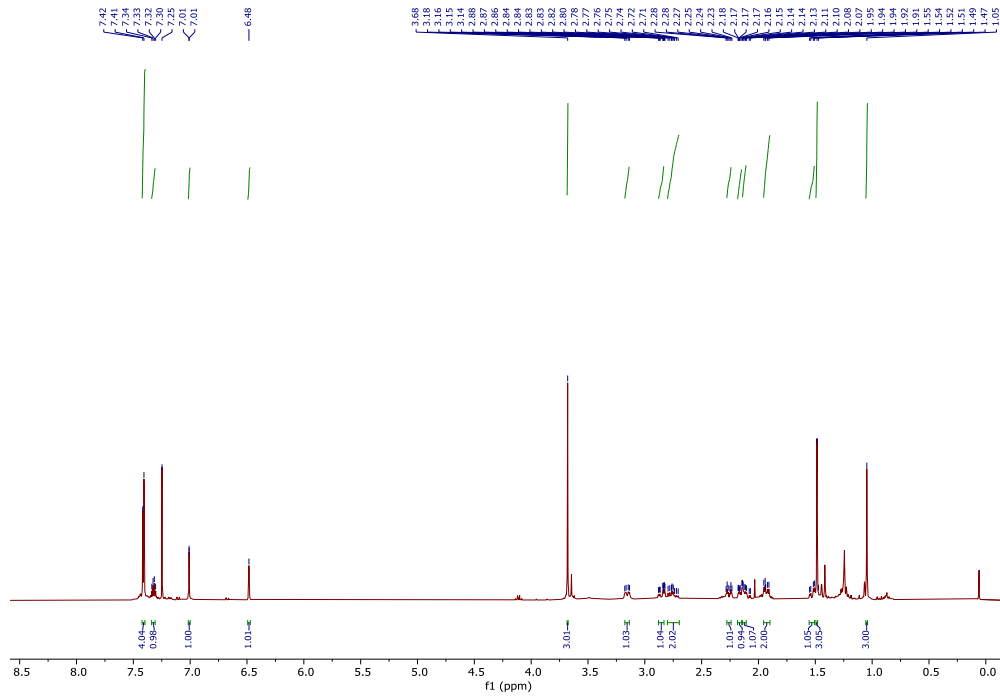

<sup>1</sup>H NMR (500 MHz, CDCl<sub>3</sub>) of (+)-S33

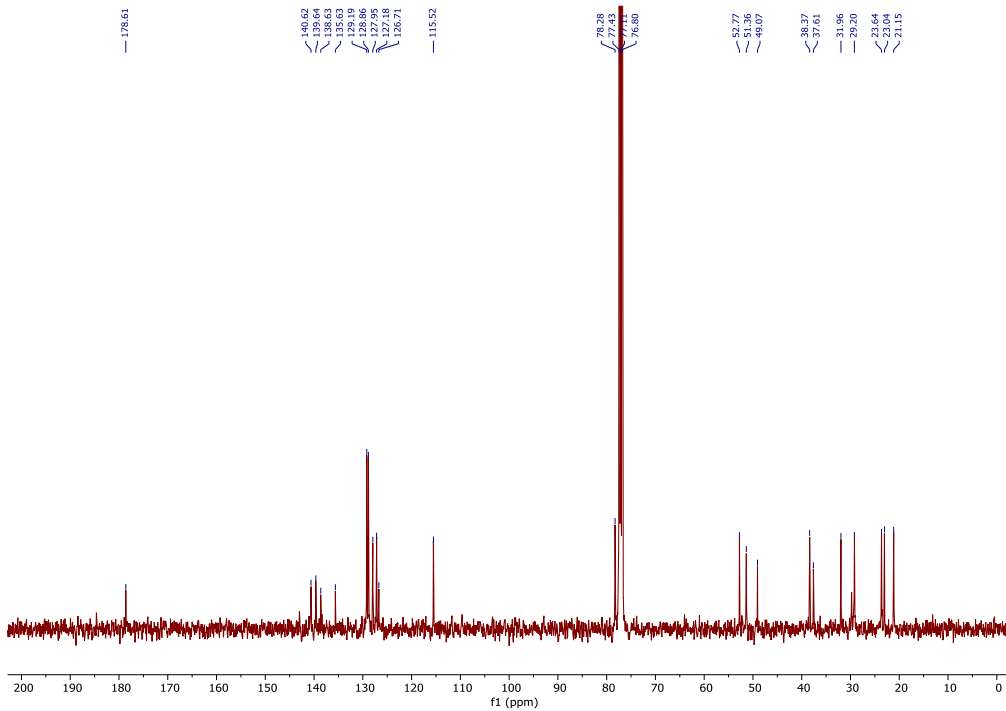

<sup>13</sup>C{<sup>1</sup>H} NMR (125 MHz, CDCl<sub>3</sub>) of (+)-S33

# Display Report

## Analysis Info

Analysis Name D:\Data\User data\2022\JAN\ab\_sov\_01281r1.d  
Method Tune\_pos\_Standard.m  
Sample Name AB\_SOV\_01281R1  
Comment

Acquisition Date 1/24/2022 11:31:54 AM

Operator IISER Kolkata  
Instrument maXis impact 8282001.00127

## Acquisition Parameter

|             |          |                      |          |                  |           |
|-------------|----------|----------------------|----------|------------------|-----------|
| Source Type | ESI      | Ion Polarity         | Positive | Set Nebulizer    | 0.5 Bar   |
| Focus       | Active   | Set Capillary        | 3400 V   | Set Dry Heater   | 200 °C    |
| Scan Begin  | 50 m/z   | Set End Plate Offset | -500 V   | Set Dry Gas      | 4.0 l/min |
| Scan End    | 1000 m/z | Set Charging Voltage | 2000 V   | Set Divert Valve | Source    |
|             |          | Set Corona           | 0 nA     | Set APCI Heater  | 0 °C      |

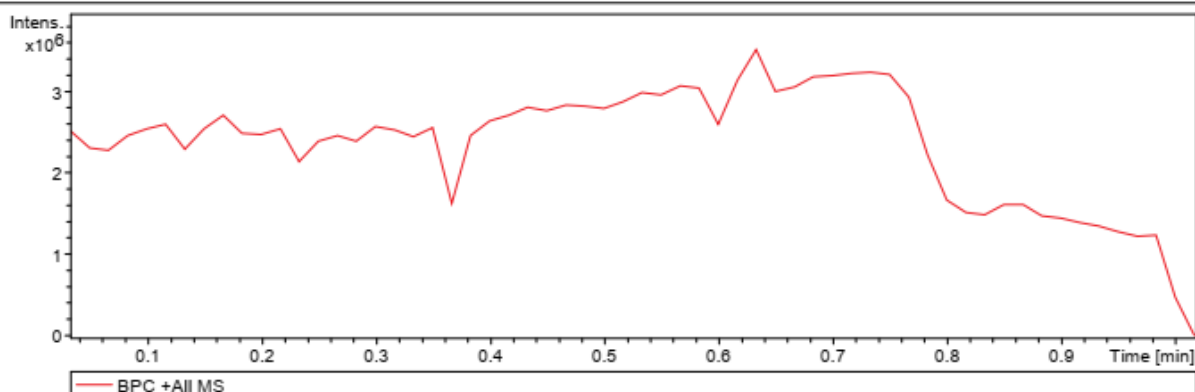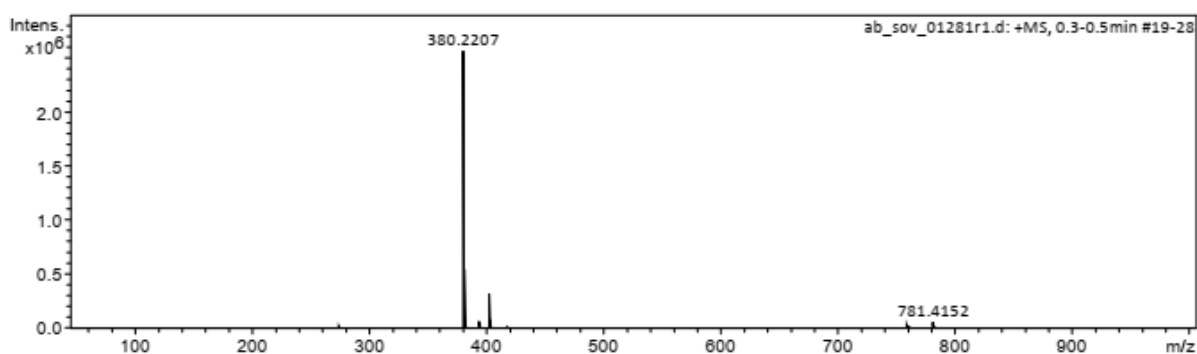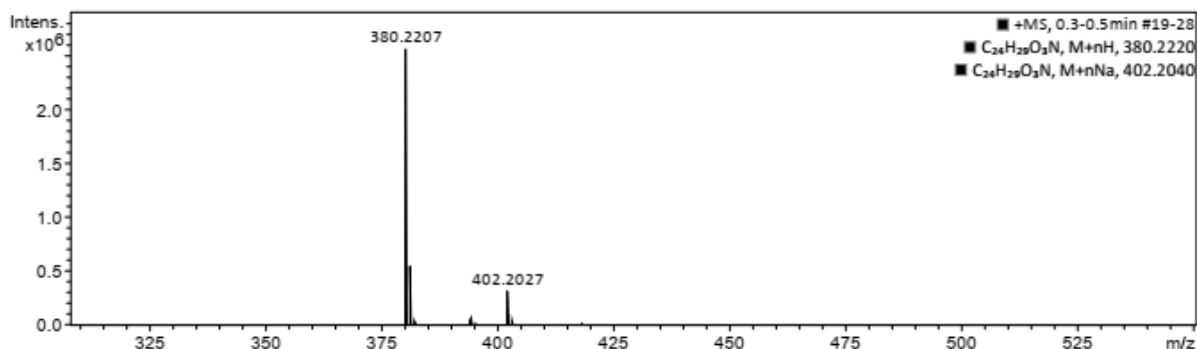

ab\_sov\_01281r1.d

Bruker Compass DataAnalysis 4.1

printed: 1/24/2022 2:38:34 PM

by: IISER Kolkata

Page 1 of 1

HRMS data of (+)-S33

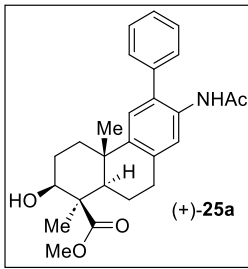

temp.850.fid  
GROUP AB  
AB-AYA-RN03072 in CDCl<sub>3</sub>

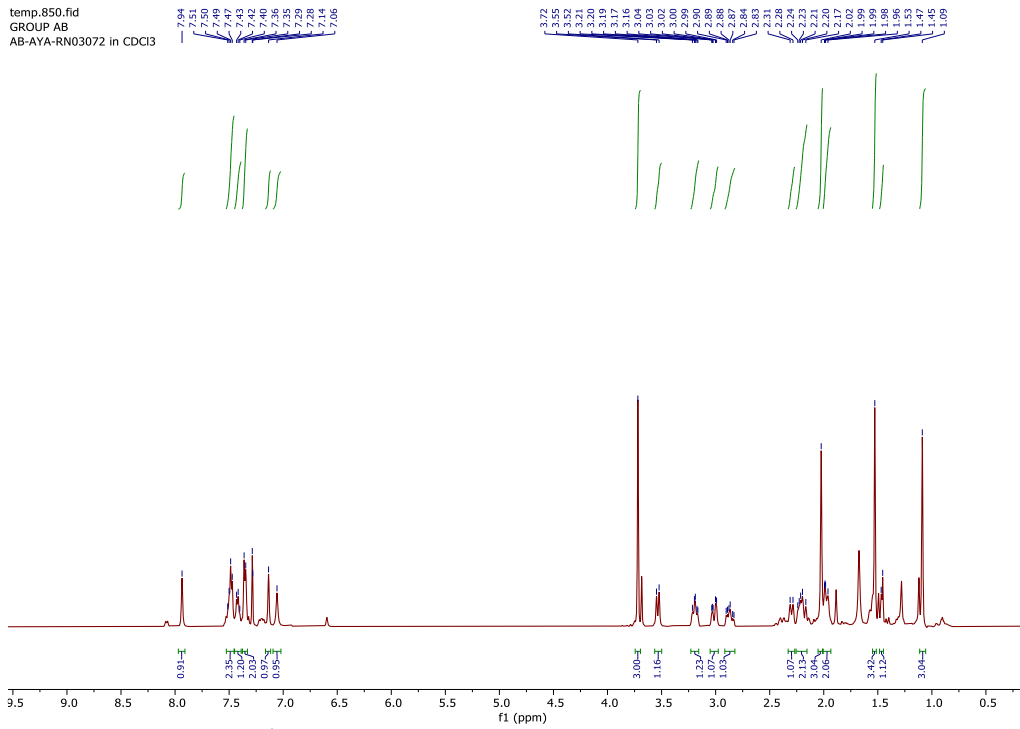

<sup>1</sup>H NMR (500 MHz, CDCl<sub>3</sub>) of (+)-25a

temp.851.fid  
GROUP AB  
AB-AYA-RN03072 in CDCl<sub>3</sub>

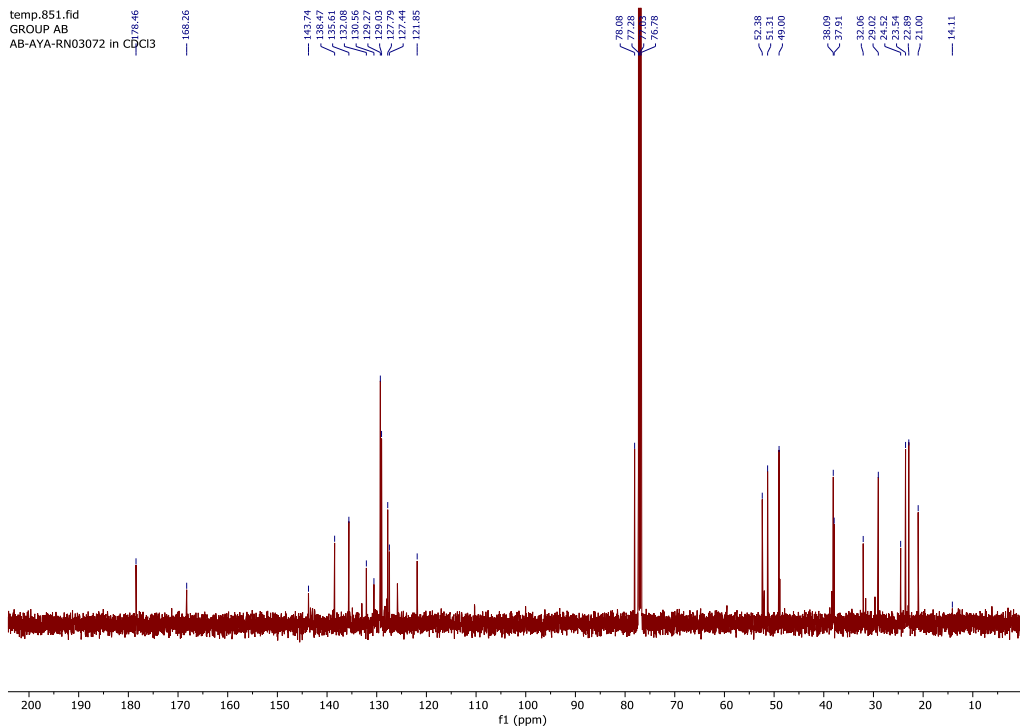

<sup>13</sup>C{<sup>1</sup>H} NMR (125 MHz, CDCl<sub>3</sub>) of (+)-25a



# Display Report

## Analysis Info

Analysis Name D:\Data\User data\2022\APRIL\ab\_rn\_03072.d  
Method Tune\_pos\_Standard.m  
Sample Name ab\_rn\_03072  
Comment

Acquisition Date 4/21/2022 1:01:41 PM

Operator IISER Kolkata  
Instrument maXis impact 8282001.00127

## Acquisition Parameter

|             |          |                      |          |                  |           |
|-------------|----------|----------------------|----------|------------------|-----------|
| Source Type | ESI      | Ion Polarity         | Positive | Set Nebulizer    | 0.5 Bar   |
| Focus       | Active   | Set Capillary        | 3400 V   | Set Dry Heater   | 200 °C    |
| Scan Begin  | 50 m/z   | Set End Plate Offset | -500 V   | Set Dry Gas      | 4.0 l/min |
| Scan End    | 1000 m/z | Set Charging Voltage | 2000 V   | Set Divert Valve | Source    |
|             |          | Set Corona           | 0 nA     | Set APCI Heater  | 0 °C      |

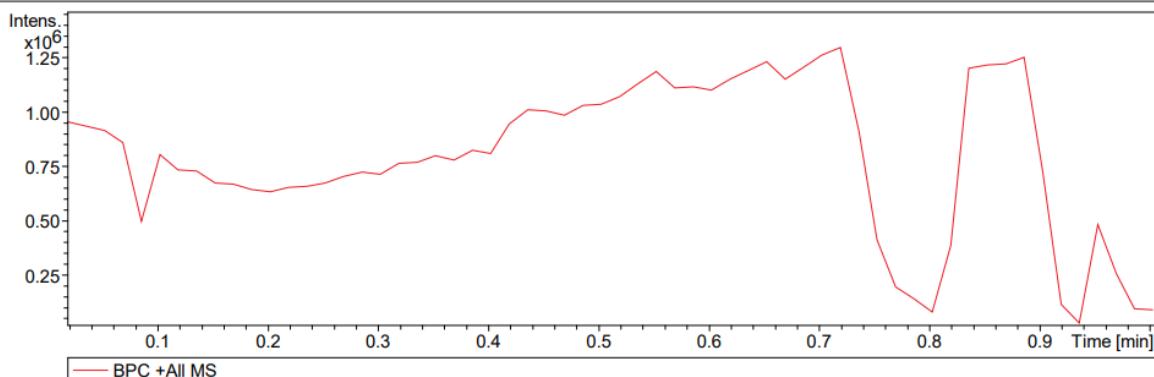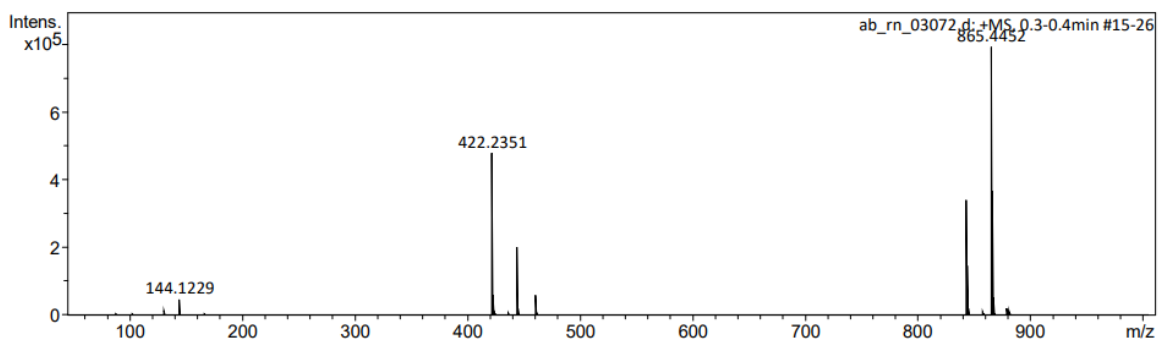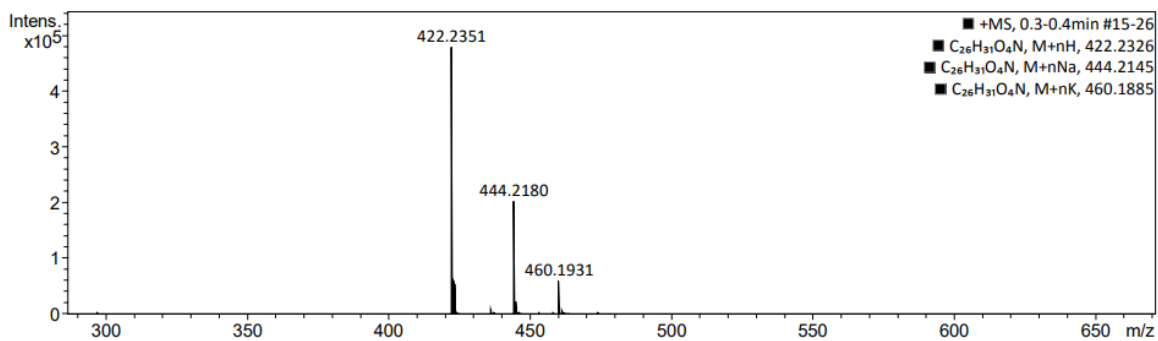

ab\_rn\_03072.d

Bruker Compass DataAnalysis 4.1

printed: 4/21/2022 1:03:53 PM

by: IISER Kolkata

Page 1 of 1

HRMS data of (+)-25a

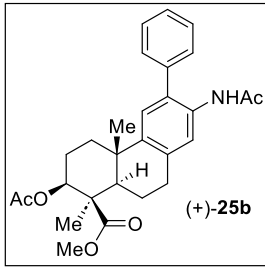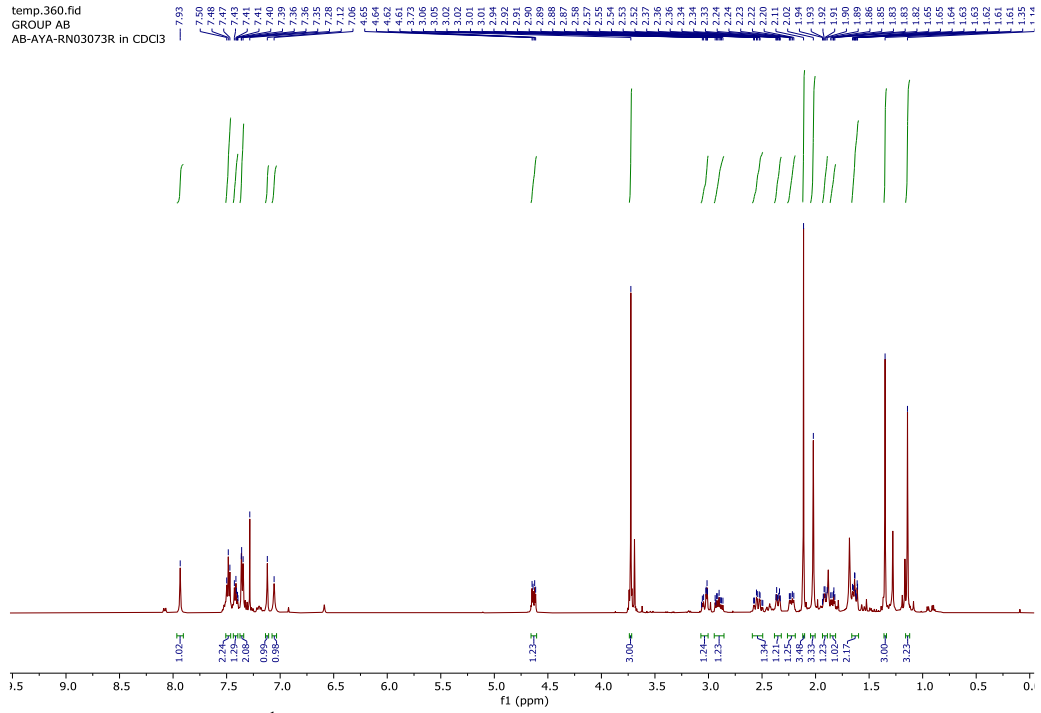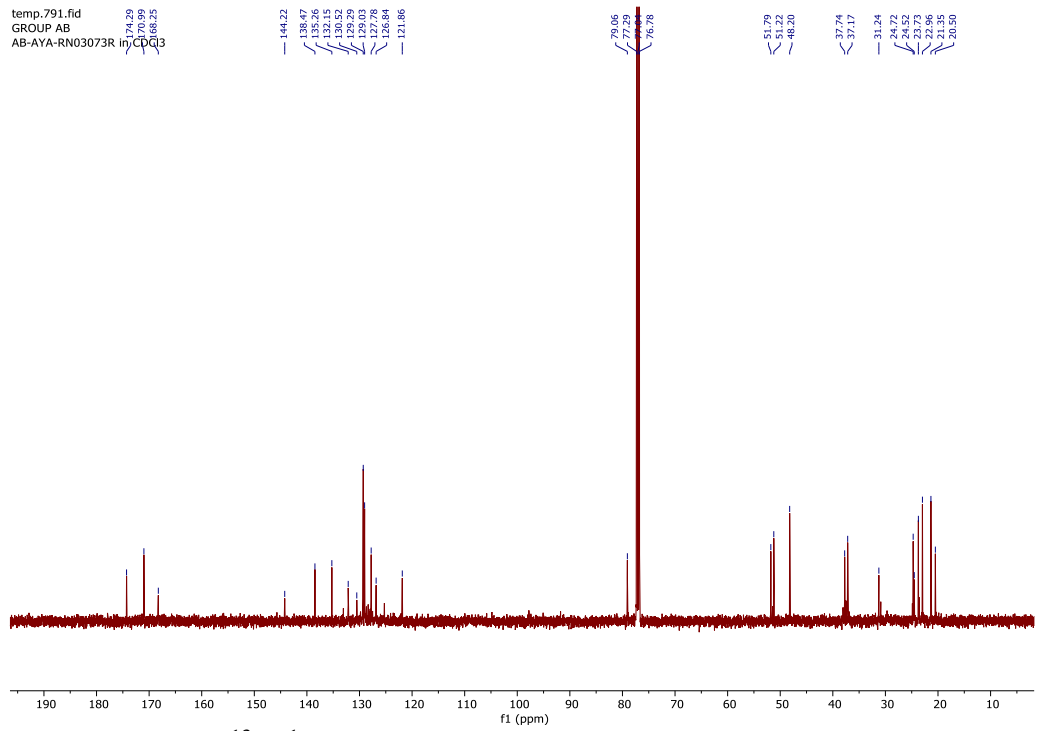

AB27-Mar-2024 12:50:32

IISER - KOLKATA

AB-SOV-01312a (0.053) Is (1.00,1.00) C<sub>28</sub>H<sub>34</sub>NO<sub>5</sub>

1: TOF MS ES+  
7.25e12

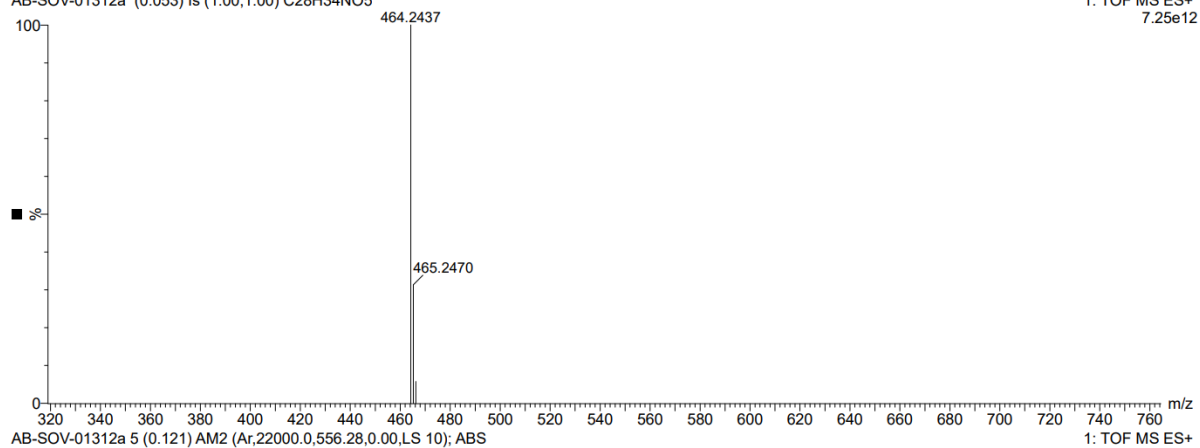

AB-SOV-01312a 5 (0.121) AM2 (Ar,22000.0,556.28,0.00,LS 10); ABS

1: TOF MS ES+  
3.27e6

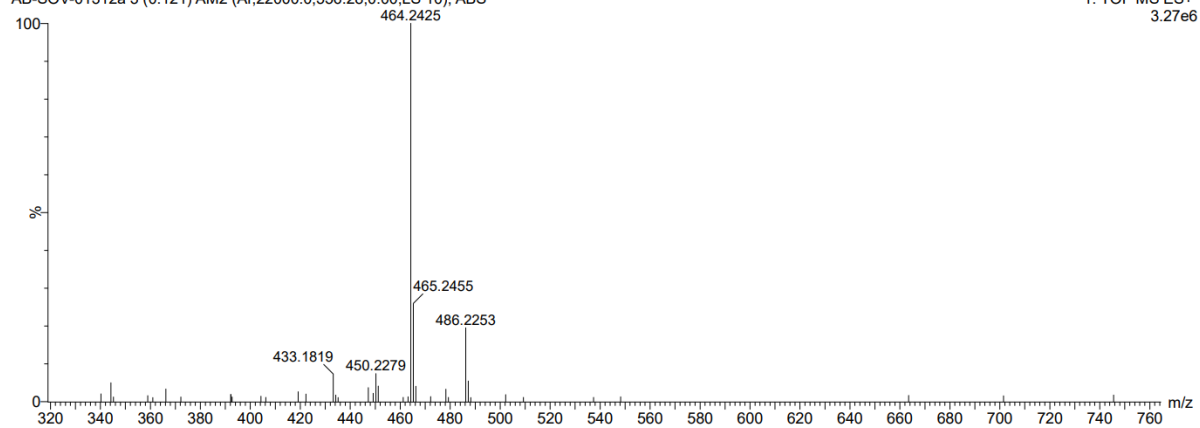

HRMS data of (+)-**25b**

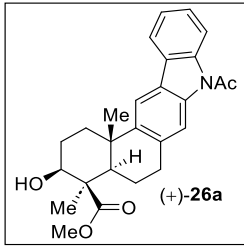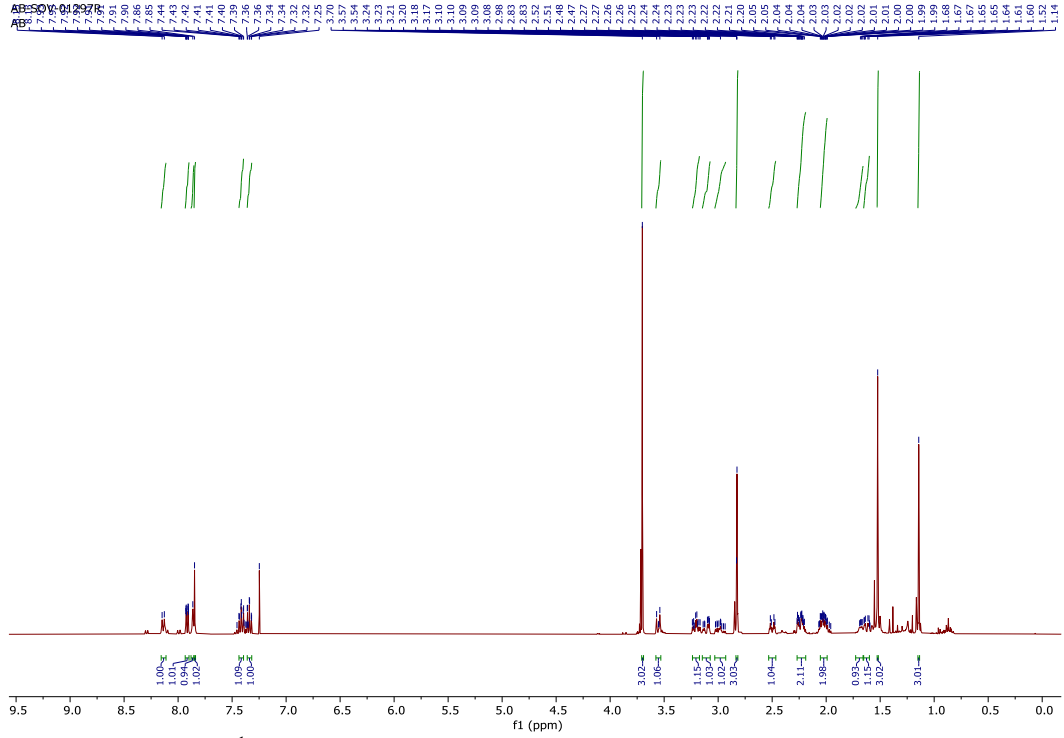

$^1\text{H}$  NMR (500 MHz,  $\text{CDCl}_3$ ) of compound (+)-26a

Dioridamycin NMR.240.fid  
GROUP AB  
AB-AOV-01267R in  $\text{CDCl}_3$

178.46  
169.96  
143.57  
138.90  
137.07  
135.08  
126.95  
126.66  
124.98  
123.63  
119.69  
116.25  
116.16  
76.08  
77.05  
76.79  
52.49  
49.07  
36.59  
33.74  
29.15  
27.65  
23.48  
21.23

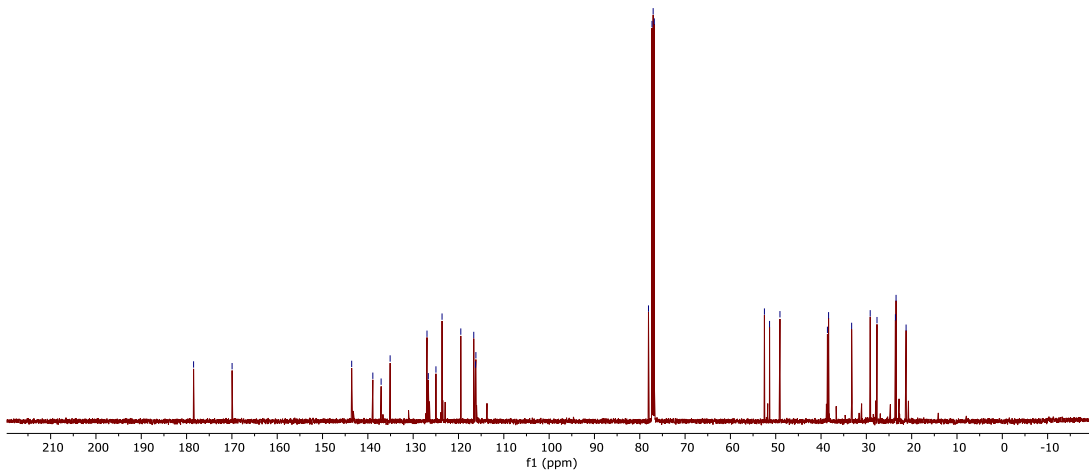

$^{13}\text{C}\{^1\text{H}\}$  NMR (125 MHz,  $\text{CDCl}_3$ ) of compound (+)-26a

# Display Report

## Analysis Info

Analysis Name D:\Data\User data\2022\APRIL\ab-rn-03074.d  
Method Tune\_pos\_Mid.m  
Sample Name ab-rn-03074  
Comment

Acquisition Date 4/22/2022 11:14:44 AM

Operator IISER Kolkata  
Instrument maXis impact 8282001.00127

## Acquisition Parameter

|             |          |                      |          |                  |           |
|-------------|----------|----------------------|----------|------------------|-----------|
| Source Type | ESI      | Ion Polarity         | Positive | Set Nebulizer    | 0.4 Bar   |
| Focus       | Active   | Set Capillary        | 3400 V   | Set Dry Heater   | 200 °C    |
| Scan Begin  | 50 m/z   | Set End Plate Offset | -500 V   | Set Dry Gas      | 4.0 l/min |
| Scan End    | 3000 m/z | Set Charging Voltage | 2000 V   | Set Divert Valve | Source    |
|             |          | Set Corona           | 0 nA     | Set APCI Heater  | 0 °C      |

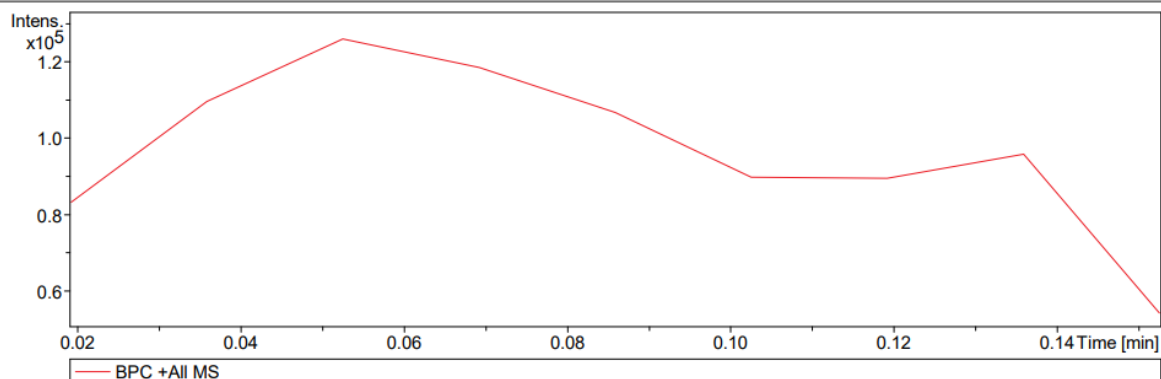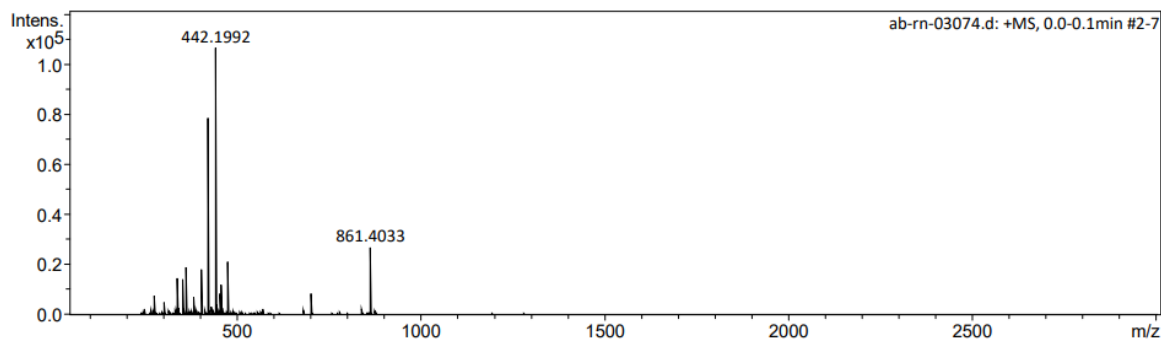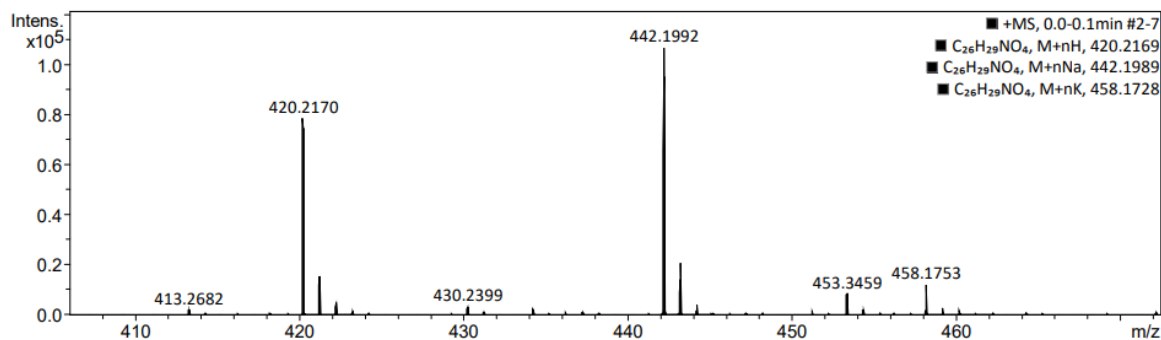

ab-rn-03074.d

Bruker Compass DataAnalysis 4.1

printed: 4/22/2022 11:17:37 AM

by: IISER Kolkata

Page 1 of 1

HRMS data of (+)-26a

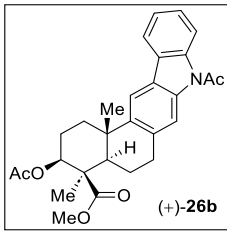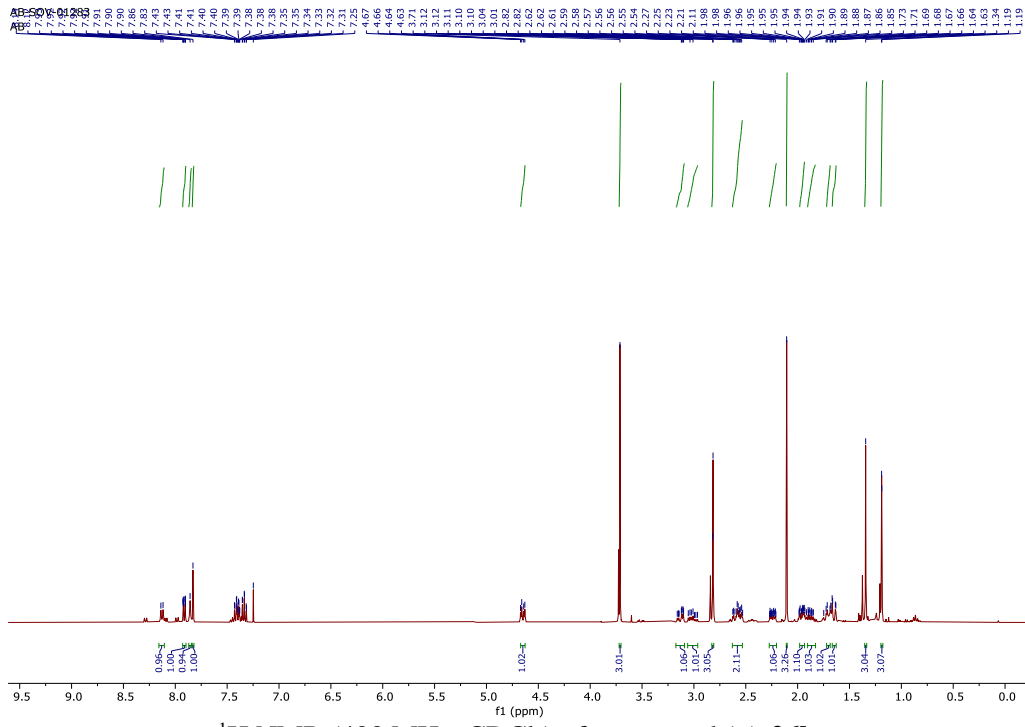

<sup>1</sup>H NMR (400 MHz, CDCl<sub>3</sub>) of compound (+)-26b

Dioridamycin NMR.330.fid  
GROUP AB-SOV-01297R-5  
CDCl<sub>3</sub>

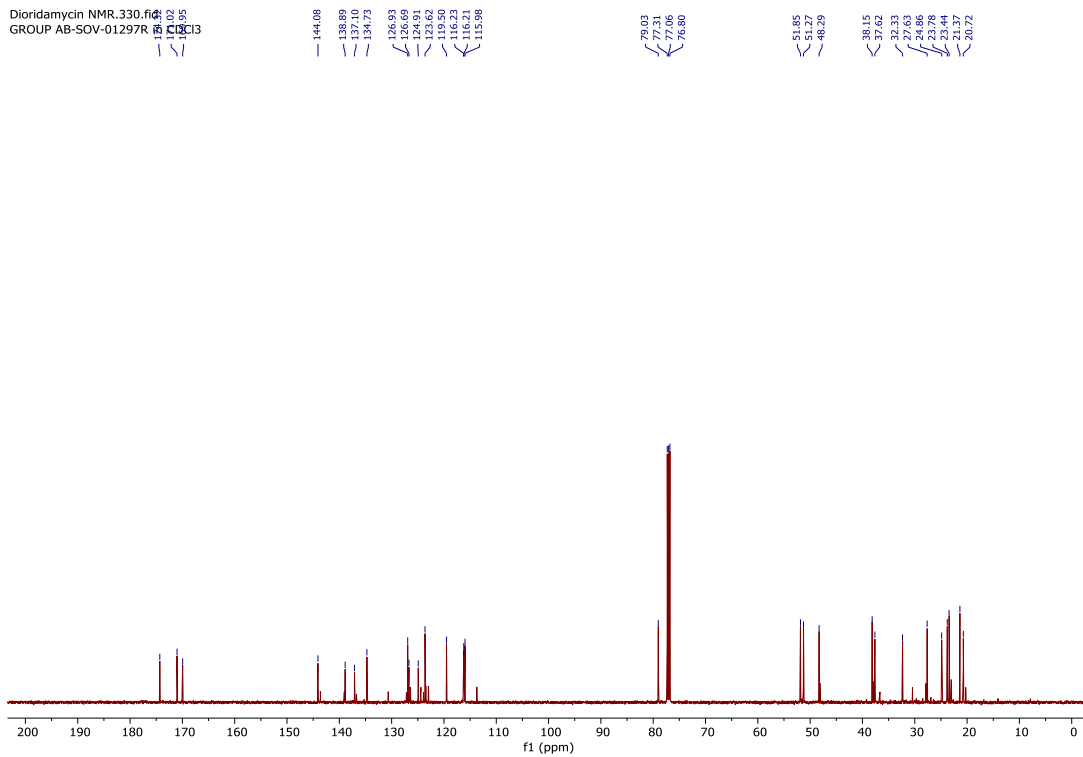

<sup>13</sup>C{<sup>1</sup>H} NMR (125 MHz, CDCl<sub>3</sub>) of compound (+)-26b

AB27-Mar-2024 12:48:55

AB-SOV-01278a (0.053) ls (1.00,1.00) C28H31NO5Na

IISER - KOLKATA

1: TOF MS ES+  
7.26e12

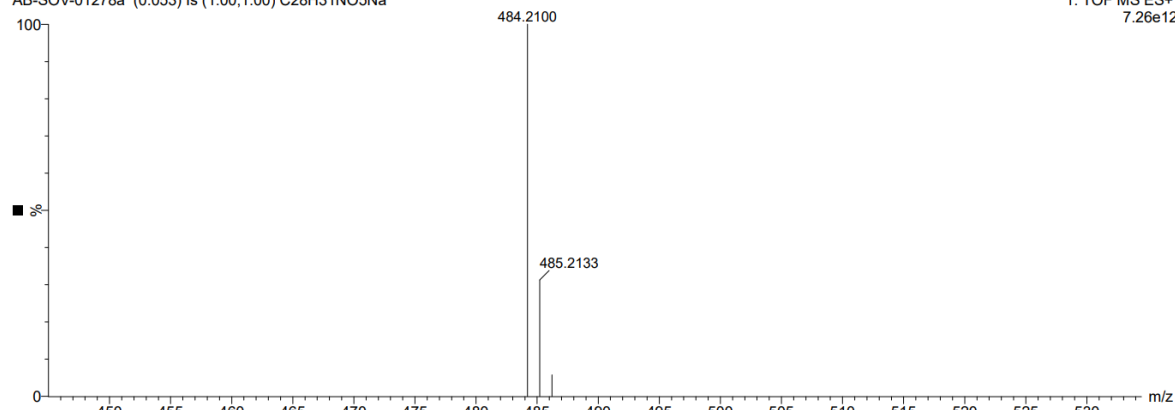

AB-SOV-01278a 3 (0.087) AM2 (Ar,22000.0,556.28,0.00,LS 10); ABS

1: TOF MS ES+  
2.29e6

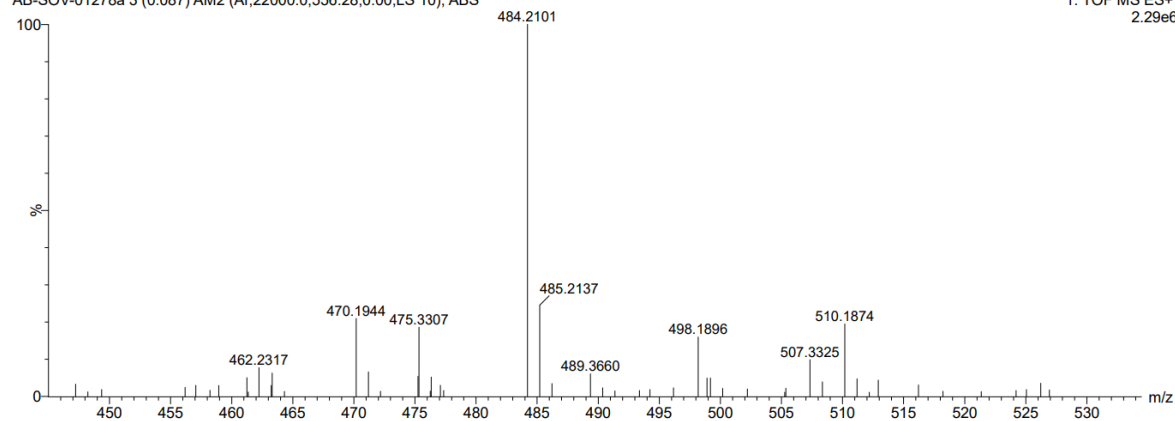

HRMS data of (+)-26b

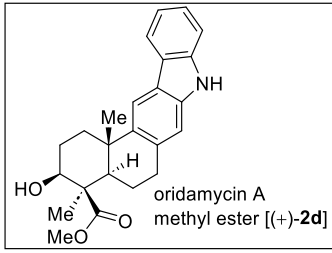

Sovan Desktop.120.fid  
GROUP AB  
AB-SOV-01285P in CDCl<sub>3</sub>

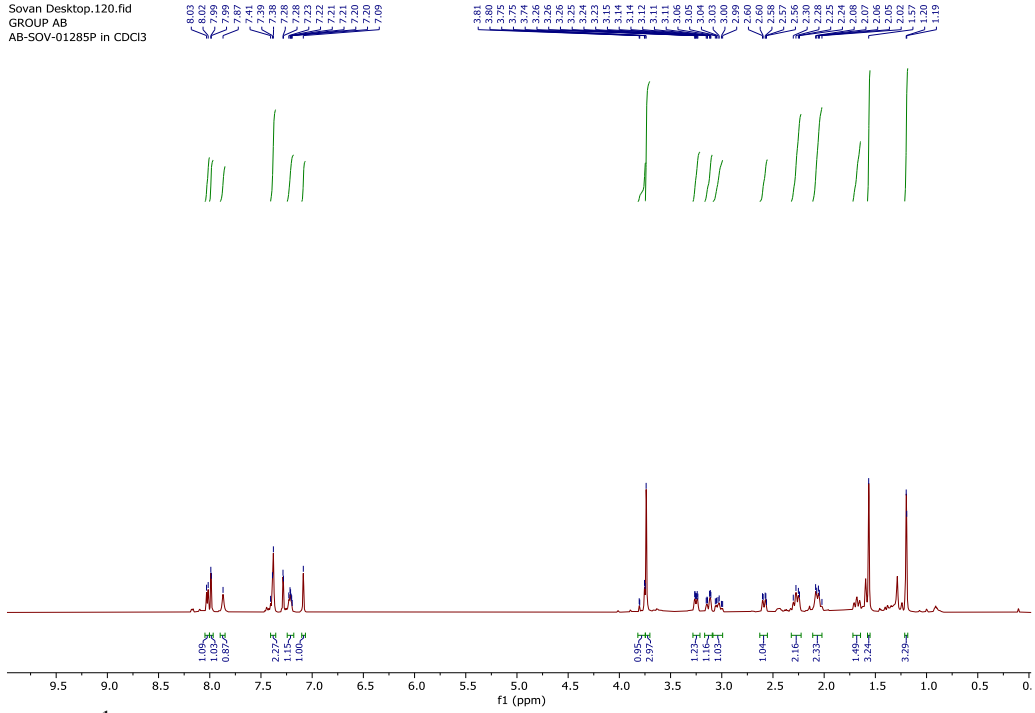

<sup>1</sup>H NMR (500 MHz, CDCl<sub>3</sub>) of oridamycin A methylester (+)-2d

Sovan Desktop.121.fid  
GROUP AB  
AB-SOV-01285P in CDCl<sub>3</sub>

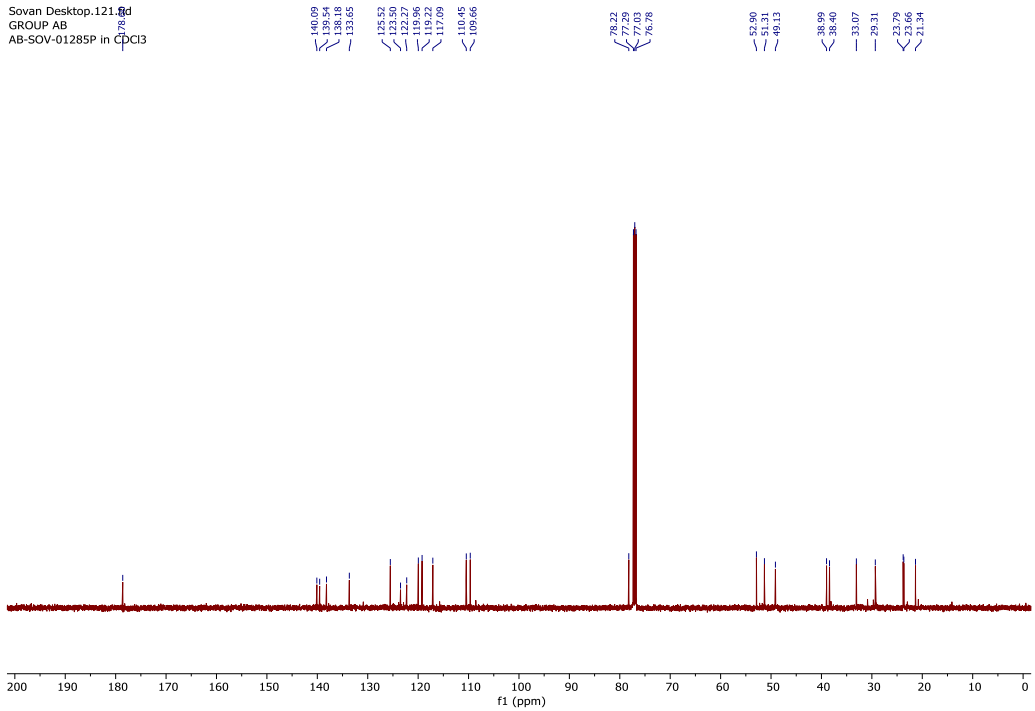

<sup>13</sup>C{<sup>1</sup>H} NMR (125 MHz, CDCl<sub>3</sub>) of oridamycin A methylester (+)-2d



AB28-Mar-2024 12:31:16

IISER - KOLKATA

AB-SOV-01280 (0.087) Is (1.00,1.00) C<sub>24</sub>H<sub>28</sub>NO<sub>3</sub>

1: TOF MS ES+  
7.62e12

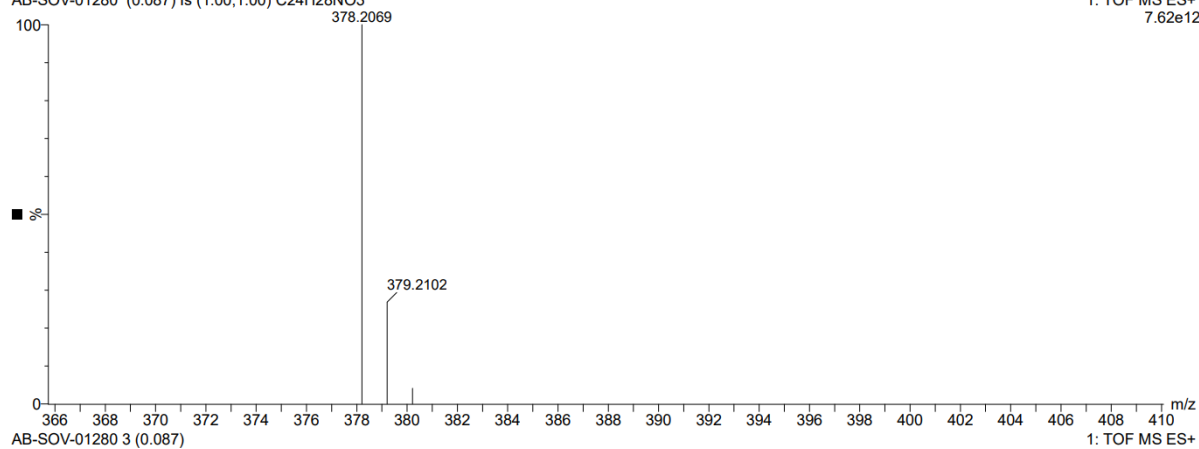

AB-SOV-01280 3 (0.087)

1: TOF MS ES+  
4.76e6

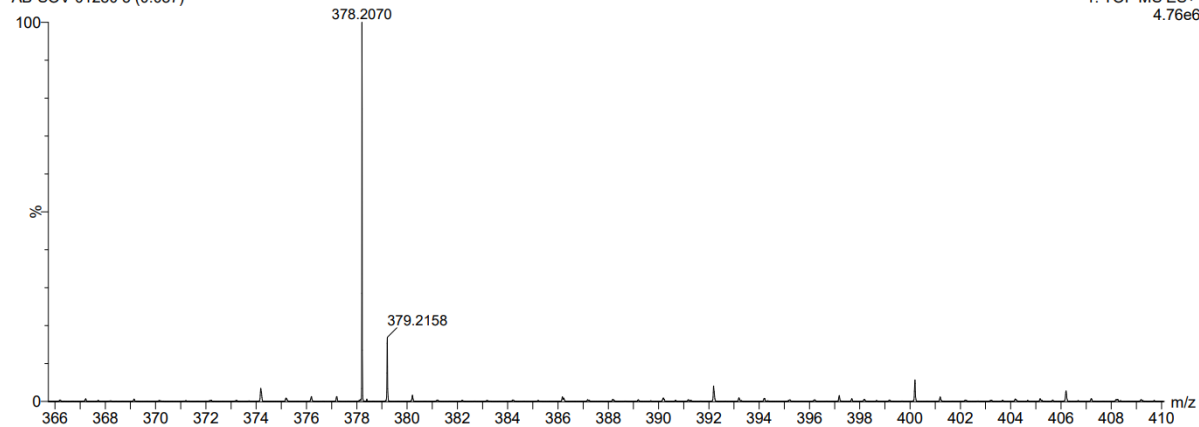

HRMS data of oridamycin A methylester (+)-**2d**

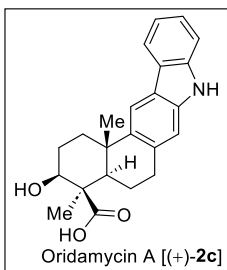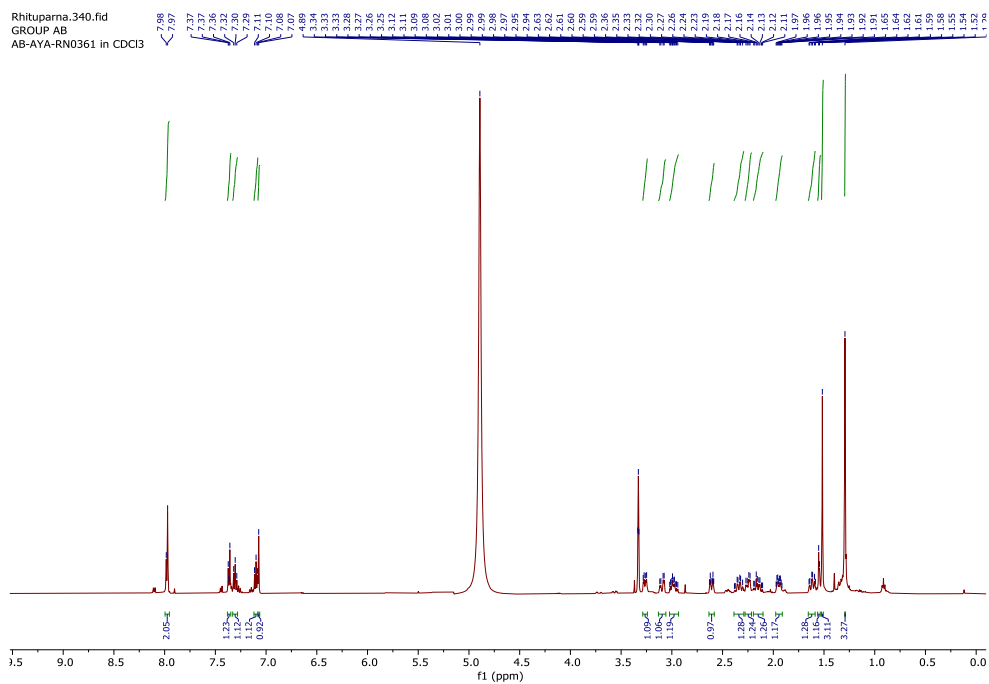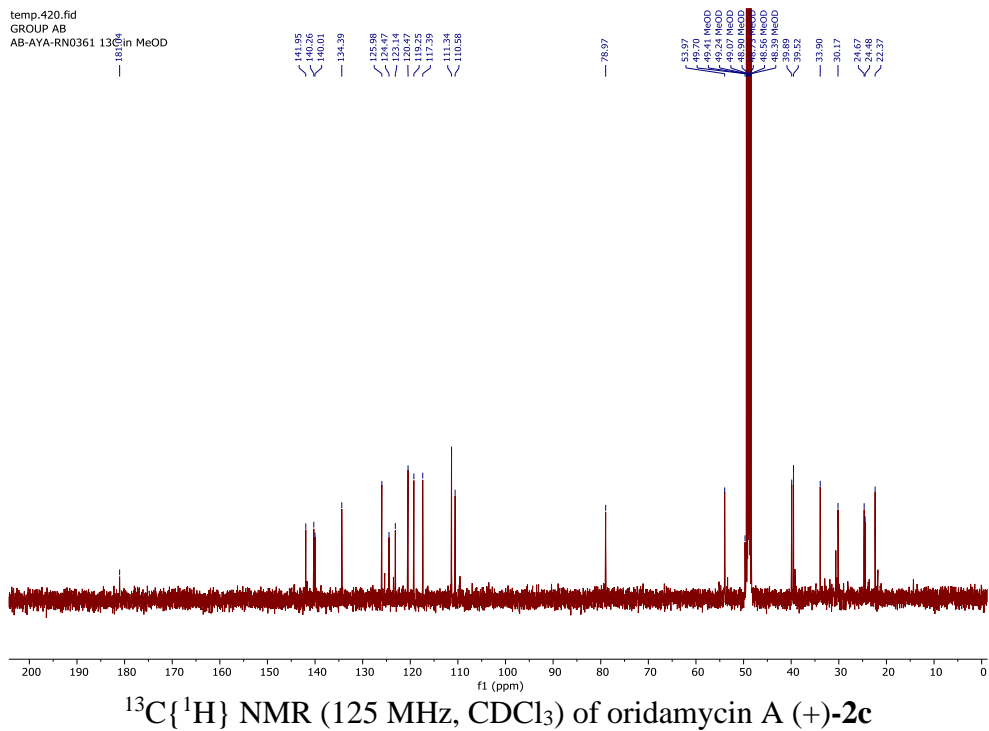

# Display Report

## Analysis Info

Analysis Name D:\Data\User data\2022\FEB\lab\_rn\_0361.d  
Method Tune\_pos\_Standard.m  
Sample Name ab\_rn\_0361  
Comment

Acquisition Date 2/9/2022 12:29:14 PM

Operator IISER Kolkata  
Instrument maXis impact 8282001.00127

## Acquisition Parameter

|             |          |                      |          |                  |           |
|-------------|----------|----------------------|----------|------------------|-----------|
| Source Type | ESI      | Ion Polarity         | Positive | Set Nebulizer    | 0.5 Bar   |
| Focus       | Active   | Set Capillary        | 3400 V   | Set Dry Heater   | 200 °C    |
| Scan Begin  | 50 m/z   | Set End Plate Offset | -500 V   | Set Dry Gas      | 4.0 l/min |
| Scan End    | 1000 m/z | Set Charging Voltage | 2000 V   | Set Divert Valve | Source    |
|             |          | Set Corona           | 0 nA     | Set APCI Heater  | 0 °C      |

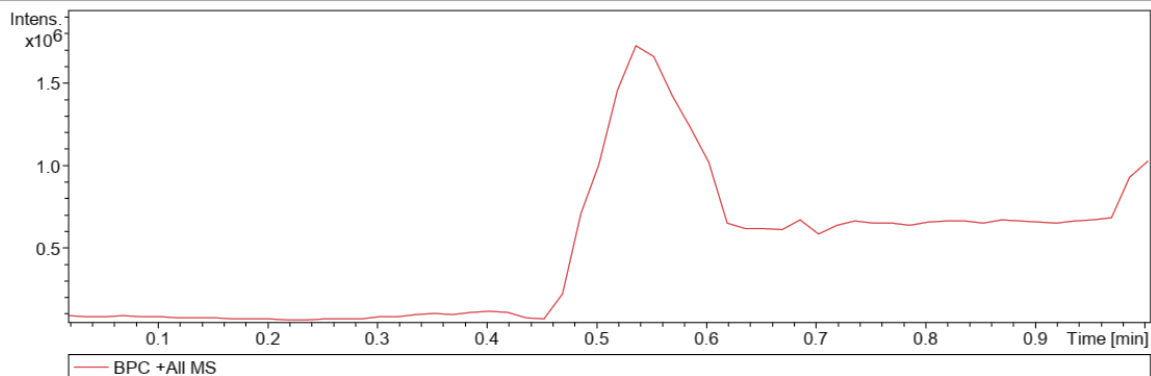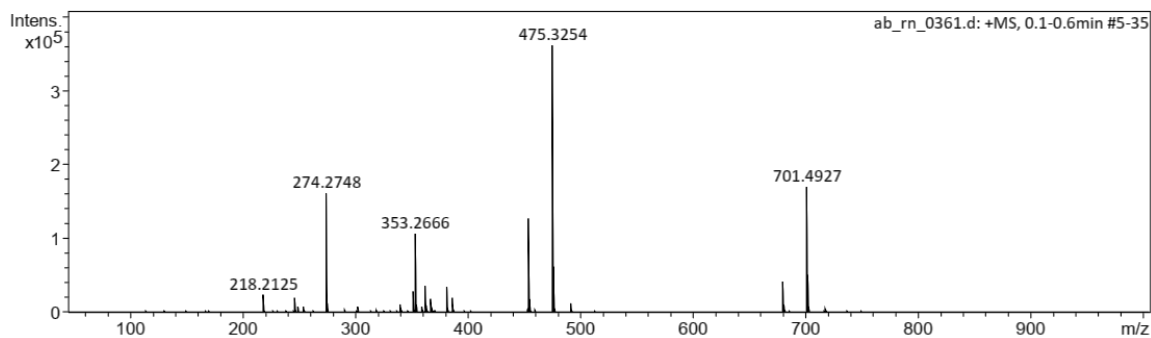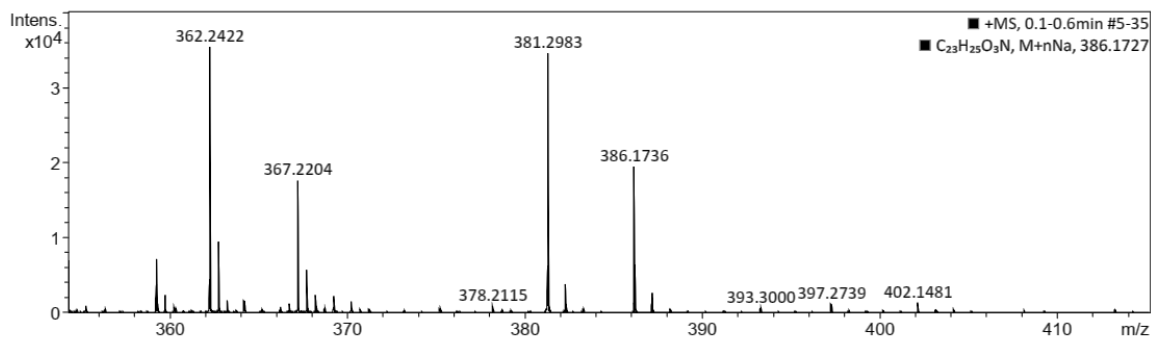

ab\_rn\_0361.d

Bruker Compass DataAnalysis 4.1

printed: 2/9/2022 12:32:21 PM

by: IISER Kolkata

Page 1 of 1

HRMS data of oridamycin A (+)-**2c**

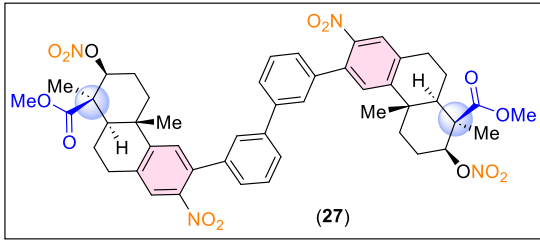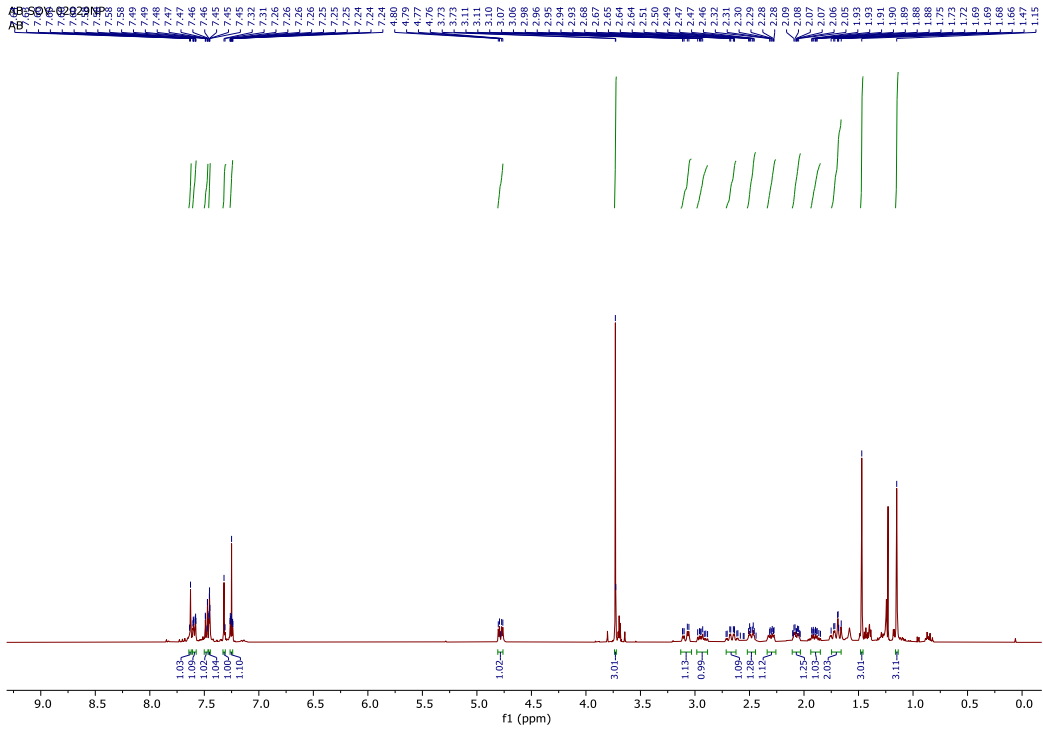

$^1\text{H}$  NMR (500 MHz,  $\text{CDCl}_3$ ) of (+)-27

Dioridamycin NMR.410.fid  
GROUP AB  
AB-SOV-02029 in  $\text{CDCl}_3$

173.10

152.14

146.03

141.14

138.36

135.69

132.84

129.19

128.10

127.16

126.83

124.82

87.60

77.59

77.24

77.04

76.78

51.97

51.88

48.50

38.45

36.95

30.77

23.84

22.73

20.07

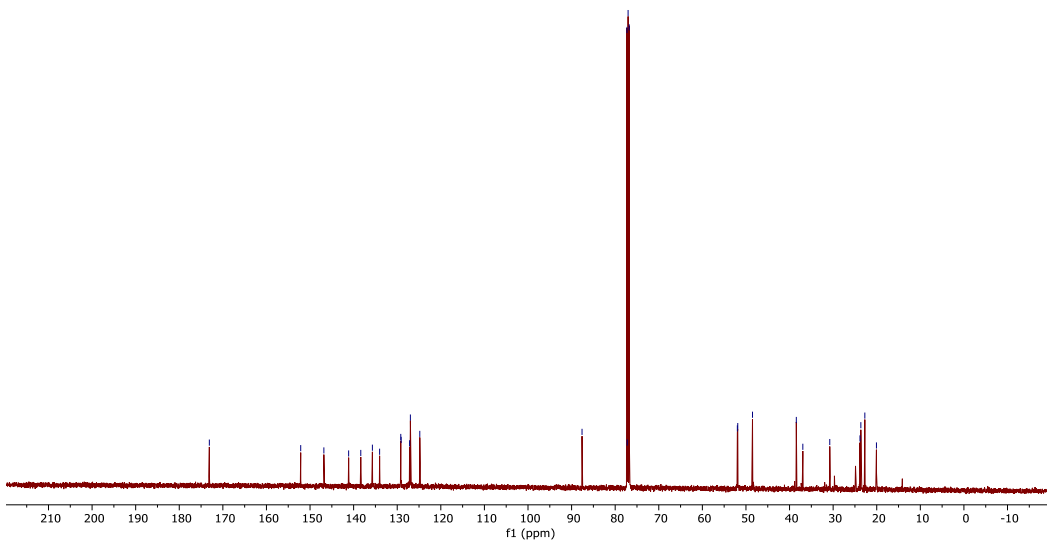

$^{13}\text{C}\{^1\text{H}\}$  NMR (125 MHz,  $\text{CDCl}_3$ ) of (+)-27

SK02-Aug-2024 14:02:42  
SK-SSK-02029 (0.053) Is (1.00,1.00) C48H50N4O14NH4

IISER - KOLKATA

1: TOF MS ES+  
5.63e12

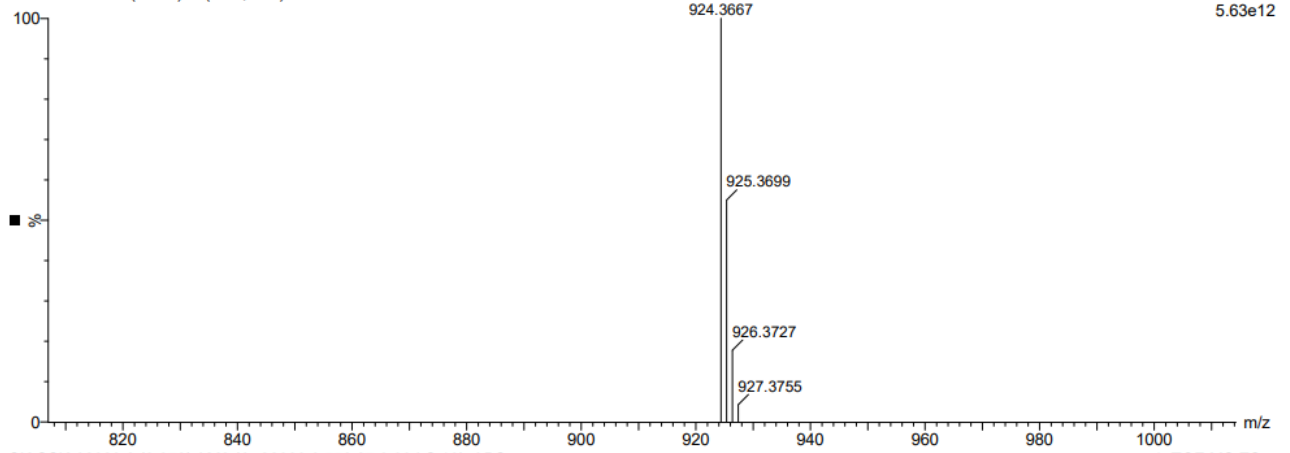

SK-SSK-02029 2 (0.070) AM2 (Ar,22000.0,556.27,0.00,LS 10); ABS

1: TOF MS ES+  
2.79e5

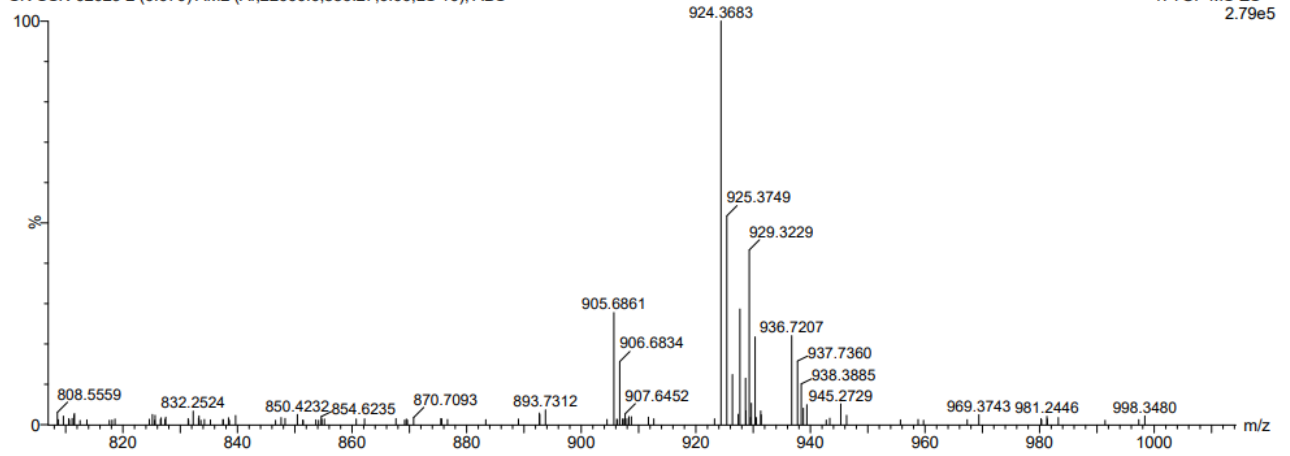

HRMS data of (+)-27

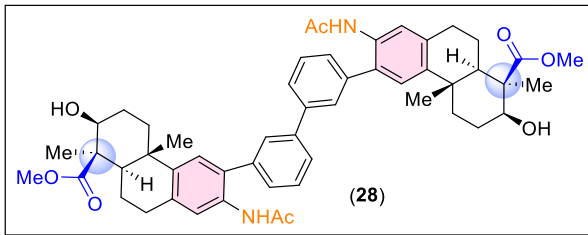

AB-SOV-02031  
AB

7.87  
7.60  
7.56  
7.54  
7.54  
7.52  
7.35  
7.33  
7.15  
7.07

3.69  
3.64  
3.51  
3.19  
3.18  
3.15  
3.13  
3.12  
3.07  
3.00  
2.96  
2.88  
2.87  
2.85  
2.83  
2.81  
2.79  
2.74  
2.22  
2.20  
2.17  
2.15  
2.11  
2.08  
2.00  
1.94  
1.92  
1.90  
1.86  
1.49  
1.06

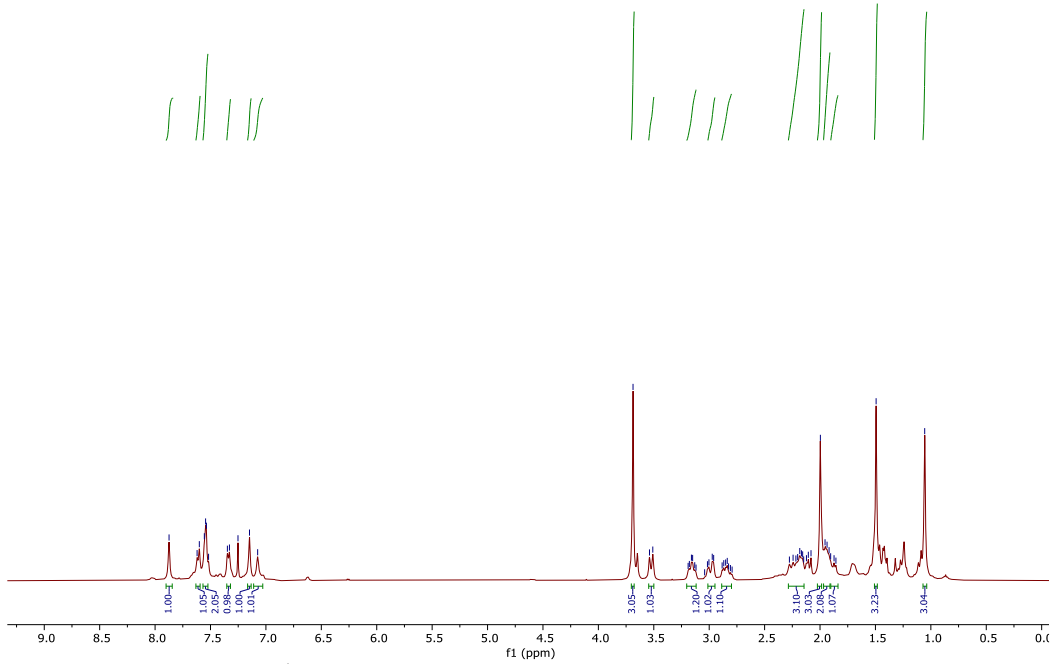

AB-DGJ-004  
AB

178.56

168.47

144.11  
144.55  
139.33  
136.00  
132.10  
129.62  
128.52  
128.20  
126.65  
122.47

78.12  
77.46  
76.83

52.40

51.68

49.03

38.18

38.01

32.14

29.05

24.65

23.61

23.01

21.04

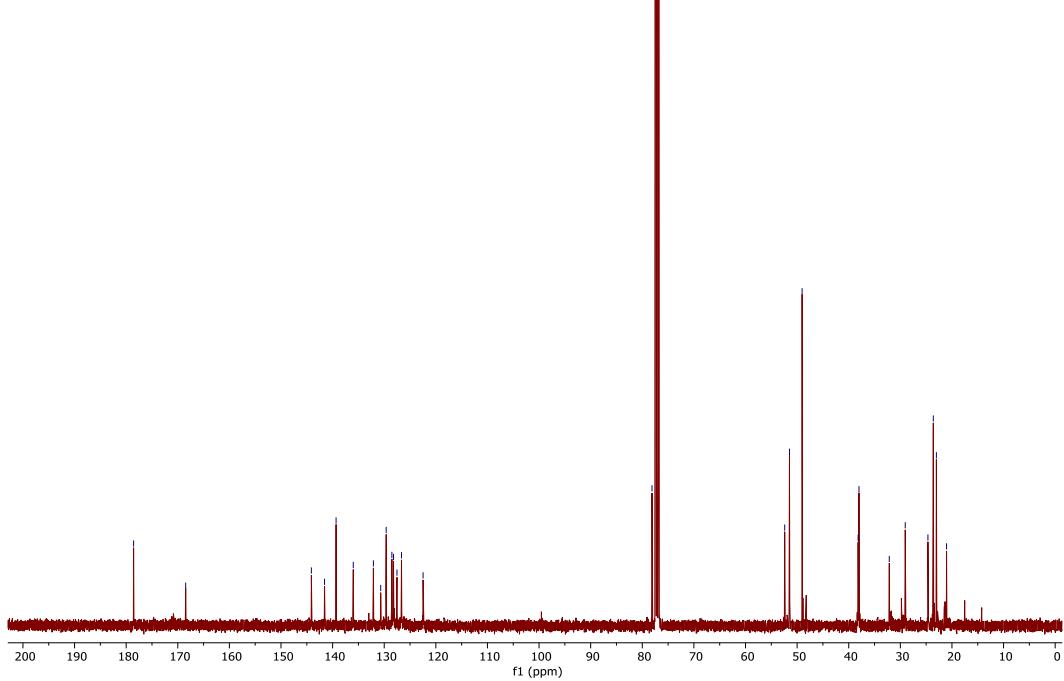

$^{13}\text{C}\{^1\text{H}\}$  NMR (125 MHz,  $\text{CDCl}_3$ ) of (+)-28

SK02-Aug-2024 14:02:42

SK-SSK-02029 (0.053) Is (1.00,1.00) C48H50N4O14NH4

IISER - KOLKATA

1: TOF MS ES+  
5.63e12

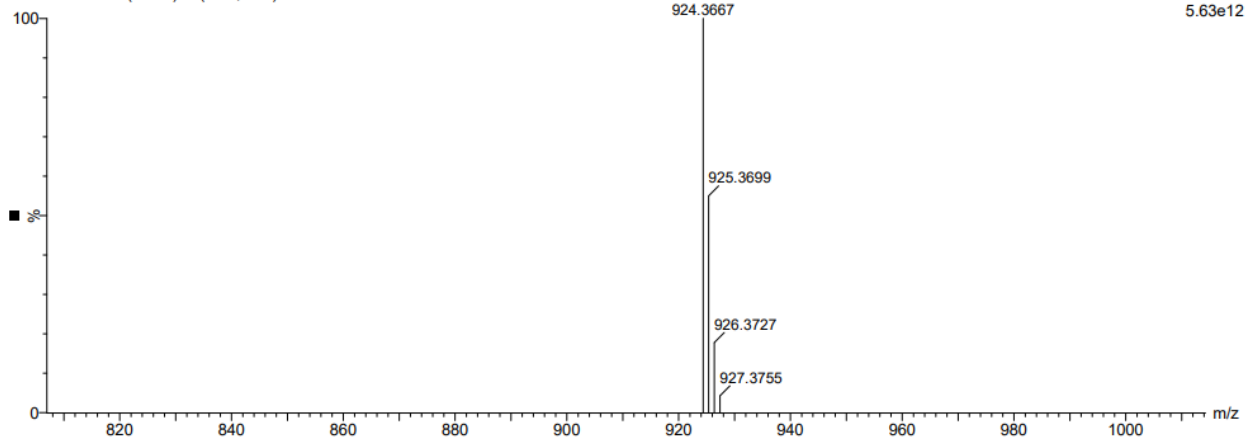

SK-SSK-02029 2 (0.070) AM2 (Ar,22000.0,556.27,0.00,LS 10); ABS

1: TOF MS ES+  
2.79e5

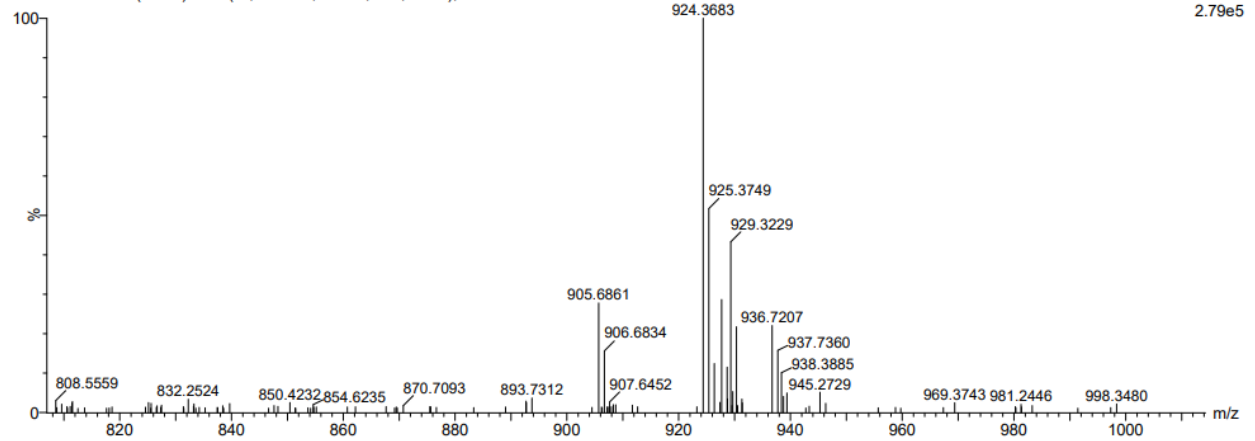

HRMS data of (+)-28

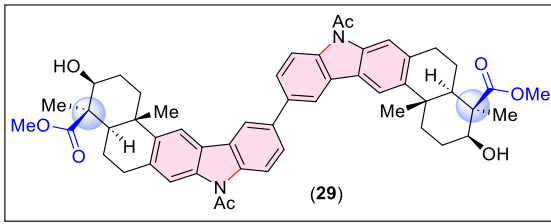

AB-SOV-02032 1  
AB

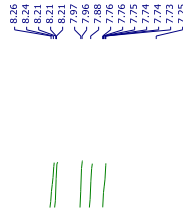

3.72  
3.72  
3.71  
3.24  
3.24  
3.21  
3.20  
3.17  
3.13  
3.13  
3.06  
3.04  
3.02  
3.01  
2.99  
2.87  
2.87  
2.59  
2.58  
2.56  
2.27  
2.27  
2.25  
2.24  
2.24  
2.22  
2.11  
2.11  
2.07  
2.07  
2.06  
2.06  
2.03  
2.03  
2.01  
1.67  
1.65  
1.64  
1.64  
1.14

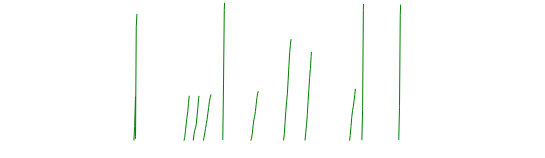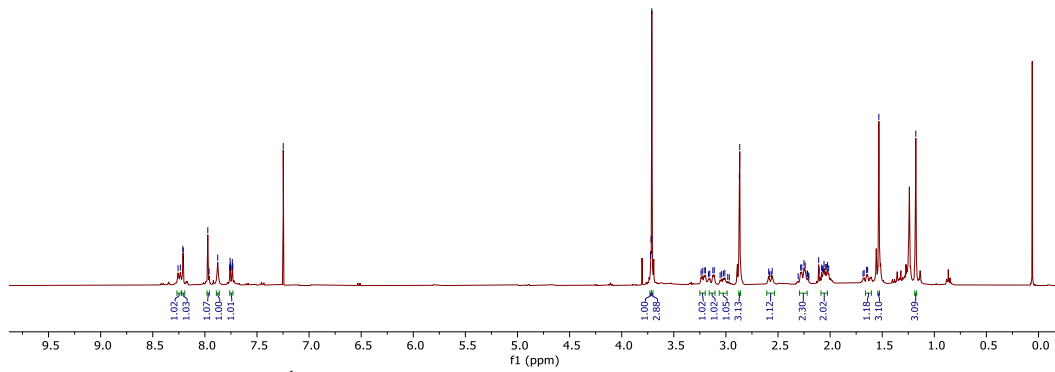

<sup>1</sup>H NMR (500 MHz, CDCl<sub>3</sub>) of (+)-29

AB-SOV-02032 1  
AB

178.56  
178.54  
170.01

143.80  
138.32  
137.55  
136.75  
135.46  
127.38  
126.38  
124.41  
118.00  
116.95  
116.72  
116.28

78.54  
77.44  
76.80

52.56  
51.49  
49.13

38.73  
38.47  
33.38  
29.79  
27.78  
23.67  
23.36  
21.30

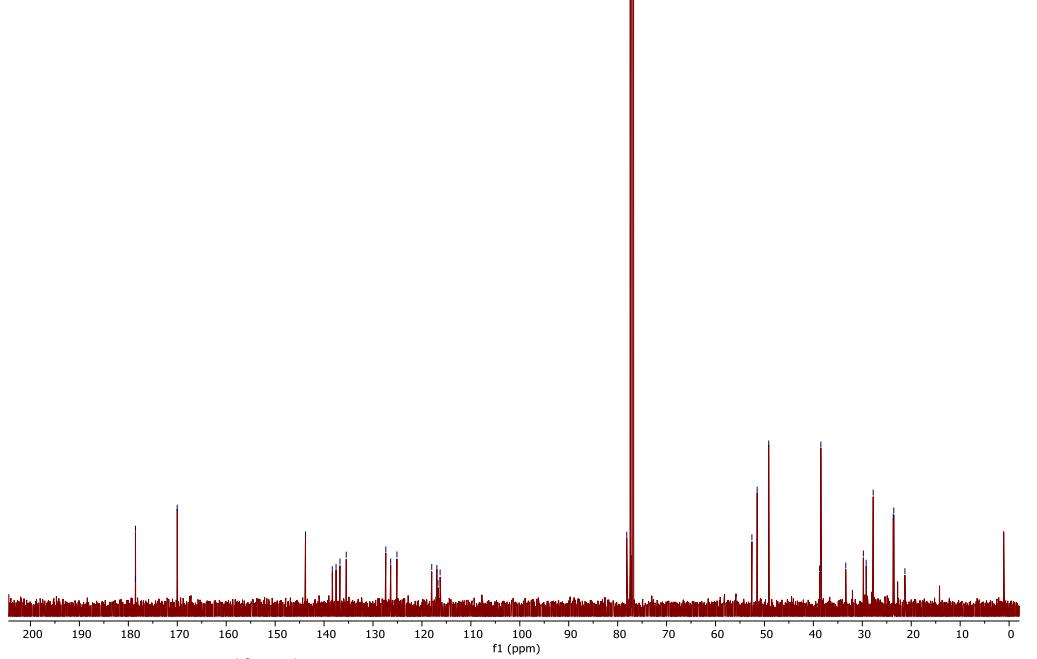

<sup>13</sup>C{<sup>1</sup>H} NMR (125 MHz, CDCl<sub>3</sub>) of (+)-29



SK22-Jul-2024 15:42:15  
SK-SSK-02032 (0.053) Is (1.00,1.00) C52H57N2O8

IISER - KOLKATA

1: TOF MS ES+  
5.53e12

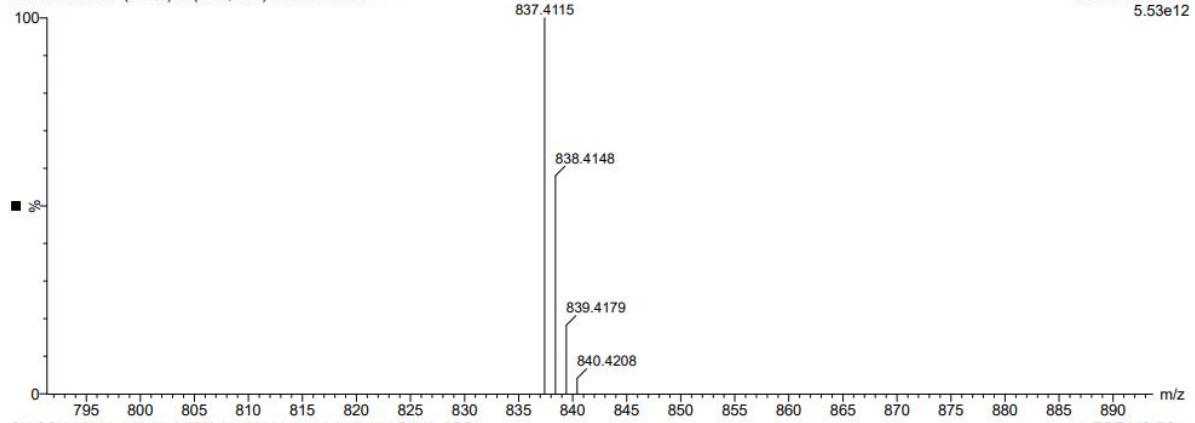

SK-SSK-02032 3 (0.087) AM2 (Ar,22000.0,556.25,0.00,LS 10); ABS

1: TOF MS ES+  
2.67e5

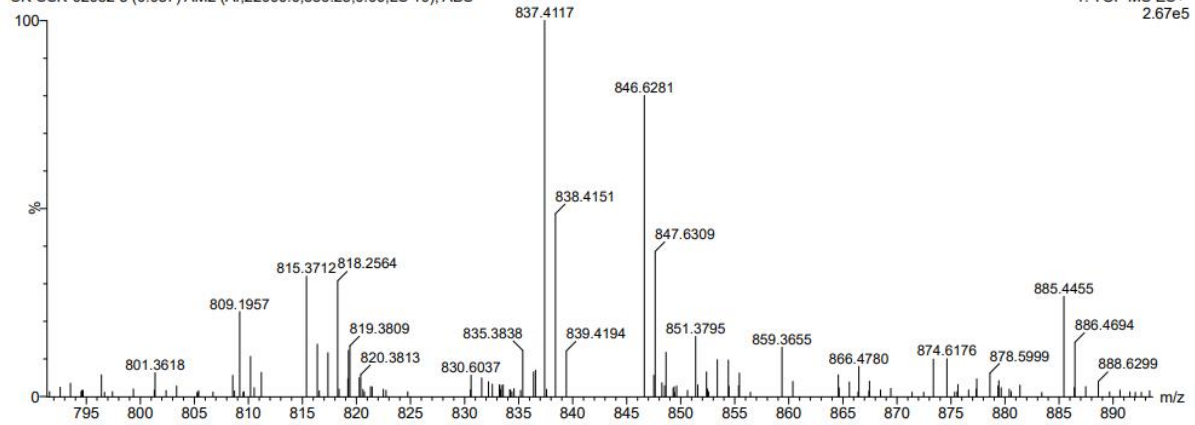

HRMS data of (+)-**29**

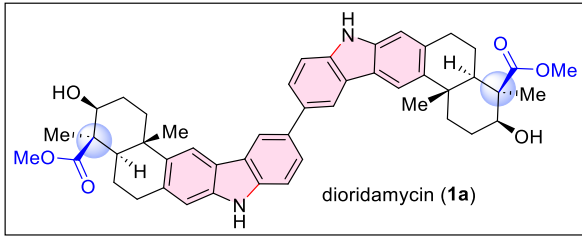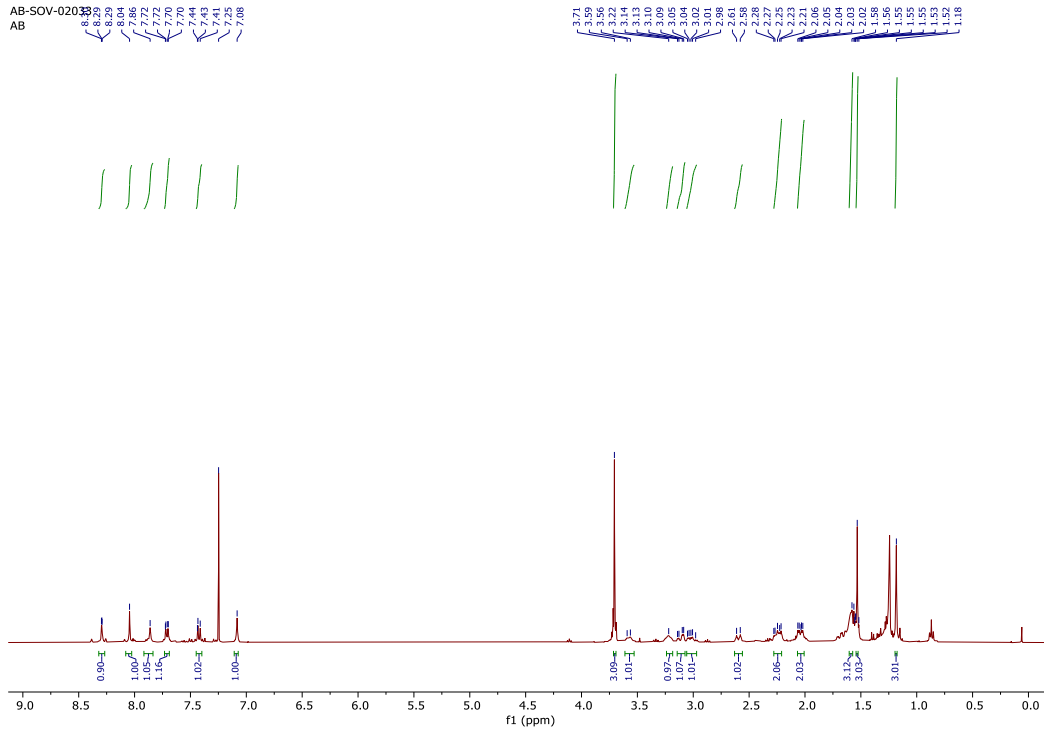

<sup>1</sup>H NMR (500 MHz, CDCl<sub>3</sub>) of (+)-1a

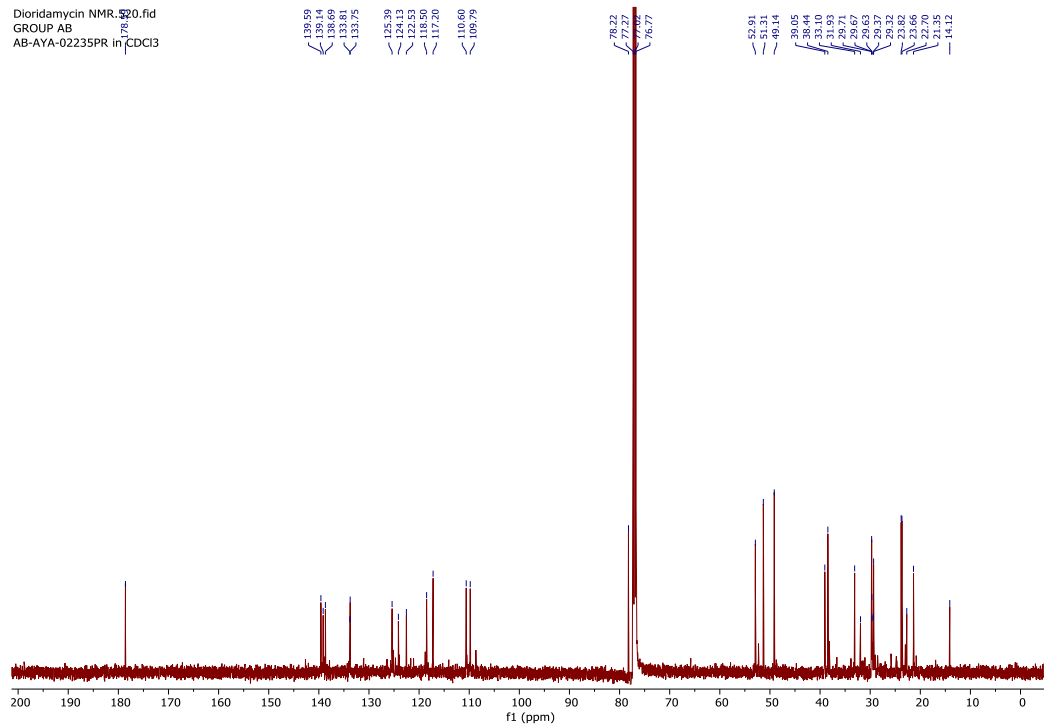

<sup>13</sup>C{<sup>1</sup>H} NMR (125 MHz, CDCl<sub>3</sub>) of (+)-1a

SK22-Jul-2024 15:40:42  
SK-SSK-02033 (0.053) Is (1.00,1.00) C<sub>48</sub>H<sub>52</sub>N<sub>2</sub>O<sub>6</sub>Na

IISER - KOLKATA

1: TOF MS ES+  
5.80e12

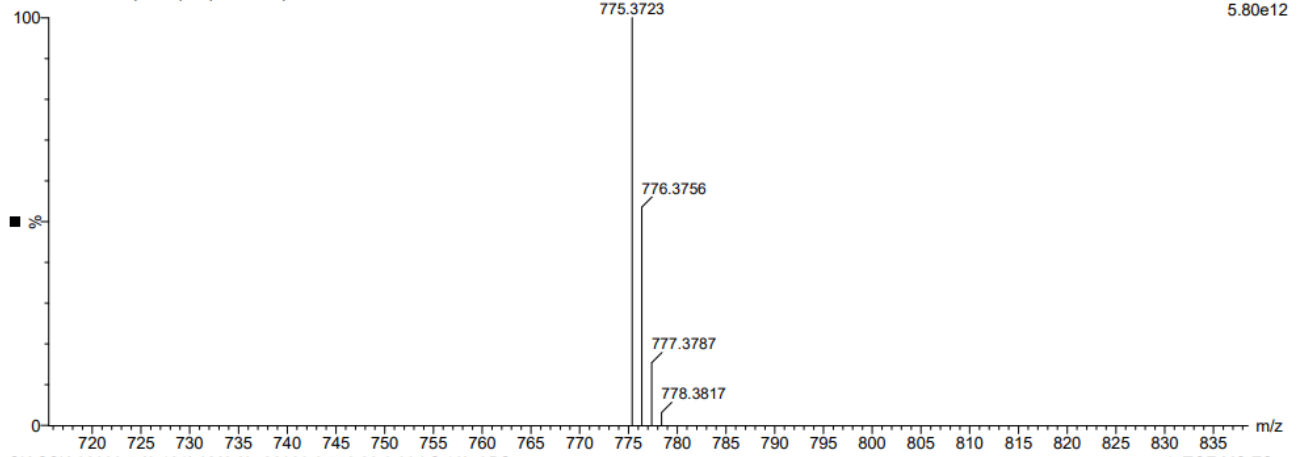

SK-SSK-02033 5 (0.121) AM2 (Ar,22000.0,556.28,0.00,LS 10); ABS

1: TOF MS ES+  
2.10e4

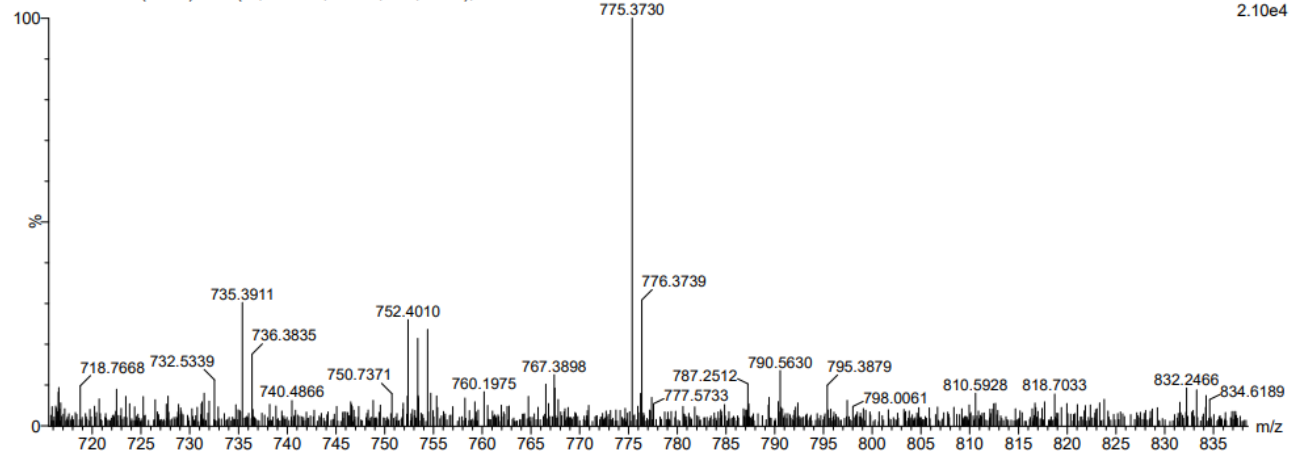

HRMS data of (+)-**1a**
