# Supplementary material for: Highly regioselective oxidative Csp2–H amination for indolosesquiterpene alkaloids: total synthesis of (+)-dioridamycin
Source: Royal Society of Chemistry journal article supplement (doi:10.1039/d4qo01773k), 2024-11-26
Supplement: d4qo01773k2.pdf [file d4qo01773k2.pdf]

Supplemental material for:

## Highly Regioselective Oxidative Csp<sup>2</sup>-H Amination for Indolosesquiterpene Alkaloids: Total Synthesis of (+)- Dioridamycin

Rhituparna Nandi,<sup>§a</sup> Sovan Niyogi,<sup>§b</sup> Sourav Kundu,<sup>b</sup> Ayan Mondal,<sup>b</sup> Nanda Kishore Roy,<sup>b</sup>  
and Alakesh Bisai\*<sup>a,b</sup>

<sup>a</sup>Department of Chemistry, Indian Institute of Science Education and Research Bhopal,  
Bhopal Bypass Road, Bhopal, MP - 462 066, India.

<sup>b</sup>Department of Chemical Sciences, Indian Institute of Science Education and Research  
Kolkata, Mohanpur, Nadia, WB - 741 246, India.

e-Mail: [alakesh@iiserkol.ac.in](mailto:alakesh@iiserkol.ac.in), [alakeshb@gmail.com](mailto:alakeshb@gmail.com)

### Table of Contents

|                                                                       |          |
|-----------------------------------------------------------------------|----------|
| Materials and Methods                                                 | S02      |
| Synthesis of substrates (deoxy-xiamycin derivatives)                  | S03-S17  |
| General procedure for the synthesis of regioisomer of deoxy-xiamycin  | S17-S25  |
| Synthesis of substrates (deoxy-oridamycin derivatives)                | S25-S29  |
| General procedure for PIDA mediated intramolecular C-N bond formation | S29-S30  |
| Substrates Scope of Carbazole Synthesis                               | S30-S45  |
| Synthesis of biaryl acetanilide of xiamycin A                         | S46-S48  |
| Total Synthesis of (+)-Xiamycin A methyl ester [(+)- <b>2b</b> ]      | S49-S50  |
| Total Synthesis of (+)-Xiamycin A [(+)- <b>2a</b> ]                   | S50-S55  |
| Total synthesis of Dixiamycin [(+)- <b>1b</b> ]                       | S56-S62  |
| Synthesis of oridamycin tricyclic scaffolds                           | S63-S73  |
| Conversion of compound <i>epi</i> - <b>11</b> to biaryl acetanilides  | S73-S79  |
| Total Synthesis of (+)-Oridamycin A methyl ester [(+)- <b>2d</b> ]    | S80-S81  |
| Total Synthesis of (+)-Oridamycin A [(+)- <b>2c</b> ]                 | S81-S86  |
| Total Synthesis of Dioridamycin [(+)- <b>1a</b> ]                     | S86-S94  |
| Crystal Data and Structure Refinement of (+)- <b>24</b>               | S95-S105 |
| References                                                            | S106     |

## Materials and Methods

Unless otherwise stated, reactions were carried out using oven dried glass ware with Teflon coated magnetic stirring bars were used to stir the reactions. The Syringe was used to transfer the solvents and liquid reagents. Tetrahydrofuran (THF) Diethyl ether (Et<sub>2</sub>O) were distilled over sodium/benzophenone ketyl. Dichloromethane (CH<sub>2</sub>Cl<sub>2</sub>) was distilled over calcium hydride. All other solvents like MeOH, EtOAc, DMF, Dichloroethane (DCE) and reagents were used as received. Reaction temperatures above 25 °C were maintained by using oil bath on a magnetic stirrer. Thin layer chromatography (TLC) analysis was performed by using silica gel precoated plates (0.25 mm) 60 (F-254), Visualized by UV irradiation, yellow dip stain and other stains. Silica gel of particle size 230-400 and 100-200 mesh were used to perform flash chromatography. Digital melting point apparatus is used to record the melting points. <sup>1</sup>H-NMR spectra were recorded by using 400, 500 MHz spectrometers, <sup>13</sup>C-NMR operating frequencies are 100, 125 MHz respectively. Chemical shifts (δ) are reported in ppm relative to the residual solvents (CDCl<sub>3</sub>) signal (δ = 7.29 for <sup>1</sup>H NMR and δ = 77.0 for <sup>13</sup>C NMR) and (CD<sub>3</sub>OD) signal (δ = 3.33 for <sup>1</sup>H NMR and δ = 49.0 for <sup>13</sup>C NMR). Data for <sup>1</sup>H NMR spectra are reported as follows: chemical shift (multiplicity, coupling constants, and number of hydrogen). Abbreviations are as follows: s (singlet), d (doublet), t (triplet), q (quartet), m (multiplet), br (broad). IR spectra were recorded on a FT-IR system (Spectrum BX) and are reported in frequency of absorption (cm<sup>-1</sup>). Only selected IR absorbencies are reported. High Resolution Mass Spectrometry (HRMS) data was recorded on MicrOTOF-Q-II mass spectrometer using methanol as solvent.

## Synthesis of compound (+)-S2:

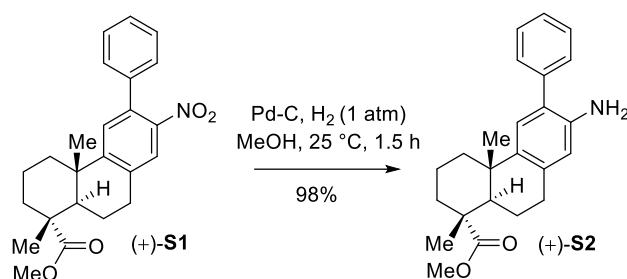

In an oven-dried round-bottom flask compound (+)-S1 (1.1 g, 2.79 mmol, 1.0 equiv.) was taken in MeOH (20 mL) and degassed with N<sub>2</sub> balloon for 10 minutes. To this solution Pd/C (10% w/w) (110 mg) was added and a H<sub>2</sub> gas balloon (1 atm.) was placed with the reaction vessel and stirring continued until the full consumption of starting material (1.5 h), as confirmed by TLC analysis. The reaction mixture was filtered, evaporated to dryness under the reduced pressure. The crude product was purified by flash column chromatography with 20% EtOAc in *n*-hexane to afford (+)-S2 as yellow foam (996 mg, 98%). For characterization of compound (+)-S1 see ref. 1.

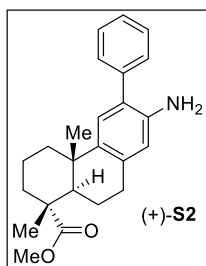

**Methyl (1*R*,4*aS*,10*aR*)-7-amino-1,4*a*-dimethyl-6-phenyl-1,2,3,4,4*a*,9,10,10*a*-octahydrophenanthrene-1-carboxylate [(+)-S2]:** (+)-S2 was obtained as colourless liquid (2.79 mmol scale of reaction; 996 mg; 98%). *R*<sub>f</sub> = 0.2 (10 % EtOAc in *n*-hexane).

**<sup>1</sup>H NMR** (500 MHz, CDCl<sub>3</sub>): δ 7.48 (h, *J* = 8.8, 8.0 Hz, 4H), 7.37 (qt, *J* = 6.5, 2.3 Hz, 1H), 7.05 (s, 1H), 6.50 (s, 1H), 3.71 (s, 3H), 2.89 (td, *J* = 10.3, 9.5, 7.1 Hz, 2H), 2.30 (dd, *J* = 12.5, 2.4 Hz, 2H), 1.92 – 1.84 (m, 1H), 1.84 – 1.75 (m, 2H), 1.69 (ddd, *J* = 15.6, 10.2, 2.5 Hz, 2H), 1.54 (td, *J* = 12.6, 4.1 Hz, 1H), 1.47 – 1.41 (m, 1H), 1.31 (s, 3H), 1.26 (s, 3H).

**<sup>13</sup>C NMR** (125 MHz, CDCl<sub>3</sub>): δ 179.2, 140.9, 140.5, 139.9, 135.5, 129.2, 128.7, 126.9, 126.4, 126.0, 115.5, 51.9, 47.7, 45.2, 38.2, 36.7, 36.6, 29.8, 25.3, 21.7, 18.6, 16.5.

**IR** (neat)  $\nu_{\max}$  3402, 3353, 2832, 1713, 1678, 1619, 1281, 1155, 764  $\text{cm}^{-1}$ .

$[\alpha]_{589}^{25} = +31.50$  ( $c = 0.92$ ,  $\text{CH}_3\text{OH}$ ).

### Synthesis of 2-aryl acetanilide (+)-S3:

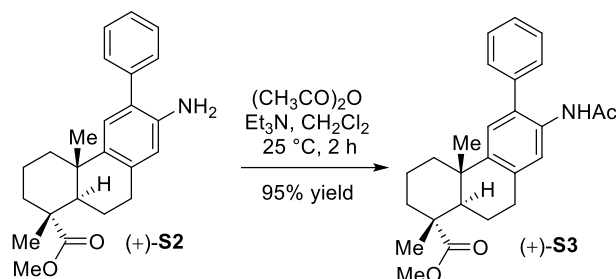

In an oven dried round-bottom flask, compound (+)-S2 (121 mg, 0.33 mmol., 1.0 equiv.) was taken in  $\text{CH}_2\text{Cl}_2$  (5 mL) and  $\text{Et}_3\text{N}$  (55  $\mu\text{L}$ , 0.396 mmol., 1.2 equiv.) was added to the reaction mixture. Next, acetic anhydride (37  $\mu\text{L}$ , 0.363 mmol., 1.1 equiv.) was added to the reaction mixture at 25  $^\circ\text{C}$  and stirring continued until the full consumption of starting material. Upon completion (2 h), as monitored by TLC analysis, it was extracted with  $\text{CH}_2\text{Cl}_2$  (5 mL X 2). The organic layers were dried over  $\text{Na}_2\text{SO}_4$  and concentrated in a rotary evaporator under reduced pressure. The crude product was purified by flash column chromatography with 40% EtOAc in *n*-hexane to afford (+)-S3 as yellow foam (127 mg, 95%).

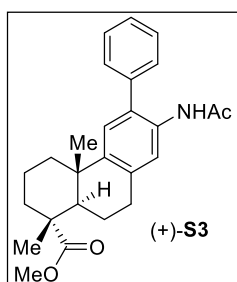

**Methyl** (1R,4aS,10aR)-7-acetamido-1,4a-dimethyl-6-phenyl-1,2,3,4,4a,9,10,10a-octahydrophenanthrene-1-carboxylate [(+)-S3]: (+)-S3 was obtained as yellow foam (0.33 mmol scale of reaction; 127 mg; 95%).  $R_f = 0.2$  (30 % EtOAc in *n*-hexane).

**$^1\text{H NMR}$**  (500 MHz,  $\text{CDCl}_3$ ):  $\delta$  7.89 (s, 1H), 7.49 (t,  $J = 7.5$  Hz, 2H), 7.41 (t,  $J = 7.4$  Hz, 1H), 7.37 (d,  $J = 7.5$  Hz, 2H), 7.13 (s, 1H), 7.04 (s, 1H), 3.70 (s, 3H), 3.02 – 2.94 (m, 2H), 2.28 (dd,

$J = 12.6, 2.3$  Hz, 2H), 2.02 (s, 3H), 1.88 (ddd,  $J = 21.6, 12.7, 9.0$  Hz, 1H), 1.79 (t,  $J = 11.0$  Hz, 2H), 1.73 – 1.65 (m, 2H), 1.58 – 1.43 (m, 2H), 1.30 (s, 3H), 1.25 (s, 3H).

$^{13}\text{C}$  NMR (125 MHz,  $\text{CDCl}_3$ ):  $\delta$  179.0, 168.3, 146.1, 138.7, 135.6, 131.9, 130.4, 129.3, 129.0, 127.7, 126.0, 122.2, 52.0, 47.6, 44.8, 38.0, 37.0, 36.6, 29.9, 25.1, 24.5, 21.6, 18.5, 16.5.

IR (neat)  $\nu_{\text{max}}$  3021, 2763, 1807, 1719, 1676, 1520, 1199, 908, 721  $\text{cm}^{-1}$ .

HRMS (ESI)  $m/z$ :  $[\text{M} + \text{H}]^+$  calcd. for  $[\text{C}_{26}\text{H}_{29}\text{O}_3\text{N} + \text{H}]^+$  406.2226, found 406.2224.

$[\alpha]_{589}^{25} = +55.30$  ( $c = 0.85$ ,  $\text{CHCl}_3$ ).

#### Synthesis of 2-aryl acetanilide (+)-S4:

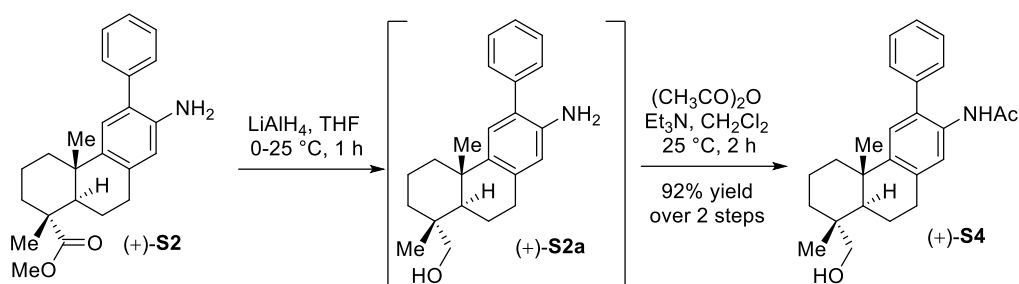

In an oven dried round-bottom flask, compound (+)-S2 (557 mg, 1.53 mmol., 1.0 equiv.) was taken in dry THF (8 mL) and  $\text{LiAlH}_4$  (47 mg, 1.22 mmol., 0.8 equiv.) was added to the reaction mixture portion wise and the reaction mixture at 25 °C was stirring continued until the full consumption of starting material. Upon completion (1 h), as monitored by TLC analysis, it was extracted with EtOAc (8 mL X 2). The organic layers were dried over  $\text{Na}_2\text{SO}_4$  and concentrated in a rotary evaporator under reduced pressure. The crude product (+)-S2a was charged for the next step.

Next, in a round-bottom flask, compound (+)-S2a (1.53 mmol., 1.0 equiv.) was taken in  $\text{CH}_2\text{Cl}_2$  (8 mL) and  $\text{Et}_3\text{N}$  (255  $\mu\text{L}$ , 1.84 mmol., 1.2 equiv.) was added to the reaction mixture. Next, acetic anhydride (184  $\mu\text{L}$ , 1.84 mmol., 1.1 equiv.) was added to the reaction mixture at 25 °C and stirring continued until the full consumption of starting material. Upon completion (2 h),

as monitored by TLC analysis, it was extracted with CH<sub>2</sub>Cl<sub>2</sub> (6 mL X 2). The organic layers were dried over Na<sub>2</sub>SO<sub>4</sub> and concentrated in a rotary evaporator under reduced pressure. The crude product was purified by flash column chromatography with 55% EtOAc in *n*-hexane to afford (+)-**S4** as yellow solid (531 mg, 92% yield over 2 steps).

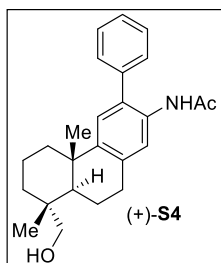

***N*-((4*bS*,8*R*,8*aR*)-8-(hydroxymethyl)-4*b*,8-dimethyl-3-phenyl-4*b*,5,6,7,8,8*a*,9,10-octahydrophenanthren-2-yl)acetamide [(+)-**S4**]**: (+)-**S4** was obtained as yellow solid. M.P. 178-182 °C (1.53 mmol scale of reaction; 531 mg; 92% yield over 2 steps).  $R_f = 0.25$  (50 % EtOAc in *n*-hexane).

**<sup>1</sup>H NMR** (500 MHz, CDCl<sub>3</sub>): δ 7.88 (s, 1H), 7.49 (t,  $J = 7.5$  Hz, 2H), 7.40 (dd,  $J = 23.7, 7.4$  Hz, 3H), 7.14 (s, 1H), 7.07 (s, 1H), 3.51 (d,  $J = 10.9$  Hz, 1H), 3.25 (d,  $J = 10.9$  Hz, 1H), 3.05 – 2.91 (m, 2H), 2.27 (d,  $J = 12.9$  Hz, 1H), 2.03 (s, 3H), 1.84 (td,  $J = 12.1, 10.9, 6.1$  Hz, 2H), 1.79 – 1.74 (m, 2H), 1.48 (td,  $J = 13.0, 4.0$  Hz, 2H), 1.41 (td,  $J = 8.8, 4.1$  Hz, 2H), 1.26 (s, 3H), 0.91 (s, 3H).

**<sup>13</sup>C NMR** (125 MHz, CDCl<sub>3</sub>): δ 168.5, 146.6, 138.8, 135.7, 131.6, 130.3, 129.4, 129.0, 127.6, 126.2, 122.2, 72.1, 43.8, 38.5, 37.9, 37.4, 35.0, 30.0, 29.7, 25.3, 24.5, 18.7, 18.6, 17.4.

**IR** (neat)  $\nu_{\max}$  3307, 3187, 3053, 2869, 1679, 1602, 1587, 1256, 1178, 971 cm<sup>-1</sup>.

**HRMS** (ESI)  $m/z$ : [M+ H]<sup>+</sup> calcd. for [C<sub>25</sub>H<sub>31</sub>O<sub>2</sub>N + H]<sup>+</sup> 378.2433, found 378.2427.

$[\alpha]_{589}^{25} = +67.10$  ( $c = 0.63$ , CHCl<sub>3</sub>).

**Synthesis of compound (+)-**S5**:**

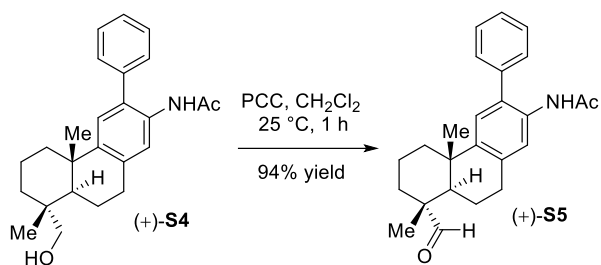

In an oven dried round-bottom flask, compound (+)-**S4** (360 mg, 0.95 mmol., 1.0 equiv.) was taken in  $\text{CH}_2\text{Cl}_2$  (8 mL) and to the reaction mixture PCC (247 mg, 1.14 mmol., 1.2 equiv.) was added. Next, the reaction mixture at 25 °C was stirring continued until the full consumption of starting material. Upon completion (1 h), as monitored by TLC analysis, it was concentrated in a rotary evaporator under reduced pressure. The crude product was purified by flash column chromatography with 30-40% EtOAc in *n*-hexane to afford (+)-**S5** as yellow liquid (335 mg, 94%).

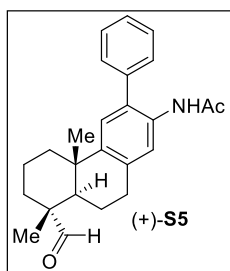

***N*-((4*bS*,8*R*,8*aR*)-8-formyl-4*b*,8-dimethyl-3-phenyl-4*b*,5,6,7,8,8*a*,9,10-**

**octahydrophenanthren-2-yl)acetamide [(+)-**S5**]:** (+)-**S5** was obtained as yellow liquid. (0.95 mmol scale of reaction; 335 mg; 94%).  $R_f = 0.3$  (30 % EtOAc in *n*-hexane).

**$^1\text{H NMR}$**  (500 MHz,  $\text{CDCl}_3$ ):  $\delta$  9.31 (s, 1H), 7.92 (s, 1H), 7.50 (t,  $J = 7.5$  Hz, 2H), 7.43 (d,  $J = 7.5$  Hz, 1H), 7.38 (d,  $J = 7.3$  Hz, 2H), 7.14 (s, 1H), 7.04 (s, 1H), 2.99 (d,  $J = 8.0$  Hz, 2H), 2.33 (d,  $J = 13.0$  Hz, 1H), 2.03 (s, 3H), 1.95 (d,  $J = 12.8$  Hz, 1H), 1.90 – 1.79 (m, 3H), 1.55 – 1.45 (m, 2H), 1.37 (d,  $J = 13.8$  Hz, 2H), 1.27 (s, 3H), 1.19 (s, 3H).

**$^{13}\text{C NMR}$**  (125 MHz,  $\text{CDCl}_3$ ):  $\delta$  206.0, 168.3, 145.3, 138.6, 135.3, 132.1, 130.5, 129.3, 129.0, 127.8, 126.0, 122.3, 49.8, 42.8, 37.9, 36.4, 32.1, 29.6, 25.2, 24.5, 21.2, 17.7, 14.1.

**IR** (neat)  $\nu_{\text{max}}$  3107, 2963, 2829, 1727, 1630, 1435, 1287, 1215, 1109, 820  $\text{cm}^{-1}$ .

**HRMS** (ESI)  $m/z$ :  $[M+H]^+$  calcd. for  $[C_{25}H_{29}O_2N + H]^+$  376.2226, found 376.2271.

$[\alpha]^{25}_{589} = +49.67$  ( $c = 0.51$ ,  $CHCl_3$ ).

### Synthesis of compound (+)-S6:

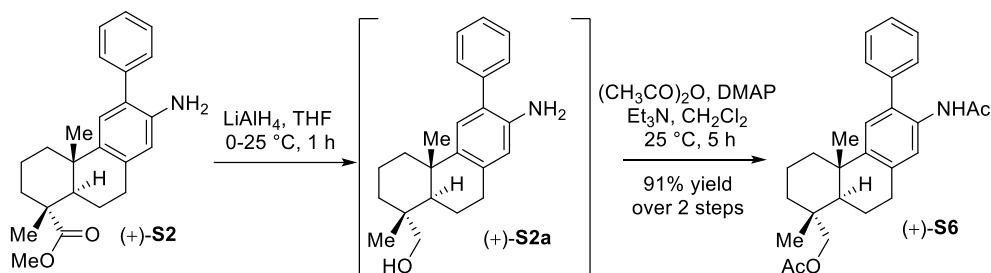

In an oven dried round-bottom flask, compound (+)-S2a (180 mg, 0.49 mmol., 1.0 equiv.) was taken in  $CH_2Cl_2$  (5 mL) and  $Et_3N$  (220  $\mu$ L, 1.58 mmol., 3.2 equiv.) and DMAP (12 mg, 0.1 mmol., 0.2 equiv.) were added to the reaction mixture. Next, acetic anhydride (110  $\mu$ L, 1.08 mmol., 2.2 equiv.) was added to the reaction mixture at 25 °C and stirring continued until the full consumption of starting material. Upon completion (5 h), as monitored by TLC analysis, it was extracted with  $CH_2Cl_2$  (5 mL X 2). The organic layers were dried over  $Na_2SO_4$  and concentrated in a rotary evaporator under reduced pressure. The crude product was purified by flash column chromatography with 40% EtOAc in *n*-hexane to afford (+)-S6 as yellow solid (187 mg, 91% yield over 2 steps).

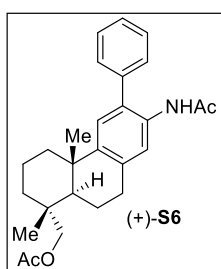

### ((1*R*,4*aS*,10*aR*)-7-Acetamido-1,4*a*-dimethyl-6-phenyl-1,2,3,4,9,10,10*a*-

octahydrophenanthren-1-yl)methyl acetate [(+)-S6]: (+)-S6 was obtained as colorless liquid. (0.49 mmol scale of reaction; 187 mg; 91% yield over 2 steps).  $R_f = 0.28$  (40 % EtOAc in *n*-hexane).

**$^1H$  NMR** (500 MHz,  $CDCl_3$ ):  $\delta$  7.89 (s, 1H), 7.49 (t,  $J = 7.5$  Hz, 2H), 7.42 (t,  $J = 7.2$  Hz, 1H), 7.38 (d,  $J = 7.5$  Hz, 2H), 7.15 (s, 1H), 7.03 (s, 1H), 4.01 (d,  $J = 11.0$  Hz, 1H), 3.73 (d,  $J = 11.1$



Hz, 1H), 3.01 (dd,  $J = 17.5, 6.0$  Hz, 1H), 2.91 (dt,  $J = 17.9, 9.0$  Hz, 1H), 2.27 (d,  $J = 12.9$  Hz, 1H), 2.07 (s, 3H), 2.03 (s, 3H), 1.86 – 1.74 (m, 3H), 1.70 (d,  $J = 13.0$  Hz, 2H), 1.46 (h,  $J = 12.9, 12.2$  Hz, 3H), 1.26 (s, 3H), 0.97 (s, 3H).

$^{13}\text{C}$  NMR (125 MHz,  $\text{CDCl}_3$ ):  $\delta$  171.3, 168.3, 146.4, 138.7, 135.7, 131.8, 130.5, 129.3, 129.0, 127.7, 126.2, 122.3, 72.3, 44.1, 38.4, 37.5, 36.8, 35.5, 30.1, 25.3, 24.5, 21.0, 18.9, 18.5, 17.5.

IR (neat)  $\nu_{\text{max}}$  3390, 2923, 2829, 2655, 1704, 1697, 1565, 1454, 1176, 923, 663  $\text{cm}^{-1}$ .

HRMS (ESI)  $m/z$ :  $[\text{M} + \text{Na}]^+$  calcd. for  $[\text{C}_{27}\text{H}_{33}\text{O}_3\text{N} + \text{Na}]^+$  442.2353, found 442.2357.

$[\alpha]_{589}^{25} = +71.20$  ( $c = 0.67$ ,  $\text{CHCl}_3$ ).

### Synthesis of compound (+)-S7:

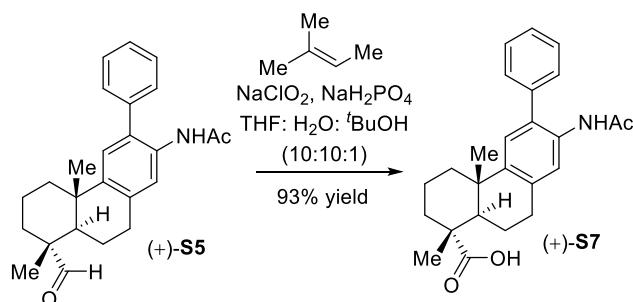

In an oven dried round-bottom flask, compound (+)-S5 (142 mg, 0.38 mmol, 1.0 equiv.) was taken in a mixture of tetrahydrofuran, *tert*-butanol and water [THF:  $\text{H}_2\text{O}$ :  $t\text{BuOH}$  (10:10:1)] at 25 °C and 2-methyl-2-butene (400  $\mu\text{L}$ , 3.80 mmol, 10.0 equiv.) was added to the reaction vessel. After 5 minutes of stirring,  $\text{NaH}_2\text{PO}_4$  (228 mg, 1.90 mmol, 5.0 equiv.) was added to the reaction mixture and it was cooled to 0 °C. Then  $\text{NaClO}_2$  (103 mg, 1.14 mmol, 3.0 equiv.) was added portion wise over a period of 10 minutes. The reaction mixture was allowed to warm to 25 °C and stirring was continued for an additional 2 h. After complete consumption of the starting material (as judged by TLC), it was diluted with water and  $\text{pH} < 3$  was maintained by addition of 2(N) HCl. Next, mixture was extracted with EtOAc (15 mL X 3) and organic layer was dried over  $\text{Na}_2\text{SO}_4$  and concentrated in a rotary evaporator under vacuum. The crude product was purified by flash column chromatography with 50-60% EtOAc in *n*-hexane to afford (+)-S7 as white foam (138 mg, 93%).

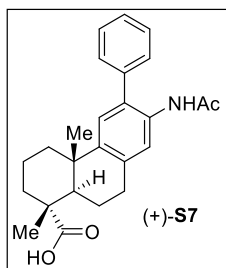

**(1*R*,4*aS*,10*aR*)-7-Acetamido-1,4*a*-dimethyl-6-phenyl-1,2,3,4,4*a*,9,10,10*a*-**

**octahydrophenanthrene-1-carboxylic acid [(+)-S7]:** (+)-S7 was obtained as white foam (0.38 mmol scale of reaction; 138 mg; 93%).  $R_f = 0.2$  (50 % EtOAc in *n*-hexane).

**$^1\text{H NMR}$**  (500 MHz,  $\text{CDCl}_3$ ):  $\delta$  7.89 (s, 1H), 7.48 (d,  $J = 7.6$  Hz, 2H), 7.40 (dd,  $J = 23.1, 7.5$  Hz, 3H), 7.13 (s, 1H), 7.05 (s, 1H), 3.01 (dd,  $J = 9.7, 5.5$  Hz, 2H), 2.29 (d,  $J = 12.5$  Hz, 2H), 2.03 (s, 3H), 1.92 (q,  $J = 11.2$  Hz, 1H), 1.83 (t,  $J = 11.4$  Hz, 2H), 1.74 (d,  $J = 10.1$  Hz, 2H), 1.65 – 1.51 (m, 2H), 1.32 (s, 3H), 1.26 (s, 3H).

**$^{13}\text{C NMR}$**  (125 MHz,  $\text{CDCl}_3$ ):  $\delta$  184.1, 168.4, 146.0, 138.7, 135.6, 131.8, 130.4, 129.3, 129.0, 127.7, 126.0, 122.3, 47.4, 44.6, 38.0, 37.0, 36.7, 29.9, 25.1, 24.5, 21.6, 18.5, 16.3.

**IR** (neat)  $\nu_{\text{max}}$  3421, 2873, 2702, 1700, 1643, 1475, 1349, 923, 631  $\text{cm}^{-1}$ .

**HRMS** (ESI)  $m/z$ :  $[\text{M} + \text{H}]^+$  calcd. for  $[\text{C}_{25}\text{H}_{29}\text{O}_3\text{N} + \text{H}]^+$  392.2226, found 392.2238.

$[\alpha]_{589}^{25} = +37.90$  ( $c = 0.37$ ,  $\text{CH}_3\text{OH}$ ).

**Synthesis of compound (+)-S8:**

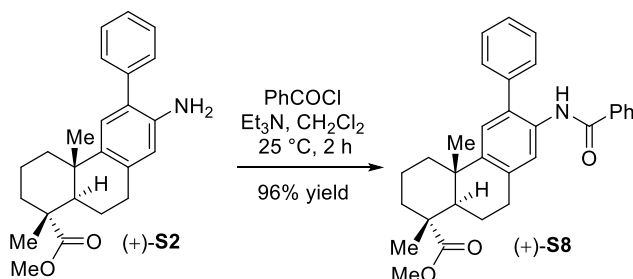

In an oven dried round-bottom flask, compound (+)-S2 (103 mg, 0.28 mmol., 1.0 equiv.) was taken in  $\text{CH}_2\text{Cl}_2$  (5 mL) and  $\text{Et}_3\text{N}$  (47  $\mu\text{L}$ , 0.34 mmol., 1.2 equiv.) was added to the reaction mixture. Next,  $\text{PhCOCl}$  (36  $\mu\text{L}$ , 0.31 mmol., 1.1 equiv.) was added to the reaction mixture at

25 °C and stirring continued until the full consumption of starting material. Upon completion (2 h), as monitored by TLC analysis, it was extracted with CH<sub>2</sub>Cl<sub>2</sub> (5 mL X 2). The organic layers were dried over Na<sub>2</sub>SO<sub>4</sub> and concentrated in a rotary evaporator under reduced pressure. The crude product was purified by flash column chromatography with 15% EtOAc in *n*-hexane to afford (+)-**S8** as white solid (126 mg, 96% yield).

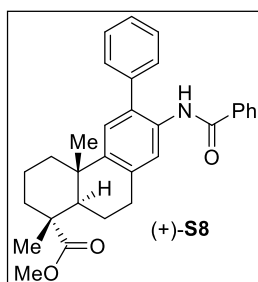

**Methyl (1*R*,4*aS*,10*aR*)-7-benzamido-1,4*a*-dimethyl-6-phenyl-1,2,3,4,4*a*,9,10,10*a*-octahydrophenanthrene-1-carboxylate [(+)-**S8**]:** (+)-**S8** was obtained as white solid. MP = 130 - 134 °C (0.28 mmol scale of reaction; 126 mg; 96%). *R<sub>f</sub>* = 0.2 (10 % EtOAc in *n*-hexane).

**<sup>1</sup>H NMR** (500 MHz, CDCl<sub>3</sub>): δ 8.21 (s, 1H), 7.92 (s, 1H), 7.62 (d, *J* = 7.7 Hz, 2H), 7.46 (tt, *J* = 28.0, 7.8 Hz, 8H), 7.19 (s, 1H), 3.71 (d, *J* = 2.7 Hz, 3H), 3.04 (d, *J* = 8.3 Hz, 2H), 2.31 (d, *J* = 12.5 Hz, 2H), 1.92 (q, *J* = 11.3 Hz, 1H), 1.82 (d, *J* = 9.9 Hz, 2H), 1.71 (dd, *J* = 21.6, 7.8 Hz, 2H), 1.57 (t, *J* = 12.2 Hz, 1H), 1.49 (d, *J* = 13.2 Hz, 1H), 1.32 (s, 3H), 1.28 (s, 3H).

**<sup>13</sup>C NMR** (125 MHz, CDCl<sub>3</sub>): δ 179.0, 164.9, 146.0, 138.6, 135.8, 134.9, 132.1, 131.6, 130.4, 129.5, 129.1, 128.7, 128.5, 127.9, 126.8, 125.9, 121.5, 52.0, 47.7, 44.9, 38.0, 37.1, 36.7, 30.0, 25.1, 21.6, 18.5, 16.5.

**IR** (neat) *ν*<sub>max</sub> 3066, 3015, 2867, 2834, 1785, 1707, 1623, 1447, 1209, 1087, 836 cm<sup>-1</sup>.

**HRMS** (ESI) *m/z*: [M+ H]<sup>+</sup> calcd. for [C<sub>31</sub>H<sub>33</sub>O<sub>3</sub>N + H]<sup>+</sup> 468.2539, found 468.2529.

[α]<sub>589</sub><sup>25</sup> = +44.70 (*c* = 0.52, CHCl<sub>3</sub>).

**Synthesis of compound (+)-**S10**, (+)-**S11**, and (+)-**S12**:**

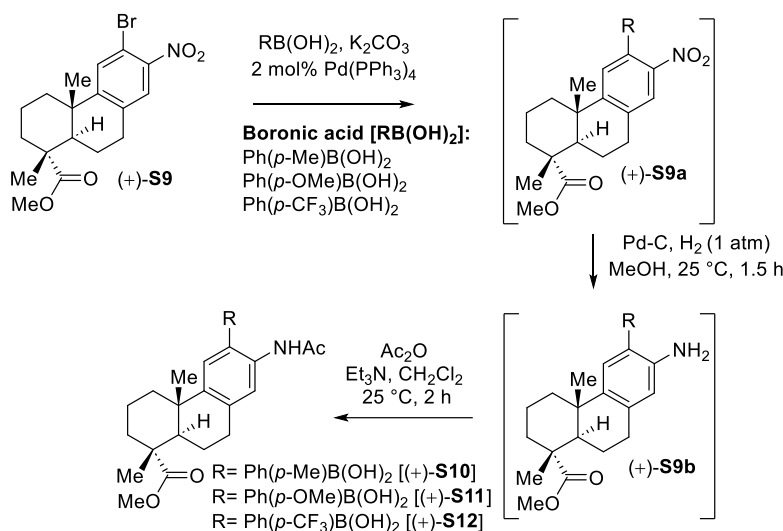

### General Procedure:

A round-bottom flask was charged with (+)-**S9** (1.0 equiv.) and functionalized benzene boronic acid (1.2 equiv.) in a mixture of benzene (9 mL), EtOH (3 mL), and water (3 mL) at room temperature under argon atmosphere. Next, potassium carbonate (2.0 equiv.) was added to the reaction mixture followed by the addition of catalyst, tetrakis(triphenylphosphine)palladium(0) (0.02 equiv.) at the same temperature. Then the reaction mixture was placed on a pre-heated oil bath maintaining temperature of 80 °C. Upon completion of the reaction (~10 h), as monitored by TLC analysis, it was extracted with EtOAc. The combined organic layers were washed with brine and dried over  $\text{Na}_2\text{SO}_4$  and concentrated in a rotary evaporator under reduced pressure. The crude product was purified by flash chromatography.

Next, in round-bottom flask compound (+)-**S9a** (1.0 equiv.) was taken in MeOH and degassed with  $\text{N}_2$  balloon for 10 minutes. To this solution Pd/C (10% w/w) was added and a  $\text{H}_2$  gas balloon (1 atm.) was placed with the reaction vessel and stirring continued until the full consumption of starting material (1.5 h), as confirmed by TLC analysis. The reaction mixture was filtered, evaporated to dryness under the reduced pressure. The crude product was purified by flash column chromatography with 20% EtOAc in *n*-hexane to afford corresponding (+)-**S9b**.

After that, in a round-bottom flask, compound (+)-**S9b** (1.0 equiv.) was taken in  $\text{CH}_2\text{Cl}_2$  and  $\text{Et}_3\text{N}$  (1.2 equiv.) was added to the reaction mixture. Next, acetic anhydride (1.1 equiv.) was added to the reaction mixture at 25 °C and stirring continued until the full consumption of

starting material. Upon completion (2 h), as monitored by TLC analysis, it was extracted with  $\text{CH}_2\text{Cl}_2$ . The organic layers were dried over  $\text{Na}_2\text{SO}_4$  and concentrated in a rotary evaporator under reduced pressure. The crude product was purified by flash column chromatography with EtOAc in *n*-hexane to afford corresponding products. For characterization of compound (+)-**S9** see ref. 1.

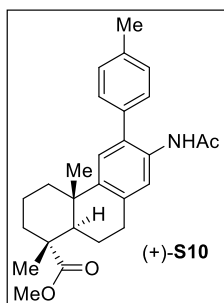

**Methyl (1*R*,4*aS*,10*aR*)-7-acetamido-1,4*a*-dimethyl-6-(*p*-tolyl)-1,2,3,4,4*a*,9,10,10*a*-octahydrophenanthrene-1-carboxylate [(+)-**S10**]:** (+)-**S10** was obtained as white foam (0.373 mmol scale of reaction; 141 mg; 90% over 3 steps).  $R_f = 0.2$  (40 % EtOAc in *n*-hexane).

**$^1\text{H NMR}$**  (500 MHz,  $\text{CDCl}_3$ ):  $\delta$  7.90 (s, 1H), 7.32 – 7.25 (m, 4H), 7.11 (s, 1H), 7.07 (s, 1H), 3.70 (s, 3H), 2.97 (dd,  $J = 9.8, 5.0$  Hz, 2H), 2.44 (s, 3H), 2.27 (dd,  $J = 12.5, 2.2$  Hz, 2H), 2.03 (s, 3H), 1.88 (td,  $J = 12.9, 6.4$  Hz, 1H), 1.79 (d,  $J = 10.2$  Hz, 1H), 1.70 (dt,  $J = 26.3, 10.7$  Hz, 3H), 1.52 (dd,  $J = 13.9, 10.1$  Hz, 1H), 1.48 – 1.42 (m, 1H), 1.30 (s, 3H), 1.24 (s, 3H).

**$^{13}\text{C NMR}$**  (125 MHz,  $\text{CDCl}_3$ ):  $\delta$  179.0, 168.2, 145.9, 137.5, 135.7, 135.4, 132.0, 130.2, 129.7, 129.2, 126.0, 122.0, 52.0, 47.6, 44.8, 38.0, 37.0, 36.6, 29.9, 25.1, 24.5, 21.6, 21.2, 18.5, 16.5.

**IR** (neat)  $\nu_{\text{max}}$  2988, 2821, 1798, 1702, 1627, 1573, 1465, 1086, 746  $\text{cm}^{-1}$ .

**HRMS** (ESI)  $m/z$ :  $[\text{M} + \text{H}]^+$  calcd. for  $[\text{C}_{27}\text{H}_{33}\text{O}_3\text{N} + \text{H}]^+$  420.2533, found 420.2535.

$[\alpha]_{589}^{25} = +59.32$  ( $c = 0.7$ ,  $\text{CHCl}_3$ ).

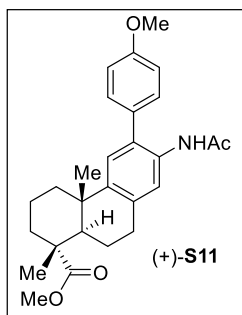

**Methyl** (1*R*,4*aS*,10*aR*)-7-acetamido-6-(4-methoxyphenyl)-1,4*a*-dimethyl-1,2,3,4,4*a*,9,10,10*a*-octahydrophenanthrene-1-carboxylate [(+)-S11]: (+)-S11 was obtained as colourless liquid. (0.383 mmol scale of reaction; 135 mg; 81% over 3 steps).  $R_f = 0.23$  (30 % EtOAc in *n*-hexane).

**$^1\text{H NMR}$**  (400 MHz,  $\text{CDCl}_3$ ):  $\delta$  7.85 (s, 1H), 7.26 (d,  $J = 2.1$  Hz, 1H), 7.25 – 7.24 (m, 1H), 7.06 (s, 1H), 6.98 (d,  $J = 8.7$  Hz, 3H), 3.85 (s, 3H), 3.66 (s, 3H), 2.93 (dd,  $J = 7.9, 3.4$  Hz, 2H), 2.23 (dd,  $J = 12.5, 2.3$  Hz, 2H), 2.00 (s, 3H), 1.87 – 1.80 (m, 1H), 1.76 (d,  $J = 9.7$  Hz, 1H), 1.72 – 1.64 (m, 2H), 1.62 – 1.61 (m, 1H), 1.50 (dd,  $J = 12.7, 3.7$  Hz, 1H), 1.42 (q,  $J = 5.4, 4.2$  Hz, 1H), 1.26 (s, 3H), 1.20 (s, 3H)

**$^{13}\text{C NMR}$**  (126 MHz,  $\text{CDCl}_3$ ):  $\delta$  179.0, 168.2, 159.2, 145.9, 135.3, 132.1, 130.8, 130.5, 130.0, 126.0, 122.0, 114.4, 55.4, 52.0, 47.6, 44.8, 38.0, 37.0, 36.6, 29.8, 25.1, 24.5, 21.6, 18.5, 16.5.

**IR** (neat)  $\nu_{\text{max}}$  3007, 2865, 2743, 1821, 1699, 1580, 1289, 1067, 782  $\text{cm}^{-1}$ .

**HRMS** (ESI)  $m/z$ :  $[\text{M} + \text{Na}]^+$  calcd. for  $[\text{C}_{27}\text{H}_{33}\text{O}_4\text{N} + \text{Na}]^+$  458.2302, found 458.2315.

$[\alpha]_{589}^{25} = +53.37$  ( $c = 0.35$ ,  $\text{CHCl}_3$ ).

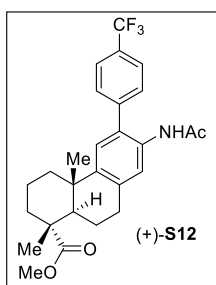

**Methyl** (1*R*,4*aS*,10*aR*)-7-acetamido-1,4*a*-dimethyl-6-(4-(trifluoromethyl)phenyl)-1,2,3,4,4*a*,9,10,10*a*-octahydrophenanthrene-1-carboxylate [(+)-S12]: (+)-S12 was obtained

as white foam. (0.356 mmol scale of reaction; 145 mg; 86% over 3 steps).  $R_f = 0.3$  (30 % EtOAc in *n*-hexane).

$^1\text{H NMR}$  (500 MHz,  $\text{CDCl}_3$ ):  $\delta$  7.77 (s, 1H), 7.73 (d,  $J = 7.9$  Hz, 2H), 7.50 (d,  $J = 7.9$  Hz, 2H), 7.12 (s, 1H), 6.89 (s, 1H), 3.70 (s, 3H), 3.02 – 2.94 (m, 2H), 2.27 (dt,  $J = 12.6, 2.7$  Hz, 2H), 2.04 (s, 3H), 1.93 – 1.82 (m, 1H), 1.81 – 1.75 (m, 2H), 1.68 (d,  $J = 7.3$  Hz, 2H), 1.56 – 1.42 (m, 2H), 1.30 (s, 3H), 1.24 (s, 3H).

$^{13}\text{C NMR}$  (125 MHz,  $\text{CDCl}_3$ ):  $\delta$  178.9, 168.5, 146.8, 142.7, 136.5, 131.5, 129.8, 129.7, 126.0, 125.8, 123.6, 52.0, 47.6, 44.7, 38.0, 37.1, 36.6, 29.8, 25.1, 24.3, 21.5, 18.5, 16.5.

$^{19}\text{F NMR}$  (376 MHz,  $\text{CDCl}_3$ )  $\delta$  -62.43.

**IR** (neat)  $\nu_{\text{max}}$  3035, 2994, 2873, 2834, 1715, 1683, 1457, 1326, 1188, 857, 683  $\text{cm}^{-1}$ .

**HRMS** (ESI)  $m/z$ :  $[\text{M} + \text{Na}]^+$  calcd. for  $[\text{C}_{27}\text{H}_{30}\text{F}_3\text{O}_3\text{N} + \text{Na}]^+$  496.2076, found 496.2085.

$[\alpha]_{\text{D}}^{25} = +68.90$  ( $c = 0.57$ ,  $\text{CHCl}_3$ ).

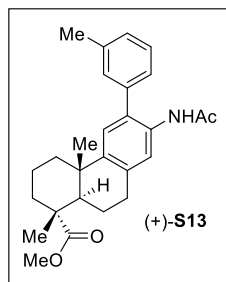

**Methyl (1R,4aS,10aR)-7-acetamido-1,4a-dimethyl-6-(*m*-tolyl)-1,2,3,4,4a,9,10,10a-octahydrophenanthrene-1-carboxylate [(+)-S13]**: (+)-S13 was obtained as colourless liquid. (0.400 mmol scale of reaction; 136 mg; 74% over 3 steps).  $R_f = 0.23$  (30 % EtOAc in *n*-hexane).

$^1\text{H NMR}$  (400 MHz,  $\text{CDCl}_3$ ):  $\delta$  7.87 (s, 1H), 7.32 (d,  $J = 7.9$  Hz, 1H), 7.19 (d,  $J = 7.7$  Hz, 1H), 7.14 – 7.12 (m, 2H), 7.08 (s, 1H), 7.04 – 7.02 (m, 1H), 3.66 (s, 3H), 2.93 (dd,  $J = 6.8, 3.3$  Hz, 2H), 2.40 (s, 3H), 2.23 (s, 1H), 1.99 (s, 3H), 1.80 (s, 2H), 1.79 – 1.73 (m, 3H), 1.68 (s, 2H), 1.63 (s, 1H), 1.26 (s, 3H), 1.21 (s, 3H).

$^{13}\text{C}$  NMR (101 MHz,  $\text{CDCl}_3$ ):  $\delta$  179.1, 168.3, 138.9, 138.7, 135.5, 132.0, 130.4, 130.2, 128.9, 128.5, 126.3, 126.0, 122.0, 60.5, 52.1, 47.7, 44.9, 38.1, 37.1, 36.7, 29.9, 25.2, 24.6, 21.7, 21.6, 21.1, 18.6, 16.6, 14.3.

IR (neat)  $\nu_{\text{max}}$  3007, 2865, 2743, 1821, 1699, 1580, 1289, 1067, 782  $\text{cm}^{-1}$ .

$[\alpha]_{589}^{25} = +57.22$  ( $c = 0.35$ ,  $\text{CHCl}_3$ ).

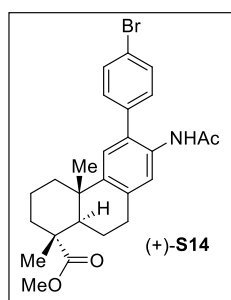

**Methyl (1*R*,4*aS*,10*aR*)-7-acetamido-6-(4-bromophenyl)-1,4*a*-dimethyl-1,2,3,4,4*a*,9,10,10*a*-octahydrophenanthrene-1-carboxylate [(+)-S14]:** (+)-S14 was obtained as colourless liquid. (0.450 mmol scale of reaction; 161 mg; 74% over 3 steps).  $R_f = 0.22$  (30 % EtOAc in *n*-hexane).

$^1\text{H}$  NMR (400 MHz,  $\text{CDCl}_3$ )  $\delta$  7.77 (s, 1H), 7.59 – 7.56 (m, 2H), 7.21 (d,  $J = 8.4$  Hz, 2H), 7.05 (s, 1H), 6.85 (s, 1H), 3.66 (s, 3H), 2.95 – 2.92 (m, 2H), 2.22 (dd,  $J = 12.5, 2.3$  Hz, 2H), 2.01 (s, 3H), 1.89 – 1.77 (m, 2H), 1.76 – 1.71 (m, 2H), 1.70 – 1.62 (m, 3H), 1.53 – 1.44 (m, 2H), 1.41 (s, 1H), 1.26 (s, 3H), 1.20 (s, 3H).

$^{13}\text{C}$  NMR (126 MHz,  $\text{CDCl}_3$ )  $\delta$  179.0, 168.3, 137.7, 136.1, 132.1, 131.7, 131.0, 129.6, 125.8, 123.0, 121.9, 52.0, 47.6, 44.7, 38.0, 37.1, 36.6, 29.8, 25.1, 24.4, 21.5, 18.5, 16.5.

IR (neat)  $\nu_{\text{max}}$  3007, 2865, 2743, 1821, 1699, 1580, 1289, 1067, 782  $\text{cm}^{-1}$ .

HRMS (ESI)  $m/z$ :  $[\text{M} + \text{H}]^+$  calcd. for  $[\text{C}_{26}\text{H}_{31}\text{BrNO}_3 + \text{H}]^+$  484.1487, found 484.1475.

$[\alpha]_{589}^{25} = +58.41$  ( $c = 0.35$ ,  $\text{CHCl}_3$ ).



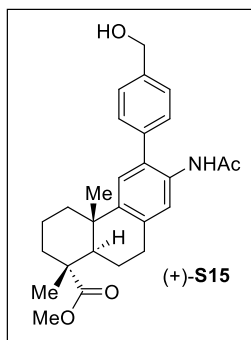

**Methyl (1R,4aS,10aR)-7-acetamido-6-(4-(hydroxymethyl)phenyl)-1,4a-dimethyl-1,2,3,4,4a,9,10,10a-octahydrophenanthrene-1-carboxylate [(+)-S15]:** (+)-S15 was obtained as yellow liquid. (0.450 mmol scale of reaction; 153 mg; 78% over 3 steps).  $R_f = 0.31$  (70 % EtOAc in *n*-hexane).

**$^1\text{H NMR}$**  (400 MHz,  $\text{CDCl}_3$ ):  $\delta$  7.81 (s, 1H), 7.44 (d,  $J = 8.0$  Hz, 2H), 7.32 (d,  $J = 8.0$  Hz, 2H), 7.08 (s, 1H), 7.05 (s, 1H), 4.73 (s, 2H), 3.65 (s, 3H), 2.95 – 2.91 (m, 2H), 2.23 (dd,  $J = 12.6$ , 2.2 Hz, 2H), 2.03 (d,  $J = 8.6$  Hz, 1H), 1.98 (s, 3H), 1.87 – 1.80 (m, 2H), 1.75 (d,  $J = 10.0$  Hz, 2H), 1.72 – 1.66 (m, 2H), 1.26 (s, 3H), 1.20 (s, 3H).

**$^{13}\text{C NMR}$**  (101 MHz,  $\text{CDCl}_3$ ):  $\delta$  179.2, 168.6, 146.3, 140.5, 138.1, 135.7, 131.9, 130.4, 129.5, 127.7, 126.1, 122.6, 64.9, 52.1, 47.7, 44.9, 38.1, 37.1, 36.7, 29.9, 29.8, 25.2, 24.5, 18.6, 16.6.

**IR** (neat)  $\nu_{\text{max}}$  3007, 2865, 2743, 1821, 1870, 1699, 1580, 1289, 1067, 782  $\text{cm}^{-1}$ .

$[\alpha]_{589}^{25} = +67.59$  ( $c = 0.45$ ,  $\text{CHCl}_3$ ).

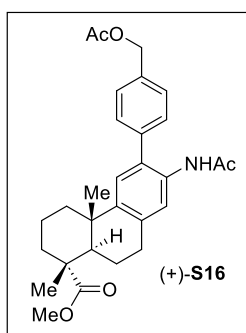

**Methyl (1R,4aS,10aR)-7-acetamido-6-(4-(acetoxymethyl)phenyl)-1,4a-dimethyl-1,2,3,4,4a,9,10,10a-octahydrophenanthrene-1-carboxylate [(+)-S16]:** (+)-S16 was obtained

as yellow liquid. (0.450 mmol scale of reaction; 153 mg; 64% over 3 steps).  $R_f = 0.31$  (70 % EtOAc in *n*-hexane).

$^1\text{H NMR}$  (400 MHz,  $\text{CDCl}_3$ ):  $\delta$  7.82 (s, 1H), 7.44 (d,  $J = 8.0$  Hz, 2H), 7.34 (d,  $J = 8.0$  Hz, 2H), 7.07 (s, 1H), 6.99 – 6.96 (m, 1H), 5.15 (s, 2H), 3.66 (s, 3H), 2.94 (dd,  $J = 8.5, 4.1$  Hz, 2H), 2.23 (dd,  $J = 12.5, 2.3$  Hz, 2H), 2.13 (s, 3H), 2.00 (s, 3H), 1.85 – 1.79 (m, 1H), 1.76 (d,  $J = 9.9$  Hz, 1H), 1.70 (d,  $J = 14.7$  Hz, 2H), 1.64 (s, 1H), 1.52 – 1.43 (m, 2H), 1.26 (s, 3H), 1.20 (s, 3H).

$^{13}\text{C NMR}$  (126 MHz,  $\text{CDCl}_3$ ):  $\delta$  179.0, 170.9, 168.3, 146.2, 138.8, 135.8, 135.5, 131.8, 130.0, 129.5, 128.8, 126.0, 122.6, 65.9, 52.0, 47.6, 44.8, 38.0, 37.0, 36.6, 29.8, 25.1, 24.5, 21.6, 21.0, 18.5, 16.5.

**IR** (neat)  $\nu_{\text{max}}$  3012, 2814, 2748, 1824, 1845, 1644, 1536, 1278, 1065, 789  $\text{cm}^{-1}$ .

$[\alpha]_{589}^{25} = +58.50$  ( $c = 0.3$ ,  $\text{CHCl}_3$ ).

#### Synthesis of triflate derivative **S17**:

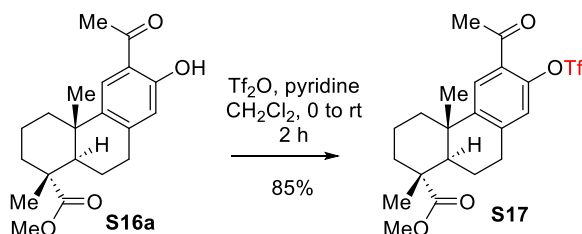

To a stirred solution of *ortho*-hydroxy acetophenone **S16a** (300 mg, 0.908 mmol, 1.0 equiv.) in  $\text{CH}_2\text{Cl}_2$  (10 mL) at 0 °C was added pyridine (0.01 mL, 2.02 mmol, 1.5 equiv.) and trifluoromethanesulfonic anhydride (0.08 mL, 1.8 mmol, 1.2 equiv.) consecutively dropwise over 5 min. Then the reaction was allowed to run at room temperature. After 6 h the reaction was quenched with water, extracted into  $\text{CH}_2\text{Cl}_2$  (15 mL X 3) and the organic phase washed with 1 M hydrochloric acid (10 mL), water (5 mL) and brine (5 mL). The organic phase was dried over anhydrous sodium sulfate, filtered and the solvent removed *in vacuo* and the crude product was purified by silica gel chromatography with 20% EtOAc in *n*-hexane to afford the product **S17** as yellow liquid (250 mg, 85%).

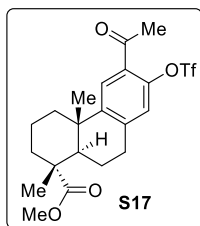

**(1R,4aS,10aR)- methyl 6-acetyl-1,4a-dimethyl-7-(((trifluoromethyl)sulfonyl)oxy)-1,2,3,4,4a,9,10,10a-octahydrophenanthrene-1-carboxylate [S17]:** S17 was obtained as yellow liquid (0.90 mmol scale of reaction; 85% yield).  $R_f = 0.25$  (10% EtOAc in n-hexane).

**$^1\text{H}$  NMR** (500 MHz,  $\text{CDCl}_3$ ):  $\delta$  7.68 (s, 1H), 6.95 (s, 1H), 3.67 (s, 3H), 2.96 – 2.91 (m, 2H), 2.59 (s, 3H), 2.33 (d,  $J = 12.5$  Hz, 1H), 2.20 – 2.15 (m, 1H), 1.85 – 1.80 (m, 1H), 1.79 – 1.73 (m, 3H), 1.69 (d,  $J = 3.5$  Hz, 1H), 1.50 (q,  $J = 2.8, 2.4$  Hz, 2H), 1.27 (s, 3H), 1.21 (d,  $J = 0.8$  Hz, 3H).

**$^{13}\text{C}$  NMR** (125 MHz,  $\text{CDCl}_3$ ):  $\delta$  196.5, 178.6, 150.1, 144.5, 142.7, 129.4, 127.4, 122.6, 117.3, 52.1, 47.4, 44.2, 37.8, 37.4, 36.5, 29.9, 25.0, 20.1, 18.3, 16.5.

IR (neat)  $\nu_{\text{max}}$  2958, 2848, 2369, 1710, 1489, 1234, 1112, 965, 786, 720  $\text{cm}^{-1}$ .

**HRMS** (ESI)  $m/z$ :  $[\text{M} + \text{H}]^+$  calcd. for  $[\text{C}_{21}\text{H}_{25}\text{F}_3\text{O}_6\text{S} + \text{Na}]^+$  485.1222, found 485.1220.

$[\alpha]^{25}_{589} = +46.5$  ( $c = 0.5$ ,  $\text{CHCl}_3$ ).

### Synthesis of biaryl derivative S18:

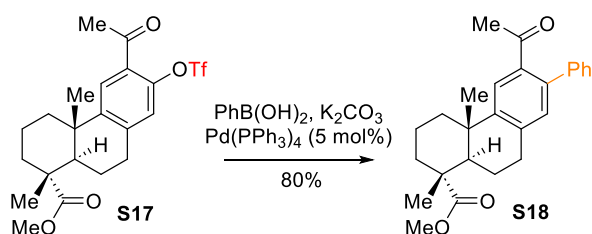

A sealed tube or a round-bottom flask equipped with reflux condenser with  $\text{N}_2$  atmosphere was charged with  $\text{K}_2\text{CO}_3$  (50 mg, 0.17 mmol, 2.0 equiv.), Phenylboronic acid (70 mg, 0.35 mmol, 1.2 equiv.), compound S17 (80 mg, 0.17 mmol, 1.0 equiv.) and  $\text{Pd}(\text{PPh}_3)_4$  (10 mg, 0.01 mmol,

0.05 equiv.), using a mixture of Benzene (5 mL), EtOH (2 mL) in H<sub>2</sub>O (2 mL). The reaction mixture was heated at 90 °C (oil bath) with stirring for 8 h. The resulting mixture was diluted with H<sub>2</sub>O (2 mL) and extracted with EtOAc (3 × 7 mL). The organic layer was dried (Na<sub>2</sub>SO<sub>4</sub>) and then filtered. The solvent was removed in vacuo, and the crude product was purified by silica gel chromatography with 20% EtOAc in *n*-hexane to afford the product **S18** as yellow foam (60 mg, 78%).

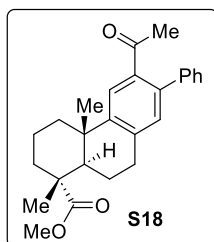

(1*R*,4*aS*,10*aR*)-Methyl -6-acetyl-1,4*a*-dimethyl-7-phenyl-1,2,3,4,4*a*,9,10,10*a*-octahydrophenanthrene-1-carboxylate [**S16**]: **S16** was obtained as yellow foam (0.17 mmol scale of reaction; 78% yield).  $R_f = 0.35$  (10% EtOAc in *n*-hexane).

<sup>1</sup>H NMR (500 MHz, CDCl<sub>3</sub>): δ 8.11 (d,  $J = 1.9$  Hz, 1H), 8.02 (d,  $J = 8.0$  Hz, 1H), 7.72 (d,  $J = 11.4$  Hz, 1H), 7.61 (dd,  $J = 7.5, 1.9$  Hz, 1H), 7.45 (t,  $J = 7.9$  Hz, 2H), 6.99 (s, 1H), 3.71 (s, 3H), 2.97 (dd,  $J = 8.8, 4.7$  Hz, 2H), 2.63 (s, 3H), 2.36 (d,  $J = 13.1$  Hz, 1H), 2.21 (dd,  $J = 12.5, 2.2$  Hz, 1H), 1.87 (ddd,  $J = 13.1, 9.1, 3.9$  Hz, 2H), 1.79 (d,  $J = 8.5$  Hz, 2H), 1.74 – 1.71 (m, 1H), 1.57 – 1.50 (m, 2H), 1.31 (s, 3H), 1.25 (s, 3H).

<sup>13</sup>C NMR (126 MHz, CDCl<sub>3</sub>): δ 204.7, 179.0, 167.7, 148.9, 140.9, 138.6, 138.5, 138.0, 131.0, 130.9, 128.8, 128.6, 127.6, 124.5, 61.6, 52.0, 47.6, 44.7, 37.9, 37.2, 36.7, 30.5, 29.8, 25.0, 21.4, 18.4, 16.5, 14.1.

IR (neat)  $\nu_{\max}$  2958, 2848, 2369, 1710, 1489, 1234, 1112, 965, 786, 720 cm<sup>-1</sup>.

$[\alpha]_{589}^{25} = +46.5$  ( $c = 0.5$ , CHCl<sub>3</sub>).

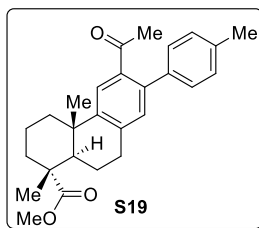

(1*R*,4*aS*,10*aR*)- **Methyl 6-acetyl-1,4a-dimethyl-7-(*p*-tolyl)-1,2,3,4,4a,9,10,10a-octahydrophenanthrene-1-carboxylate: S19** was obtained as yellow foam (0.20 mmol scale of reaction; 78% yield).  $R_f = 0.40$  (10% EtOAc in *n*-hexane).

$^1\text{H NMR}$  (500 MHz,  $\text{CDCl}_3$ ):  $\delta$  7.45 (s, 1H), 7.19 (s, 4H), 7.02 (s, 1H), 3.66 (s, 3H), 2.96 – 2.91 (m, 2H), 2.38 (s, 4H), 2.26 – 2.21 (m, 1H), 1.96 (s, 3H), 1.91 – 1.82 (m, 1H), 1.79 – 1.75 (m, 2H), 1.72 (d,  $J = 3.1$  Hz, 1H), 1.66 (d,  $J = 6.2$  Hz, 1H), 1.55 (d,  $J = 12.8$  Hz, 1H), 1.45 (dtd,  $J = 13.2, 4.8, 2.2$  Hz, 1H), 1.28 (s, 3H), 1.25 (d,  $J = 0.7$  Hz, 3H).

$^{13}\text{C NMR}$  (125 MHz,  $\text{CDCl}_3$ ):  $\delta$  196.5, 178.6, 150.1, 144.5, 142.7, 129.4, 127.4, 122.6, 117.3, 52.1, 47.4, 44.2, 37.8, 37.4, 36.5, 29.9, 29.5, 25., 20.9, 18.3, 16.5.

IR (neat)  $\nu_{\text{max}}$  2958, 2848, 2369, 1710, 1489, 1234, 1112, 965, 786, 720  $\text{cm}^{-1}$ .

**HRMS** (ESI)  $m/z$ :  $[\text{M} + \text{H}]^+$  calcd. for  $[\text{C}_{27}\text{H}_{32}\text{O}_3 + \text{H}]^+$  405.2430, found 405.2426.

$[\alpha]_{589}^{25} = +63.5$  ( $c = 0.5$ ,  $\text{CHCl}_3$ ).

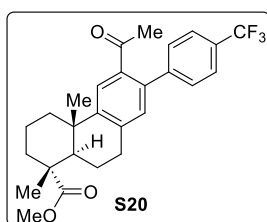

(1*R*,4*aS*,10*aR*)- **Methyl 6-acetyl-1,4a-dimethyl-7-(4-(trifluoromethyl)phenyl)-1,2,3,4,4a,9,10,10a-octahydrophenanthrene-1-carboxylate: S20** was obtained as yellow foam (0.25 mmol scale of reaction; 80% yield).  $R_f = 0.35$  (10% EtOAc in *n*-hexane).

$^1\text{H NMR}$  (500 MHz,  $\text{CDCl}_3$ ):  $\delta$  7.65 – 7.62 (m, 2H), 7.52 (s, 1H), 7.42 – 7.39 (m, 2H), 7.00 (s, 1H), 3.67 (s, 3H), 2.97 – 2.93 (m, 2H), 2.38 (d,  $J = 12.5$  Hz, 1H), 2.26 – 2.22 (m, 1H), 2.07 (s,

3H), 1.86 (s, 1H), 1.84 – 1.79 (m, 2H), 1.76 (s, 2H), 1.74 (s, 1H), 1.69 (d,  $J = 3.7$  Hz, 1H), 1.29 (s, 3H), 1.26 – 1.25 (m, 3H)..

$^{13}\text{C}$  NMR (125 MHz,  $\text{CDCl}_3$ ):  $\delta$  178.9, 149.7, 144.8, 139, 131.2, 129.1, 125.4, 124.9, 77.2, 52, 47.6, 44.6, 37.9, 37.3, 36.6, 30.4, 29.8, 29.7, 25, 21.3, 18.4, 16.5.

$^{19}\text{F}$  NMR (471 MHz,  $\text{CDCl}_3$ )  $\delta$  -62.44

IR (neat)  $\nu_{\text{max}}$  2958, 2848, 2369, 1710, 1489, 1234, 1112, 965, 786, 720  $\text{cm}^{-1}$ .

HRMS (ESI)  $m/z$ :  $[\text{M} + \text{H}]^+$  calcd. for  $[\text{C}_{27}\text{H}_{30}\text{F}_3\text{O}_3 + \text{H}]^+$  459.2147, found 459.2140.

$[\alpha]^{25}_{589} = +60.5$  ( $c = 0.5$ ,  $\text{CHCl}_3$ ).

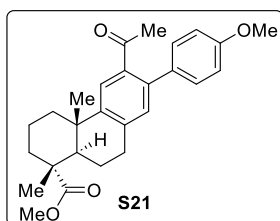

(1*R*,4*aS*,10*aR*)- Methyl 6-acetyl-7-(4-methoxyphenyl)-1,4*a*-dimethyl-1,2,3,4,4*a*,9,10,10*a*-octahydrophenanthrene-1-carboxylate: **S21** was obtained as yellow foam (0.20 mmol scale of reaction; 80% yield).  $R_f = 0.25$  (10% EtOAc in *n*-hexane).

$^1\text{H}$  NMR (500 MHz,  $\text{CDCl}_3$ ):  $\delta$  7.44 (s, 1H), 7.24 – 7.22 (m, 1H), 7.21 (d,  $J = 2.1$  Hz, 1H), 7.01 (d,  $J = 1.0$  Hz, 1H), 6.94 (s, 1H), 6.91 (s, 1H), 3.83 (s, 3H), 3.66 (s, 3H), 2.94 (dd,  $J = 9.0$ , 4.6 Hz, 2H), 2.37 (d,  $J = 12.2$  Hz, 1H), 2.23 (dd,  $J = 12.5$ , 2.3 Hz, 1H), 1.96 (s, 3H), 1.89 – 1.82 (m, 1H), 1.77 (d,  $J = 11.2$  Hz, 2H), 1.66 (d,  $J = 6.3$  Hz, 1H), 1.54 (d,  $J = 12.7$  Hz, 1H), 1.45 (dd,  $J = 13.0$ , 2.3 Hz, 1H), 1.28 (s, 3H), 1.24 (d,  $J = 0.7$  Hz, 3H).

$^{13}\text{C}$  NMR (125 MHz,  $\text{CDCl}_3$ ):  $\delta$  196.5, 178.6, 150.1, 144.5, 142.7, 129.4, 127.4, 122.6, 117.3, 52.1, 47.4, 44.2, 37.8, 37.3, 36.5, 29.9, 29.5, 25, 20.9, 18.3, 16.5.

IR (neat)  $\nu_{\text{max}}$  2958, 2848, 2369, 1710, 1489, 1234, 1112, 965, 786, 720  $\text{cm}^{-1}$ .

**HRMS (ESI)  $m/z$ :**  $[M + H]^+$  calcd. for  $[C_{27}H_{32}O_4 + H]^+$  421.2379, found 421.2381.

$[\alpha]^{25}_{589} = +61.5$  ( $c = 0.5$ ,  $CHCl_3$ ).

### Synthesis of biaryl acetanilide derivative:

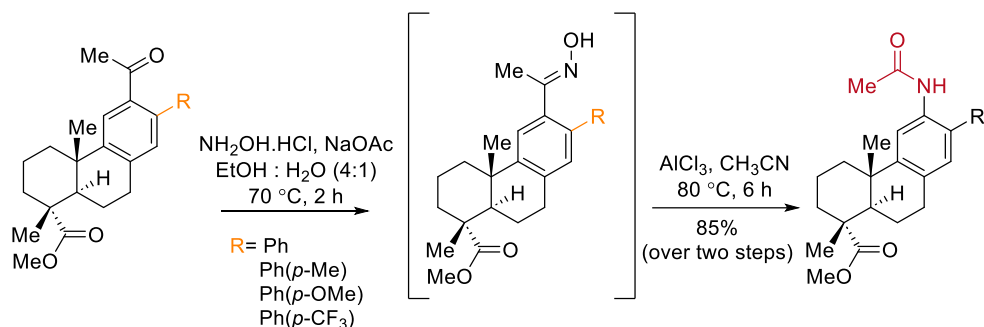

The acetophenone (1.0 equiv.) was dissolved in EtOH (4 mL) in H<sub>2</sub>O (1 mL). Sodium acetate (1.2 equiv.) and hydroxylamine hydrochloride (2.2 equiv.) were added before heating the mixture to reflux. After 1 h of stirring under reflux, the reaction was allowed to cool to ambient temperature and concentrated to dryness *in vacuo*. To the residue was added EtOAc (7 mL X 3) and washed with H<sub>2</sub>O (5 mL X 2). The organic layer was dried (Na<sub>2</sub>SO<sub>4</sub>), filtered and concentrated *in vacuo* to afford the crude product oxime, which was used in the next reaction without further purification.

A mixture of oxime (1.0 equiv.) and anhydrous AlCl<sub>3</sub> (1.0 equiv.) in acetonitrile (5 mL) was stirred for 4 h at 80 °C under N<sub>2</sub>. The mixture was evaporated under reduced pressure to dryness. The residue was washed with dichloromethane (10 mL X 2) and the mixture was evaporated under reduced pressure. Finally, the crude products were purified by flash chromatography with 60% EtOAc in *n*-hexane to afford acetanilide as brown foam (50 mg, 85% yield).

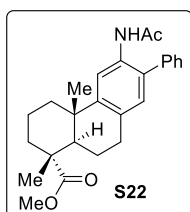

(1*R*,4*aS*,10*aR*) Methyl -6-acetamido-1,4*a*-dimethyl-7-phenyl-1,2,3,4,4*a*,9,10,10*a*-octahydrophenanthrene-1-carboxylate [S22]: Following the general procedure S22 was

obtained as brown foam (0.10 mmol scale of reaction; 85% yield).  $R_f = 0.2$  (20% EtOAc in *n*-hexane).

$^1\text{H NMR}$  (500 MHz,  $\text{CDCl}_3$ ):  $\delta$  8.18 (s, 1H), 7.47 (d,  $J = 7.5$  Hz, 2H), 7.43 – 7.35 (m, 4H), 7.07 (s, 1H), 6.94 (s, 1H), 3.69 (s, 3H), 2.90 (s, 2H), 2.42 (d,  $J = 13.0$  Hz, 1H), 2.28 (d,  $J = 12.5$  Hz, 1H), 2.03 (s, 4H), 1.88 (t,  $J = 11.1$  Hz, 2H), 1.80 (t,  $J = 9.9$  Hz, 4H), 1.69 (s, 1H), 1.32 (s, 3H), 1.30 (s, 3H).

$^{13}\text{C NMR}$  (125 MHz,  $\text{CDCl}_3$ ):  $\delta$  179.1, 168.3, 149.7, 138.3, 132.4, 131.4, 130.4, 130.1, 129.2, 128.9, 127.7, 118.2, 52, 47.8, 44.8, 38, 37.4, 36.7, 29.4, 24.9, 24.5, 21.6, 18.5, 16.5.

**IR** (neat)  $\nu_{\text{max}}$  2968, 1745, 1690, 1564, 1215  $\text{cm}^{-1}$ .

**HRMS** (ESI)  $m/z$ :  $[\text{M} + \text{H}]^+$  calcd. for  $[\text{C}_{26}\text{H}_{31}\text{NO}_3 + \text{H}]^+$  406.2382, found 406.2367.

$[\alpha]_{\text{D}}^{25} = +76.2$  ( $c = 0.6$ ,  $\text{CHCl}_3$ ).

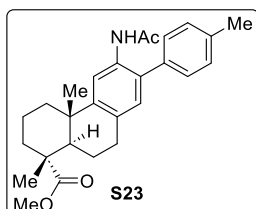

(1*R*,4*aS*,10*aR*) **Methyl -6-amino-1,4*a*-dimethyl-7-(*p*-tolyl)-1,2,3,4,4*a*,9,10,10*a*-octahydrophenanthrene-1-carboxylate [S23]**: Following the general procedure **S23** was obtained as brown foam (0.12 mmol scale of reaction; 85% yield).  $R_f = 0.3$  (20% EtOAc in *n*-hexane).

$^1\text{H NMR}$  (500 MHz,  $\text{CDCl}_3$ ):  $\delta$  8.18 (s, 1H), 7.30 (d,  $J = 7.5$  Hz, 2H), 7.09 – 7.05 (m, 1H), 7.01 (d,  $J = 8.5$  Hz, 2H), 6.91 (s, 1H), 3.88 (s, 3H), 3.69 (s, 3H), 2.93 – 2.86 (m, 2H), 2.41 (d,  $J = 12.7$  Hz, 1H), 2.27 (d,  $J = 2.2$  Hz, 1H), 2.04 (s, 3H), 1.91 – 1.86 (m, 1H), 1.84 – 1.76 (m, 3H), 1.68 (d,  $J = 8.1$  Hz, 1H), 1.31 (s, 3H), 1.30 (s, 3H).



$^{13}\text{C}$  NMR (125 MHz,  $\text{CDCl}_3$ ):  $\delta$  179.1, 168.20, 149.5, 137.5, 135.2, 132.5, 131.2, 130.4, 129.85, 129.7, 129.1, 117.8, 51.9, 47.7, 44.8, 38, 37.4, 36.7, 29.7, 29.4, 24.9, 24.6, 21.6, 21.2, 18.5, 16.5.

IR (neat)  $\nu_{\text{max}}$  2968, 1745, 1690, 1564, 1215  $\text{cm}^{-1}$ .

HRMS (ESI)  $m/z$ :  $[\text{M} + \text{H}]^+$  calcd. for  $[\text{C}_{26}\text{H}_{31}\text{NO}_3 + \text{H}]^+$  406.2382, found 406.2387.

$[\alpha]_D^{25} = +76.2$  ( $c = 0.6$ ,  $\text{CHCl}_3$ ).

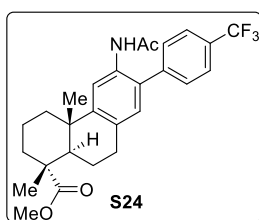

(1*R*,4*aS*,10*aR*)- Methyl -6-acetamido-1,4*a*-dimethyl-7-(4-(trifluoromethyl)phenyl)-1,2,3,4,4*a*,9,10,10*a*-octahydrophenanthrene-1-carboxylate [S24]: Following the general procedure S24 was obtained as brown foam (0.12 mmol scale of reaction; 80% yield).  $R_f = 0.20$  (20% EtOAc in *n*-hexane).

$^1\text{H}$  NMR (500 MHz,  $\text{CDCl}_3$ ):  $\delta$  8.01 (s, 1H), 7.69 (d,  $J = 8.0$  Hz, 2H), 7.47 (d,  $J = 7.9$  Hz, 2H), 6.91 (s, 1H), 6.86 (s, 1H), 3.66 (s, 3H), 2.90 – 2.82 (m, 2H), 2.38 – 2.31 (m, 1H), 2.24 (dd,  $J = 12.5, 2.2$  Hz, 1H), 2.02 (s, 3H), 1.90 – 1.79 (m, 2H), 1.76 (s, 3H), 1.66 (d,  $J = 6.1$  Hz, 1H), 1.56 (d,  $J = 11.6$  Hz, 1H), 1.28 (s, 3H), 1.26 (s, 3H).

$^{13}\text{C}$  NMR (125 MHz,  $\text{CDCl}_3$ ):  $\delta$  179, 174.7, 168.4, 165.9, 147.2, 142, 141, 132.4, 132.2, 132.1, 130.4, 129.6, 125.8, 119.4, 52, 47.7, 44.7, 37.9, 37.4, 36.7, 29.7, 24.9, 24.9, 24.4, 21.5, 18.5, 16.5.

$^{19}\text{F}$  NMR (376 MHz,  $\text{CDCl}_3$ )  $\delta$  -62.43

IR (neat)  $\nu_{\text{max}}$  2968, 1745, 1690, 1564, 1215  $\text{cm}^{-1}$ .

HRMS (ESI)  $m/z$ :  $[\text{M} + \text{H}]^+$  calcd. for  $[\text{C}_{27}\text{H}_{30}\text{F}_3\text{NO}_3 + \text{H}]^+$  474.2256, found 474.2247.

$[\alpha]_{589}^{25} = +76.2$  ( $c = 0.6$ ,  $\text{CHCl}_3$ ).

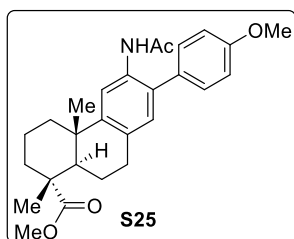

(1*R*,4*aS*,10*aR*)- **Methyl -6-acetamido-7-(4-methoxyphenyl)-1,4*a*-dimethyl-1,2,3,4,4*a*,9,10,10*a*-octahydrophenanthrene-1-carboxylate [S25]:** Following the general procedure **S25** was obtained as brown foam (0.12 mmol scale of reaction; 80% yield).  $R_f = 0.20$  (30% EtOAc in *n*-hexane).

**$^1\text{H NMR}$**  (500 MHz,  $\text{CDCl}_3$ ):  $\delta$  8.18 (s, 1H), 7.30 (d,  $J = 7.5$  Hz, 2H), 7.09 – 7.05 (m, 1H), 7.01 (d,  $J = 8.5$  Hz, 2H), 6.91 (s, 1H), 3.88 (s, 3H), 3.69 (s, 3H), 2.93 – 2.86 (m, 2H), 2.41 (d,  $J = 12.7$  Hz, 1H), 2.27 (d,  $J = 2.2$  Hz, 1H), 2.04 (s, 3H), 1.91 – 1.86 (m, 1H), 1.84 – 1.76 (m, 3H), 1.68 (d,  $J = 8.1$  Hz, 1H), 1.31 (s, 3H), 1.30 (s, 3H).

**$^{13}\text{C NMR}$**  (125 MHz,  $\text{CDCl}_3$ ):  $\delta$  179.1, 168.2, 159.2, 149.4, 132.6, 131.2, 131.4, 130.4, 130.4, 130.4, 129.6, 117.8, 114.4, 114.4, 55.4, 51.9, 47.7, 44.8, 38, 38, 36.7, 29.7, 24.9, 24.6, 21.6, 18.5, 16.5.

**IR** (neat)  $\nu_{\text{max}}$  2968, 1745, 1690, 1564, 1215  $\text{cm}^{-1}$ .

**HRMS** (ESI)  $m/z$ :  $[\text{M} + \text{H}]^+$  calcd. for  $[\text{C}_{27}\text{H}_{33}\text{NO}_4 + \text{H}]^+$  430.2488, found 430.2488.

$[\alpha]_{589}^{25} = +76.2$  ( $c = 0.6$ ,  $\text{CHCl}_3$ ).

**Synthesis of compound (+)-S27:**

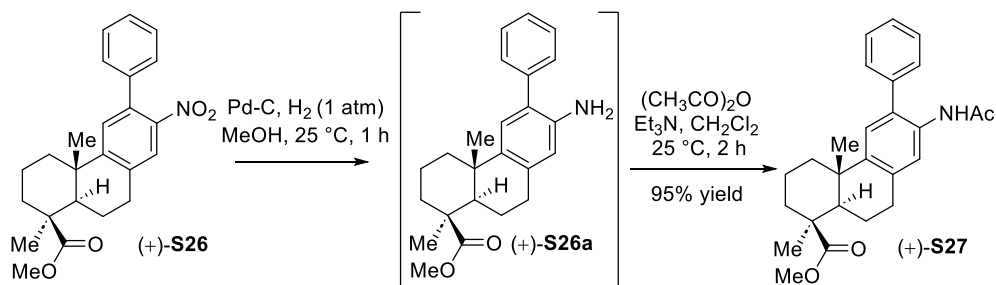

Following the procedure described for (+)-**S3**, compound (+)-**S27** was prepared from (+)-**S26**. For the synthesis of compound (+)-**S26** see ref. 3.

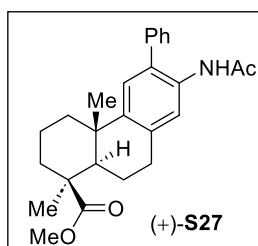

**Methyl (1*S*,4*aS*,10*aR*)-7-acetamido-1,4*a*-dimethyl-6-phenyl-1,2,3,4,4*a*,9,10,10*a*-octahydrophenanthrene-1-carboxylate [(+)-**S27**]:** The compound (+)-**S27** was obtained as yellow gel (0.386 mmol scale of reaction, 149 mg, 95% over 2 steps).  $R_f = 0.35$  (40% EtOAc in *n*-hexane).

**<sup>1</sup>H NMR** (400 MHz, CDCl<sub>3</sub>)  $\delta$  7.87 (s, 1H), 7.45 (t,  $J = 7.3$  Hz, 2H), 7.38 (d,  $J = 7.4$  Hz, 1H), 7.33 (d,  $J = 6.8$  Hz, 2H), 7.11 (s, 1H), 7.03 (s, 1H), 3.65 (s, 3H), 2.99 – 2.93 (m, 1H), 2.87 – 2.79 (m, 1H), 2.28 – 2.22 (m, 2H), 2.22 – 2.14 (m, 2H), 1.99 (s, 3H), 1.60 – 1.53 (m, 2H), 1.41 – 1.37 (m, 1H), 1.27 (s, 3H), 1.13 – 1.04 (m, 2H), 1.02 (s, 3H).

**<sup>13</sup>C NMR** (101 MHz, CDCl<sub>3</sub>)  $\delta$  178.0, 168.4, 144.7, 138.7, 136.1, 131.9, 130.6, 129.4, 129.1, 127.8, 127.5, 122.1, 52.9, 51.4, 44.1, 39.5, 38.4, 37.7, 32.1, 28.6, 24.6, 23.1, 21.0, 20.0.

**IR** (film)  $\nu_{\max}$  3300, 2906, 2510, 1720, 1640, 1500, 1213, 1154, 951, 718 cm<sup>-1</sup>.

**HRMS** (ESI-TOF)  $m/z$ : [M + H]<sup>+</sup> calcd. for [C<sub>26</sub>H<sub>31</sub>O<sub>3</sub>N + H]<sup>+</sup> 406.2377; found 406.2387.

$[\alpha]_D^{25} = +65.25$  ( $c = 0.4$ , CHCl<sub>3</sub>).

**Synthesis of compound (+)-**S28**:**

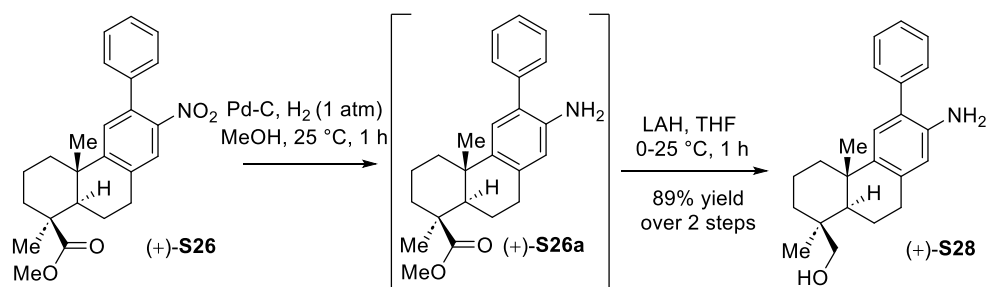

In an oven-dried round-bottom flask compound (+)-**S26** (502 mg, 1.27 mmol, 1.0 equiv.) was taken in MeOH (20 mL) and degassed with N<sub>2</sub> balloon for 10 minutes. To this solution Pd/C (10% w/w) (50 mg) was added and a H<sub>2</sub> gas balloon (1 atm.) was placed with the reaction vessel and stirring continued until the full consumption of starting material (1 h), as confirmed by TLC analysis. The reaction mixture was filtered, evaporated to dryness under the reduced pressure. The crude product (+)-**S26a** was charged for the next step.

Next, in a round-bottom flask, compound (+)-**S26a** (1.27 mmol., 1.0 equiv.) was taken in dry THF (15 mL) and LiAlH<sub>4</sub> (39 mg, 1.02 mmol., 0.8 equiv.) was added to the reaction mixture portion wise and the reaction mixture at 25 °C was stirring continued until the full consumption of starting material. Upon completion (1 h), as monitored by TLC analysis, it was extracted with EtOAc (6 mL X 2). The organic layers were dried over Na<sub>2</sub>SO<sub>4</sub> and concentrated in a rotary evaporator under reduced pressure. The crude product was purified by flash column chromatography with 20% EtOAc in *n*-hexane to afford (+)-**S28** as white foam (380 mg, 89% yield over 2 steps).

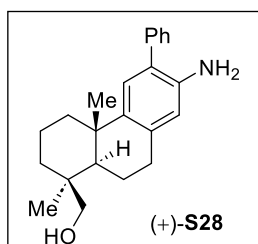

((1*S*,4*aS*,10*aR*)-7-amino-1,4*a*-dimethyl-6-phenyl-1,2,3,4,4*a*,9,10,10*a*-

octahydrophenanthren-1-yl)methanol [(+)-**S28**]: (+)-**S28** was obtained as white foam (1.27 mmol scale of reaction, 380 mg, 89% yield over 2 steps). *R<sub>f</sub>* = 0.45 (20% EtOAc in *n*-hexane).

<sup>1</sup>H NMR (500 MHz, CDCl<sub>3</sub>): δ 7.48 – 7.42 (m, 4H), 7.36 (tt, *J* = 5.7, 2.7 Hz, 1H), 7.05 (s, 1H), 6.51 (s, 1H), 3.89 (d, *J* = 10.9 Hz, 1H), 3.60 – 3.55 (m, 1H), 2.95 – 2.78 (m, 3H), 2.30 (d, *J* =

12.9 Hz, 1H), 2.04 – 1.98 (m, 1H), 1.90 (d,  $J = 13.6$  Hz, 1H), 1.77 – 1.66 (m, 2H), 1.62 (dt,  $J = 14.0, 3.6$  Hz, 1H), 1.55 (dd,  $J = 12.7, 1.9$  Hz, 1H), 1.51 – 1.44 (m, 1H), 1.22 (s, 3H), 1.09 (s, 3H).

$^{13}\text{C}$  NMR (125 MHz,  $\text{CDCl}_3$ ):  $\delta$  141.1, 140.5, 139.8, 135.4, 129.2, 128.7, 127.0, 126.8, 126.3, 115.6, 65.3, 51.6, 39.2, 38.7, 37.2, 35.3, 30.8, 26.9, 25.9, 19.2, 19.0.

IR (film)  $\nu_{\text{max}}$  3240, 2930, 1740, 1589, 1590, 1217, 1154, 946, 796  $\text{cm}^{-1}$ .

HRMS (ESI-TOF)  $m/z$ :  $[\text{M} + \text{H}]^+$  calcd. for  $[\text{C}_{23}\text{H}_{29}\text{ON} + \text{H}]^+$  336.2322; found 336.2328.

$[\alpha]_{589}^{25} = +78.45$  ( $c = 0.3$ ,  $\text{CHCl}_3$ ).

#### Synthesis of compound (+)-S29:

Following the procedure described for (+)-S4, compound (+)-S29 was prepared from (+)-S28.

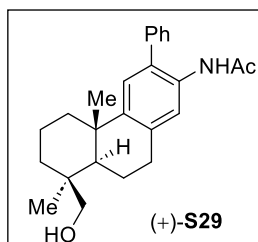

#### *N*-((4b*S*,8*S*,8a*R*)-8-(Hydroxymethyl)-4b,8-dimethyl-3-phenyl-4b,5,6,7,8,8a,9,10-

octahydrophenanthren-2-yl)acetamide [(+)-S29]: (+)-S29 was obtained as yellow oil (0.378 mmol scale of reaction, 124 mg, 87%).  $R_f = 0.35$  (40% EtOAc in *n*-hexane).

$^1\text{H}$  NMR (500 MHz,  $\text{CDCl}_3$ ):  $\delta$  7.89 (s, 1H), 7.49 (t,  $J = 7.5$  Hz, 2H), 7.41 (t,  $J = 7.4$  Hz, 1H), 7.37 (d,  $J = 7.5$  Hz, 2H), 7.14 (s, 1H), 7.07 (s, 1H), 3.88 (d,  $J = 10.9$  Hz, 1H), 3.58 (d,  $J = 10.9$  Hz, 1H), 3.02 (dd,  $J = 17.6, 6.5$  Hz, 1H), 2.91 (ddd,  $J = 17.8, 11.2, 7.3$  Hz, 1H), 2.30 (d,  $J = 12.9$  Hz, 1H), 2.03 (s, 3H), 1.91 (d,  $J = 13.9$  Hz, 1H), 1.77 (dd,  $J = 12.4, 6.6$  Hz, 1H), 1.73 (d,  $J = 5.5$  Hz, 1H), 1.70 (s, 1H), 1.62 (d,  $J = 13.9$  Hz, 1H), 1.54 (d,  $J = 12.7$  Hz, 1H), 1.46 (t,  $J = 12.3$  Hz, 1H), 1.21 (s, 3H), 1.09 (s, 3H), 1.06 – 1.01 (m, 1H).

$^{13}\text{C}$  NMR (125 MHz,  $\text{CDCl}_3$ ):  $\delta$  168.4, 146.3, 138.7, 135.5, 131.7, 130.4, 129.3, 129.0, 127.7, 126.4, 122.2, 65.2, 51.2, 39.0, 38.7, 37.6, 35.2, 30.9, 26.8, 25.8, 24.5, 19.1, 18.9.

**IR** (film)  $\nu_{\max}$  3460, 3210, 2850, 1690, 1580, 1500, 1213, 1154, 987, 736  $\text{cm}^{-1}$ .

**HRMS** (ESI-TOF)  $m/z$ :  $[\text{M} + \text{H}]^+$  calcd. for  $[\text{C}_{25}\text{H}_{31}\text{O}_2\text{N} + \text{H}]^+$  378.2428; found 378.2426.

$[\alpha]_{\text{D}}^{25} = +44.49$  ( $c = 0.3$ ,  $\text{CHCl}_3$ ).

### Synthesis of compound (+)-S30:

Following the procedure described for (+)-S4, compound (+)-S30 was prepared from (+)-S29.

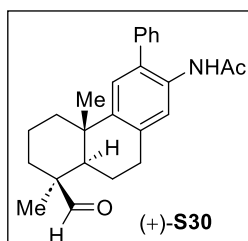

### *N*-((4*bS*,8*S*,8*aR*)-8-Formyl-4*b*,8-dimethyl-3-phenyl-4*b*,5,6,7,8,8*a*,9,10-

octahydrophenanthren-2-yl)acetamide [(+)-S30]: [(+)-S30 was obtained as yellow oil (0.288 mmol scale of reaction, 86 mg, 79%).  $R_f = 0.30$  (20% EtOAc in *n*-hexane).

**$^1\text{H}$  NMR** (500 MHz,  $\text{CDCl}_3$ ):  $\delta$  9.86 (s, 1H), 7.95 (s, 1H), 7.49 (t,  $J = 7.5$  Hz, 2H), 7.42 (d,  $J = 7.3$  Hz, 1H), 7.36 (d,  $J = 7.5$  Hz, 2H), 7.14 (s, 1H), 7.07 (s, 1H), 3.08 (dd,  $J = 17.2, 6.0$  Hz, 1H), 2.96 (ddd,  $J = 17.7, 11.9, 6.8$  Hz, 1H), 2.29 – 2.23 (m, 3H), 2.07 (dd,  $J = 12.9, 6.2$  Hz, 1H), 2.03 (s, 3H), 1.77 (dd,  $J = 14.3, 3.5$  Hz, 1H), 1.74 – 1.71 (m, 1H), 1.69 – 1.62 (m, 2H), 1.43 (dt,  $J = 11.6, 7.0$  Hz, 1H), 1.14 (s, 3H), 1.09 (s, 3H).

**$^{13}\text{C}$  NMR** (125 MHz,  $\text{CDCl}_3$ ):  $\delta$  205.6, 168.3, 144.0, 138.5, 135.2, 132.0, 130.5, 129.3, 129.0, 127.8, 126.8, 122.0, 51.9, 48.6, 38.4, 37.9, 33.8, 31.2, 24.5, 24.2, 24.1, 19.2, 18.8.

**IR** (film)  $\nu_{\max}$  3328, 2906, 2510, 1769, 1620, 1431, 1320, 1213, 1154, 951, 718, 650  $\text{cm}^{-1}$ .

$[\alpha]_{\text{D}}^{25} = +85.78$  ( $c = 0.5$ ,  $\text{CHCl}_3$ ).

### Synthesis of compound (+)-S31:

Following the procedure described for (+)-**S6**, compound (+)-**S31** was prepared from (+)-**S28**.

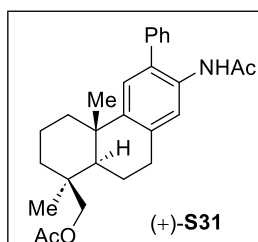

((1*S*,4*aS*,10*aR*)-7-Acetamido-1,4*a*-dimethyl-6-phenyl-1,2,3,4,4*a*,9,10,10*a*-

octahydrophenanthren-1-yl)methyl acetate [(+)-**S31**]: (+)-**S31** was obtained as yellow oil (0.336 mmol scale of reaction, 126 g, 89%).  $R_f = 0.35$  (40% EtOAc in hexane).

**$^1\text{H NMR}$**  (500 MHz,  $\text{CDCl}_3$ ):  $\delta$  7.89 (s, 1H), 7.47 (d,  $J = 7.4$  Hz, 2H), 7.41 (d,  $J = 7.2$  Hz, 1H), 7.38 – 7.35 (m, 2H), 7.14 (s, 1H), 7.08 (s, 1H), 4.35 (d,  $J = 11.0$  Hz, 1H), 4.02 (d,  $J = 11.1$  Hz, 1H), 3.02 (dd,  $J = 17.4, 6.3$  Hz, 1H), 2.91 (ddd,  $J = 17.9, 11.6, 7.3$  Hz, 1H), 2.47 – 2.35 (m, 1H), 2.30 (d,  $J = 12.8$  Hz, 1H), 2.09 (s, 3H), 2.02 (s, 3H), 1.78 – 1.67 (m, 3H), 1.63 – 1.59 (m, 1H), 1.56 – 1.53 (m, 1H), 1.46 (dd,  $J = 13.1, 4.2$  Hz, 1H), 1.24 (s, 3H), 1.12 (dd,  $J = 13.8, 4.0$  Hz, 1H), 1.08 (s, 3H).

**$^{13}\text{C NMR}$**  (125 MHz,  $\text{CDCl}_3$ ):  $\delta$  171.4, 168.4, 146.1, 138.7, 135.4, 131.8, 130.5, 129.3, 129.0, 127.7, 126.4, 122.1, 66.9, 51.3, 38.8, 37.6, 37.1, 36.0, 30.9, 27.4, 25.7, 24.5, 21.0, 19.2, 18.9.

**IR** (film):  $\nu_{\text{max}}$  3410, 2915, 2550, 1700, 1690, 1530, 1253, 1145, 956, 738  $\text{cm}^{-1}$ .

**HRMS** (ESI-TOF)  $m/z$ :  $[\text{M} + \text{H}]^+$  calcd. for  $[\text{C}_{27}\text{H}_{33}\text{O}_3\text{N} + \text{H}]^+$  420.2533; found 420.2538.

$[\alpha]_{\text{D}}^{25} = +52.78$  ( $c = 0.6$ ,  $\text{CHCl}_3$ ).

### General procedure for PIDA Mediated Intramolecular C-N bond Formation:

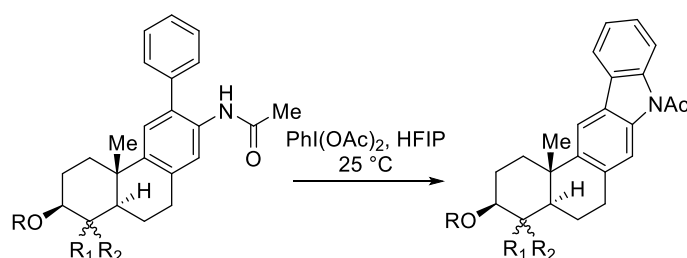

In an oven-dried round-bottom flask acetanilide (1.0 equiv.) was taken in 1,1,1,3,3,3-hexafluoropropan-2-ol under an inert atmosphere. To the solution  $\text{PhI}(\text{OAc})_2$  (1.3 equiv.) was added and stirred the mixture at room temperature. After completion of reaction (monitored by TLC), it was quenched with saturated  $\text{Na}_2\text{S}_2\text{O}_3$  solution then reaction mixture was extracted with  $\text{CH}_2\text{Cl}_2$  (5 mL X 3). The organic layers were dried over  $\text{Na}_2\text{SO}_4$  and concentrated on rotary evaporator under reduced pressure. Then the crude product was purified by flash column chromatography with 20- 60% EtOAc in *n*-Hexane to afford pentacyclic compounds.

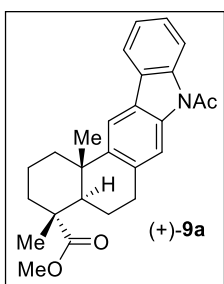

**Methyl (4*R*,4*aR*,13*bS*)-8-acetyl-4,13*b*-dimethyl-2,3,4,4*a*,5,6,8,13*b*-octahydro-1*H*-naphtho[2,1-*b*]carbazole-4-carboxylate [(+)-9*a*]**: (+)-9*a* was obtained as white foam (0.2 mmol scale of reaction; 77 mg; 97%).  $R_f = 0.3$  (10 % EtOAc in *n*-hexane).

**$^1\text{H}$  NMR** (500 MHz,  $\text{CDCl}_3$ ):  $\delta$  8.21 (d,  $J = 8.3$  Hz, 1H), 7.97 (dd,  $J = 7.7, 1.4$  Hz, 1H), 7.87 (d,  $J = 6.1$  Hz, 2H), 7.45 (ddd,  $J = 8.5, 7.3, 1.4$  Hz, 1H), 7.38 (td,  $J = 7.5, 1.0$  Hz, 1H), 3.72 (s, 3H), 3.13 (dd,  $J = 9.0, 4.7$  Hz, 2H), 2.86 (s, 3H), 2.53 (dd,  $J = 12.0, 3.1$  Hz, 1H), 2.33 (dd,  $J = 12.6, 2.4$  Hz, 1H), 1.98 – 1.90 (m, 1H), 1.89 – 1.80 (m, 3H), 1.76 – 1.70 (m, 1H), 1.70 – 1.63 (m, 1H), 1.54 (dtd,  $J = 13.3, 5.0, 2.5$  Hz, 1H), 1.35 (s, 3H), 1.32 (s, 3H).

**$^{13}\text{C}$  NMR** (125 MHz,  $\text{CDCl}_3$ ):  $\delta$  179.0, 170.0, 145.8, 138.9, 137.0, 135.1, 126.9, 126.8, 124.7, 123.6, 119.4, 116.4, 116.2, 115.1, 52.0, 47.6, 44.9, 38.5, 37.4, 36.7, 30.9, 27.7, 25.5, 21.7, 18.6, 16.6.

**IR** (neat)  $\nu_{\text{max}}$  3391, 2887, 1717, 1673, 1399, 1206, 997, 765  $\text{cm}^{-1}$ .

**HRMS** (ESI)  $m/z$ :  $[\text{M} + \text{H}]^+$  calcd. for  $[\text{C}_{26}\text{H}_{29}\text{O}_3\text{N} + \text{H}]^+$  404.2226, found 404.2233.

$[\alpha]_{589}^{25} = +34.70$  ( $c = 0.87$ ,  $\text{CH}_3\text{OH}$ ).



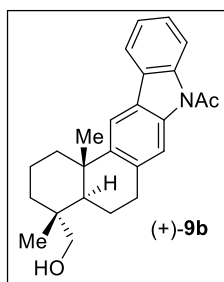

**1-((4*R*,4*aR*,13*bS*)-4-(Hydroxymethyl)-4,13*b*-dimethyl-1,2,3,4,4*a*,5,6,13*b*-octahydro-8*H*-naphtho[2,1-*b*]carbazol-8-yl)ethan-1-one [(+)-**9b**]:** (+)-**9b** was obtained as colourless foam (0.24 mmol scale of reaction; 80.5 mg; 90%).  $R_f = 0.3$  (40 % EtOAc in *n*-hexane).

**$^1\text{H NMR}$**  (500 MHz,  $\text{CDCl}_3$ ):  $\delta$  8.21 (d,  $J = 8.3$  Hz, 1H), 7.96 (d,  $J = 7.6$  Hz, 1H), 7.89 (s, 1H), 7.85 (s, 1H), 7.47 – 7.42 (m, 1H), 7.37 (t,  $J = 7.4$  Hz, 1H), 3.54 (d,  $J = 10.9$  Hz, 1H), 3.28 (d,  $J = 10.9$  Hz, 1H), 3.13 (ddd,  $J = 14.9, 10.2, 7.5$  Hz, 2H), 2.85 (s, 3H), 2.51 (dt,  $J = 12.9, 3.5$  Hz, 1H), 1.94 – 1.80 (m, 4H), 1.77 (dd,  $J = 12.3, 2.3$  Hz, 1H), 1.55 (qd,  $J = 13.2, 4.0$  Hz, 2H), 1.45 (dt,  $J = 12.7, 3.6$  Hz, 1H), 1.33 (s, 3H), 0.96 (s, 3H).

**$^{13}\text{C NMR}$**  (125 MHz,  $\text{CDCl}_3$ ):  $\delta$  170.0, 146.3, 138.9, 136.8, 135.3, 126.9, 126.7, 124.6, 123.6, 119.4, 116.4, 116.1, 115.2, 72.1, 43.8, 38.9, 38.0, 37.8, 35.1, 31.0, 27.7, 25.6, 19.0, 18.7, 17.5.

**IR** (neat):  $\nu_{\text{max}}$  3341, 2888, 2497, 1762, 1683, 1564, 1197, 1161, 973  $\text{cm}^{-1}$ .

**HRMS** (ESI)  $m/z$ :  $[\text{M} + \text{H}]^+$  calcd. for  $[\text{C}_{25}\text{H}_{29}\text{O}_2\text{N} + \text{H}]^+$  376.2271, found 376.2282.

$[\alpha]_{589}^{25} = +29.90$  ( $c = 0.68$ ,  $\text{CH}_3\text{OH}$ ).

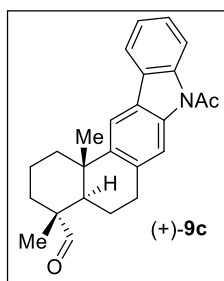

**(4*R*,4*aR*,13*bS*)-8-Acetyl-4,13*b*-dimethyl-2,3,4,4*a*,5,6,8,13*b*-octahydro-1*H*-naphtho[2,1-*b*]carbazole-4-carbaldehyde [(+)-**9c**]:** (+)-**9c** was obtained as colourless liquid (0.19 mmol scale of reaction; 66 mg; 91%).  $R_f = 0.5$  (20 % EtOAc in *n*-hexane).

**<sup>1</sup>H NMR** (500 MHz, CDCl<sub>3</sub>): δ 9.34 (s, 1H), 8.21 (d, *J* = 8.4 Hz, 1H), 7.98 (dd, *J* = 7.6, 1.4 Hz, 1H), 7.90 (d, *J* = 4.3 Hz, 2H), 7.46 (ddd, *J* = 8.5, 7.2, 1.4 Hz, 1H), 7.39 (td, *J* = 7.5, 1.0 Hz, 1H), 3.17 – 3.10 (m, 2H), 2.87 (s, 3H), 2.58 (dt, *J* = 13.1, 3.6 Hz, 1H), 2.02 (dd, *J* = 12.8, 2.0 Hz, 1H), 1.92 (ttt, *J* = 10.9, 5.2, 2.5 Hz, 3H), 1.64 (dd, *J* = 12.7, 4.8 Hz, 2H), 1.57 – 1.51 (m, 1H), 1.45 – 1.40 (m, 1H), 1.34 (s, 3H), 1.24 (s, 3H).

**<sup>13</sup>C NMR** (125 MHz, CDCl<sub>3</sub>): δ 206.1, 170.0, 145.1, 138.9, 137.1, 134.8, 126.9, 126.8, 124.8, 123.6, 119.4, 116.4, 116.3, 115.1, 49.8, 42.9, 38.3, 36.8, 32.1, 30.7, 27.7, 25.5, 21.4, 17.8, 14.2.

**IR** (neat):  $\nu_{\max}$  2937, 2487, 1741, 1638, 1493, 1289, 1199, 903, 698 cm<sup>-1</sup>.

$[\alpha]_{589}^{25} = +32.10$  (*c* = 0.57, CH<sub>3</sub>OH).

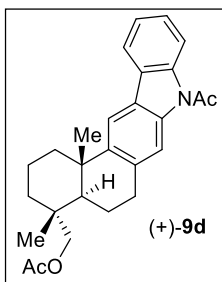

**((4*R*,4*aR*,13*bS*)-8-Acetyl-4,13*b*-dimethyl-2,3,4,4*a*,5,6,8,13*b*-octahydro-1*H*-naphtho[2,1-*b*]carbazol-4-yl)methyl acetate [(+)-9d]**: (+)-9d was obtained as white foam (0.25 mmol scale of reaction; 100 mg; 96%). *R<sub>f</sub>* = 0.35 (15 % EtOAc in *n*-hexane).

**<sup>1</sup>H NMR** (500 MHz, CDCl<sub>3</sub>): δ 8.22 (d, *J* = 8.4 Hz, 1H), 7.97 (d, *J* = 7.6 Hz, 1H), 7.89 (d, *J* = 10.2 Hz, 2H), 7.45 (t, *J* = 7.8 Hz, 1H), 7.38 (t, *J* = 7.4 Hz, 1H), 4.04 (d, *J* = 11.0 Hz, 1H), 3.77 (d, *J* = 11.0 Hz, 1H), 3.21 – 3.13 (m, 1H), 3.10 – 3.02 (m, 1H), 2.87 (s, 3H), 2.53 (dt, *J* = 12.9, 3.4 Hz, 1H), 2.07 (s, 3H), 1.93 – 1.83 (m, 3H), 1.82 – 1.76 (m, 1H), 1.74 (dd, *J* = 11.5, 3.4 Hz, 1H), 1.58 (dd, *J* = 13.1, 3.8 Hz, 1H), 1.52 (dt, *J* = 9.0, 4.4 Hz, 2H), 1.34 (s, 3H), 1.02 (s, 3H).

**<sup>13</sup>C NMR** (125 MHz, CDCl<sub>3</sub>): δ 171.3, 170.0, 146.1, 138.9, 136.9, 135.2, 126.9, 126.8, 124.7, 123.6, 119.4, 116.4, 116.2, 115.3, 72.5, 44.3, 38.8, 37.9, 36.9, 35.6, 31.1, 27.7, 25.6, 21.0, 19.1, 18.6, 17.6.

**IR** (neat)  $\nu_{\max}$  2961, 2593, 1732, 1681, 1606, 1252, 1189, 967, 761  $\text{cm}^{-1}$ .

**HRMS** (ESI)  $m/z$ :  $[M+Na]^+$  calcd. for  $[C_{27}H_{31}O_3N+Na]^+$  440.2196, found 440.2235.

$[\alpha]^{25}_{589} = +31.30$  ( $c = 0.41$ ,  $\text{CH}_3\text{OH}$ ).

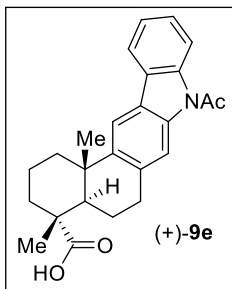

**(4*R*,4*aR*,13*bS*)-8-Acetyl-4,13*b*-dimethyl-2,3,4,4*a*,5,6,8,13*b*-octahydro-1*H*-naphtho[2,1-*b*]carbazole-4-carboxylic acid [(+)-9*e*]**: (+)-9*e* was obtained as light yellow foam (0.27 mmol scale of reaction; 94 mg; 89% yield).  $R_f = 0.3$  (40 % EtOAc in *n*-hexane).

**$^1\text{H NMR}$**  (500 MHz,  $\text{CDCl}_3$ ):  $\delta$  8.21 (d,  $J = 8.3$  Hz, 1H), 7.97 (d,  $J = 7.5$  Hz, 1H), 7.88 (d,  $J = 4.0$  Hz, 2H), 7.49 – 7.42 (m, 1H), 7.38 (q,  $J = 6.5, 5.7$  Hz, 1H), 3.16 (d,  $J = 7.6$  Hz, 2H), 2.87 (s, 3H), 2.55 (d,  $J = 12.8$  Hz, 1H), 2.35 (d,  $J = 12.5$  Hz, 1H), 1.99 (t,  $J = 10.5$  Hz, 1H), 1.94 – 1.79 (m, 4H), 1.73 – 1.62 (m, 2H), 1.37 (s, 3H), 1.34 (s, 3H).

**$^{13}\text{C NMR}$**  (125 MHz,  $\text{CDCl}_3$ ):  $\delta$  184.5, 170.0, 145.7, 138.9, 137.0, 135.1, 126.9, 126.8, 124.7, 123.6, 119.4, 116.4, 116.3, 115.1, 47.4, 44.7, 38.4, 37.4, 36.8, 30.9, 27.6, 25.5, 21.8, 18.6, 16.3.

**IR** (neat)  $\nu_{\max}$  3387, 3010, 2953, 2467, 1683, 1475, 1365, 1107, 691  $\text{cm}^{-1}$ .

**HRMS** (ESI)  $m/z$ :  $[M+Na]^+$  calcd. for  $[C_{25}H_{27}O_3N+Na]^+$  412.1883, found 412.1877.

$[\alpha]^{25}_{589} = +25.80$  ( $c = 0.46$ ,  $\text{CH}_3\text{OH}$ ).

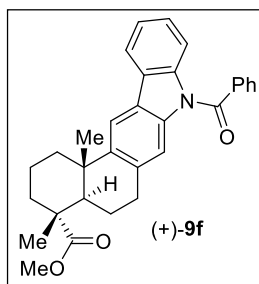

**Methyl (4*R*,4*aR*,13*bS*)-8-benzoyl-4,13*b*-dimethyl-2,3,4,4*a*,5,6,8,13*b*-octahydro-1*H*-naphtho[2,1-*b*]carbazole-4-carboxylate [(+)-**9f**]**: (+)-**9f** was obtained as light yellow foam (0.237 mmol scale of reaction; 78 mg; 71% yield).  $R_f = 0.3$  (10 % EtOAc in *n*-hexane).

**$^1\text{H NMR}$**  (500 MHz,  $\text{CDCl}_3$ ):  $\delta$  7.97 (d,  $J = 7.7$  Hz, 1H), 7.89 (s, 1H), 7.71 (d,  $J = 7.6$  Hz, 2H), 7.66 (t,  $J = 7.5$  Hz, 1H), 7.54 (t,  $J = 7.5$  Hz, 2H), 7.43 (d,  $J = 8.2$  Hz, 1H), 7.33 (t,  $J = 7.4$  Hz, 1H), 7.26 (d,  $J = 7.6$  Hz, 1H), 7.22 (s, 1H), 3.70 (s, 3H), 2.95 (dd,  $J = 10.1, 7.1$  Hz, 2H), 2.54 (d,  $J = 12.7$  Hz, 1H), 2.30 (dd,  $J = 12.5, 2.3$  Hz, 1H), 1.87 (dt,  $J = 33.2, 13.5$  Hz, 4H), 1.70 (dd,  $J = 17.9, 10.6$  Hz, 2H), 1.50 – 1.45 (m, 1H), 1.34 (s, 3H), 1.32 (s, 3H).

**$^{13}\text{C NMR}$**  (125 MHz,  $\text{CDCl}_3$ ):  $\delta$  179.1, 169.5, 145.8, 139.3, 137.5, 136.0, 134.7, 132.1, 128.9, 128.8, 126.6, 126.2, 124.3, 123.3, 119.4, 115.9, 115.8, 115.0, 52.0, 47.6, 44.9, 38.5, 37.5, 36.7, 30.7, 25.5, 21.7, 18.6, 16.6.

**IR** (neat):  $\nu_{\text{max}}$  3188, 2934, 2849, 1709, 1678, 1456, 1369, 1179, 918, 682  $\text{cm}^{-1}$ .

**HRMS** (ESI)  $m/z$ :  $[\text{M} + \text{Na}]^+$  calcd. for  $[\text{C}_{31}\text{H}_{31}\text{O}_3\text{N} + \text{Na}]^+$  488.2196, found 488.2179.

$[\alpha]_{589}^{25} = +38.40$  ( $c = 0.71$ ,  $\text{CH}_3\text{OH}$ ).

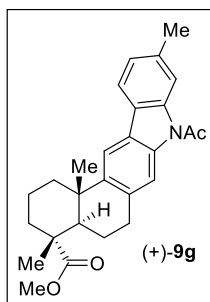

**Methyl (4*R*,4*aR*,13*bS*)-8-acetyl-4,10,13*b*-trimethyl-2,3,4,4*a*,5,6,8,13*b*-octahydro-1*H*-naphtho[2,1-*b*]carbazole-4-carboxylate [(+)-9*g*]:** (+)-9*g* was obtained as yellow gel (0.269 mmol scale of reaction; 103.5 mg; 92%).  $R_f = 0.2$  (10 % EtOAc in *n*-hexane).

**$^1\text{H NMR}$**  (500 MHz,  $\text{CDCl}_3$ ):  $\delta$  8.06 (s, 1H), 7.82 (q,  $J = 4.7$  Hz, 3H), 7.20 (d,  $J = 7.9$  Hz, 1H), 3.71 (s, 3H), 3.12 (dd,  $J = 9.3, 4.7$  Hz, 2H), 2.86 (s, 3H), 2.55 (s, 4H), 2.37 – 2.28 (m, 1H), 1.95 (td,  $J = 13.2, 6.6$  Hz, 1H), 1.87 – 1.81 (m, 2H), 1.72 (d,  $J = 8.9$  Hz, 1H), 1.69 – 1.61 (m, 2H), 1.54 (dd,  $J = 12.3, 5.6$  Hz, 1H), 1.35 (s, 3H), 1.32 (s, 3H).

**$^{13}\text{C NMR}$**  (125 MHz,  $\text{CDCl}_3$ ):  $\delta$  179.1, 170.0, 145.7, 139.3, 137.0, 136.9, 134.5, 124.9, 124.8, 124.4, 119.0, 116.9, 116.1, 114.8, 52.0, 47.6, 44.9, 38.5, 37.4, 36.7, 30.9, 27.7, 25.4, 22.3, 21.8, 18.6, 16.6.

**IR** (neat)  $\nu_{\text{max}}$  3068, 2926, 1706, 1614, 1506, 1467, 1206, 1035, 738  $\text{cm}^{-1}$ .

**HRMS** (ESI)  $m/z$ :  $[\text{M} + \text{Na}]^+$  calcd. for  $[\text{C}_{27}\text{H}_{31}\text{O}_3\text{N} + \text{Na}]^+$  418.2377, found 418.2399.

$[\alpha]_{\text{D}}^{25} = +44.4$  ( $c = 0.81$ ,  $\text{CH}_3\text{OH}$ ).

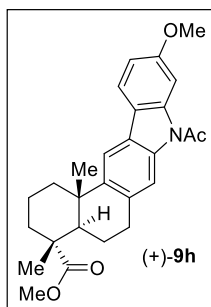

**Methyl (4*R*,4*aR*,13*bS*)-8-acetyl-10-methoxy-4,13*b*-dimethyl-2,3,4,4*a*,5,6,8,13*b*-octahydro-1*H*-naphtho[2,1-*b*]carbazole-4-carboxylate [(+)-9*h*]:** (+)-9*h* was obtained as yellow gel (0.245 mmol scale of reaction; 45 mg; 42% yield).  $R_f = 0.3$  (10 % EtOAc in *n*-hexane).

**$^1\text{H NMR}$**  (500 MHz,  $\text{CDCl}_3$ ):  $\delta$  7.89 (d,  $J = 2.4$  Hz, 1H), 7.78 (d,  $J = 8.5$  Hz, 1H), 7.74 (s, 1H), 7.66 (s, 1H), 6.94 (dd,  $J = 8.5, 2.3$  Hz, 1H), 3.90 (s, 3H), 3.68 (s, 3H), 3.10 – 3.03 (m, 3H), 2.48 (d,  $J = 13.1$  Hz, 1H), 2.32 – 2.25 (m, 1H), 1.83 – 1.75 (m, 4H), 1.70 – 1.66 (m, 2H), 1.59 (d,  $J = 8.7$  Hz, 1H), 1.49 (ddt,  $J = 12.5, 5.8, 2.5$  Hz, 2H), 1.31 (s, 3H), 1.28 (s, 3H).

**$^{13}\text{C}$  NMR** (125 MHz,  $\text{CDCl}_3$ ):  $\delta$  179.18, 170.22, 159.47, 145.81, 140.39, 136.88, 133.56, 125.02, 120.24, 119.80, 115.89, 114.57, 111.20, 102.33, 55.85, 52.11, 47.72, 45.02, 38.50, 37.47, 36.76, 30.97, 27.75, 25.49, 21.85, 18.69, 16.67.

**IR** (neat)  $\nu_{\text{max}}$  2976, 2904, 2837, 1831, 1713, 1589, 1176, 1023, 882, 680  $\text{cm}^{-1}$ .

**HRMS** (ESI)  $m/z$ :  $[\text{M} + \text{H}]^+$  calcd. for  $[\text{C}_{27}\text{H}_{31}\text{O}_4\text{N} + \text{H}]^+$  434.2331, found 434.2330.

$[\alpha]_{589}^{25} = +52.70$  ( $c = 0.3$ ,  $\text{CH}_3\text{OH}$ ).

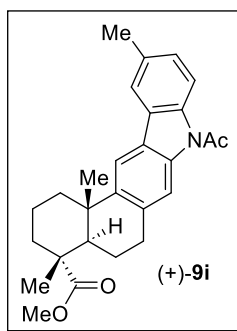

**Methyl (4*R*,4*aR*,13*bS*)-8-acetyl-4,11,13*b*-trimethyl-2,3,4,4*a*,5,6,8,13*b*-octahydro-1*H*-naphtho[2,1-*b*]carbazole-4-carboxylate [(+)-9*i*]**: (+)-9*i* was obtained as white foam (0.2 mmol scale of reaction; 58 mg; 69% yield).  $R_f = 0.22$  (10 % EtOAc in *n*-hexane).

**$^1\text{H}$  NMR** (500 MHz,  $\text{CDCl}_3$ ):  $\delta$  8.06 (s, 1H), 7.84 – 7.81 (m, 3H), 7.22 – 7.19 (m, 1H), 3.71 (s, 3H), 3.12 (dd,  $J = 9.0, 4.7$  Hz, 2H), 2.86 (s, 3H), 2.55 (s, 3H), 2.52 (d,  $J = 13.6$  Hz, 1H), 2.33 (dd,  $J = 12.7, 2.5$  Hz, 1H), 1.99 – 1.92 (m, 1H), 1.91 – 1.84 (m, 2H), 1.83 – 1.73 (m, 2H), 1.72 – 1.63 (m, 2H), 1.35 (s, 3H), 1.32 (s, 3H).

**$^{13}\text{C}$  NMR** (126 MHz,  $\text{CDCl}_3$ ):  $\delta$  179.0, 169.8, 145.7, 137.2, 137.0, 135.0, 133.2, 127.8, 127.2, 124.7, 119.6, 116.1, 115.0, 52.0, 47.6, 44.9, 38.5, 37.4, 36.7, 30.9, 27.6, 25.4, 21.8, 21.2, 18.6, 16.6.

**IR** (neat)  $\nu_{\text{max}}$  3391, 2887, 1717, 1673, 1399, 1206, 997, 765  $\text{cm}^{-1}$ .

$[\alpha]_{589}^{25} = +37.47$  ( $c = 0.85$ ,  $\text{CH}_3\text{OH}$ ).

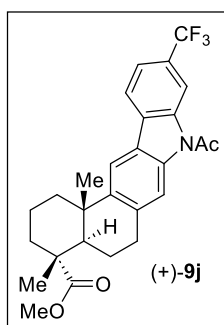

**Methyl (4*R*,4*aR*,13*bS*)-8-acetyl-4,13*b*-dimethyl-10-(trifluoromethyl)-2,3,4,4*a*,5,6,8,13*b*-octahydro-1*H*-naphtho[2,1-*b*]carbazole-4-carboxylate [(+)-9j]:** (+)-9j was obtained as yellow foam (0.222 mmol scale of reaction; 87 mg; 83%).  $R_f = 0.25$  (10 % EtOAc in *n*-hexane).

**$^1\text{H NMR}$**  (500 MHz,  $\text{CDCl}_3$ ):  $\delta$  8.60 (s, 1H), 7.97 (dt,  $J = 8.2, 0.8$  Hz, 1H), 7.87 (s, 1H), 7.68 (s, 1H), 7.60 – 7.55 (m, 1H), 3.69 (s, 3H), 3.13 – 3.06 (m, 2H), 2.82 (s, 3H), 2.53 – 2.45 (m, 1H), 2.29 (dd,  $J = 12.5, 2.4$  Hz, 1H), 1.96 – 1.88 (m, 1H), 1.85 – 1.76 (m, 3H), 1.72 – 1.68 (m, 1H), 1.66 – 1.58 (m, 1H), 1.52 (ddt,  $J = 11.9, 4.7, 2.4$  Hz, 1H), 1.32 (s, 3H), 1.29 (d,  $J = 0.7$  Hz, 3H).

**$^{13}\text{C NMR}$**  (125 MHz,  $\text{CDCl}_3$ ):  $\delta$  179.1, 169.9, 146.3, 138.5, 137.5, 136.7, 123.7, 120.6, 120.6, 119.5, 116.1, 115.9, 52.1, 47.7, 44.9, 38.5, 37.5, 36.8, 31.1, 27.7, 25.5, 21.7, 18.6, 16.7.

**$^{19}\text{F NMR}$**  (376 MHz,  $\text{CDCl}_3$ )  $\delta$  -62.43

**IR** (neat)  $\nu_{\text{max}}$  3013, 2894, 1710, 1667, 1468, 1381, 1213, 1187, 993, 634  $\text{cm}^{-1}$ .

**HRMS** (ESI)  $m/z$ :  $[\text{M} + \text{H}]^+$  calcd. for  $[\text{C}_{27}\text{H}_{28}\text{F}_3\text{O}_3\text{N} + \text{H}]^+$  472.2100, found 472.2100.

$[\alpha]_{589}^{25} = +39.0$  ( $c = 0.47$ ,  $\text{CH}_3\text{OH}$ ).

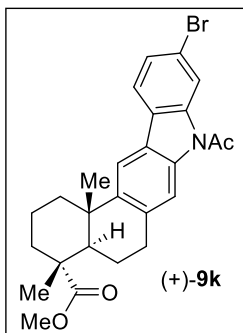

**Methyl (4R,4aR,13bS)-8-acetyl-10-bromo-4,13b-dimethyl-2,3,4,4a,5,6,8,13b-octahydro-1H-naphtho[2,1-b]carbazole-4-carboxylate [(+)-9k]:** (+)-9k was obtained as white foam (0.2 mmol scale of reaction; 80 mg; 83%).  $R_f = 0.28$  (10 % EtOAc in *n*-hexane).

**$^1\text{H NMR}$**  (500 MHz,  $\text{CDCl}_3$ ):  $\delta$  7.85 (s, 1H), 7.81 (d,  $J = 8.2$  Hz, 1H), 7.74 (s, 1H), 7.59 – 7.57 (m, 1H), 7.51 (dd,  $J = 8.2, 1.7$  Hz, 1H), 3.71 (s, 3H), 3.13 (dd,  $J = 9.1, 4.8$  Hz, 2H), 2.86 (s, 3H), 2.34 – 2.30 (m, 2H), 1.94 – 1.87 (m, 2H), 1.84 (dd,  $J = 9.3, 2.8$  Hz, 3H), 1.75 (d,  $J = 7.8$  Hz, 2H), 1.65 (t,  $J = 4.4$  Hz, 2H), 1.35 (s, 3H), 1.32 (s, 3H).

**$^{13}\text{C NMR}$**  (101 MHz,  $\text{CDCl}_3$ ):  $\delta$  179.1, 169.9, 146.2, 139.8, 136.8, 135.7, 126.9, 125.7, 124.1, 120.4, 120.3, 119.9, 116.0, 115.4, 52.1, 47.7, 44.9, 38.5, 37.5, 36.8, 31.0, 27.7, 25.5, 21.7, 18.7, 16.7.

**IR** (neat)  $\nu_{\text{max}}$  3391, 2887, 1717, 1673, 1399, 1206, 997, 765  $\text{cm}^{-1}$ .

$[\alpha]_{589}^{25} = +41.68$  ( $c = 0.85$ ,  $\text{CH}_3\text{OH}$ ).

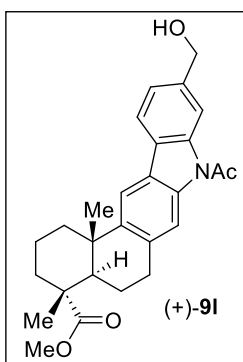

**Methyl (4R,4aR,13bS)-8-acetyl-10-(hydroxymethyl)-4,13b-dimethyl-2,3,4,4a,5,6,8,13b-octahydro-1H-naphtho[2,1-b]carbazole-4-carboxylate [(+)-9l]:** (+)-9l was obtained as white foam (0.2 mmol scale of reaction; 80 mg; 83%).  $R_f = 0.28$  (10 % EtOAc in *n*-hexane).



**<sup>1</sup>H NMR** (500 MHz, CDCl<sub>3</sub>): δ 8.19 (s, 1H), 7.86 (d, *J* = 0.8 Hz, 1H), 7.81 (s, 1H), 7.76 (s, 1H), 7.35 – 7.33 (m, 1H), 4.80 (s, 2H), 3.67 (s, 3H), 3.08 (dd, *J* = 9.1, 4.8 Hz, 2H), 2.79 (s, 3H), 2.48 (d, *J* = 12.5 Hz, 1H), 2.41 – 2.33 (m, 1H), 1.95 – 1.86 (m, 2H), 1.79 (q, *J* = 2.9 Hz, 3H), 1.71 – 1.66 (m, 2H), 1.31 (s, 3H), 1.28 (s, 3H).

**<sup>13</sup>C NMR** (101 MHz, CDCl<sub>3</sub>): δ 179.2, 170.2, 145.9, 140, 137.2, 135.2, 124.6, 123.1, 122.8, 122.5, 119.4, 116.2, 115.2, 113.5, 65.9, 60.5, 52.1, 47.7, 45, 37.5, 36.8, 31, 27.8, 25.5, 18.9, 16.7, 14.3.

**IR** (neat)  $\nu_{\max}$  3364, 2883, 1726, 1675, 1342, 1217, 974, 735 cm<sup>-1</sup>.

$[\alpha]_{589}^{25} = +44.6$  (*c* = 0.3, CH<sub>3</sub>OH).

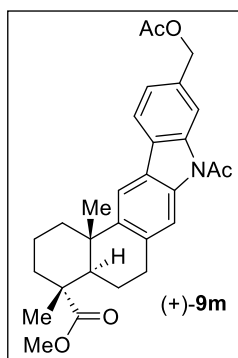

**Methyl (4R,4aR,13bS)-10-(acetoxymethyl)-8-acetyl-4,13b-dimethyl-2,3,4,4a,5,6,8,13b-octahydro-1H-naphtho[2,1-b]carbazole-4-carboxylate [(+)-9m]:** (+)-9m was obtained as white foam (0.2 mmol scale of reaction; 80 mg; 83%). *R<sub>f</sub>* = 0.28 (10 % EtOAc in *n*-hexane).

**<sup>1</sup>H NMR** (400 MHz, CDCl<sub>3</sub>): δ 8.29 (s, 1H), 7.91 (dd, *J* = 7.9, 0.6 Hz, 1H), 7.84 (s, 1H), 7.76 (s, 1H), 7.36 (dd, *J* = 7.9, 1.5 Hz, 1H), 5.24 (s, 2H), 3.68 (s, 3H), 3.10 (dd, *J* = 9.0, 4.7 Hz, 2H), 2.85 (s, 3H), 2.48 (s, 1H), 2.36 – 2.25 (m, 1H), 2.12 (s, 3H), 1.96 – 1.86 (m, 2H), 1.83 (s, 1H), 1.77 (s, 2H), 1.69 (d, *J* = 8.3 Hz, 1H), 1.52 – 1.48 (m, 1H), 1.31 (s, 3H), 1.28 (s, 3H).

**<sup>13</sup>C NMR** (126 MHz, CDCl<sub>3</sub>): δ 179.0, 171.0, 170.0, 145.9, 139.1, 137.2, 135.4, 134.6, 126.8, 124.4, 124.1, 119.4, 116.9, 116.0, 115.4, 67.0, 52.1, 47.6, 44.9, 38.4, 37.4, 36.7, 31.0, 27.7, 25.4, 21.7, 21.1, 18.6, 16.6.

**IR** (neat)  $\nu_{\max}$  3365, 2877, 1765, 1623, 1344, 1225, 987, 745  $\text{cm}^{-1}$ .

$[\alpha]^{25}_{589} = +53.4$  ( $c = 0.85$ ,  $\text{CH}_3\text{OH}$ ).

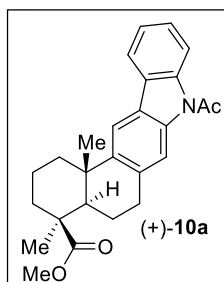

**(4*S*,4*aR*,13*bS*)-Methyl 8-acetyl-4,13*b*-dimethyl-2,3,4,4*a*,5,6,8,13*b*-octahydro-1*H*-naphtho[2,1-*b*]carbazole-4-carboxylate [(+)-10a]:** (+)-10a was obtained as yellow foam (0.236 mmol scale of reaction, 88 mg, 92%).  $R_f = 0.65$  (10% EtOAc in hexane).

**$^1\text{H NMR}$**  (500 MHz,  $\text{CDCl}_3$ ):  $\delta$  8.21 (d,  $J = 8.4$  Hz, 1H), 7.96 (d,  $J = 7.6$  Hz, 1H), 7.91 (s, 1H), 7.88 (s, 1H), 7.45 (t,  $J = 7.8$  Hz, 1H), 7.38 (t,  $J = 7.5$  Hz, 1H), 3.71 (s, 3H), 3.14 (dd,  $J = 16.9$ , 5.3 Hz, 1H), 3.08 – 2.99 (m, 1H), 2.88 (s, 3H), 2.49 (d,  $J = 12.7$  Hz, 1H), 2.32 (dd,  $J = 27.4$ , 13.8 Hz, 2H), 2.11 (dq,  $J = 21.3$ , 8.7, 6.8 Hz, 2H), 1.73 (d,  $J = 13.4$  Hz, 1H), 1.66 (d,  $J = 12.3$  Hz, 1H), 1.56 – 1.50 (m, 1H), 1.34 (s, 3H), 1.20 – 1.17 (m, 1H), 1.15 (s, 3H).

**$^{13}\text{C NMR}$**  (125 MHz,  $\text{CDCl}_3$ ):  $\delta$  177.9, 170.0, 144.3, 138.9, 136.9, 135.5, 126.9, 126.8, 124.9, 123.6, 119.4, 116.6, 116.3, 116.1, 52.9, 51.3, 44.1, 40.0, 38.7, 37.6, 33.2, 28.6, 27.7, 23.6, 21.2, 20.1.

**IR** (film):  $\nu_{\max}$  2950, 2510, 1710, 1680, 1530, 1213, 1100, 990  $\text{cm}^{-1}$ .

**HRMS** (ESI-TOF)  $m/z$ :  $[\text{M} + \text{H}]^+$  calcd for  $[\text{C}_{26}\text{H}_{29}\text{O}_3\text{N} + \text{H}]^+$  404.2220; found 404.2224.

$[\alpha]^{25}_{589} = +86.27$  ( $c = 0.3$ ,  $\text{CHCl}_3$ ).

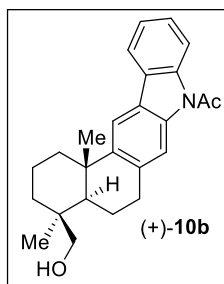

**1-((4*S*,4*aR*,13*bS*)-4-(Hydroxymethyl)-4,13*b*-dimethyl-2,3,4,4*a*,5,6-hexahydro-1*H*-naphtho[2,1-*b*]carbazol-8(13*bH*)-yl)ethanone [(+)-10*b*]:** (+)-10*b* was obtained as yellow foam (0.232 mmol scale of reaction, 76 mg, 88% yield).  $R_f = 0.60$  (20% EtOAc in *n*-hexane).

**$^1\text{H NMR}$**  (500 MHz,  $\text{CDCl}_3$ ):  $\delta$  8.21 (d,  $J = 8.4$  Hz, 1H), 7.96 (d,  $J = 7.6$  Hz, 1H), 7.89 (s, 1H), 7.87 (s, 1H), 7.45 (t,  $J = 7.9$  Hz, 1H), 7.38 (t,  $J = 7.4$  Hz, 1H), 3.96 – 3.91 (m, 1H), 3.63 (d,  $J = 11.0$  Hz, 1H), 3.17 (dd,  $J = 17.3, 6.6$  Hz, 1H), 3.07 (td,  $J = 10.8, 10.2, 5.6$  Hz, 1H), 2.87 (d,  $J = 1.9$  Hz, 3H), 2.55 (d,  $J = 12.7$  Hz, 1H), 2.09 (dd,  $J = 13.2, 7.4$  Hz, 1H), 1.96 (d,  $J = 14.0$  Hz, 1H), 1.82 (tt,  $J = 12.9, 7.1$  Hz, 2H), 1.75 – 1.70 (m, 1H), 1.61 (d,  $J = 12.9$  Hz, 2H), 1.29 – 1.28 (m, 3H), 1.12 (d,  $J = 1.8$  Hz, 3H), 1.10 – 1.06 (m, 1H).

**$^{13}\text{C NMR}$**  (125 MHz,  $\text{CDCl}_3$ ):  $\delta$  170.0, 146.1, 138.9, 136.9, 135.0, 126.9, 126.8, 124.7, 123.6, 119.4, 116.3, 116.1, 115.5, 65.3, 51.3, 39.4, 38.8, 38.0, 35.2, 32.0, 27.7, 26.8, 26.2, 19.3, 19.1.

**IR** (film):  $\nu_{\text{max}}$  3350, 2900, 2510, 1770, 1690, 1566, 1213, 1150, 936  $\text{cm}^{-1}$ .

**HRMS** (ESI-TOF)  $m/z$ :  $[\text{M} + \text{H}]^+$  calcd for  $[\text{C}_{25}\text{H}_{29}\text{O}_2\text{N} + \text{H}]^+$  376.2271; found 376.2272.

$[\alpha]_{589}^{25} = +76.56$  ( $c = 0.1$ ,  $\text{CHCl}_3$ ).

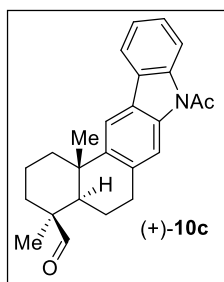

**(4*S*,4*aR*,13*bS*)-8-Acetyl-4,13*b*-dimethyl-2,3,4,4*a*,5,6,8,13*b*-octahydro-1*H*-naphtho[2,1-*b*]carbazole-4-carbaldehyde [(+)-10*c*]**: (+)-10*c* was obtained as colorless oil (0.15 mmol scale of reaction, 40.6 mg, 73% yield).  $R_f = 0.75$  (20% EtOAc in *n*-hexane).

**$^1\text{H NMR}$**  (500 MHz,  $\text{CDCl}_3$ ):  $\delta$  9.91 (s, 1H), 8.18 (d,  $J = 8.4$  Hz, 1H), 7.98 – 7.93 (m, 2H), 7.90 (s, 1H), 7.46 (t,  $J = 7.9$  Hz, 1H), 7.38 (t,  $J = 7.5$  Hz, 1H), 3.23 (dd,  $J = 16.9, 5.9$  Hz, 1H), 3.13 (ddd,  $J = 17.5, 11.6, 6.7$  Hz, 1H), 2.88 (s, 3H), 2.52 (d,  $J = 12.9$  Hz, 1H), 2.31 (d,  $J = 14.4$  Hz, 2H), 2.16 (dd,  $J = 12.6, 6.1$  Hz, 1H), 1.86 (t,  $J = 14.0$  Hz, 1H), 1.81 – 1.72 (m, 2H), 1.57 – 1.53 (m, 1H), 1.20 (s, 1H), 1.18 (s, 6H).

**$^{13}\text{C NMR}$**  (125 MHz,  $\text{CDCl}_3$ ):  $\delta$  205.6, 170.0, 143.9, 137.1, 134.7, 126.9, 126.7, 124.9, 123.6, 119.5, 116.3, 116.2, 116.0, 52.0, 48.7, 38.9, 38.3, 33.9, 32.3, 27.7, 24.6, 24.2, 19.3, 19.0.

**IR** (film):  $\nu_{\text{max}}$  2956, 255, 1756, 1640, 1485, 1320, 1213, 1196, 910, 715, 667  $\text{cm}^{-1}$ .

**HRMS** (ESI-TOF)  $m/z$ :  $[\text{M} + \text{H}]^+$  calcd. for  $[\text{C}_{25}\text{H}_{27}\text{O}_2\text{N} + \text{H}]^+$  374.2115; found 374.2108.

$[\alpha]_{589}^{25} = +54.13$  ( $c = 0.4$ ,  $\text{CHCl}_3$ ).

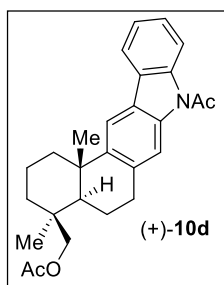

**((4*S*,4*aR*,13*bS*)-8-Acetyl-4,13*b*-dimethyl-2,3,4,4*a*,5,6,8,13*b*-octahydro-1*H*-naphtho[2,1-*b*]carbazol-4-yl)methyl acetate [(+)-10*d*]**: (+)-10*d* was obtained as yellow oil (0.197 mmol scale of reaction, 67 mg, 81%).  $R_f = 0.6$  (10% EtOAc in hexane).

**$^1\text{H NMR}$**  (400 MHz,  $\text{CDCl}_3$ )  $\delta$  8.17 (d,  $J = 8.3$  Hz, 1H), 7.94 – 7.91 (m, 1H), 7.85 (d,  $J = 6.4$  Hz, 2H), 7.43 – 7.39 (m, 1H), 7.36 – 7.32 (m, 1H), 4.36 (d,  $J = 11.1$  Hz, 1H), 4.04 (dd,  $J = 11.1, 1.1$  Hz, 1H), 3.17 – 3.11 (m, 1H), 3.08 – 2.98 (m, 1H), 2.83 (s, 3H), 2.54 – 2.48 (m, 1H), 2.08 (s, 3H), 1.83 (dt,  $J = 11.8, 2.0$  Hz, 2H), 1.79 – 1.67 (m, 2H), 1.61 – 1.57 (m, 2H), 1.56 – 1.51 (m, 1H), 1.28 (s, 3H), 1.15 – 1.10 (m, 1H), 1.07 (s, 3H).

$^{13}\text{C}$  NMR (126 MHz,  $\text{CDCl}_3$ )  $\delta$  171.4, 170.0, 145.9, 138.9, 136.9, 134.9, 126.9, 126.8, 124.8, 123.6, 119.4, 116.3, 116.2, 115.5, 67.0, 51.4, 39.3, 38.0, 37.2, 36.0, 31.9, 27.6, 27.4, 26.1, 21.0, 19.4, 19.0.

IR (film):  $\nu_{\text{max}}$  2950, 2580, 1740, 1675, 1593, 1235, 1167, 956, 750  $\text{cm}^{-1}$ .

HRMS (ESI-TOF)  $m/z$ :  $[\text{M} + \text{H}]^+$  calcd. for  $[\text{C}_{27}\text{H}_{31}\text{O}_3\text{N} + \text{H}]^+$  418.2377; found 418.2403.

$[\alpha]_{589}^{25} = +18.17$  ( $c = 0.4$ ,  $\text{CHCl}_3$ ).

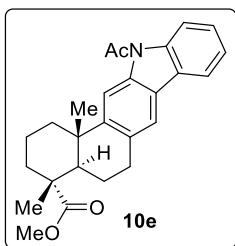

(4*R*,4*aR*,13*bS*)-methyl 12-acetyl-4,13*b*-dimethyl-2,3,4,4*a*,5,6,12,13*b*-octahydro-1*H*-naphtho[1,2-*b*]carbazole-4-carboxylate [10e]: 10e was obtained as white foam (0.02 mmol scale of reaction; 68% yield).  $R_f = 0.5$  (10% EtOAc in *n*-hexane).

$^1\text{H}$  NMR (500 MHz,  $\text{CDCl}_3$ ):  $\delta$  8.21 (s, 1H), 8.15 (d,  $J = 8.4$  Hz, 1H), 7.94 (dd,  $J = 7.8$ , 1.4 Hz, 1H), 7.66 (s, 1H), 7.47 (d,  $J = 1.4$  Hz, 1H), 7.37 (td,  $J = 7.5$ , 1.0 Hz, 1H), 3.71 (s, 3H), 3.12 – 3.08 (m, 2H), 2.89 (s, 3H), 2.49 (d,  $J = 12.7$  Hz, 1H), 2.40 – 2.33 (m, 2H), 1.99 – 1.94 (m, 1H), 1.84 – 1.81 (m, 2H), 1.67 (d,  $J = 7.2$  Hz, 2H), 1.53 (d,  $J = 9.5$  Hz, 1H), 1.35 (s, 3H), 1.33 (s, 3H).

$^{13}\text{C}$  NMR (125 MHz,  $\text{CDCl}_3$ ):  $\delta$  179.1, 170, 137.7, 131.1, 126.8, 126.5, 124.3, 123.6, 119.7, 119.6, 116.1, 112.1, 52, 47.7, 44.9, 38.5, 38.1, 36.7, 29.9, 27.7, 25.4, 21.7, 18.6, 16.6.

IR (neat)  $\nu_{\text{max}}$  3437, 2906, 1746, 1651, 1446, 1225, 1023, 834, 714, 546  $\text{cm}^{-1}$ .

**HRMS** (ESI)  $m/z$ :  $[M + H]^+$  calcd. for  $[C_{26}H_{29}NO_3 + H]^+$  404.2226, found 404.2212.

$[\alpha]^{25}_{589} = +51.6$  ( $c = 0.3$ ,  $CHCl_3$ ).

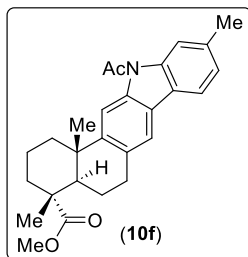

(4*R*,4*aR*,13*bS*) Methyl -12-acetyl-4,10,13*b*-trimethyl-2,3,4,4*a*,5,6,12,13*b*-octahydro-1*H*-naphtho[1,2-*b*]carbazole-4-carboxylate [(10*f*): 10*f* was obtained as yellow foam (0.06 mmol scale of reaction; 72% yield).  $R_f = 0.4$  (10% EtOAc in *n*-hexane).

**$^1H$  NMR** (500 MHz,  $CDCl_3$ ):  $\delta$  8.12 (s, 1H), 7.95 (s, 1H), 7.77 (d,  $J = 7.8$  Hz, 1H), 7.57 (s, 1H), 7.15 (ddd,  $J = 7.8, 1.3, 0.6$  Hz, 1H), 3.68 (d,  $J = 0.9$  Hz, 3H), 3.06 (dd,  $J = 9.2, 4.8$  Hz, 2H), 2.84 (d,  $J = 0.8$  Hz, 3H), 2.51 (s, 3H), 2.42 (d,  $J = 1.8$  Hz, 2H), 2.32 – 2.28 (m, 1H), 1.91 (t,  $J = 9.1$  Hz, 1H), 1.83 – 1.77 (m, 3H), 1.71 – 1.63 (m, 2H), 1.31 (s, 3H), 1.29 (s, 3H).

**$^{13}C$  NMR** (125 MHz,  $CDCl_3$ ):  $\delta$  179.2, 170.1, 149.1, 139.5, 137.7, 137.1, 131, 124.8, 124.5, 124.2, 119.4, 119.4, 116.7, 112.1, 52.1, 47.8, 45.1, 38.6, 38.2, 36.8, 27.8, 25.5, 22.4, 21.8, 18.7, 16.7.

**IR** (neat):  $\nu_{max}$  3437, 2906, 1746, 1651, 1446, 1225, 1023, 834, 714, 546  $cm^{-1}$ .

**HRMS** (ESI)  $m/z$ :  $[M + H]^+$  calcd. for  $[C_{27}H_{31}NO_3 + H]^+$  418.2382, found 418.2375.

$[\alpha]^{25}_{589} = +55.6$  ( $c = 0.3$ ,  $CHCl_3$ ).

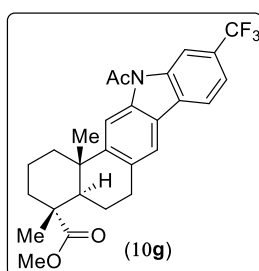

(4*R*,4*aR*,13*bS*)- Methyl 12-acetyl-4,13*b*-dimethyl-10-(trifluoromethyl)-2,3,4,4*a*,5,6,12,13*b*-octahydro-1*H*-naphtho[1,2-*b*]carbazole-4-carboxylate [(10*g*)]: **10g** was obtained as yellow foam (8.63 mmol scale of reaction; 65% yield).  $R_f = 0.5$  (10% EtOAc in *n*-hexane).

$^1\text{H NMR}$  (500 MHz,  $\text{CDCl}_3$ ):  $\delta$  8.55 (s, 1H), 8.04 (s, 1H), 7.98 (dt,  $J = 8.0, 0.7$  Hz, 1H), 7.68 (d,  $J = 1.1$  Hz, 1H), 7.60 (ddd,  $J = 8.1, 1.6, 0.7$  Hz, 1H), 3.68 (s, 3H), 3.11 – 3.06 (m, 2H), 2.88 (s, 3H), 2.43 (d,  $J = 12.2$  Hz, 1H), 2.31 (dd,  $J = 12.5, 2.4$  Hz, 1H), 1.98 – 1.83 (m, 2H), 1.80 (q,  $J = 4.2, 3.3$  Hz, 2H), 1.78 – 1.67 (m, 2H), 1.66 – 1.59 (m, 1H), 1.32 (s, 3H), 1.30 – 1.29 (m, 3H).

$^{13}\text{C NMR}$  (125 MHz,  $\text{CDCl}_3$ ):  $\delta$  179, 169.9, 151, 138.7, 138.3, 131.6, 129, 123.3, 120.7, 120.6, 120.6, 119.8, 111.8, 52.1, 47.8, 44.9, 38.6, 38.3, 36.7, 29.8, 27.8, 25.5, 21.7, 18.7, 16.7.

$^{19}\text{F NMR}$  (376 MHz,  $\text{CDCl}_3$ )  $\delta$  -61.10

**IR** (neat)  $\nu_{\text{max}}$  3437, 2906, 1746, 1651, 1446, 1225, 1023, 834, 714, 546  $\text{cm}^{-1}$ .

**HRMS** (ESI)  $m/z$ :  $[\text{M} + \text{H}]^+$  calcd. for  $[\text{C}_{27}\text{H}_{28}\text{F}_3\text{NO}_3 + \text{H}]^+$  472.2100, found 472.2108.

$[\alpha]_{\text{D}}^{25} = +54.6$  ( $c = 0.3$ ,  $\text{CHCl}_3$ ).

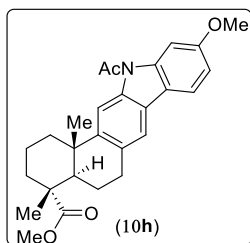

(4*R*,4*aR*,13*bS*)- Methyl -12-acetyl-10-methoxy-4,13*b*-dimethyl-2,3,4,4*a*,5,6,12,13*b*-octahydro-1*H*-naphtho[1,2-*b*]carbazole-4-carboxylate [(10*h*)]: **10h** was obtained as yellow foam (8.63 mmol scale of reaction; 60% yield).  $R_f = 0.35$  (10% EtOAc in *n*-hexane).

$^1\text{H NMR}$  (500 MHz,  $\text{CDCl}_3$ ):  $\delta$  7.99 (s, 1H), 7.82 (s, 1H), 7.76 (dd,  $J = 8.5, 0.5$  Hz, 1H), 7.52 (s, 1H), 6.94 – 6.91 (m, 1H), 3.90 (s, 3H), 3.68 (s, 3H), 3.07 – 3.03 (m, 2H), 2.83 (d,  $J = 0.5$  Hz, 3H), 2.44 – 2.40 (m, 2H), 2.32 – 2.28 (m, 1H), 1.90 (s, 1H), 1.80 (d,  $J = 11.3$  Hz, 2H), 1.76 (d,  $J = 3.0$  Hz, 1H), 1.65 (s, 1H), 1.61 (s, 1H), 1.31 (s, 3H), 1.28 (s, 3H).

$^{13}\text{C}$  NMR (125 MHz,  $\text{CDCl}_3$ ):  $\delta$  179.2, 170.1, 165.1, 159.5, 148.2, 140.5, 131, 120, 119, 111, 102.3, 55.9, 52.1, 47.8, 45.1, 38.6, 38.1, 36.7, 27.8, 25.5, 21.8, 18.7, 16.7.

IR (neat):  $\nu_{\text{max}}$  3437, 2906, 1746, 1651, 1446, 1225, 1023, 834, 714, 546  $\text{cm}^{-1}$ .

HRMS (ESI)  $m/z$ :  $[\text{M} + \text{H}]^+$  calcd. for  $[\text{C}_{27}\text{H}_{31}\text{NO}_4 + \text{H}]^+$  434.2331, found 434.2339.

$[\alpha]_D^{25} = +55.6$  ( $c = 0.3$ ,  $\text{CHCl}_3$ ).

### Synthesis of compound (+)-5:

For the synthesis of compound (+)-5 see ref. 1.

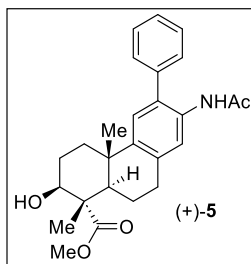

**Methyl (1*S*,2*S*,4*aS*,10*aR*)-7-acetamido-2-hydroxy-1,4*a*-dimethyl-6-phenyl-1,2,3,4,4*a*,9,10,10*a*-octahydrophenanthrene-1-carboxylate [(+)-5]:** (+)-5 was obtained as white foam. (0.473 mmol scale of reaction; 183 mg; 92% yield);  $R_f = 0.25$  (50% EtOAc in *n*-hexane).

$^1\text{H}$  NMR (500 MHz,  $\text{CDCl}_3$ ):  $\delta$  7.89 (s, 1H), 7.49 (t,  $J = 7.5$  Hz, 2H), 7.42 (t,  $J = 7.4$  Hz, 1H), 7.38 – 7.33 (m, 2H), 7.11 (s, 1H), 7.06 (s, 1H), 4.04 (dd,  $J = 11.6, 4.7$  Hz, 1H), 3.75 (s, 3H), 3.05 – 2.88 (m, 2H), 2.30 (dt,  $J = 13.2, 3.5$  Hz, 1H), 2.16 (dd,  $J = 12.5, 2.2$  Hz, 1H), 2.02 (s, 3H), 1.98 – 1.91 (m, 1H), 1.87 (dt,  $J = 10.9, 4.2$  Hz, 1H), 1.79 (qd,  $J = 13.1, 3.3$  Hz, 1H), 1.70 – 1.62 (m, 1H), 1.49 – 1.43 (m, 1H), 1.27 (s, 3H), 1.24 (s, 3H).

$^{13}\text{C}$  NMR (125 MHz,  $\text{CDCl}_3$ ):  $\delta$  177.7, 168.4, 145.2, 138.5, 135.3, 132.1, 130.6, 129.3, 129.0, 127.8, 126.2, 122.2, 75.1, 53.7, 52.3, 45.5, 36.8, 36.6, 30.0, 27.2, 25.2, 24.5, 21.3, 10.7.

IR (neat):  $\nu_{\text{max}}$  3286, 2971, 2698, 1837, 1749, 1596, 1191, 1083, 909  $\text{cm}^{-1}$ .



$[\alpha]^{25}_{589} = +67.00$  ( $c = 0.71$ , CH<sub>3</sub>OH).

For the synthesis of compound (+)-**5** see ref. 1.

### Synthesis of compound (+)-**5a**:

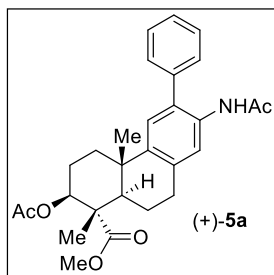

**Methyl** (1*S*,2*S*,4*aS*,10*aR*)-7-acetamido-2-acetoxy-1,4*a*-dimethyl-6-phenyl-1,2,3,4,4*a*,9,10,10*a*-octahydrophenanthrene-1-carboxylate [(+)-**5a**]: (+)-**5a** was obtained as white foam. (0.513 mmol scale of reaction; 228 mg; 96% yield);  $R_f = 0.2$  (30% EtOAc in *n*-hexane).

**<sup>1</sup>H NMR** (500 MHz, CDCl<sub>3</sub>):  $\delta$  7.89 (s, 1H), 7.48 (t,  $J = 7.4$  Hz, 2H), 7.41 (t,  $J = 7.4$  Hz, 1H), 7.37 – 7.33 (m, 2H), 7.09 (d,  $J = 8.3$  Hz, 2H), 5.23 (dd,  $J = 11.6, 4.5$  Hz, 1H), 3.69 (s, 3H), 3.03 – 2.88 (m, 2H), 2.32 (dt,  $J = 13.2, 3.3$  Hz, 1H), 2.27 (dd,  $J = 12.6, 2.3$  Hz, 1H), 2.02 (s, 6H), 1.99 – 1.91 (m, 2H), 1.84 – 1.71 (m, 2H), 1.41 (dq,  $J = 11.5, 4.2, 2.8, 2.1$  Hz, 1H), 1.32 (s, 3H), 1.26 (s, 3H).

**<sup>13</sup>C NMR** (125 MHz, CDCl<sub>3</sub>):  $\delta$  176.3, 170.1, 168.4, 144.9, 138.5, 135.2, 132.1, 130.7, 129.3, 129.0, 127.8, 126.1, 122.2, 77.3, 52.4, 52.1, 45.6, 36.7, 36.3, 29.9, 25.1, 24.5, 24.0, 21.1, 21.0, 11.7.

**IR** (neat):  $\nu_{\max}$  2971, 2755, 1816, 1739, 1627, 1201, 1069, 981 cm<sup>-1</sup>.

**HRMS** (ESI)  $m/z$ :  $[M+H]^+$  calcd. for [C<sub>27</sub>H<sub>33</sub>O<sub>5</sub>N + H]<sup>+</sup> 464.2437, found 464.2426.

$[\alpha]^{25}_{589} = +95.10$  ( $c = 0.91$ , CH<sub>3</sub>OH).

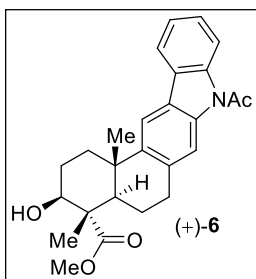

**Methyl** (3*S*,4*S*,4*aR*,13*bS*)-8-acetyl-3-hydroxy-4,13*b*-dimethyl-2,3,4,4*a*,5,6,8,13*b*-octahydro-1*H*-naphtho[2,1-*b*]carbazole-4-carboxylate [(+)-6]: (+)-6 was obtained as yellow oil (0.39 mmol scale of reaction; 154 mg; 94%).  $R_f = 0.3$  (40 % EtOAc in *n*-hexane).

**$^1\text{H NMR}$**  (500 MHz,  $\text{CDCl}_3$ ):  $\delta$  8.19 (d,  $J = 8.3$  Hz, 1H), 7.96 (d,  $J = 7.7$  Hz, 1H), 7.89 (s, 1H), 7.86 (d,  $J = 2.2$  Hz, 1H), 7.46 (t,  $J = 7.9$  Hz, 1H), 7.41 – 7.35 (m, 1H), 4.17 – 4.09 (m, 1H), 3.77 (d,  $J = 2.3$  Hz, 3H), 3.12 (qd,  $J = 17.1, 7.8$  Hz, 2H), 2.86 (d,  $J = 2.3$  Hz, 3H), 2.56 (dd,  $J = 12.8, 3.1$  Hz, 1H), 2.22 – 2.17 (m, 1H), 2.05 – 1.95 (m, 2H), 1.90 (d,  $J = 12.6$  Hz, 1H), 1.80 (t,  $J = 13.2$  Hz, 1H), 1.58 – 1.50 (m, 1H), 1.32 (t,  $J = 2.8$  Hz, 6H).

**$^{13}\text{C NMR}$**  (125 MHz,  $\text{CDCl}_3$ ):  $\delta$  177.7, 170.0, 145.0, 138.9, 137.1, 134.8, 126.9, 126.7, 124.8, 123.6, 119.4, 116.3, 116.3, 115.3, 75.2, 53.7, 52.3, 45.6, 37.2, 37.0, 31.1, 27.7, 27.3, 25.6, 21.4, 10.8.

**IR** (neat):  $\nu_{\text{max}}$  3341, 2837, 1642, 1517, 1483, 1357, 889  $\text{cm}^{-1}$ .

**HRMS** (ESI)  $m/z$ :  $[\text{M} + \text{Na}]^+$  calcd. for  $[\text{C}_{26}\text{H}_{29}\text{O}_4\text{N} + \text{Na}]^+$  442.1989, found 442.2019.

$[\alpha]_{589}^{25} = +83.78$  ( $c = 0.53$ ,  $\text{CHCl}_3$ ).

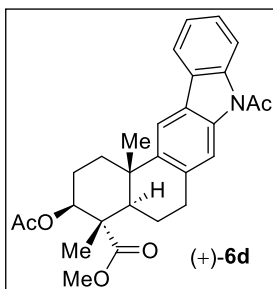

**Methyl (3*S*,4*S*,4*aR*,13*bS*)-3-acetoxy-8-acetyl-4,13*b*-dimethyl-2,3,4,4*a*,5,6,8,13*b*-octahydro-1*H*-naphtho[2,1-*b*]carbazole-4-carboxylate [(+)-6*d*]:** (+)-6*d* was obtained as light yellow foam (0.43 mmol scale of reaction; 189 mg; 95% yield).  $R_f = 0.34$  (30 % EtOAc in *n*-hexane).

**$^1\text{H NMR}$**  (500 MHz,  $\text{CDCl}_3$ ):  $\delta$  8.18 (d,  $J = 8.4$  Hz, 1H), 7.97 (d,  $J = 7.6$  Hz, 1H), 7.90 (s, 1H), 7.85 (s, 1H), 7.49 – 7.44 (m, 1H), 7.38 (t,  $J = 7.4$  Hz, 1H), 5.29 (dd,  $J = 11.3, 4.5$  Hz, 1H), 3.71 (s, 3H), 3.18 – 3.06 (m, 2H), 2.87 (s, 3H), 2.61 – 2.55 (m, 1H), 2.33 (dd,  $J = 12.6, 2.4$  Hz, 1H), 2.09 (d,  $J = 8.0$  Hz, 1H), 2.05 (s, 3H), 2.04 – 1.97 (m, 1H), 1.90 (tt,  $J = 15.0, 7.5$  Hz, 2H), 1.51 – 1.46 (m, 1H), 1.37 (s, 3H), 1.34 (s, 3H).

**$^{13}\text{C NMR}$**  (125 MHz,  $\text{CDCl}_3$ ):  $\delta$  176.4, 170.1, 170.0, 144.7, 138.9, 137.2, 134.7, 127.0, 126.7, 124.9, 123.6, 119.5, 116.3, 115.3, 76.8, 52.4, 52.1, 45.7, 37.1, 36.8, 30.9, 27.7, 25.5, 24.1, 21.2, 21.1, 11.8.

**IR** (neat)  $\nu_{\text{max}}$  3242, 2139, 1703, 1665, 1523, 1147, 985, 789  $\text{cm}^{-1}$ .

**HRMS** (ESI)  $m/z$ :  $[\text{M} + \text{Na}]^+$  calcd. for  $[\text{C}_{28}\text{H}_{31}\text{O}_5\text{N} + \text{Na}]^+$  484.2100, found 484.2105.

$[\alpha]_{589}^{25} = +55.30$  ( $c = 0.80$ ,  $\text{CHCl}_3$ ).

**Total synthesis of (+)-xiamycin A methyl ester [(+)-2*b*]:**

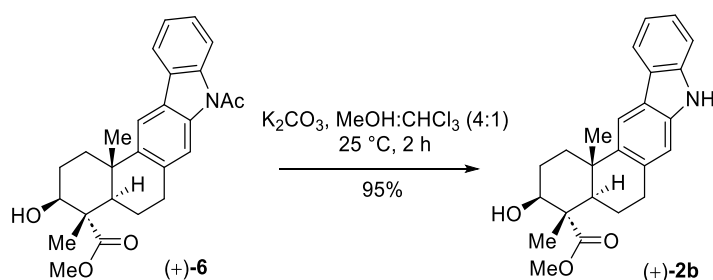

In an oven dried round-bottom flask, (+)-6 (107 mg, 0.255 mmol, 1.0 equiv.) was taken in a mixture of methanol and chloroform [ $\text{MeOH}:\text{CHCl}_3$  (4:1)] solvent (5 mL). To this solution was added  $\text{K}_2\text{CO}_3$  (141 mg, 1.02 mmol, 4.0 equiv.) at  $25\text{ }^\circ\text{C}$  and stirring was continued for an additional 2 h. After completion of the reaction (judged by TLC analysis), the reaction mixture was diluted with water (3 mL). Next, it was extracted with dichloromethane (5 mL X 2). The

organic layers were dried over Na<sub>2</sub>SO<sub>4</sub> and concentrated on a rotary evaporator under reduced pressure. Next, the crude methyl ester was purified by flash column chromatography with 30% EtOAc in *n*-hexane to afford the naturally occurring xiamycin A methylester (+)-**2b** as a white foam (91.4 mg, 95% yield).

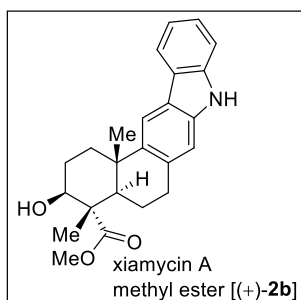

**Methyl (3*S*,4*S*,4*a**R*,13*b**S*)-3-hydroxy-4,13*b*-dimethyl-2,3,4,4*a*,5,6,8,13*b*-octahydro-1*H*-naphtho[2,1-*b*]carbazole-4-carboxylate [(+)-**2b**]:** Natural product xiamycin A methylester (+)-**2b** was obtained as white foam (0.255 mmol scale, 91.4 mg, 95% yield).  $R_f = 0.2$  (30% EtOAc in *n*-hexane)

**<sup>1</sup>H NMR** (500 MHz, CDCl<sub>3</sub>):  $\delta$  8.00 (d,  $J = 7.8$  Hz, 1H), 7.92 (s, 1H), 7.86 (s, 1H), 7.37 – 7.34 (m, 2H), 7.21 – 7.16 (m, 1H), 7.04 (s, 1H), 4.12 – 4.06 (m, 1H), 3.74 (s, 3H), 3.12 – 3.03 (m, 2H), 2.60 – 2.54 (m, 1H), 2.22 (dd,  $J = 12.5, 2.4$  Hz, 1H), 2.04 – 1.92 (m, 2H), 1.89 – 1.79 (m, 2H), 1.48 (ddt,  $J = 13.3, 6.0, 2.9$  Hz, 1H), 1.30 (s, 6H).

**<sup>13</sup>C NMR** (125 MHz, CDCl<sub>3</sub>):  $\delta$  178.0, 141.1, 140.1, 138.3, 133.5, 125.5, 123.6, 122.1, 120.0, 119.3, 115.7, 110.6, 109.9, 75.4, 53.9, 52.4, 46.0, 37.5, 37.3, 30.9, 27.5, 25.9, 21.6, 10.8.

**IR** (neat):  $\nu_{\max}$  3375, 2917, 2863, 1705, 1586, 1442, 1211, 911, 797 cm<sup>-1</sup>.

**HRMS** (ESI)  $m/z$ : [M+ H]<sup>+</sup> calcd. for [C<sub>24</sub>H<sub>27</sub>O<sub>3</sub>N + H]<sup>+</sup> 378.2069, found 378.2070.

$[\alpha]_{D}^{25} = +110.3$  ( $c = 0.67$ , CH<sub>3</sub>OH); lit.<sup>[3]</sup>  $[\alpha]_{D}^{21} = +162.4$  ( $c = 1.3$ , CH<sub>3</sub>OH).

**Total synthesis of xiamycin A [(+)-**2a**]:**

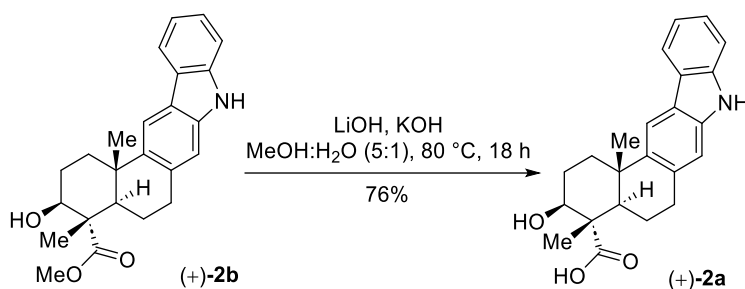

In an oven dried round-bottom flask xiamycin A methyl ester [(+)-**2b**] (47 mg, 0.125 mmol, 1.0 equiv.) was taken in a mixture of methanol and water [MeOH: H<sub>2</sub>O (5:1)] at 25 °C. Next, KOH (210 mg, 3.74 mmol, 30 equiv.) and LiOH (60 mg, 2.5 mmol, 20 equiv.) were added subsequently and the reaction mixture was heated under reflux at 80 °C. After completion of the reaction as confirmed by TLC analysis (18 h), the reaction mixture was quenched with 6(*N*) HCl at 0 °C and the pH of the reaction mixture was adjusted to ~1-2. Then whole reaction mixture was extracted with EtOAc (6 mL X 2). The combined organic layers were collected, dried over Na<sub>2</sub>SO<sub>4</sub> and concentrated under reduced pressure. The crude product was purified by flash column chromatography with ~80-90% EtOAc to afford the naturally occurring xiamycin A [(+)-**2a**] as white foam (34.5 mg, 76% yield).

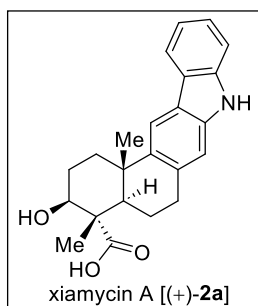

**(3*S*,4*S*,4*aR*,13*bS*)-3-Hydroxy-4,13*b*-dimethyl-2,3,4,4*a*,5,6,8,13*b*-octahydro-1*H*-naphtho[2,1-*b*]carbazole-4-carboxylic acid [(+)-**2a**]:** Natural product xiamycin A [(+)-**2a**] was obtained as white foam (0.125 mmol scale, 34.5 mg, 76% yield).  $R_f = 0.2$  (70% EtOAc in *n*-hexane).

**<sup>1</sup>H NMR** (400 MHz, CD<sub>3</sub>OD):  $\delta$  7.96 (dd,  $J = 7.8, 1.0$  Hz, 1H), 7.92 (s, 1H), 7.35 (dt,  $J = 8.1, 1.0$  Hz, 1H), 7.28 (ddd,  $J = 8.2, 7.0, 1.2$  Hz, 1H), 7.08 (ddd,  $J = 8.0, 7.0, 1.1$  Hz, 1H), 7.04 (s, 1H), 4.14 – 4.04 (m, 1H), 3.12 – 2.94 (m, 2H), 2.60 (dt,  $J = 13.2, 3.4$  Hz, 1H), 2.17 – 2.10 (m, 1H), 1.99 – 1.92 (m, 1H), 1.91 – 1.82 (m, 2H), 1.76 – 1.65 (m, 1H), 1.52 (ddt,  $J = 13.2, 7.2, 2.2$  Hz, 1H), 1.27 (s, 3H), 1.23 (s, 3H).

**$^{13}\text{C}$  NMR** (100 MHz,  $\text{CD}_3\text{OD}$ ):  $\delta$  181.3, 142.0, 141.7, 140.1, 134.0, 126.1, 124.6, 123.1, 120.6, 119.3, 116.3, 111.5, 110.8, 76.3, 54.9, 47.9, 39.0, 38.3, 32.0, 28.6, 26.3, 22.6, 11.4.

**IR** (neat):  $\nu_{\text{max}}$  3352, 2946, 2258, 1673, 1408, 1009, 912, 848  $\text{cm}^{-1}$ .

**HRMS** (ESI)  $m/z$ :  $[\text{M} + \text{Na}]^+$  calcd. for  $[\text{C}_{23}\text{H}_{25}\text{O}_3\text{N} + \text{Na}]^+$  386.1727, found 386.1739.

$[\alpha]^{25}_{589} = +105.8$  ( $c = 0.48$ ,  $\text{CH}_3\text{OH}$ ); lit.<sup>[3]</sup>  $[\alpha]_{\text{D}}^{21} = +137.6$  ( $c = 5.3$ ,  $\text{CH}_3\text{OH}$ ).

**Comparison of  $^1\text{H}$ -NMR Data of (+)-Xiamycin A [(+)-**2a**]** of this report with natural (+)-**2a** by Hertweck<sup>[4]</sup> and with literature by Baran<sup>[5]</sup> and Sarpong<sup>[6]</sup>:

| Hertweck's report on isolation of (+)-Xiamycin A [(+)- <b>2a</b> ]<br>( $^1\text{H}$ -NMR, 300 MHz, $\text{CD}_3\text{OD}$ ) <sup>[4]</sup> |      |       |                          |
|---------------------------------------------------------------------------------------------------------------------------------------------|------|-------|--------------------------|
| $\delta$ (ppm)                                                                                                                              | Int. | mult. | $J$ (Hz)                 |
| 7.96                                                                                                                                        | 1H   | dd    | $J = 7.7, 1.1$ Hz        |
| 7.92                                                                                                                                        | 1H   | s     | -                        |
| 7.34                                                                                                                                        | 1H   | dd    | $J = 8.0, 1.1$ Hz        |
| 7.27                                                                                                                                        | 1H   | ddd   | $J = 8.0, 7.4, 1.1$ Hz   |
| 7.08                                                                                                                                        | 1H   | ddd   | $J = 8.1, 7.3, 1.1$ Hz   |
| 7.05                                                                                                                                        | 1H   | s     | -                        |
| 4.09                                                                                                                                        | 1H   | dd    | $J = 9.1, 7.1$ Hz        |
| 3.09                                                                                                                                        | 1H   | dd    | $J = 16.7, 6.1$          |
| 3.02                                                                                                                                        | 1H   | m     | -                        |
| 2.61                                                                                                                                        | 1H   | td    | $J = 13.1, 3.0$ Hz       |
| 2.15                                                                                                                                        | 1H   | dd    | $J = 12.5, 2.0$ Hz       |
| 2.00                                                                                                                                        | 1H   | ddd   | $J = 13.4, 12.8, 7.0$ Hz |
| 1.89                                                                                                                                        | 2H   | m     | -                        |
| 1.74                                                                                                                                        | 1H   | m     | -                        |
| 1.53                                                                                                                                        | 1H   | m     | -                        |
| 1.29                                                                                                                                        | 3H   | s     | -                        |
| 1.23                                                                                                                                        | 3H   | s     | -                        |

| Baran's Total Synthesis of (+)-Xiamycin A [(+)- <b>2a</b> ] ( <sup>1</sup> H-NMR, 600 MHz, CD <sub>3</sub> OD) <sup>[5]</sup> |      |       |                             |
|-------------------------------------------------------------------------------------------------------------------------------|------|-------|-----------------------------|
| δ (ppm)                                                                                                                       | Int. | mult. | <i>J</i> (Hz)               |
| 7.97                                                                                                                          | 1H   | dt    | <i>J</i> = 7.8, 1.0 Hz      |
| 7.94                                                                                                                          | 1H   | s     | -                           |
| 7.35                                                                                                                          | 1H   | dt    | <i>J</i> = 8.1, 0.9 Hz      |
| 7.29                                                                                                                          | 1H   | ddd   | <i>J</i> = 8.1, 7.1, 1.2 Hz |
| 7.09                                                                                                                          | 1H   | t     | <i>J</i> = 7.9, 7.1, 1.0 Hz |
| 7.06                                                                                                                          | 1H   | s     | -                           |
| 4.10                                                                                                                          | 1H   | dd    | <i>J</i> = 9.3, 7.1 Hz      |
| 3.14 – 3.07                                                                                                                   | 1H   | m     | -                           |
| 3.06 – 2.98                                                                                                                   | 1H   | m     | -                           |
| 2.63                                                                                                                          | 1H   | dt    | <i>J</i> = 13.1, 3.5 Hz     |
| 2.16                                                                                                                          | 1H   | dd    | <i>J</i> = 12.6, 2.2 Hz     |
| 2.01                                                                                                                          | 1H   | tdd   | <i>J</i> = 12.8, 11.3, 6.9  |
| 1.94 – 1.86                                                                                                                   | 2H   | m     | -                           |
| 1.78 – 1.70                                                                                                                   | 1H   | m     | -                           |
| 1.57 – 1.52                                                                                                                   | 1H   | m     | -                           |
| 1.29                                                                                                                          | 3H   | s     | -                           |
| 1.24                                                                                                                          | 3H   | s     | -                           |

| Sarpong's Total Synthesis of (+)-Xiamycin A [(+)- <b>2a</b> ] ( <sup>1</sup> H-NMR, 700 MHz, CD <sub>3</sub> OD) <sup>[6]</sup> |      |       |                   |
|---------------------------------------------------------------------------------------------------------------------------------|------|-------|-------------------|
| δ (ppm)                                                                                                                         | Int. | mult. | <i>J</i> (Hz)     |
| 7.97                                                                                                                            | 1H   | d     | <i>J</i> = 8.0 Hz |
| 7.94                                                                                                                            | 1H   | s     | -                 |
| 7.35                                                                                                                            | 1H   | d     | <i>J</i> = 8.0 Hz |
| 7.29                                                                                                                            | 1H   | t     | <i>J</i> = 7.9 Hz |
| 7.09                                                                                                                            | 1H   | t     | <i>J</i> = 7.5 Hz |
| 7.07                                                                                                                            | 1H   | s     | -                 |

|           |    |    |                    |
|-----------|----|----|--------------------|
| 4.10      | 1H | dd | $J = 10.5, 7.5$ Hz |
| 3.15-3.08 | 1H | m  | -                  |
| 3.08-2.99 | 1H | m  | -                  |
| 2.64      | 1H | d  | $J = 12.8$ Hz      |
| 2.14      | 1H | d  | $J = 11.8$ Hz      |
| 2.08-1.98 | 1H | m  | -                  |
| 1.93-1.88 | 2H | m  | -                  |
| 1.78-1.72 | 1H | m  | -                  |
| 1.58-1.53 | 1H | m  | -                  |
| 1.30      | 3H | s  | -                  |
| 1.25      | 3H | s  | -                  |

| This Synthesis: (+)-Xiamycin A [(+)-2a]<br>( <sup>1</sup> H-NMR, 400 MHz, CD <sub>3</sub> OD) |      |       |                         |
|-----------------------------------------------------------------------------------------------|------|-------|-------------------------|
| $\delta$ (ppm)                                                                                | Int. | mult. | $J$ (Hz)                |
| 7.96                                                                                          | 1H   | dd    | $J = 7.8, 1.0$ Hz       |
| 7.92                                                                                          | 1H   | s     | -                       |
| 7.35                                                                                          | 1H   | dt    | $J = 8.1, 1.0$ Hz       |
| 7.28                                                                                          | 1H   | ddd   | $J = 8.2, 7.0, 1.2$ Hz  |
| 7.08                                                                                          | 1H   | ddd   | $J = 8.0, 7.0, 1.1$ Hz  |
| 7.04                                                                                          | 1H   | s     | -                       |
| 4.14 – 4.04                                                                                   | 1H   | m     | -                       |
| 3.12 – 2.94                                                                                   | 2H   | m     | -                       |
| 2.60                                                                                          | 1H   | dt    | $J = 13.2, 3.4$ Hz      |
| 2.17 – 2.10                                                                                   | 1H   | m     | -                       |
| 1.99 – 1.92                                                                                   | 1H   | m     | -                       |
| 1.91 – 1.82                                                                                   | 2H   | m     | -                       |
| 1.76 – 1.65                                                                                   | 1H   | m     | -                       |
| 1.52                                                                                          | 1H   | ddt   | $J = 13.2, 7.2, 2.2$ Hz |
| 1.27                                                                                          | 3H   | s     | -                       |
| 1.23                                                                                          | 3H   | s     | -                       |



**Comparison of <sup>13</sup>C-NMR Data:**

| Hertweck's isolation of (+)-Xiamycin A [(+)- <b>2a</b> ] ( <sup>13</sup> C-NMR, 125.77 MHz, CD <sub>3</sub> OD) <sup>[4]</sup> | Baran's Synthesis: (+)-Xiamycin A [(+)- <b>2a</b> ] ( <sup>13</sup> C-NMR, 151 MHz, CD <sub>3</sub> OD) <sup>[5]</sup> | Sarpong's Synthesis: (+)-Xiamycin A [(+)- <b>2a</b> ] ( <sup>13</sup> C-NMR, 176 MHz, CD <sub>3</sub> OD) <sup>[6]</sup> | This Synthesis: (+)-Xiamycin A [(+)- <b>2a</b> ] ( <sup>13</sup> C-NMR, 100 MHz, CD <sub>3</sub> OD) |
|--------------------------------------------------------------------------------------------------------------------------------|------------------------------------------------------------------------------------------------------------------------|--------------------------------------------------------------------------------------------------------------------------|------------------------------------------------------------------------------------------------------|
| 181.3                                                                                                                          | 181.4                                                                                                                  | 181.3                                                                                                                    | 181.3                                                                                                |
| 142.0                                                                                                                          | 142.0                                                                                                                  | 142.0                                                                                                                    | 142.0                                                                                                |
| 141.8                                                                                                                          | 141.8                                                                                                                  | 141.8                                                                                                                    | 141.7                                                                                                |
| 140.1                                                                                                                          | 140.1                                                                                                                  | 140.1                                                                                                                    | 140.1                                                                                                |
| 134.0                                                                                                                          | 134.0                                                                                                                  | 134.0                                                                                                                    | 134.0                                                                                                |
| 126.0                                                                                                                          | 126.1                                                                                                                  | 126.0                                                                                                                    | 126.1                                                                                                |
| 124.7                                                                                                                          | 124.7                                                                                                                  | 124.6                                                                                                                    | 124.6                                                                                                |
| 123.1                                                                                                                          | 123.1                                                                                                                  | 123.1                                                                                                                    | 123.1                                                                                                |
| 120.5                                                                                                                          | 120.6                                                                                                                  | 120.6                                                                                                                    | 120.6                                                                                                |
| 119.3                                                                                                                          | 119.3                                                                                                                  | 119.3                                                                                                                    | 119.3                                                                                                |
| 116.3                                                                                                                          | 116.4                                                                                                                  | 116.4                                                                                                                    | 116.3                                                                                                |
| 111.5                                                                                                                          | 111.4                                                                                                                  | 111.4                                                                                                                    | 111.5                                                                                                |
| 110.8                                                                                                                          | 110.8                                                                                                                  | 110.8                                                                                                                    | 110.8                                                                                                |
| 76.3                                                                                                                           | 76.3                                                                                                                   | 76.3                                                                                                                     | 76.3                                                                                                 |
| 54.9                                                                                                                           | 54.9                                                                                                                   | 54.9                                                                                                                     | 54.9                                                                                                 |
| 47.9                                                                                                                           | 47.9                                                                                                                   | 47.9                                                                                                                     | 47.9                                                                                                 |
| 39.0                                                                                                                           | 39.0                                                                                                                   | 39.0                                                                                                                     | 39.0                                                                                                 |
| 38.3                                                                                                                           | 38.3                                                                                                                   | 38.3                                                                                                                     | 38.3                                                                                                 |
| 32.0                                                                                                                           | 32.0                                                                                                                   | 32.1                                                                                                                     | 32.0                                                                                                 |
| 28.6                                                                                                                           | 28.6                                                                                                                   | 28.7                                                                                                                     | 28.6                                                                                                 |
| 26.3                                                                                                                           | 26.3                                                                                                                   | 26.3                                                                                                                     | 26.3                                                                                                 |
| 22.6                                                                                                                           | 22.6                                                                                                                   | 22.6                                                                                                                     | 22.6                                                                                                 |
| 11.4                                                                                                                           | 11.4                                                                                                                   | 11.4                                                                                                                     | 11.4                                                                                                 |

Synthesis of *bis*-nitro Compound (**13**) *via* sequential Suzuki-Miyaura Coupling: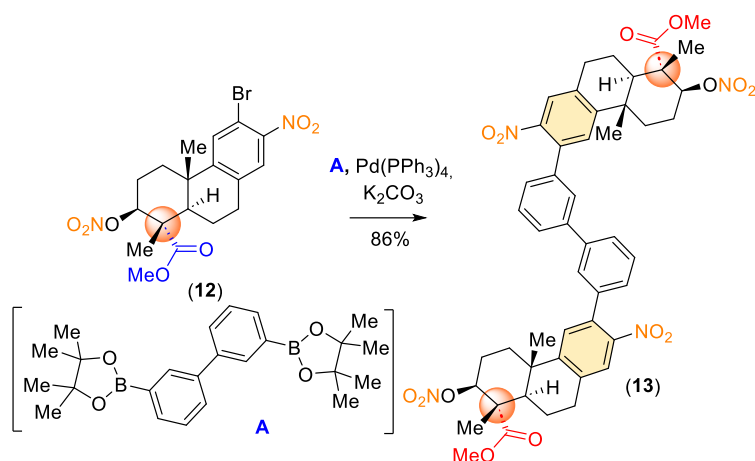

A round-bottom flask was charged with (+)-**12** (113 mg, 0.249 mmol, 1.0 equiv.) and 3,3'-bis(4,4,5,5-tetramethyl-1,3,2-dioxaborolan-2-yl)-1,1'-biphenyl (51 mg, 0.125 mmol, 0.5 equiv.) in a mixture of benzene (3 mL), EtOH (1 mL), and water (1 mL) at room temperature under argon atmosphere. Next, potassium carbonate (34 mg, 0.496 mmol, 2.0 equiv.) was added to the reaction mixture followed by the addition of catalyst, tetrakis(triphenylphosphine)palladium(0) (7 mg, 0.006 mmol, 0.02 equiv.) at the same temperature. Then the reaction mixture was placed on a pre-heated oil bath maintaining temperature of 80 °C. Upon completion of the reaction (3 h), as monitored by TLC analysis, it was extracted with EtOAc (10 mL X 2). The combined organic layers were washed with brine (5 mL X 1) and dried over Na<sub>2</sub>SO<sub>4</sub> and concentrated in a rotary evaporator under reduced pressure. The crude product was purified by flash chromatography with 15% EtOAc in *n*-hexane to furnish (+)-**13** as a white foam (97 mg, 86% yield).

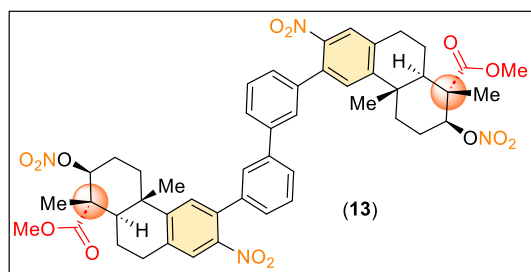

**Dimethyl 6,6'-([1,1'-biphenyl]-3,3'-diyl)(1*S*,1'*S*,2*S*,2'*S*,4*aS*,4*a*'*S*,10*aR*,10*a*'*R*)-bis(1,4a-dimethyl-7-nitro-2-(nitrooxy)-1,2,3,4,4a,9,10,10a-octahydrophenanthrene-1-carboxylate) [(+)-**13**]:** (+)-**13** was obtained as yellowish foam (0.249 mmol scale of reaction; 97 mg; 86%). *R<sub>f</sub>* = 0.55 (20 % EtOAc in *n*-hexane).

**$^1\text{H}$  NMR** (500 MHz,  $\text{CDCl}_3$ ):  $\delta$  7.60 (d,  $J$  = 9.2 Hz, 2H), 7.50 – 7.46 (m, 2H), 7.30 (s, 1H), 7.28 – 7.25 (m, 1H), 5.45 (dd,  $J$  = 11.8, 4.3 Hz, 1H), 3.74 (d,  $J$  = 1.9 Hz, 3H), 3.04 (d,  $J$  = 6.7 Hz, 1H), 2.97 (td,  $J$  = 10.7, 5.4 Hz, 1H), 2.47 (dt,  $J$  = 13.3, 3.3 Hz, 1H), 2.22 (dd,  $J$  = 12.5, 2.2 Hz, 1H), 2.14 (tdd,  $J$  = 9.5, 6.0, 4.1 Hz, 1H), 2.05 – 1.92 (m, 2H), 1.83 (ddd,  $J$  = 13.7, 11.3, 3.7 Hz, 1H), 1.51 (ddd,  $J$  = 13.2, 6.5, 2.8 Hz, 1H), 1.33 (d,  $J$  = 2.6 Hz, 3H), 1.29 (s, 3H).

**$^{13}\text{C}$  NMR** (125 MHz,  $\text{CDCl}_3$ ):  $\delta$  152.8, 146.9, 141.1, 138.4, 135.6, 134.1, 129.1, 128.4, 127.2, 127.0, 124.8, 85.5, 52.9, 51.4, 46.2, 37.5, 37.6, 36.0, 29.3, 24.9, 22.6, 20.3, 11.7.

**IR** (neat):  $\nu_{\text{max}}$  3337, 2851, 1743, 1632, 1383, 1211, 935, 756  $\text{cm}^{-1}$ .

**HRMS** (ESI)  $m/z$ :  $[\text{M} + \text{NH}_4]^+$  calcd. for  $[\text{C}_{48}\text{H}_{50}\text{N}_4\text{O}_{14} + \text{NH}_4]^+$  924.3667, found 924.3669.

$[\alpha]_{589}^{25} = +94.5$  ( $c = 0.2$ ,  $\text{CHCl}_3$ ).

**Synthesis of *bis*-acetenalide compound (14) via reduction followed by acetyl protection from compound (13):**

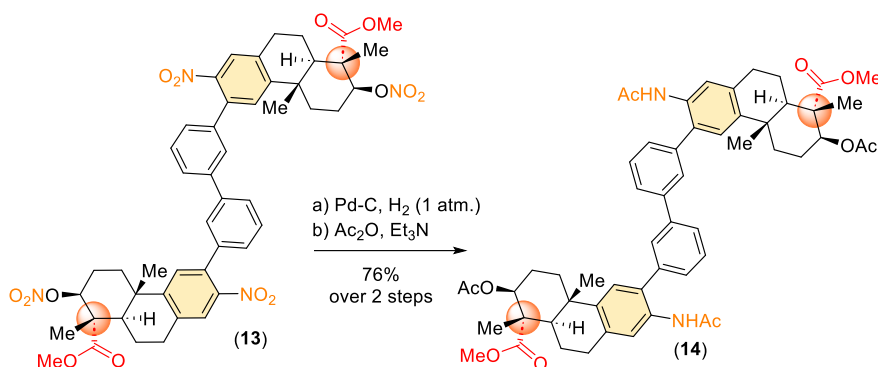

In an oven-dried round-bottom flask *bis*-nitro compound (+)-**13** (80 mg, 0.088 mmol, 1.0 equiv.) was taken in MeOH (5 mL) and degassed with  $\text{N}_2$  balloon for 10 minutes. To this solution Pd/C (20% w/w) (22 mg) was added and a  $\text{H}_2$  gas balloon (1 atm.) was placed with the reaction vessel and stirring continued until the full consumption of starting material (4 h), as confirmed by TLC analysis. The reaction mixture was filtered, evaporated to dryness under the reduced pressure. The crude *bis*-aniline was charged for the next step without further purification.

In an oven dried round-bottom flask *bis*-aniline was taken in CH<sub>2</sub>Cl<sub>2</sub> (3 mL) and Et<sub>3</sub>N (49 μL, 0.361 mmol., 4.1 equiv.) was added to the reaction mixture. Next, acetic anhydride (34 μL, 0.361 mmol., 4.1 equiv.) and DMAP (4 mg, 0.0361 mmol., 0.4 equiv.) was added to the reaction mixture at 25 °C and stirring continued until the full consumption of starting material. Upon completion (6 h), as monitored by TLC analysis, it was extracted with CH<sub>2</sub>Cl<sub>2</sub> (5 mL X 2). The organic layers were dried over Na<sub>2</sub>SO<sub>4</sub> and concentrated in a rotary evaporator under reduced pressure. The crude product was purified by flash column chromatography with 60-80% EtOAc in *n*-hexane to afford (+)-**14** as yellow foam (62 mg, 76% over 2 steps).

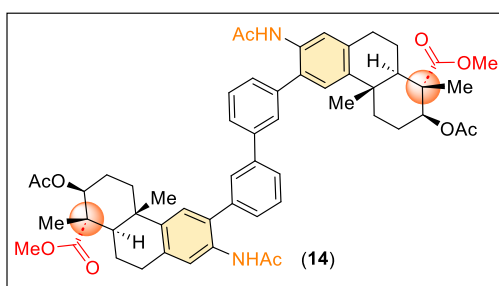

**Dimethyl 6,6'-([1,1'-biphenyl]-3,3'-diyl)(1*S*,1'*S*,2*S*,2'*S*,4*aS*,4*a*'*S*,10*aR*,10*a*'*R*)-bis(7-acetamido-2-acetoxy-1,4*a*-dimethyl-1,2,3,4,4*a*,9,10,10*a*-octahydrophenanthrene-1-carboxylate) [(+)-**14**]:** (+)-**14** was obtained as yellowish foam (0.088 mmol scale of reaction; 62 mg; 76%). *R<sub>f</sub>* = 0.25 (70 % EtOAc in *n*-hexane).

**<sup>1</sup>H NMR** (500 MHz, CDCl<sub>3</sub>): δ 7.85 (s, 1H), 7.61 (s, 1H), 7.55 (d, *J* = 4.9 Hz, 2H), 7.34 (d, *J* = 7.0 Hz, 1H), 7.15 – 7.09 (m, 1H), 7.05 (s, 1H), 5.20 (dd, *J* = 11.2, 4.4 Hz, 1H), 3.66 (s, 3H), 3.03 – 2.94 (m, 1H), 2.94 (d, *J* = 3.4 Hz, 1H), 2.30 (d, *J* = 8.3 Hz, 1H), 2.28 – 2.19 (m, 1H), 2.00 (s, 3H), 1.99 (s, 3H), 1.93 (s, 2H), 1.79 (d, *J* = 12.9 Hz, 2H), 1.39 (d, *J* = 2.9 Hz, 1H), 1.29 (s, 3H), 1.25 (s, 3H).

**<sup>13</sup>C NMR** (125 MHz, CDCl<sub>3</sub>): δ 176.4, 170.2, 168.4, 154.7, 151.7, 145.2, 141.6, 139.4, 135.6, 132.2, 129.6, 128.5, 128.2, 126.6, 122.6, 52.5, 52.1, 45.6, 39.3, 36.8, 36.4, 32.0, 25.2, 24.0, 22.8, 21.2, 14.2, 11.7.

**IR** (neat):  $\nu_{\max}$  3331, 2847, 1727, 1653, 1338, 1291, 987, 737 cm<sup>-1</sup>.

**HRMS** (ESI) *m/z*: [M+ H]<sup>+</sup> calcd. for [C<sub>56</sub>H<sub>64</sub>O<sub>10</sub>N<sub>2</sub> + H]<sup>+</sup> 925.4639, found 925.4634.

$[\alpha]^{25}_{589} = +82.7$  ( $c = 0.1$ ,  $\text{CHCl}_3$ ).

### Intramolecular Oxidative C-N coupling of *bis*-Acetenalide Compound (14):

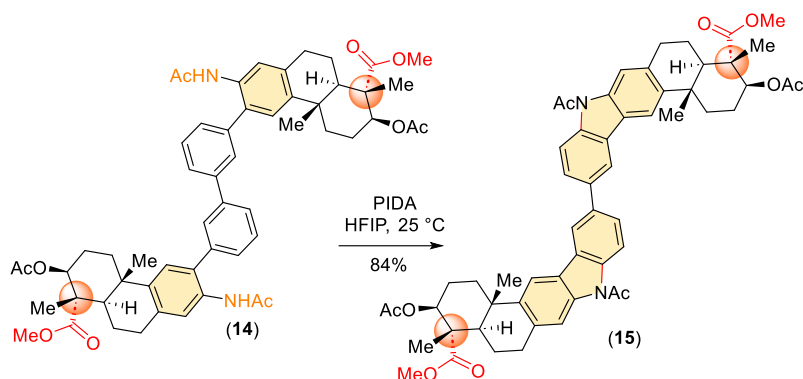

In an oven-dried round-bottom flask *bis*-acetanilide (48 mg, 0.052 mmol, 1.0 equiv.) was taken in 1,1,1,3,3,3- hexafluoropropan-2-ol under an inert atmosphere. To the solution  $\text{PhI}(\text{OAc})_2$  (40 mg, 0.124 mmol, 2.4 equiv.) was added and stirred the mixture at room temperature. After completion of reaction (monitored by TLC), it was quenched with saturated  $\text{Na}_2\text{S}_2\text{O}_3$  solution then reaction mixture was extracted with  $\text{CH}_2\text{Cl}_2$  (5 mL X 3). The organic layers were dried over  $\text{Na}_2\text{SO}_4$  and concentrated on rotary evaporator under reduced pressure. Then the crude product was purified by flash column chromatography with 20- 60% EtOAc in *n*-hexane to afford pentacyclic compounds **15**.

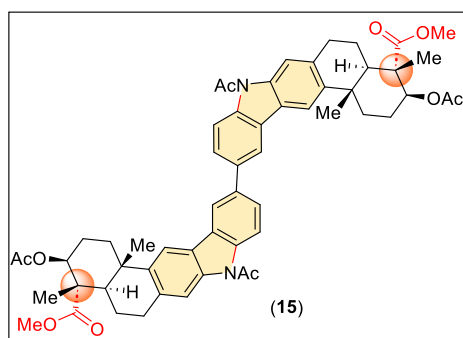

**Dimethyl** (3*S*,3'*S*,4*S*,4*aR*,4'*S*,4'*aR*,13*bS*,13'*bS*)-**3,3'-diacetoxy-8,8'-diacetyl-4,4',13*b*,13'*b*-tetramethyl-2,2',3,3',4,4*a*,4',4'*a*,5,5',6,6',8,8',13*b*,13'*b*-hexadecahydro-1*H*,1'*H*-[11,11'-binaphtho[2,1-*b*]carbazole]-4,4'-dicarboxylate [(+)-**15**]: (+)-**15** was obtained as white solid (0.052 mmol scale of reaction; 40 mg; 84%).  $R_f = 0.3$  (40 % EtOAc in *n*-hexane).**

$^1\text{H NMR}$  (500 MHz,  $\text{CDCl}_3$ )  $\delta$  8.27 (d,  $J = 8.5$  Hz, 1H), 8.24 (d,  $J = 1.9$  Hz, 1H), 7.95 (s, 1H), 7.89 (s, 1H), 7.77 (dd,  $J = 8.7, 1.9$  Hz, 1H), 5.30 – 5.24 (m, 1H), 3.69 (s, 3H), 3.20 – 3.05 (m,

2H), 2.88 (s, 3H), 2.61 (d,  $J = 3.8$  Hz, 1H), 2.33 (dd,  $J = 12.4, 2.4$  Hz, 1H), 2.02 (s, 3H), 2.01 (s, 1H), 1.93 (s, 1H), 1.89 (d,  $J = 9.3$  Hz, 2H), 1.48 (dd,  $J = 6.0, 3.2$  Hz, 1H), 1.35 (s, 3H), 1.34 (s, 3H).

$^{13}\text{C}$  NMR (125 MHz,  $\text{CDCl}_3$ )  $\delta$  176.4, 170.1, 169.9, 144.9, 138.2, 137.6, 136.7, 135.0, 127.4, 126.3, 124.9, 117.9, 116.6, 116.3, 115.5, 77.2, 52.4, 52.1, 45.7, 37.2, 31.9, 31.0, 27.7, 25.4, 24.1, 21.1, 14.1, 11.8.

IR (neat)  $\nu_{\text{max}}$  3378, 2832, 1795, 1631, 1347, 1253, 918, 713  $\text{cm}^{-1}$ .

HRMS (ESI)  $m/z$ :  $[\text{M} + \text{H}]^+$  calcd. for  $[\text{C}_{56}\text{H}_{60}\text{O}_{10}\text{N}_2 + \text{H}]^+$  921.4326, found 921.4329.

MP 183 – 185  $^{\circ}\text{C}$ ;  $[\alpha]_{589}^{25} = +93.4$  ( $c = 0.02$ ,  $\text{CHCl}_3$ ).

#### Total synthesis of dixiamycin (**1b**):

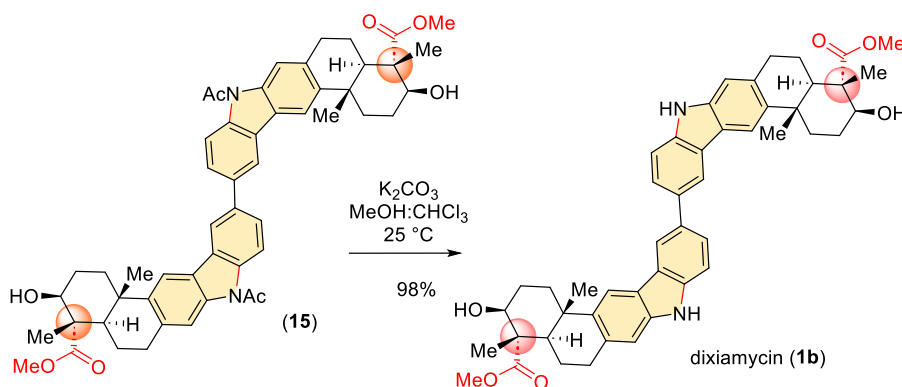

In an oven dried round-bottom flask, (+)-**15** (32 mg, 0.0347 mmol, 1.0 equiv.) was taken in a mixture of methanol and chloroform [ $\text{MeOH}:\text{CHCl}_3$  (4:1)] (2 mL). To this solution was added  $\text{K}_2\text{CO}_3$  (19 mg, 0.139 mmol, 4.0 equiv.) at 25  $^{\circ}\text{C}$  and stirring was continued for an additional 2 h. After completion of the reaction (judged by TLC analysis), the reaction mixture was diluted with water (3 mL). Next, it was extracted with dichloromethane (5 mL X 2). The organic layers were dried over  $\text{Na}_2\text{SO}_4$  and concentrated on a rotary evaporator under reduced pressure. Next, the crude methyl ester was purified by flash column chromatography with pure EtOAc in *n*-hexane to afford dixiamycin (+)-**1b** as a brown solid (26 mg, 98% yield).

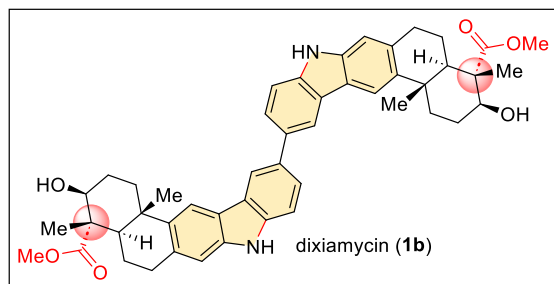

**Dimethyl (3*S*,3'*S*,4*S*,4*aR*,4'*S*,4'*aR*,13*bS*,13'*bS*)-3,3'-dihydroxy-4,4',13*b*,13'*b*-tetramethyl-2,2',3,3',4,4*a*,4',4'*a*,5,5',6,6',8,8',13*b*,13'*b*-hexadecahydro-1*H*,1'*H*-[11,11'-binaphtho[2,1-*b*]carbazole]-4,4'-dicarboxylate [(+)-**1b**]:** (+)-**1b** was obtained as brown solid (0.0347 mmol scale of reaction; 26 mg; 98%).  $R_f = 0.5$  (70 % EtOAc in *n*-hexane).

**$^1\text{H NMR}$**  (400 MHz,  $\text{CDCl}_3$ )  $\delta$  8.29 (s, 1H), 8.00 (s, 1H), 7.70 (d,  $J = 8.0$  Hz, 1H), 7.40 (d,  $J = 8.1$  Hz, 1H), 7.05 (s, 1H), 4.10 (d,  $J = 6.7$  Hz, 1H), 3.73 (d,  $J = 5.2$  Hz, 3H), 3.08 (t,  $J = 8.6$  Hz, 2H), 2.59 (d,  $J = 11.2$  Hz, 1H), 2.25 – 2.19 (m, 1H), 2.03 (d,  $J = 5.9$  Hz, 1H), 1.91 (s, 1H), 1.80 (d,  $J = 10.3$  Hz, 2H), 1.50 – 1.46 (m, 1H), 1.30 (s, 3H), 1.29 (s, 3H).

**$^{13}\text{C NMR}$**  (101 MHz,  $\text{CDCl}_3$ )  $\delta$  178.1, 141.2, 139.2, 138.8, 133.8, 133.5, 125.4, 124.3, 122.3, 118.5, 115.8, 110.7, 110.1, 75.4, 53.9, 52.4, 46.0, 37.4, 32.0, 29.5, 25.9, 22.8, 14.2, 10.8.

**IR** (neat)  $\nu_{\text{max}}$  3430, 2925, 1765, 1653, 1466, 1385, 1290, 1052, 953, 845, 762, 669  $\text{cm}^{-1}$ .

**HRMS** (ESI)  $m/z$ :  $[\text{M} + \text{H}]^+$  calcd. for  $[\text{C}_{48}\text{H}_{52}\text{O}_6\text{N}_2 + \text{H}]^+$  753.3904, found 753.3910.

m.p. 223 – 225  $^\circ\text{C}$ ;  $[\alpha]_{589}^{25} = +89.4$  ( $c = 0.02$ ,  $\text{CH}_3\text{OH}$ ).

### Synthesis of *epi*-11 from Methyl Dehydroabietate:

#### Synthesis of compound (+)-16:

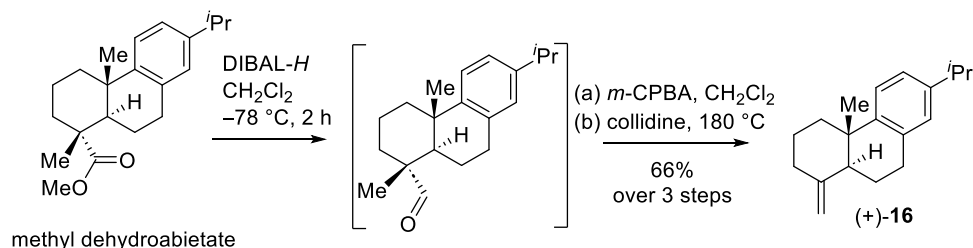

An oven-dried round-bottom flask was charged with the methyl dehydroabietate (12 g, 38.15 mmol, 1.0 equiv.) in anhydrous  $\text{CH}_2\text{Cl}_2$  (120 mL), maintaining inertness with  $\text{N}_2$  gas balloon and was cooled to  $-78\text{ }^\circ\text{C}$ , over an acetone bath followed by the addition of a solution of DIBAL-*H* (1 M in hexanes, 40 mL, 40.0 mmol, 1.05 equiv.) in dropwise manner over 30 min. The reaction mixture was stirred at the same temperature for an additional 2 h until the full consumption of the starting material. After complete consumption of the starting material, a saturated aqueous solution of potassium sodium tartrate (50 mL) was added slowly to the reaction mixture, and the resultant mixture was stirred vigorously for another 1 h at  $25\text{ }^\circ\text{C}$ . The resulting biphasic mixture was then transferred to a separating funnel and the organic layer was separated. The aqueous layer was further extracted with  $\text{CH}_2\text{Cl}_2$  (70 mL X 2). The combined organic layers were concentrated under reduced pressure and the crude product was taken for the next step.  $R_f = 0.4$  (2.5% EtOAc in hexane).

Solid *m*-CPBA (7.9 g, 45.78 mmol, 1.2 equiv.) and  $\text{NaHCO}_3$  (8.01 g, 95.37 mmol, 2.5 equiv.) were directly added to a solution of crude aldehyde in  $\text{CH}_2\text{Cl}_2$  and the mixture was stirred at  $25\text{ }^\circ\text{C}$  for 4 h until the full consumption of starting material. After completion of the reaction, the solution was extracted with  $\text{CH}_2\text{Cl}_2$  and water. The aqueous phase was extracted thrice with  $\text{CH}_2\text{Cl}_2$ . The organic layer was washed with  $\text{NaHCO}_3$  solution and filtered. The organic filtrate was dried over anhydrous  $\text{Na}_2\text{SO}_4$  and concentrated in rotary evaporator under vacuum and the crude product was taken for the next step.  $R_f = 0.42$  (2.5% EtOAc in hexane).

A solution of the crude product in 2,6-lutidine (22 mL) was stirred under reflux condition at  $180\text{ }^\circ\text{C}$  for 8 h (TLC monitoring). The mixture was cooled to  $25\text{ }^\circ\text{C}$  and the solution was diluted with EtOAc and the brown solution was washed with 2 (*N*) HCl and brine. The organic layer was dried over anhydrous  $\text{Na}_2\text{SO}_4$  and concentrated in rotary evaporator under vacuum. The crude product was purified by flash chromatography with *n*-Hexane to afford (+)-**16** as colorless liquid (6.4 g, 66% yield over 3 steps).

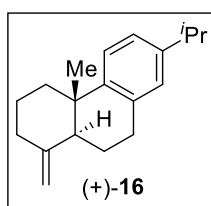



**(4a*S*,10a*S*)-7-Isopropyl-4a-methyl-1-methylene-1,2,3,4,4a,9,10,10a-**

**octahydrophenanthrene [(+)-16]:** The compound (+)-**16** was obtained as colorless oil (24.61 mmol scale of reaction; 6.4 g; 66% over 3steps).  $R_f = 0.7$  (in hexane).

**$^1\text{H NMR}$**  (400 MHz,  $\text{CDCl}_3$ ):  $\delta$  7.23 (d,  $J = 8.1$  Hz, 1H), 7.02 (dd,  $J = 8.0, 2.1$  Hz, 1H), 6.94 (s, 1H), 4.86 (d,  $J = 1.9$  Hz, 1H), 4.61 (d,  $J = 1.9$  Hz, 1H), 2.91 (dd,  $J = 10.0, 5.6$  Hz, 2H), 2.90 – 2.77 (m, 1H), 2.41 – 2.35 (m, 1H), 2.31 – 2.26 (m, 1H), 2.23 (dd,  $J = 11.7, 2.5$  Hz, 1H), 2.06 (dt,  $J = 13.0, 6.2$  Hz, 1H), 1.88 – 1.79 (m, 2H), 1.78 – 1.68 (m, 2H), 1.62 – 1.53 (m, 1H), 1.26 (s, 3H), 1.24 (s, 3H), 1.01 (s, 3H).

**$^{13}\text{C NMR}$**  (100 MHz,  $\text{CDCl}_3$ ):  $\delta$  150.8, 145.8, 144.7, 135.0, 127.2, 125.5, 124.0, 106.4, 48.0, 39.3, 38.5, 36.5, 33.6, 30.1, 24.1, 23.9, 22.9, 21.5.

**IR** (neat):  $\nu_{\text{max}}$  2932, 1745, 1628, 1562, 1132, 1065  $\text{cm}^{-1}$ .

**HRMS** (ESI)  $m/z$ :  $[\text{M}+\text{H}]^+$  calcd. for  $[\text{C}_{19}\text{H}_{26} + \text{H}]^+$  255.2113; Found 255. 2107.

$[\alpha]_D^{25} = +159.20$  ( $c = 1.0$ ,  $\text{CHCl}_3$ ).

**Procedure for the allylic oxidation of compound (+)-16:**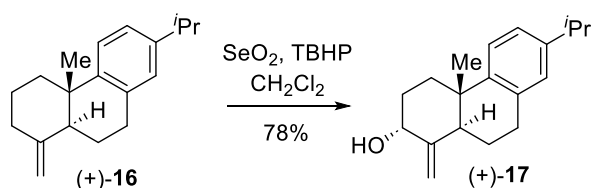

To a solution of compound (+)-**16** (11.12 g, 43.7 mmol, 1.0 equiv.) in  $\text{CH}_2\text{Cl}_2$ ,  $t\text{BuOOH}$  (70% in water) (16.8 mL, 131.12 mmol, 3.0 equiv.) and  $\text{SeO}_2$  (2.42 g, 21.86 mmol, 0.5 equiv.) were added. The mixture was stirred at 25 °C for 8 h. After completion of the reaction saturated solution of  $\text{Na}_2\text{S}_2\text{O}_3$  was added to the reaction mixture and the mixture was washed with brine. The organic phase was separated, dried over  $\text{Na}_2\text{SO}_4$  and concentrated to give the crude product. The crude product was purified by column chromatography with *n*-Hexane: EtOAc (9:1) to afford (+)-**17** as colorless oil (9.20 g, 78% yield).

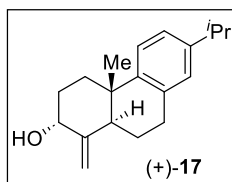

**(2*R*,4*aS*,10*aR*)-7-Isopropyl-4*a*-methyl-1-methylene-1,2,3,4,4*a*,9,10,10*a*-**

**octahydrophenanthren-2-ol [(+)-17]:** The compound (+)-17 was obtained as colorless oil (43.7 mmol scale of reaction; 9.20 g; 78%). ( $R_f = 0.32$  (10% EtOAc in hexane)).

**$^1\text{H NMR}$**  (400 MHz,  $\text{CDCl}_3$ ):  $\delta$  7.26 (d,  $J = 8.1$  Hz, 1H), 7.06 (dd,  $J = 8.3, 2.1$  Hz, 1H), 6.98 (d,  $J = 2.1$  Hz, 1H), 5.09 (s, 1H), 4.77 (t,  $J = 1.8$  Hz, 1H), 4.39 – 4.36 (m, 1H), 2.99 – 2.93 (m, 2H), 2.91 – 2.87 (m, 1H), 2.81 (ddd,  $J = 10.9, 3.5, 1.8$  Hz, 1H), 2.11 – 2.06 (m, 1H), 2.01 (d,  $J = 6.3$  Hz, 1H), 1.95 (dd,  $J = 5.9, 3.3$  Hz, 2H), 1.84 – 1.79 (m, 2H), 1.29 (s, 3H), 1.28 (s, 3H), 1.02 (s, 3H).

**$^{13}\text{C NMR}$**  (125 MHz,  $\text{CDCl}_3$ ):  $\delta$  151.8, 145.9, 144.2, 134.7, 127.1, 125.3, 124.0, 109.9, 72.9, 41.6, 39.0, 33.5, 30.2, 29.9, 24.0, 23.9, 22.0, 20.9.

**IR** (neat):  $\nu_{\text{max}}$  3641, 2958, 1749, 1622, 1456, 1254, 986  $\text{cm}^{-1}$ .

**HRMS** (ESI)  $m/z$ :  $[\text{M} + \text{H}]^+$  Calcd for  $[\text{C}_{19}\text{H}_{26}\text{O} + \text{H}]^+$  271.2062; Found 271.2056.

$[\alpha]_{589}^{25} = +157.40$  ( $c = 0.2$ ,  $\text{CHCl}_3$ ).

**Synthesis of compound (+)-18:**

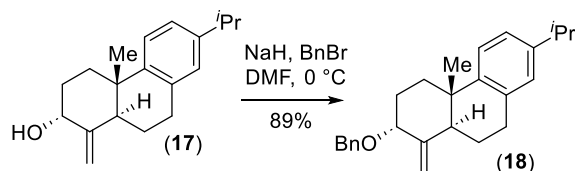

Allylic alcohol **17** (7 g, 23.2 mmol, 1.0 equiv.) was taken in an oven dried round bottom flask dissolved in 50 mL of DMF maintaining  $\text{N}_2$  inertness and set on an ice bath. Sodium hydride (1.86 g, 46.5 mmol, 2.0 equiv.) was added in portion-wise manner to the reaction vessel and stirred for 15 min at 0 °C. Then benzyl bromide (4.22 mL, 34.8 mmol, 1.5 equiv.) was directly added to the solution and the reaction mixture was allowed to stir at 25 °C for 1 h until the full

consumption of starting material (monitored by TLC). The reaction was quenched with excess of saturated aqueous  $\text{NH}_4\text{Cl}$  solution. Then the solution was extracted with EtOAc and water. The aqueous phase was extracted with EtOAc (60 mL X 3). The combined organic layers were dried over anhydrous  $\text{Na}_2\text{SO}_4$  and concentrated in a rotary evaporator under vacuum. The crude product was purified by flash chromatography with 5% EtOAc in *n*-hexane to afford (+)-**18** as yellow liquid (7.88 g, 89% yield).

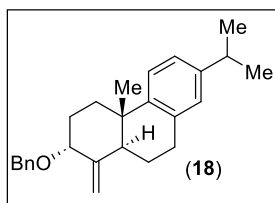

(2*R*,4*aS*,10*aR*)-2-(Benzyloxy)-7-isopropyl-4*a*-methyl-1-methylene-1,2,3,4,4*a*,9,10,10*a*-octahydrophenanthrene [(+)-**18**]: (+)-**18** was obtained as colourless liquid (23.2 mmol scale; 7.88 g; 89%).  $R_f = 0.5$  (5% EtOAc in *n*-hexane).

**$^1\text{H NMR}$**  (400 MHz,  $\text{CDCl}_3$ ):  $\delta$  7.33 – 7.26 (m, 4H), 7.24 – 7.19 (m, 2H), 7.00 (ddd,  $J = 8.1, 1.7, 0.7$  Hz, 1H), 6.93 (dd,  $J = 1.9, 0.8$  Hz, 1H), 5.05 (t,  $J = 1.5$  Hz, 1H), 4.88 (t,  $J = 1.7$  Hz, 1H), 4.45 (dd,  $J = 12.0, 0.6$  Hz, 1H), 4.27 (d,  $J = 12.0$  Hz, 1H), 3.94 (d,  $J = 3.3$  Hz, 1H), 2.91 (dd,  $J = 10.1, 5.3$  Hz, 2H), 2.87 – 2.80 (m, 1H), 2.66 (ddt,  $J = 9.1, 5.9, 1.6$  Hz, 1H), 2.05 (dd,  $J = 10.7, 1.4$  Hz, 2H), 1.99 (dd,  $J = 12.7, 3.5$  Hz, 1H), 1.93 – 1.86 (m, 1H), 1.81 – 1.76 (m, 2H), 1.24 (s, 3H), 1.22 (s, 3H), 1.00 (s, 3H).

**$^{13}\text{C NMR}$**  (126 MHz,  $\text{CDCl}_3$ ):  $\delta$  149.3, 145.8, 144.4, 139.1, 134.7, 128.2, 127.5, 127.2, 127.1, 125.3, 123.9, 111.3, 79.3, 69.0, 42.0, 39.0, 33.5, 33.0, 29.9, 29.3, 24.0, 22.4, 21.0.

**IR** (neat):  $\nu_{\text{max}}$  2865, 1813, 1641, 1473, 1118, 957, 856  $\text{cm}^{-1}$ .

**HRMS** (ESI)  $m/z$ :  $[\text{M} + \text{Na}]^+$  calcd. for  $[\text{C}_{26}\text{H}_{32}\text{O} + \text{Na}]^+$  383.2351, found 383.2345.

$[\alpha]_{589}^{25} = +47.03$  ( $c = 1.0, \text{CHCl}_3$ ).

**Synthesis of compound (+)-19:**

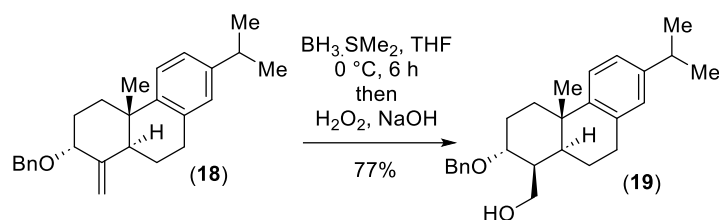

In an oven dried round-bottom flask a solution of benzyl ether (**18**) (5.23 g, 14.5 mmol, 1.0 equiv.) in anhydrous THF (60 mL) at 0 °C under an N<sub>2</sub> atmosphere Me<sub>2</sub>S.BH<sub>3</sub> (1.37 mL, 14.5 mmol, 1.0 equiv.). The mixture was then stirred at 25 °C for 8 h. Then 4(M) NaOH (50 mL), and 30% H<sub>2</sub>O<sub>2</sub> (20 mL) were added and stir the mixture was stirred at 25 °C for 4 h. After completion of the reaction (confirmed by TLC analysis), the reaction mixture was then extracted with 50% EtOAc in *n*-hexane (40 mL X 2). The organic layers were collected, dried over Na<sub>2</sub>SO<sub>4</sub> and concentrated in a rotary evaporator under reduced pressure. It was purified by flash chromatography using 25% EtOAc in *n*-hexane to afford (+)-**19** as white gel (4.22 g, 77% yield).

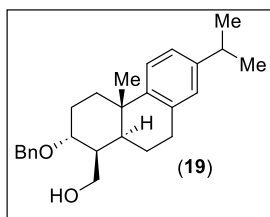

**((1*S*,2*R*,4*aS*,10*aS*)-2-(Benzyloxy)-7-isopropyl-4*a*-methyl-1,2,3,4,4*a*,9,10,10*a*-octahydrophenanthren-1-yl)methanol [(+)-**19**]: (+)-**19** was obtained as white gel (14.5 mmol scale; 4.22 g; 77%). R<sub>f</sub> = 0.42 (20% EtOAc in *n*-hexane).**

**<sup>1</sup>H NMR** (400 MHz, CDCl<sub>3</sub>): δ 7.43 – 7.36 (m, 4H), 7.33 (td, *J* = 6.0, 2.5 Hz, 1H), 7.19 (d, *J* = 8.3 Hz, 1H), 7.02 (dd, *J* = 8.1, 2.0 Hz, 1H), 6.92 (d, *J* = 2.1 Hz, 1H), 4.60 (d, *J* = 12.0 Hz, 1H), 4.52 (d, *J* = 12.0 Hz, 1H), 4.23 (t, *J* = 2.6 Hz, 1H), 3.63 (dd, *J* = 9.6, 2.7 Hz, 1H), 3.50 (t, *J* = 9.8 Hz, 1H), 3.01 – 2.89 (m, 2H), 2.88 – 2.83 (m, 1H), 2.31 (ddd, *J* = 13.0, 5.4, 2.1 Hz, 1H), 2.10 (dtd, *J* = 12.4, 4.4, 2.1 Hz, 1H), 2.03 (dt, *J* = 12.4, 3.1 Hz, 1H), 1.96 – 1.85 (m, 3H), 1.81 – 1.73 (m, 1H), 1.60 (ddt, *J* = 12.9, 7.0, 1.8 Hz, 1H), 1.27 (s, 3H), 1.25 (s, 3H), 1.04 (s, 3H).

**<sup>13</sup>C NMR** (125 MHz, CDCl<sub>3</sub>): δ 145.8, 145.7, 138.4, 134.8, 128.4, 127.6, 127.6, 127.0, 124.7, 123.96, 73.0, 69.3, 67.8, 48.6, 37.5, 36.7, 33.5, 31.9, 30.5, 25.6, 24.6, 24.0, 23.6.

**IR** (neat)  $\nu_{\max}$  3438, 2865, 1873, 1651, 1414, 1137, 998  $\text{cm}^{-1}$ .

**HRMS** (ESI)  $m/z$ :  $[\text{M} + \text{Na}]^+$  calcd. for  $[\text{C}_{26}\text{H}_{34}\text{O}_2 + \text{Na}]^+$  401.2456, found 401.2451.

$[\alpha]_{589}^{25} = +68.4$  ( $c = 0.1$ ,  $\text{CHCl}_3$ ).

### Synthesis of compound (+)-**20**:

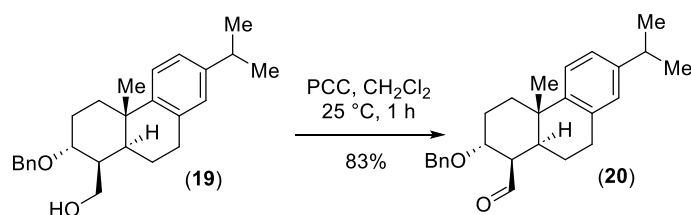

In an oven dried round-bottom flask the alcohol **19** (438 mg, 1.157 mmol, 1.0eq.) was charged in  $\text{CH}_2\text{Cl}_2$  under  $\text{N}_2$  atmosphere. Pyridinium chlorochromate (300 mg, 6.98 mmol, 1.2 eq.) was added to the reaction mixture and then it was stirred at 25 °C for 2 h. After completion of the reaction (monitored by TLC) the crude product was purified by flash chromatography with *n*-Hexane-EtOAc (9:1) to afford **20** as white foam (361 mg, 83% yield).

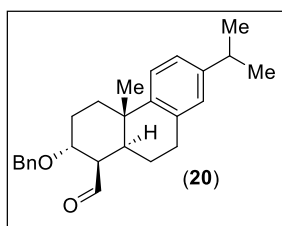

**(1R,2R,4aS,10aS)-2-(Benzyloxy)-7-isopropyl-4a-methyl-1,2,3,4,4a,9,10,10a-**

**octahydrophenanthrene-1-carbaldehyde [(+)-**20**]**: (+)-**20** was obtained as white gel (1.15 mmol scale; 361 mg; 83%).  $R_f = 0.36$  (10% EtOAc in *n*-hexane).

**$^1\text{H}$  NMR** (400 MHz,  $\text{CDCl}_3$ ):  $\delta$  10.23 (d,  $J = 3.7$  Hz, 1H), 7.40 – 7.34 (m, 4H), 7.33 – 7.30 (m, 1H), 7.22 (d,  $J = 8.1$  Hz, 1H), 7.04 (dd,  $J = 8.2, 2.1$  Hz, 1H), 6.94 (d,  $J = 2.1$  Hz, 1H), 4.62 (d,  $J = 3.4$  Hz, 2H), 3.67 (dt,  $J = 12.0, 5.2$  Hz, 1H), 2.97 – 2.80 (m, 4H), 2.47 (dt,  $J = 13.5, 3.7$  Hz, 1H), 2.26 (d,  $J = 4.3$  Hz, 1H), 2.23 – 2.14 (m, 1H), 2.04 – 1.96 (m, 1H), 1.93 – 1.86 (m, 2H), 1.62 – 1.55 (m, 1H), 1.27 (s, 3H), 1.25 (s, 3H), 1.14 (s, 3H).

$^{13}\text{C}$  NMR (125 MHz,  $\text{CDCl}_3$ ):  $\delta$  204.5, 146.3, 143.8, 138.2, 134.7, 128.5, 127.7, 127.6, 127.2, 124.8, 124.2, 77.9, 70.3, 54.8, 45.7, 36.8, 36.4, 33.5, 30.3, 26.3, 26.0, 24.1, 24.0, 24.0.

IR (neat)  $\nu_{\text{max}}$  2878, 1853, 1681, 1455, 1164, 987, 874  $\text{cm}^{-1}$ .

HRMS (ESI)  $m/z$ :  $[\text{M} + \text{Na}]^+$  calcd. for  $[\text{C}_{26}\text{H}_{32}\text{O}_2 + \text{Na}]^+$  399.2300, found 399.2295.

$[\alpha]^{25}_{589} = +45.23$  ( $c = 0.1$ ,  $\text{CHCl}_3$ ).

### Synthesis of compound (+)-21:

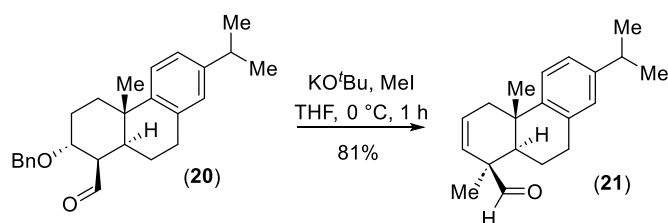

In an oven dried round-bottom flask compound **20** (421 mg, 1.16 mmol, 1.0 equiv.) was taken in THF (12 mL) at 25 °C under an argon atmosphere. To this solution KO<sup>t</sup>Bu (313.29 mg, 2.79 mmol, 2.5 equiv.) at 0 °C and methyl iodide (0.086 mL, 1.39 mmol, 1.2 equiv.) was added and stirred for an additional 1 h. After completion of the reaction (confirmed by TLC analysis), it was quenched with saturated aqueous  $\text{Na}_2\text{S}_2\text{O}_3$  solution (10 mL). The reaction mixture was then extracted with EtOAc (10 mL X 2). The organic layers were collected, dried over  $\text{Na}_2\text{SO}_4$  and concentrated in a rotary evaporator under reduced pressure. It was purified by flash chromatography using 5% EtOAc in *n*-hexane to afford (+)-**21** as yellow liquid (266 mg, 81% yield).

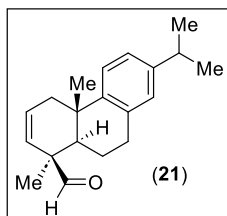

(1*S*,4*aS*,10*aR*)-7-Isopropyl-1,4*a*-dimethyl-1,4,4*a*,9,10,10*a*-hexahydrophenanthrene-1-carbaldehyde [(+)-**21**]: (+)-**21** was obtained as white foam (1.16 mmol scale; 266 mg; 81%).  $R_f = 0.52$  (5% EtOAc in *n*-hexane).

$^1\text{H NMR}$  (400 MHz,  $\text{CDCl}_3$ ):  $\delta$  9.86 (d,  $J = 1.8$  Hz, 1H), 7.19 (dd,  $J = 8.2, 2.3$  Hz, 1H), 7.06 (dd,  $J = 8.2, 2.2$  Hz, 1H), 6.93 (d,  $J = 2.4$  Hz, 1H), 5.95 (ddt,  $J = 9.7, 5.7, 1.9$  Hz, 1H), 5.69 (ddq,  $J = 10.0, 2.8, 1.4$  Hz, 1H), 2.95 (ddd,  $J = 16.3, 5.4, 2.6$  Hz, 1H), 2.91 – 2.78 (m, 2H), 2.69 – 2.58 (m, 1H), 2.27 – 2.13 (m, 2H), 1.95 – 1.83 (m, 2H), 1.27 (s, 3H), 1.26 (s, 3H), 1.24 (s, 3H), 1.19 (s, 3H).

$^{13}\text{C NMR}$  (125 MHz,  $\text{CDCl}_3$ ):  $\delta$  205.4, 146.2, 143.7, 134.63, 129.8, 127.8, 126.8, 126.1, 124.6, 50.7, 50.0, 50.1, 40.1, 36.6, 33.6, 31.5, 25.5, 24.1, 23.3, 20.1.

**IR** (neat)  $\nu_{\text{max}}$  2868, 1813, 1639, 1443, 1135, 918, 875  $\text{cm}^{-1}$ .

**HRMS** (ESI)  $m/z$ :  $[\text{M} + \text{H}]^+$  calcd. for  $[\text{C}_{20}\text{H}_{26}\text{O} + \text{H}]^+$  283.2062, found 283.2056.

$[\alpha]_{589}^{25} = +65.3$  ( $c = 0.3$ ,  $\text{CHCl}_3$ ).

### Synthesis of compound (+)-**22**:

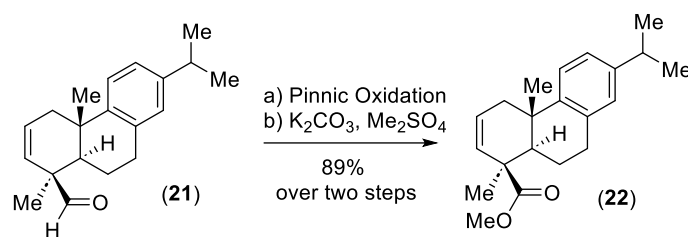

In an oven dried round-bottom flask to a solution of the aldehyde compound **21** (358 mg, 1.267 mmol, 1.00 eq.) in a mixed solvent system of THF:  $\text{H}_2\text{O}$ :  $t\text{BuOH}$  (10:10:1), 2-Methyl-2-butene (1.346 mL, 12.67 mmol, 10.0 eq.) was added. Then a mixture of  $\text{NaClO}_2$  (343 mg, 3.801 mmol, 3.00 eq.) and  $\text{KH}_2\text{PO}_4$  (861 mg, 6.33 mmol, 5.0 eq.) at 0 °C. The mixture was warmed to room temperature and stirred for 2 h and 10 ml of water was added. Then it was extracted three times with EtOAc and dried over  $\text{Na}_2\text{SO}_4$  and concentrated in a rotary evaporator under vacuum to afford 364 mg of the corresponding acid compound as white

foam. The crude product was charged for the next step without further purification.  $R_f = 0.25$  (10% EtOAc in *n*-hexane).

In an oven-dried round-bottom flask crude acid was taken and dissolved in acetone solvent then  $K_2CO_3$  (349 mg, 2.53 mmol, 2.0 equiv.) and  $Me_2SO_4$  (0.239 mL, 2.53 mmol, 2.0 equiv.) added simultaneously and stirred for 1h in 60 °C. Finally work up was done by  $CH_2Cl_2/H_2O$ . The organic filtrate was dried over anhydrous  $Na_2SO_4$  and concentrated in a rotary evaporator under vacuum. The crude products were purified by flash chromatography with *n*-Hexane-EtOAc (20:1) to afford compound **22** as yellow gel (352.32 mg, 68% yield over 2 steps),  $R_f = 0.42$  (5% EtOAc in hexane).

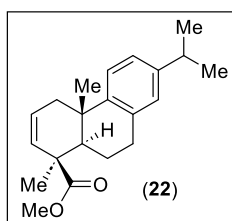

**Methyl** (1*S*,4*aS*,10*aR*)-7-isopropyl-1,4*a*-dimethyl-1,4,4*a*,9,10,10*a*-hexahydrophenanthrene-1-carboxylate [(+)-**22**]: (+)-**22** was obtained as colourless liquid (1.26 mmol scale; 352 g; 89% over 2 steps).  $R_f = 0.42$  (5% EtOAc in *n*-hexane).

**$^1H$  NMR** (400 MHz,  $CDCl_3$ ):  $\delta$  7.24 – 7.19 (m, 1H), 7.07 (d,  $J = 8.1$  Hz, 1H), 6.94 (s, 1H), 5.85 – 5.75 (m, 2H), 3.70 (d,  $J = 3.0$  Hz, 3H), 2.94 (dd,  $J = 17.1, 4.7$  Hz, 1H), 2.89 – 2.76 (m, 2H), 2.60 (dd,  $J = 17.6, 4.4$  Hz, 1H), 2.31 (dd,  $J = 14.7, 4.4$  Hz, 1H), 2.18 (d,  $J = 17.6$  Hz, 1H), 1.94 (dd,  $J = 13.2, 4.8$  Hz, 1H), 1.79 (d,  $J = 12.3$  Hz, 1H), 1.43 (d,  $J = 2.9$  Hz, 3H), 1.29 (s, 3H), 1.27 (d,  $J = 4.4$  Hz, 3H), 1.19 (s, 3H).

**$^{13}C$  NMR** (125 MHz,  $CDCl_3$ ):  $\delta$  176.3, 145.8, 144.2, 135.1, 131.6, 128.4, 127.8, 127.7, 126.7, 126.3, 124.9, 124.4, 51.7, 50.5, 45.3, 40.7, 36.6, 33.5, 31.8, 27.8, 24.0, 23.7, 21.3.

**IR** (neat)  $\nu_{max}$  3333, 2844, 1887, 1693, 1488, 1111, 957  $cm^{-1}$ .

**HRMS** (ESI)  $m/z$ :  $[M + H]^+$  calcd. for  $[C_{21}H_{28}O_2 + H]^+$  313.2168, found 313.2156.



$[\alpha]_{589}^{25} = +47.2$  ( $c = 1.0$ ,  $\text{CHCl}_3$ ).

### Synthesis of compound (+)-4-*epi*-14:

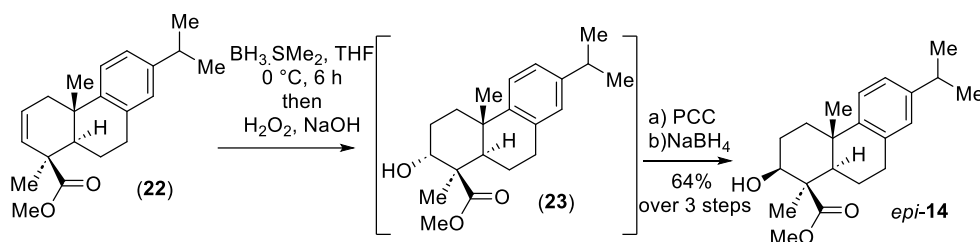

In an oven dried round-bottom flask to a solution of compound **22** (235 mg, 0.682 mmol, 1.0 equiv.) in anhydrous THF (10 mL) at  $0^\circ\text{C}$  under an  $\text{N}_2$  atmosphere  $\text{Me}_2\text{S} \cdot \text{BH}_3$  (64.7  $\mu\text{L}$ , 0.682 mmol, 1.0 equiv.) was added. The mixture was then stirred at  $25^\circ\text{C}$  for 8 h. After completion of the reaction (confirmed by TLC analysis), 4 M NaOH (2 mL), and 30%  $\text{H}_2\text{O}_2$  (1 mL) were added and stir the mixture was stirred at  $25^\circ\text{C}$  for 4 h. Then the solution was extracted with ethyl acetate and water. The aqueous phase was extracted thrice with ethyl acetate. The organic filtrate was dried over anhydrous  $\text{Na}_2\text{SO}_4$  and concentrated in a rotary evaporator under vacuum to afford the secondary hydroxy compound **23** and its epimer as a 3:1 mixture as yellow gel (441 mg). The crude product was charged for the next step without purification. The crude product was charged in  $\text{CH}_2\text{Cl}_2$  under  $\text{N}_2$  atmosphere. Pyridinium chlorochromate (175.9 mg, 0.818 mmol, 1.2 eq.) was added to the reaction mixture and then it was stirred at  $25^\circ\text{C}$  for 2 h. After completion of the reaction (monitored by TLC) the crude product was purified by flash chromatography with *n*-hexane-EtOAc (14:1) to afford the aldehyde as white foam which was charged for the next step.

To a stirred solution of the aldehyde (196 mg, 0.583 mmol, 1.0 equiv.) in MeOH (2 mL) at  $0^\circ\text{C}$  was added  $\text{NaBH}_4$  (22 mg, 0.583 mmol, 1.0 equiv.) and allowed to warm up to rt. After 30 min, the reaction was quenched with saturated aqueous  $\text{NH}_4\text{Cl}$  (3 mL) and the aqueous mixture was extracted with EtOAc and water. The aqueous layer was then extracted three times with EtOAc and dried over  $\text{Na}_2\text{SO}_4$  and concentrated in a rotary evaporator under vacuum. The crude product was purified by column chromatography with *n*-hexane-EtOAc (3:1) to afford *epi*-**11** as colorless oil (144 mg, 64% yield over 3 steps).

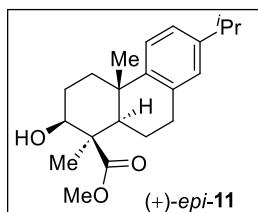

**Methyl** (1*S*,2*S*,4*aS*,10*aR*)-2-hydroxy-7-isopropyl-1,4*a*-dimethyl-1,2,3,4,4*a*,9,10,10*a*-octahydrophenanthrene-1-carboxylate [(+)-epi-11]: (+)-epi-11 was obtained as white foam (0.682 mmol scale; 144 mg; 64% over 3 steps).  $R_f = 0.22$  (10% EtOAc in *n*-hexane).

$^1\text{H NMR}$  (400 MHz,  $\text{CDCl}_3$ ):  $\delta$  7.16 (d,  $J = 8.1$  Hz, 1H), 6.99 (dd,  $J = 8.5, 2.1$  Hz, 1H), 6.88 (d,  $J = 2.1$  Hz, 1H), 3.67 (s, 3H), 3.14 (dd,  $J = 12.3, 4.7$  Hz, 1H), 2.86 (dd,  $J = 5.6, 1.9$  Hz, 1H), 2.84 – 2.74 (m, 2H), 2.33 – 2.27 (m, 1H), 2.23 – 2.16 (m, 1H), 2.15 – 2.11 (m, 1H), 1.99 – 1.88 (m, 2H), 1.52 (dd,  $J = 13.7, 4.3$  Hz, 1H), 1.48 (s, 3H), 1.43 (dd,  $J = 12.2, 1.8$  Hz, 1H), 1.21 (d,  $J = 7.3$  Hz, 6H), 1.04 (s, 3H).

$^{13}\text{C NMR}$  (125 MHz,  $\text{CDCl}_3$ ):  $\delta$  178.5, 146.0, 144.7, 134.8, 126.8, 125.6, 124.2, 78.2, 52.5, 51.2, 49.0, 38.1, 37.8, 33.5, 32.2, 29.1, 24.0, 23.6, 22.8, 21.1.

**IR** (neat)  $\nu_{\text{max}}$  3352, 2862, 1827, 1621, 1435, 1164, 952  $\text{cm}^{-1}$ .

**HRMS** (ESI)  $m/z$ :  $[\text{M} + \text{Na}]^+$  calcd. for  $[\text{C}_{21}\text{H}_{30}\text{O}_3 + \text{Na}]^+$  353.2087, found 353.2082.

$[\alpha]_{589}^{25} = +75.40$  ( $c = 0.3$ ,  $\text{CHCl}_3$ ).

### Synthesis of compound (+)-S39:

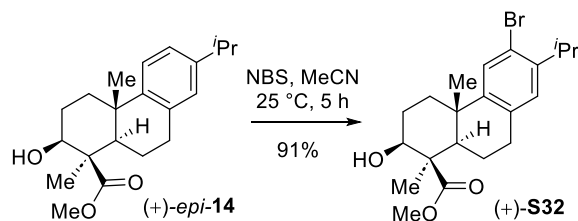

In an oven dried round-bottom flask  $\beta$ -hydroxy compound (+)-epi-14 (880 g, 2.66 mmol, 1.0 equiv.) was taken in  $\text{CH}_3\text{CN}$  (12 mL) at 25 °C under an argon atmosphere. To this solution was added a recrystallized *N*-bromo succinimide [NBS (568 mg, 3.19 mmol, 1.2 equiv.)] at 25 °C and stirred for an additional 4 h. After completion of the reaction (confirmed by TLC analysis),

it was quenched with saturated aqueous  $\text{Na}_2\text{S}_2\text{O}_3$  solution (2 mL). The reaction mixture was then extracted with 50% EtOAc in *n*-hexane (10 mL X 2). The organic layers were collected, dried over  $\text{Na}_2\text{SO}_4$  and concentrated in a rotary evaporator under reduced pressure. It was purified by flash chromatography using 25% EtOAc in *n*-hexane to afford (+)-**S32** as white foam (990 mg, 91% yield).

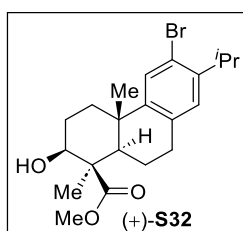

**Methyl** (1*R*,2*S*,4*aS*,10*aR*)-6-bromo-2-hydroxy-7-isopropyl-1,4*a*-dimethyl-1,2,3,4,4*a*,9,10,10*a*-octahydrophenanthrene-1-carboxylate [(+)-**S32**]: (+)-**S32** was obtained as white foam (2.66 mmol scale, 990 mg, 91% yield).  $R_f = 0.5$  (20% EtOAc in *n*-hexane).

$^1\text{H NMR}$  (500 MHz,  $\text{CDCl}_3$ ):  $\delta$  7.40 (s, 1H), 6.94 (s, 1H), 3.71 (s, 3H), 3.52 (d,  $J = 11.9$  Hz, 1H), 3.31 – 3.24 (m, 1H), 3.17 (s, 1H), 2.89 (dd,  $J = 16.9, 5.3$  Hz, 1H), 2.76 (dd,  $J = 12.7, 5.8$  Hz, 1H), 2.29 – 2.26 (m, 1H), 2.21 – 2.16 (m, 2H), 1.98 (ddd,  $J = 19.7, 10.3, 5.6$  Hz, 2H), 1.94 – 1.88 (m, 1H), 1.51 (s, 3H), 1.23 (d,  $J = 2.9$  Hz, 6H), 1.07 (s, 3H).

$^{13}\text{C NMR}$  (125 MHz,  $\text{CDCl}_3$ ):  $\delta$  178.3, 146.8, 144.4, 134.5, 129.9, 127.0, 121.7, 78.0, 52.1, 51.3, 48.9, 38.0, 37.9, 32.3, 31.7, 29.0, 23.5, 22.9, 22.8, 22.8, 20.9.

**IR** (neat)  $\nu_{\text{max}}$  3312, 2815, 2786, 1654, 1639, 1524, 1416, 1319, 846, 763  $\text{cm}^{-1}$ .

**HRMS** (ESI)  $m/z$ :  $[\text{M} + \text{Na}]^+$  calcd. for  $[\text{C}_{21}\text{H}_{29}\text{BrO}_3 + \text{Na}]^+$  431.1192, found 431.1147.

$[\alpha]_{589}^{25} = +48.3$  ( $c = 0.65$ ,  $\text{CHCl}_3$ ).

**Synthesis of compound (+)-4:**

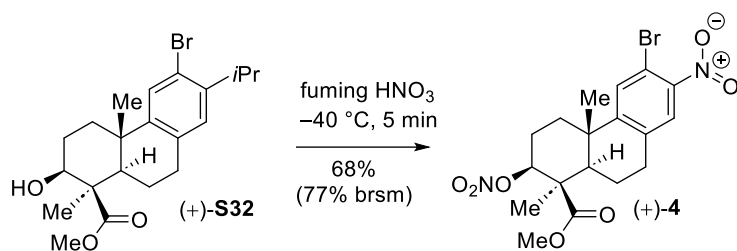

An oven-dried round-bottom flask was charged with 2 mL of fuming nitric acid and it was cooled to  $-40\text{ }^\circ\text{C}$ . Then compound (+)-S32 (873 mg, 2.13 mmol, 1.0 equiv.) was directly charged into the reaction vessel and scratched well with a spatula (5 minutes) maintaining the  $-40\text{ }^\circ\text{C}$  temperature. After 5 minutes (TLC analysis showed product formation), the reaction mixture was quenched with water (5 mL) and saturated  $\text{NaHCO}_3$  (10 mL) and extracted with  $\text{CH}_2\text{Cl}_2$  (10 mL X 3). The organic layers were dried over  $\text{Na}_2\text{SO}_4$  and concentrated in a rotary evaporator under reduced pressure and purified by column chromatography 10% EtOAc in *n*-hexane to afford compound (+)-4 as light green foam [663 mg, 68% yield (77% BRSM)].

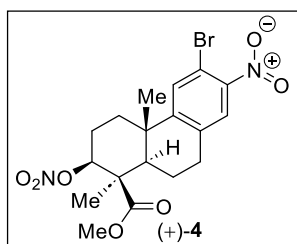

**Methyl (1*R*,2*S*,4*aS*,10*aR*)-6-bromo-1,4*a*-dimethyl-7-nitro-2-(nitrooxy)-1,2,3,4,4*a*,9,10,10*a*-octahydrophenanthrene-1-carboxylate [(+)-4]:** (+)-4 was obtained as a light green foam following the procedure described above. (2.13 mmol scale, 663 mg, 68% yield);  $R_f = 0.5$  (20% EtOAc in *n*-hexane).

**$^1\text{H NMR}$**  (500 MHz,  $\text{CDCl}_3$ ): 7.62 (s, 1H), 7.59 (s, 1H), 4.79 (dd,  $J = 12.4, 4.5$  Hz, 1H), 3.75 (s, 3H), 3.05 – 2.99 (m, 1H), 2.86 (dt,  $J = 12.6, 6.6$  Hz, 1H), 2.70 (dd,  $J = 13.2, 4.1$  Hz, 1H), 2.47 – 2.43 (m, 1H), 2.30 (dd,  $J = 14.3, 6.7$  Hz, 1H), 2.12 (dd,  $J = 13.3, 4.2$  Hz, 1H), 1.88 (dd,  $J = 13.1, 6.0$  Hz, 1H), 1.71 (d,  $J = 4.2$  Hz, 1H), 1.66 – 1.61 (m, 2H), 1.48 (s, 3H), 1.14 (s, 3H).

**$^{13}\text{C NMR}$**  (125 MHz,  $\text{CDCl}_3$ ):  $\delta$  173.0, 153.4, 147.3, 135.8, 132.2, 126.3, 111.6, 87.3, 51.9, 51.6, 48.4, 38.4, 36.8, 30.6, 23.8, 23.6, 22.7, 19.8.

**IR** (neat):  $\nu_{\text{max}}$  1842, 1734, 1590, 1372, 1274, 1132, 1012, 937, 728  $\text{cm}^{-1}$ .

**HRMS** (ESI)  $m/z$ :  $[M+Na]^+$  calcd. for  $[C_{18}H_{21}BrN_2O_7 + Na]^+$  479.0424, found 479.0475.

$[\alpha]_{589}^{25} = +74.2$  ( $c = 0.8$ ,  $CHCl_3$ ).

### Synthesis of compound (+)-24:

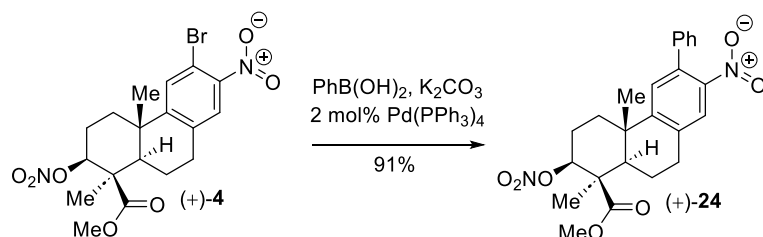

A round-bottom flask was charged with (+)-**4** (623 mg, 1.36 mmol, 1.0 equiv.) and benzene boronic acid (199 mg, 1.63 mmol, 1.2 equiv.) in a mixture of benzene (9 mL), EtOH (3 mL), and water (3 mL) at room temperature under argon atmosphere. Next, potassium carbonate (376 mg, 2.72 mmol, 2.0 equiv.) was added to the reaction mixture followed by the addition of catalyst, tetrakis(triphenylphosphine)palladium(0) (32 mg, 0.027 mmol, 0.02 equiv.) at the same temperature. Then the reaction mixture was placed on a pre-heated oil bath maintaining temperature of 80 °C. Upon completion of the reaction (10 h), as monitored by TLC analysis, it was extracted with 20% EtOAc in *n*-hexane (10 mL X 2). The combined organic layers were washed with brine (5 mL X 1) and dried over  $Na_2SO_4$  and concentrated in a rotary evaporator under reduced pressure. The crude product was purified by flash chromatography with 15% EtOAc in *n*-hexane to furnish (+)-**24** as a white solid (558 mg, 91% yield).

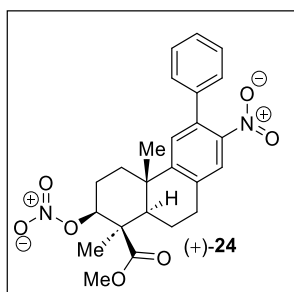

**Methyl (1*R*,2*S*,4*aS*,10*aR*)-1,4*a*-dimethyl-7-nitro-2-(nitrooxy)-6-phenyl-1,2,3,4,4*a*,9,10,10*a*-octahydrophenanthrene-1-carboxylate [(+)-**24**]:** (+)-**24** was obtained as a white solid; (MP: 148-152 °C); (1.35 mmol scale, 558 mg, 91% yield);  $R_f = 0.5$  (20% EtOAc in *n*-hexane).

**<sup>1</sup>H NMR** (500 MHz, CDCl<sub>3</sub>): δ 7.63 (s, 1H), 7.43 (d, *J* = 6.9 Hz, 3H), 7.29 (d, *J* = 7.2 Hz, 3H), 4.81 (dd, *J* = 12.4, 4.4 Hz, 1H), 3.76 (d, *J* = 1.8 Hz, 3H), 3.11 (dd, *J* = 17.6, 5.8 Hz, 1H), 2.97 (dd, *J* = 12.1, 6.6 Hz, 1H), 2.73 – 2.67 (m, 1H), 2.51 – 2.47 (m, 1H), 2.35 – 2.31 (m, 1H), 2.12 – 2.08 (m, 1H), 1.93 (dt, *J* = 13.2, 6.5 Hz, 1H), 1.70 (d, *J* = 12.2 Hz, 2H), 1.50 (s, 3H), 1.18 (s, 3H).

**<sup>13</sup>C NMR** (125 MHz, CDCl<sub>3</sub>): δ 173.1, 151.9, 146.9, 137.8, 135.5, 134.2, 129.1, 128.6, 128.1, 127.9, 124.7, 87.6, 52.0, 51.9, 48.5, 38.4, 36.9, 30.8, 23.9, 23.6, 22.7, 20.1.

**IR** (neat)  $\nu_{\max}$  1863, 1758, 1631, 1314, 1161, 1037, 987, 725 cm<sup>-1</sup>.

**HRMS** (ESI) *m/z*: [M+ H]<sup>+</sup> calcd. for [C<sub>24</sub>H<sub>26</sub>N<sub>2</sub>O<sub>7</sub> + H]<sup>+</sup> 455.1813, found 455.1822.

[ $\alpha$ ]<sub>25</sub><sup>25</sup> = +32.2 (*c* = 0.83, CHCl<sub>3</sub>).

#### Synthesis of compound (+)-S41:

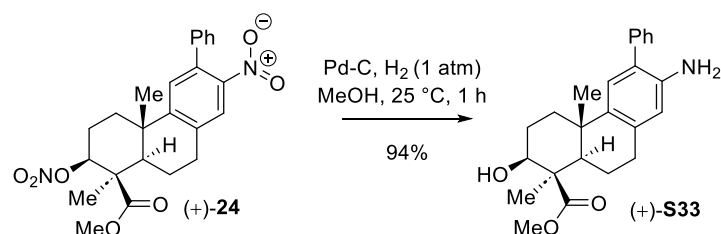

In an oven-dried round-bottom flask compound (+)-**24** (510 mg, 1.12 mmol, 1.0 equiv.) was taken in MeOH (10 mL) and degassed with N<sub>2</sub> balloon for 10 minutes. To this solution was added Pd/C (10% w/w) (51 mg) and a H<sub>2</sub> gas balloon (1 atm.) was placed with the reaction vessel and stirring continued until the full consumption of starting material (1 h), as confirmed by TLC analysis. The reaction mixture was filtered, evaporated to dryness under the reduced pressure, and it was purified by column chromatography with 30% EtOAc in *n*-hexane to afford (+)-**S33** as a yellow foam (409 mg, 96% yield).

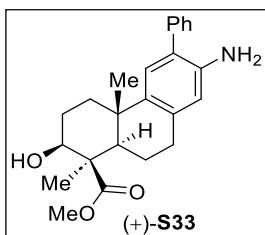

**Methyl (1*R*,2*S*,4*aS*,10*aR*)-7-amino-2-hydroxy-1,4*a*-dimethyl-6-phenyl-1,2,3,4,4*a*,9,10,10*a*-octahydrophenanthrene-1-carboxylate [(+)-S33]:** (+)-S33 was obtained as a yellow foam (1.12 mmol scale, 409 mg, 94% yield);  $R_f = 0.2$  (20% EtOAc in *n*-hexane).

**$^1\text{H NMR}$**  (400 MHz,  $\text{CDCl}_3$ ):  $\delta$  7.41 (d,  $J = 4.2$  Hz, 4H), 7.34 – 7.31 (m, 1H), 7.01 (s, 1H), 6.48 (s, 1H), 3.68 (s, 3H), 3.16 (d,  $J = 7.5$  Hz, 1H), 2.88 – 2.83 (m, 1H), 2.80 – 2.70 (m, 2H), 2.28 – 2.24 (m, 1H), 2.18 – 2.15 (m, 1H), 2.14 – 2.11 (m, 1H), 1.93 (dd,  $J = 13.3, 4.8$  Hz, 2H), 1.55 – 1.51 (m, 1H), 1.49 (s, 3H), 1.05 (s, 3H).

**$^{13}\text{C NMR}$**  (100 MHz,  $\text{CDCl}_3$ ):  $\delta$  178.6, 140.6, 139.6, 138.6, 135.6, 129.2, 128.9, 128.0, 127.2, 126.7, 115.5, 78.3, 52.8, 51.4, 49.1, 38.4, 37.6, 32.0, 29.2, 23.6, 23.0, 21.2.

**IR** (neat):  $\nu_{\text{max}}$  3642, 2871, 2738, 1817, 1681, 1216, 1163, 1067,  $\text{cm}^{-1}$ .

**HRMS** (ESI)  $m/z$ :  $[\text{M} + \text{Na}]^+$  calcd. for  $[\text{C}_{24}\text{H}_{29}\text{NO}_3 + \text{Na}]^+$  402.2040, found 402.2027.

$[\alpha]_{589}^{25} = +54.3$  ( $c = 0.85$ ,  $\text{CHCl}_3$ ).

### Synthesis of compound (+)-25a:

Following the procedure described for (+)-S4, compound (+)-25a was prepared from compound (+)-S33. (ref.2)

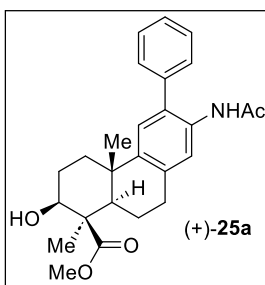

**Methyl** (1*R*,2*S*,4*aS*,10*aR*)-7-acetamido-2-hydroxy-1,4*a*-dimethyl-6-phenyl-1,2,3,4,4*a*,9,10,10*a*-octahydrophenanthrene-1-carboxylate [(+)-**25a**]: (+)-**25a** was obtained as reddish foam. (0.61 mmol scale, 224 mg, 95% yield).  $R_f = 0.2$  (30 % EtOAc in *n*-hexane).

**<sup>1</sup>H NMR** (500 MHz, CDCl<sub>3</sub>): δ 7.94 (s, 1H), 7.49 (t,  $J = 7.3$  Hz, 2H), 7.42 (d,  $J = 7.3$  Hz, 1H), 7.35 (d,  $J = 7.6$  Hz, 2H), 7.14 (s, 1H), 7.06 (s, 1H), 3.72 (s, 3H), 3.53 (d,  $J = 12.0$  Hz, 1H), 3.23 – 3.16 (m, 1H), 3.01 (dd,  $J = 17.7, 4.6$  Hz, 1H), 2.87 (td,  $J = 17.5, 15.1, 6.0$  Hz, 1H), 2.30 (d,  $J = 13.2$  Hz, 1H), 2.26 – 2.16 (m, 2H), 2.02 (s, 3H), 2.00 – 1.93 (m, 2H), 1.53 (s, 3H), 1.46 (d,  $J = 7.1$  Hz, 1H), 1.09 (s, 3H).

**<sup>13</sup>C NMR** (125 MHz, CDCl<sub>3</sub>): δ 178.5, 168.3, 143.7, 138.5, 135.6, 132.1, 130.6, 129.3, 129.0, 127.8, 127.4, 121.9, 78.1, 52.4, 51.3, 49.0, 38.1, 37.9, 32.1, 29.0, 24.5, 23.5, 22.9, 21.0.

**IR** (neat):  $\nu_{\max}$  3337, 2913, 2798, 1863, 1745, 1187, 1142, 881 cm<sup>-1</sup>.

**HRMS** (ESI)  $m/z$ : [M+ H]<sup>+</sup> calcd. for [C<sub>26</sub>H<sub>31</sub>O<sub>4</sub>N + H]<sup>+</sup> 422.2326, found 422.2351.

$[\alpha]_{589}^{25} = +60.50$  ( $c = 0.67$ , CHCl<sub>3</sub>).

### Synthesis of compound (+)-**25b**:

Following the procedure described for (+)-**S4**, compound (+)-**25b** was prepared from compound (+)-**S33**. (ref.3)

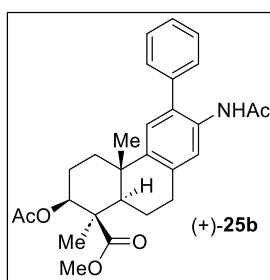

**Methyl** (1*R*,2*S*,4*aS*,10*aR*)-7-acetamido-2-acetoxy-1,4*a*-dimethyl-6-phenyl-1,2,3,4,4*a*,9,10,10*a*-octahydrophenanthrene-1-carboxylate [(+)-**25b**]: (+)-**25b** was obtained as white foam. (0.37 mmol scale, 161 mg, 94% yield).  $R_f = 0.18$  (30 % EtOAc in *n*-hexane).

**<sup>1</sup>H NMR** (500 MHz, CDCl<sub>3</sub>): δ 7.93 (s, 1H), 7.48 (t,  $J = 7.4$  Hz, 2H), 7.41 (t,  $J = 7.4$  Hz, 1H), 7.38 – 7.34 (m, 2H), 7.12 (s, 1H), 7.06 (s, 1H), 4.63 (dd,  $J = 12.2, 4.6$  Hz, 1H), 3.73 (s, 3H),



3.07 – 3.00 (m, 1H), 2.90 (ddd,  $J = 17.9, 12.1, 6.8$  Hz, 1H), 2.59 – 2.49 (m, 1H), 2.35 (dt,  $J = 13.3, 3.6$  Hz, 1H), 2.26 – 2.19 (m, 1H), 2.11 (s, 3H), 2.02 (s, 3H), 1.94 – 1.89 (m, 1H), 1.86 – 1.81 (m, 1H), 1.63 (ddd,  $J = 12.3, 7.7, 2.9$  Hz, 2H), 1.35 (s, 3H), 1.14 (s, 3H).

$^{13}\text{C}$  NMR (125 MHz,  $\text{CDCl}_3$ ):  $\delta$  174.3, 171.0, 168.3, 144.2, 138.5, 135.3, 132.2, 130.5, 129.3, 129.0, 127.8, 126.8, 121.9, 79.1, 51.8, 51.2, 48.2, 37.7, 37.2, 31.2, 24.7, 24.5, 23.7, 23.0, 21.4, 20.5.

IR (neat):  $\nu_{\text{max}}$  2995, 2751, 1832, 1736, 1699, 1617, 1267, 1188, 730  $\text{cm}^{-1}$ .

HRMS (ESI)  $m/z$ :  $[\text{M} + \text{H}]^+$  calcd. for  $[\text{C}_{28}\text{H}_{33}\text{O}_5\text{N} + \text{H}]^+$  464.2437, found 464.2425.

$[\alpha]_{589}^{25} = +52.00$  ( $c = 0.64$ ,  $\text{CHCl}_3$ ).

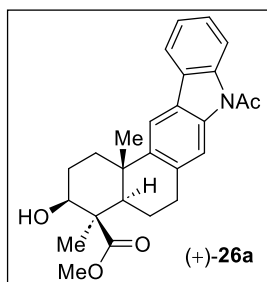

**Methyl** (3*S*,4*R*,4*aR*,13*bS*)-8-acetyl-3-hydroxy-4,13*b*-dimethyl-2,3,4,4*a*,5,6,8,13*b*-octahydro-1*H*-naphtho[2,1-*b*]carbazole-4-carboxylate [(+)-26a]: (+)-26a was obtained as white foam (0.18 mmol scale of reaction; 60 mg; 79%).  $R_f = 0.32$  (20% EtOAc in *n*-hexane).

$^1\text{H}$  NMR (400 MHz,  $\text{CDCl}_3$ ):  $\delta$  8.14 (d,  $J = 8.3$  Hz, 1H), 7.92 (ddd,  $J = 7.6, 1.4, 0.7$  Hz, 1H), 7.86 (s, 1H), 7.85 (s, 1H), 7.44 – 7.39 (m, 1H), 7.34 (td,  $J = 7.4, 1.0$  Hz, 1H), 3.70 (s, 3H), 3.55 (d,  $J = 12.0$  Hz, 1H), 3.21 (tt,  $J = 7.5, 3.3$  Hz, 1H), 3.15 – 3.07 (m, 1H), 2.98 (ddd,  $J = 17.2, 12.6, 5.9$  Hz, 1H), 2.83 (d,  $J = 1.7$  Hz, 3H), 2.50 (dd,  $J = 13.2, 3.6$  Hz, 1H), 2.27 – 2.20 (m, 2H), 2.05 – 1.99 (m, 2H), 1.73 – 1.66 (m, 1H), 1.63 (dd,  $J = 13.4, 3.9$  Hz, 1H), 1.52 (s, 3H), 1.14 (s, 3H).

$^{13}\text{C}$  NMR (126 MHz,  $\text{CDCl}_3$ ):  $\delta$  178.5, 170.0, 143.6, 138.9, 137.1, 135.1, 127.0, 126.7, 125.0, 123.6, 119.5, 116.6, 116.3, 116.2, 78.1, 52.5, 51.4, 49.1, 38.6, 38.3, 33.2, 29.2, 27.7, 23.6, 23.5, 21.2.

**IR** (neat)  $\nu_{\max}$  3343, 2831, 1648, 1517, 1488, 1372, 914  $\text{cm}^{-1}$ .

**HRMS** (ESI)  $m/z$ :  $[M+Na]^+$  calcd. for  $[\text{C}_{26}\text{H}_{29}\text{O}_4\text{N} + \text{Na}]^+$  442.1989, found 442.1992.

$[\alpha]_{589}^{25} = +112.7$  ( $c = 0.78$ ,  $\text{CHCl}_3$ ).

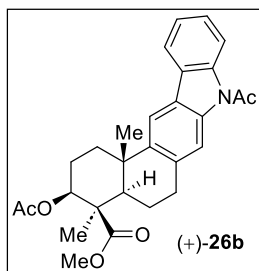

**Methyl** (3*S*,4*R*,4*aR*,13*bS*)-3-acetoxy-8-acetyl-4,13*b*-dimethyl-2,3,4,4*a*,5,6,8,13*b*-octahydro-1*H*-naphtho[2,1-*b*]carbazole-4-carboxylate [(+)-26*b*]: (+)-26*b* was obtained as a yellow gel (0.27 mmol scale of reaction; 101 mg; 81%).  $R_f = 0.35$  (30% EtOAc in *n*-hexane).

**$^1\text{H}$  NMR** (400 MHz,  $\text{CDCl}_3$ ):  $\delta$  8.13 (d,  $J = 8.3$  Hz, 1H), 7.91 (ddd,  $J = 7.6, 1.4, 0.7$  Hz, 1H), 7.86 (s, 1H), 7.83 (s, 1H), 4.67 – 4.63 (m, 1H), 3.71 (s, 3H), 3.17 – 3.09 (m, 1H), 3.01 (ddd,  $J = 17.3, 11.8, 6.5$  Hz, 1H), 2.82 (d,  $J = 1.1$  Hz, 3H), 2.63 – 2.53 (m, 2H), 2.24 (ddt,  $J = 13.7, 6.7, 1.9$  Hz, 1H), 2.11 (s, 3H), 1.98 – 1.93 (m, 1H), 1.87 (ddd,  $J = 12.3, 6.2, 1.6$  Hz, 1H), 1.70 (d,  $J = 10.8$  Hz, 1H), 1.67 – 1.63 (m, 1H), 1.34 (s, 3H), 1.20 – 1.18 (m, 3H).

**$^{13}\text{C}$  NMR** (125 MHz,  $\text{CDCl}_3$ ):  $\delta$  174.3, 171.0, 170.0, 144.1, 138.9, 137.1, 134.7, 126.9, 126.7, 124.9, 123.6, 119.5, 116.2, 116.2, 116.0, 79.0, 51.9, 51.3, 48.3, 38.2, 37.6, 32.3, 27.6, 24.9, 23.8, 23.4, 21.4, 20.7.

**IR** (neat)  $\nu_{\max}$  2942, 2741, 1837, 1701, 1123, 1498, 1063, 918  $\text{cm}^{-1}$ .

**HRMS** (ESI)  $m/z$ :  $[M+Na]^+$  calcd. for  $[\text{C}_{28}\text{H}_{31}\text{O}_5\text{N} + \text{Na}]^+$  484.2100, found 484.2101.

$[\alpha]_{589}^{25} = +60.7$  ( $c = 0.68$ ,  $\text{CHCl}_3$ ).

**Preparation of (+)-Oridamycin A methyl ester [(+)-2b] from (+)-26b:** Following the procedure mentioned for compound (+)-6 deacetylation to addressed xiamycin A methylester [(+)-2b], (+)-oridamycin A methyl ester [(+)-2d] was prepared from (+)-26b.

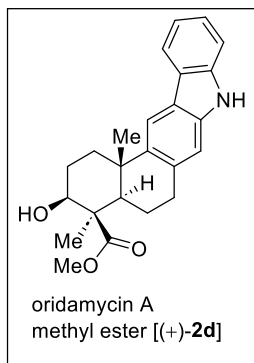

**Methyl (3*S*,4*R*,4*aR*,13*bS*)-3-hydroxy-4,13*b*-dimethyl-2,3,4,4*a*,5,6,8,13*b*-octahydro-1*H*-naphtho[2,1-*b*]carbazole-4-carboxylate [(+)-2d]:** Oridamycin A methylester (+)-2d was obtained as white solid [MP: 106–108 °C] (0.173 mmol scale, 63.8 mg, 98% yield).  $R_f = 0.25$  (40% EtOAc in *n*-hexane).

**$^1\text{H NMR}$**  (500 MHz,  $\text{CHCl}_3$ ):  $\delta$  8.02 (d,  $J = 8.1$  Hz, 1H), 7.99 (d,  $J = 2.3$  Hz, 1H), 7.87 (s, 1H), 7.38 (d,  $J = 4.6$  Hz, 2H), 7.21 (dd,  $J = 8.3, 5.7$  Hz, 1H), 7.09 (s, 1H), 3.78 (dd,  $J = 26.0, 2.6$  Hz, 1H), 3.74 (s, 3H), 3.28 – 3.21 (m, 1H), 3.17 – 3.09 (m, 1H), 3.03 (td,  $J = 16.8, 14.9, 5.8$  Hz, 1H), 2.59 (dd,  $J = 13.1, 3.2$  Hz, 1H), 2.27 (q,  $J = 9.2, 5.3$  Hz, 2H), 2.11 – 2.02 (m, 2H), 1.68 (dd,  $J = 15.8, 12.1$  Hz, 1H), 1.57 (s, 3H), 1.20 (d,  $J = 2.4$  Hz, 3H).

**$^{13}\text{C NMR}$**  (125 MHz,  $\text{CD}_3\text{OD}$ ):  $\delta$  178.6, 140.1, 139.5, 138.2, 133.7, 125.5, 123.5, 122.3, 120.0, 119.2, 117.1, 110.5, 109.7, 78.2, 52.9, 51.3, 49.1, 39.0, 38.4, 33.1, 29.3, 23.8, 23.7, 21.3.

**IR** (neat)  $\nu_{\text{max}}$  3361, 2974, 2838, 1712, 1667, 1523, 1412, 1233, 743, 591  $\text{cm}^{-1}$ .

**HRMS** (ESI)  $m/z$ :  $[\text{M} + \text{H}]^+$  calcd. for  $[\text{C}_{24}\text{H}_{27}\text{O}_3\text{N} + \text{H}]^+$  378.2069, found 378.2070.

$[\alpha]_{589}^{25} = +76.7$  ( $c = 0.65$ ,  $\text{CHCl}_3$ ).

**Total Synthesis of (+)-Oridamycin A [(+)-2c] from [(+)-2d]:** Following the above-mentioned procedure for compound (+)-2b to synthesize the xiamycin A [(+)-2a] via

saponification, the total synthesis of (+)-oridamycin A [(+)-**2c**] was accomplished from oridamycin A methylester [(+)-**2d**] via saponification.

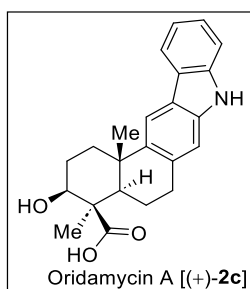

(3*S*,4*S*,4*aR*,13*bS*)-**3-Hydroxy-4,13b-dimethyl-2,3,4,4a,5,6,8,13b-octahydro-1H-naphtho[2,1-*b*]carbazole-4-carboxylic acid [(+)-**2c****]: Oridamycin A [(+)-**2c**] was obtained as white foam (0.117 mmol scale, 32 mg, 75% yield).  $R_f = 0.2$  (50% EtOAc in *n*-hexane).

**<sup>1</sup>H NMR** (500 MHz, CD<sub>3</sub>OD):  $\delta$  7.98 (d,  $J = 6.7$  Hz, 2H), 7.36 (d,  $J = 8.1$  Hz, 1H), 7.30 (t,  $J = 7.6$  Hz, 1H), 7.10 (t,  $J = 7.5$  Hz, 1H), 7.07 (s, 1H), 3.27 (dd,  $J = 12.2, 4.5$  Hz, 1H), 3.10 (dd,  $J = 16.2, 5.1$  Hz, 1H), 3.02 – 2.93 (m, 1H), 2.61 (dt,  $J = 13.1, 3.6$  Hz, 1H), 2.39 – 2.29 (m, 1H), 2.25 (dd,  $J = 14.1, 6.2$  Hz, 1H), 2.15 (qd,  $J = 12.8, 5.2$  Hz, 1H), 1.95 (dq,  $J = 12.4, 3.9$  Hz, 1H), 1.65 – 1.59 (m, 1H), 1.55 (d,  $J = 4.1$  Hz, 1H), 1.52 (s, 3H), 1.29 (s, 3H).

**<sup>13</sup>C NMR** (125 MHz, CD<sub>3</sub>OD):  $\delta$  181.0, 142.0, 140.3, 140.0, 134.4, 126.0, 124.5, 123.1, 120.5, 119.3, 117.4, 111.3, 110.6, 79.0, 54.0, 49.7, 39.9, 39.5, 33.9, 30.2, 24.7, 24.5, 22.4.

**IR** (neat)  $\nu_{\max}$  3364, 2937, 2218, 1653, 1437, 1031, 929, 869 cm<sup>-1</sup>.

**HRMS** (ESI)  $m/z$ :  $[M + Na]^+$  calcd. for  $[C_{23}H_{25}O_3N + Na]^+$  386.1727, found 386.1736.

$[\alpha]_{589}^{25} = +92.1$  ( $c = 0.73$ , CH<sub>3</sub>OH); lit.<sup>[7]</sup>  $[\alpha]_D^{22} = +100.3$  ( $c = 0.4$ , CH<sub>3</sub>OH).

**Comparison of <sup>1</sup>H-NMR Data of (+)-Oridamycin A [(+)-**2c**]** of this report with natural (+)-**2a** by Takada<sup>[7]</sup> and with literature by Sarpong<sup>[6]</sup> and Krische<sup>[8]</sup>:

Takada's report on the isolation of (+)-Oridamycin A [(+)-**2c**]  
(<sup>1</sup>H-NMR, 600 MHz, CD<sub>3</sub>OD)<sup>[7]</sup>

| $\delta$ (ppm) | Int. | mult. | $J$ (Hz)             |
|----------------|------|-------|----------------------|
| 7.93           | 1H   | d     | $J = 8.0$ Hz         |
| 7.93           | 1H   | s     | -                    |
| 7.32           | 1H   | d     | $J = 8.0$ Hz         |
| 7.25           | 1H   | dt    | $J = 8.1, 1.4$ Hz    |
| 7.05           | 1H   | dt    | $J = 8.1, 1.4$ Hz    |
| 7.03           | 1H   | s     | -                    |
| 3.22           | 1H   | dd    | $J = 12.2, 4.6$ Hz   |
| 3.06           | 1H   | ddd   | $J = 16.3, 5.4, 2.3$ |
| 2.94           | 1H   | ddd   | $J = 16.3, 5.4, 2.3$ |
| 2.57           | 1H   | dt    | $J = 13.6, 3.6$ Hz   |
| 2.30           | 1H   | dq    | $J = 12.6, 2.3$ Hz   |
| 2.23           | 1H   | m     | -                    |
| 2.09           | 1H   | dt    | $J = 12.7, 5.4$      |
| 1.90           | 1H   | qd    | $J = 13.6, 3.6$ Hz   |
| 1.58           | 1H   | dt    | $J = 13.6, 4.1$ Hz   |
| 1.56           | 1H   | m     | -                    |
| 1.48           | 3H   | s     | -                    |
| 1.26           | 3H   | s     | -                    |

| Sarpong's Synthesis of (+)-Oridamycin A [(+)- <b>2c</b> ]<br>( <sup>1</sup> H-NMR, 700 MHz, CD <sub>3</sub> OD) <sup>[6]</sup> |      |       |                    |
|--------------------------------------------------------------------------------------------------------------------------------|------|-------|--------------------|
| $\delta$ (ppm)                                                                                                                 | Int. | mult. | $J$ (Hz)           |
| 7.96                                                                                                                           | 1H   | d     | $J = 8.0$ Hz       |
| 7.96                                                                                                                           | 1H   | s     | -                  |
| 7.34                                                                                                                           | 1H   | d     | $J = 8.0$ Hz       |
| 7.28                                                                                                                           | 1H   | t     | $J = 7.6$ Hz       |
| 7.08                                                                                                                           | 1H   | d     | $J = 7.6$ Hz       |
| 7.07                                                                                                                           | 1H   | s     | -                  |
| 3.26                                                                                                                           | 1H   | d     | $J = 11.5$ Hz      |
| 3.10                                                                                                                           | 1H   | dd    | $J = 16.2, 4.6$ Hz |

|           |    |    |                    |
|-----------|----|----|--------------------|
| 2.98      | 1H | dd | $J = 16.5, 4.6$ Hz |
| 2.60      | 1H | dd | $J = 13.2, 2.0$ Hz |
| 2.38-2.31 | 1H | m  | -                  |
| 2.25      | 1H | dd | $J = 13.9, 6.0$ Hz |
| 2.20-2.15 | 1H | m  | -                  |
| 1.98-1.92 | 1H | m  | -                  |
| 1.65-1.60 | 1H | m  | -                  |
| 1.57-1.45 | 4H | m  | -                  |
| 1.29      | 3H | s  | -                  |

| Krische's report (+)-Oridamycin A [(+)- <b>2c</b> ]<br>( <sup>1</sup> H-NMR, 500 MHz, CD <sub>3</sub> OD) <sup>[8]</sup> |      |       |                               |
|--------------------------------------------------------------------------------------------------------------------------|------|-------|-------------------------------|
| δ (ppm)                                                                                                                  | Int. | mult. | $J$ (Hz)                      |
| 7.96                                                                                                                     | 1H   | dt    | $J = 8.1, 1.0$ Hz             |
| 7.96                                                                                                                     | 1H   | s     | -                             |
| 7.34                                                                                                                     | 1H   | dt    | $J = 8.1, 0.9$ Hz             |
| 7.28                                                                                                                     | 1H   | ddd   | $J = 8.1, 7.1, 1.2$ Hz        |
| 7.08                                                                                                                     | 1H   | ddd   | $J = 8.1, 7.1, 1.2$ Hz        |
| 7.06                                                                                                                     | 1H   | s     | -                             |
| 3.25                                                                                                                     | 1H   | dd    | $J = 12.2, 4.4$ Hz            |
| 3.08                                                                                                                     | 1H   | ddd   | $J = 17.2, 5.6, 1.9$ Hz       |
| 2.97                                                                                                                     | 1H   | dddd  | $J = 16.5, 12.7, 6.2, 1.3$ Hz |
| 2.60                                                                                                                     | 1H   | dt    | $J = 13.2, 3.7$ Hz            |
| 2.32                                                                                                                     | 1H   | qd    | $J = 13.3, 3.8$ Hz            |
| 2.28-2.19                                                                                                                | 1H   | m     | -                             |
| 2.20-2.07                                                                                                                | 1H   | m     | -                             |
| 1.93                                                                                                                     | 1H   | dq    | $J = 13.1, 3.9$ Hz            |
| 1.61                                                                                                                     | 1H   | td    | $J = 13.5, 3.9$ Hz            |
| 1.52                                                                                                                     | 1H   | dd    | $J = 12.2, 2.1$ Hz            |
| 1.50                                                                                                                     | 3H   | s     | -                             |
| 1.28                                                                                                                     | 3H   | s     | -                             |

| This Synthesis of (+)-Oridamycin A [(+)- <b>2c</b> ]<br>( <sup>1</sup> H-NMR, 500 MHz, CD <sub>3</sub> OD) |      |       |                         |
|------------------------------------------------------------------------------------------------------------|------|-------|-------------------------|
| δ (ppm)                                                                                                    | Int. | mult. | <i>J</i> (Hz)           |
| 7.98                                                                                                       | 2H   | d     | <i>J</i> = 6.7 Hz       |
| 7.36                                                                                                       | 1H   | d     | <i>J</i> = 8.1 Hz       |
| 7.30                                                                                                       | 1H   | t     | <i>J</i> = 7.6 Hz       |
| 7.10                                                                                                       | 1H   | t     | <i>J</i> = 7.5 Hz       |
| 7.07                                                                                                       | 1H   | s     | -                       |
| 3.27                                                                                                       | 1H   | dd    | <i>J</i> = 12.2, 4.5 Hz |
| 3.10                                                                                                       | 1H   | dd    | <i>J</i> = 16.2, 5.1 Hz |
| 3.02 – 2.93                                                                                                | 1H   | m     | -                       |
| 2.61                                                                                                       | 1H   | dt    | <i>J</i> = 13.1, 3.6 Hz |
| 2.39 – 2.29                                                                                                | 1H   | m     | -                       |
| 2.25                                                                                                       | 1H   | dd    | <i>J</i> = 14.1, 6.2 Hz |
| 2.15                                                                                                       | 1H   | qd    | <i>J</i> = 12.8, 5.2 Hz |
| 1.95                                                                                                       | 1H   | dq    | <i>J</i> = 12.4, 3.9 Hz |
| 1.65 – 1.59                                                                                                | 1H   | m     | -                       |
| 1.55                                                                                                       | 1H   | d     | <i>J</i> = 4.1 Hz       |
| 1.52                                                                                                       | 3H   | s     | -                       |
| 1.29                                                                                                       | 3H   | s     | -                       |

### Comparison of <sup>13</sup>C-NMR Data:

| Takada's report<br>(+)-Oridamycin A<br>[(+)- <b>2c</b> ]<br>( <sup>13</sup> C-NMR, 151<br>MHz, CD <sub>3</sub> OD) <sup>[7]</sup> | Sarpong's report<br>(+)-Oridamycin A<br>[(+)- <b>2c</b> ] ( <sup>13</sup> C-<br>NMR, 176 MHz,<br>CD <sub>3</sub> OD) <sup>[6]</sup> | Krische's report<br>(+)-Oridamycin A<br>[(+)- <b>2c</b> ] ( <sup>13</sup> C-NMR,<br>125 MHz,<br>CD <sub>3</sub> OD) <sup>[8]</sup> | This report (+)-<br>Oridamycin A<br>[(+)- <b>2c</b> ]<br>( <sup>13</sup> C-NMR, 125<br>MHz, CD <sub>3</sub> OD) |
|-----------------------------------------------------------------------------------------------------------------------------------|-------------------------------------------------------------------------------------------------------------------------------------|------------------------------------------------------------------------------------------------------------------------------------|-----------------------------------------------------------------------------------------------------------------|
| 181.0                                                                                                                             | 181.0                                                                                                                               | 181.0                                                                                                                              | 181.0                                                                                                           |
| 142.0                                                                                                                             | 142.0                                                                                                                               | 142.1                                                                                                                              | 142.0                                                                                                           |
| 140.3                                                                                                                             | 140.3                                                                                                                               | 140.4                                                                                                                              | 140.3                                                                                                           |
| 140.1                                                                                                                             | 140.1                                                                                                                               | 140.1                                                                                                                              | 140.0                                                                                                           |

|       |       |       |       |
|-------|-------|-------|-------|
| 134.5 | 134.5 | 134.5 | 134.4 |
| 126.1 | 126.0 | 126.1 | 126.0 |
| 124.6 | 124.6 | 124.6 | 124.5 |
| 123.2 | 123.2 | 123.3 | 123.1 |
| 120.5 | 120.6 | 120.6 | 120.5 |
| 119.3 | 119.3 | 119.3 | 119.3 |
| 117.5 | 117.5 | 117.5 | 117.4 |
| 111.4 | 111.4 | 111.4 | 111.3 |
| 110.7 | 110.7 | 110.7 | 110.6 |
| 79.1  | 79.0  | 79.1  | 79.0  |
| 54.1  | 54.0  | 54.1  | 54.0  |
| 48.7  | 49.8  | 49.8  | 49.7  |
| 40.0  | 39.9  | 40.0  | 39.9  |
| 39.6  | 39.6  | 39.6  | 39.5  |
| 34.0  | 34.0  | 34.0  | 33.9  |
| 30.3  | 30.2  | 30.3  | 30.2  |
| 24.8  | 24.8  | 24.8  | 24.7  |
| 24.6  | 24.5  | 24.6  | 24.5  |
| 22.5  | 22.5  | 22.5  | 22.4  |

### Synthesis of *bis*-nitro compound (27) via double Suzuki-Miyaura coupling:

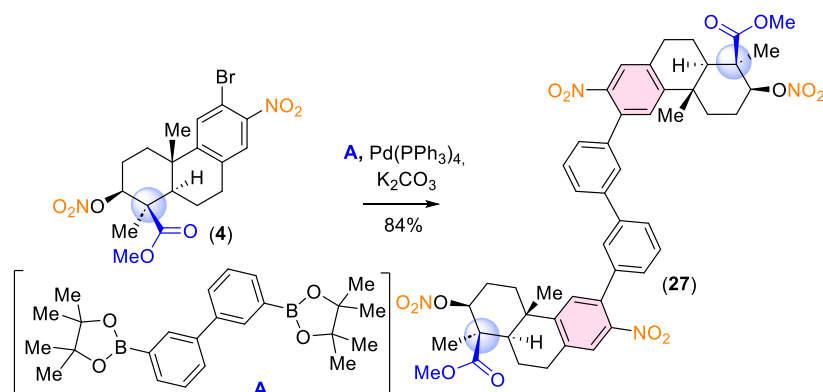

A round-bottom flask was charged with (+)-4 (435 mg, 0.951 mmol, 1.0 equiv.) and 3,3'-bis(4,4,5,5-tetramethyl-1,3,2-dioxaborolan-2-yl)-1,1'-biphenyl (193 mg, 0.475 mmol, 0.5 equiv.) in a mixture of benzene (3 mL), EtOH (1 mL), and water (1 mL) at room temperature



under argon atmosphere. Next, potassium carbonate (263 mg, 1.9 mmol, 2.0 equiv.) was added to the reaction mixture followed by the addition of catalyst, tetrakis(triphenylphosphine)palladium(0) (27 mg, 0.024 mmol, 0.025 equiv.) at the same temperature. Then the reaction mixture was placed on a pre-heated oil bath maintaining temperature of 80 °C. Upon completion of the reaction (3 h), as monitored by TLC analysis, it was extracted with EtOAc (10 mL X 2). The combined organic layers were washed with brine (5 mL X 1) and dried over Na<sub>2</sub>SO<sub>4</sub> and concentrated in a rotary evaporator under reduced pressure. The crude product was purified by flash chromatography with 20-30% EtOAc in *n*-hexane to furnish (+)-**27** as a white solid (361.0 mg, 84% yield).

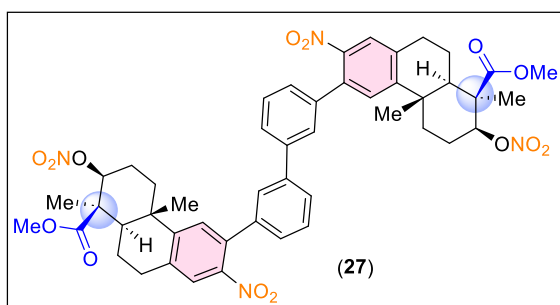

**Dimethyl 6,6'-([1,1'-biphenyl]-3,3'-diyl)(1*R*,1'*R*,2*S*,2'*S*,4*aS*,4*a*'*S*,10*aR*,10*a*'*R*)-bis(1,4a-dimethyl-7-nitro-2-(nitrooxy)-1,2,3,4,4a,9,10,10a-octahydrophenanthrene-1-carboxylate) [(+)-**27**]: (+)-**27** was obtained as colorless foam (0.475 mmol scale of reaction; 361.0 mg; 84%). *R<sub>f</sub>* = 0.22 (20 % EtOAc in *n*-hexane).**

**<sup>1</sup>H NMR** (500 MHz, CDCl<sub>3</sub>): δ 7.63 (s, 1H), 7.59 (ddd, *J* = 7.8, 1.8, 1.1 Hz, 1H), 7.48 (dd, *J* = 7.7, 0.5 Hz, 1H), 7.45 (dt, *J* = 1.8, 0.9 Hz, 1H), 7.32 (s, 1H), 7.29 – 7.21 (m, 1H), 4.78 (dd, *J* = 12.2, 4.4 Hz, 1H), 3.73 (s, 3H), 3.08 (dd, *J* = 17.5, 5.7 Hz, 1H), 2.93 (ddd, *J* = 17.9, 12.1, 6.7 Hz, 1H), 2.73 – 2.61 (m, 1H), 2.51 – 2.44 (m, 1H), 2.33 – 2.26 (m, 1H), 2.11 – 2.04 (m, 1H), 1.90 (ddd, *J* = 12.3, 6.0, 1.7 Hz, 1H), 1.76 – 1.65 (m, 2H), 1.47 (s, 3H), 1.15 (s, 3H).

**<sup>13</sup>C{<sup>1</sup>H} NMR** (126 MHz, CDCl<sub>3</sub>): δ 173.1, 152.1, 146.8, 141.1, 138.4, 135.7, 134.0, 129.2, 129.1, 127.2, 127.0, 124.8, 87.6, 52.0, 51.9, 48.5, 38.5, 37.0, 30.8, 23.8, 23.6, 22.7, 20.1.

**IR** (neat): *ν*<sub>max</sub> 3334, 2857, 1733, 1635, 1378, 1223, 931, 751 cm<sup>-1</sup>.

**HRMS** (ESI) *m/z*: [M+ NH<sub>4</sub>]<sup>+</sup> calcd. for [C<sub>48</sub>H<sub>50</sub>N<sub>4</sub>O<sub>14</sub> + NH<sub>4</sub>]<sup>+</sup> 924.3667, found 924.3683.

$[\alpha]_{589}^{25} = +105.0$  ( $c = 0.2$ ,  $\text{CHCl}_3$ ).

**Synthesis of *bis*-acetenalide compound (**28**) from compound (**27**):**

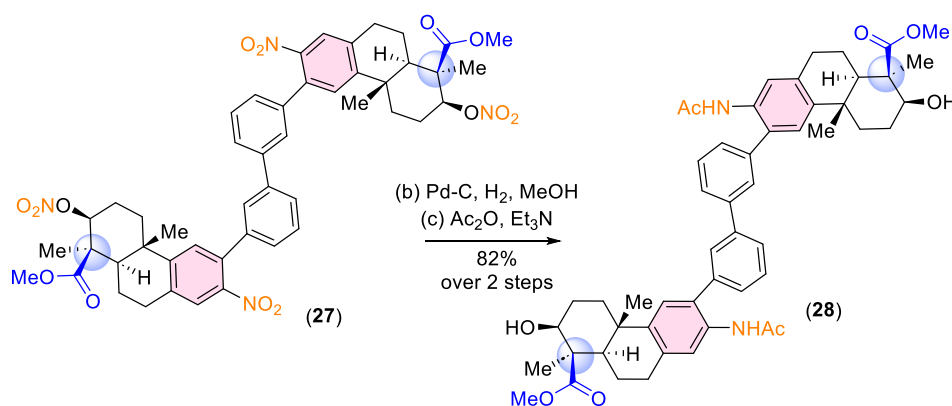

In an oven-dried round-bottom flask *bis*-nitro compound (+)-**27** (155 mg, 0.171 mmol, 1.0 equiv.) was taken in MeOH (5 mL) and degassed with N<sub>2</sub> balloon for 10 minutes. To this solution Pd/C (20% w/w) (32 mg) was added and a H<sub>2</sub> gas balloon (1 atm.) was placed with the reaction vessel and stirring continued until the full consumption of starting material (4 h), as confirmed by TLC analysis. The reaction mixture was filtered, evaporated to dryness under the reduced pressure. The crude *bis*-aniline was charged for the next step without further purification.

In an oven dried round-bottom flask *bis*-aniline was taken in CH<sub>2</sub>Cl<sub>2</sub> (3 mL) and Et<sub>3</sub>N (48  $\mu$ L, 0.342 mmol., 2.1 equiv.) was added to the reaction mixture. Next, acetic anhydride (32  $\mu$ L, 0.342 mmol., 2.1 equiv.) was added to the reaction mixture at 25 °C and stirring continued until the full consumption of starting material. Upon completion (6 h), as monitored by TLC analysis, it was extracted with CH<sub>2</sub>Cl<sub>2</sub> (5 mL X 2). The organic layers were dried over Na<sub>2</sub>SO<sub>4</sub> and concentrated in a rotary evaporator under reduced pressure. The crude product was purified by flash column chromatography with 60-80% EtOAc in *n*-hexane to afford (+)-**28** as yellow foam (117 mg, 82% over 2 steps).

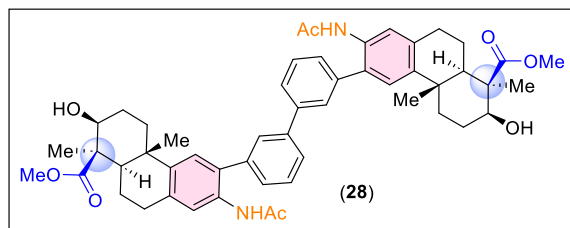

**Dimethyl 6,6'-([1,1'-biphenyl]-3,3'-diyl)(1*R*,1'*R*,2*S*,2'*S*,4*aS*,4*a*'*S*,10*aR*,10*a*'*R*)-bis(7-acetamido-2-hydroxy-1,4*a*-dimethyl-1,2,3,4,4*a*,9,10,10*a*-octahydrophenanthrene-1-carboxylate) [(+)-**28**]: (+)-**28** was obtained as yellowish foam (0.171 mmol scale of reaction; 117 mg; 82%).  $R_f = 0.35$  (70 % EtOAc in *n*-hexane).**

$^1\text{H NMR}$  (500 MHz,  $\text{CDCl}_3$ ):  $\delta$  7.87 (s, 1H), 7.61 (d,  $J = 8.0$  Hz, 1H), 7.59 – 7.51 (m, 2H), 7.34 (d,  $J = 7.4$  Hz, 1H), 7.15 (s, 1H), 7.07 (s, 1H), 3.69 (s, 3H), 3.52 (d,  $J = 11.9$  Hz, 1H), 3.15 (td,  $J = 12.1, 4.6$  Hz, 1H), 2.99 (dd,  $J = 17.2, 5.2$  Hz, 1H), 2.84 (ddd,  $J = 17.5, 12.7, 6.0$  Hz, 1H), 2.28 – 2.15 (m, 2H), 2.09 (d,  $J = 9.7$  Hz, 1H), 2.00 (s, 3H), 1.97 – 1.92 (m, 2H), 1.87 (d,  $J = 6.7$  Hz, 1H), 1.49 (s, 3H), 1.06 (s, 3H).

$^{13}\text{C}\{^1\text{H}\}$  NMR (125 MHz,  $\text{CDCl}_3$ ):  $\delta$  178.6, 168.5, 144.1, 141.6, 139.3, 136.0, 132.1, 130.7, 129.6, 128.5, 128.2, 127.5, 126.7, 122.5, 78.1, 52.4, 51.5, 49.0, 38.2, 38.0, 32.1, 29.1, 24.6, 23.6, 23.0, 21.0.

**IR** (neat)  $\nu_{\text{max}}$  3328, 2853, 1733, 1648, 1345, 1287, 991, 725  $\text{cm}^{-1}$ .

**HRMS** (ESI)  $m/z$ :  $[\text{M} + \text{H}]^+$  calcd. for  $[\text{C}_{52}\text{H}_{60}\text{O}_8\text{N}_2 + \text{H}]^+$  841.4428, found 841.4435.

$[\alpha]_{589}^{25} = +97.35$  ( $c = 0.7$ ,  $\text{CHCl}_3$ ).

#### Intramolecular oxidative C-N coupling of *bis*-acetenalide compound (**28**):

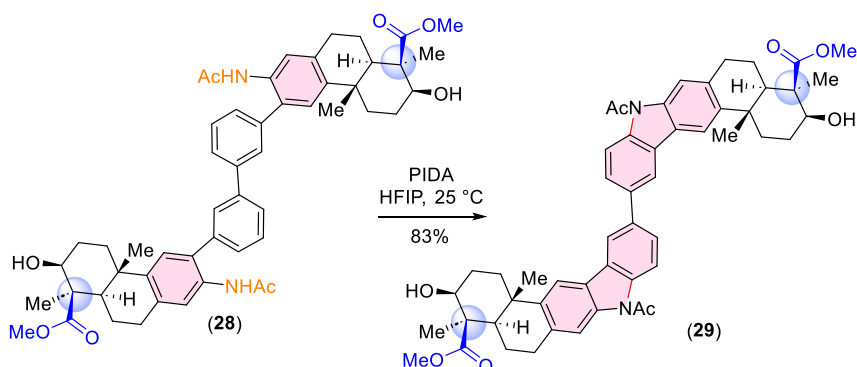

In an oven-dried round-bottom flask *bis*-acetanilide (64 mg, 0.076 mmol, 1.0 equiv.) was taken in 1,1,1,3,3,3- hexafluoropropan-2-ol (2 mL) under an inert atmosphere. To the solution  $\text{PhI}(\text{OAc})_2$  (59 mg, 0.076 mmol, 2.4 equiv.) was added and stirred the mixture at room temperature. After completion of reaction (monitored by TLC), it was quenched with saturated  $\text{Na}_2\text{S}_2\text{O}_3$  solution then reaction mixture was extracted with  $\text{CH}_2\text{Cl}_2$  (5 mL X 3). The organic layers were dried over  $\text{Na}_2\text{SO}_4$  and concentrated on rotary evaporator under reduced pressure. Then the crude product was purified by flash column chromatography with 70- 80% EtOAc in *n*-Hexane to afford carbazole compounds **29**.

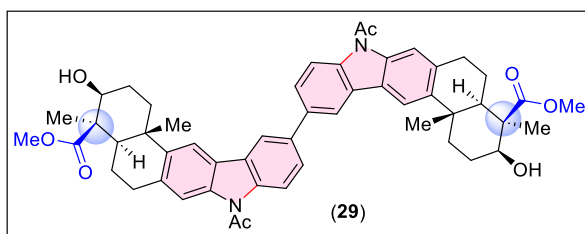

**Dimethyl (3*S*,3'*S*,4*R*,4*aR*,4'*R*,4'*aR*,13*bS*,13'*bS*)-8,8'-diacetyl-3,3'-dihydroxy-4,4',13*b*,13'*b*-tetramethyl-2,2',3,3',4,4*a*,4',4'*a*,5,5',6,6',8,8',13*b*,13'*b*-hexadecahydro-1*H*,1'*H*-[11,11'-binaphtho[2,1-*b*]carbazole]-4,4'-dicarboxylate [(+)-**29**]:** (+)-**29** was obtained as white foam (0.045 mmol scale of reaction; 35 mg; 86%).  $R_f = 0.3$  (40 % EtOAc in *n*-hexane).

$^1\text{H NMR}$  (500 MHz,  $\text{CDCl}_3$ ):  $\delta$  8.25 (d,  $J = 8.8$  Hz, 1H), 8.21 (d,  $J = 1.8$  Hz, 1H), 7.97 (d,  $J = 4.9$  Hz, 1H), 7.88 (s, 1H), 7.75 (dt,  $J = 8.7, 1.6$  Hz, 1H), 3.72 (d,  $J = 2.3$  Hz, 1H), 3.71 (s, 3H), 3.22 (dd,  $J = 12.0, 4.6$  Hz, 1H), 3.14 (dd,  $J = 16.9, 5.2$  Hz, 1H), 3.08 – 2.92 (m, 1H), 2.87 (d,  $J = 1.4$  Hz, 3H), 2.61 – 2.53 (m, 1H), 2.26 (dd,  $J = 12.9, 4.6$  Hz, 2H), 2.09 – 2.03 (m, 2H), 1.65 (d,  $J = 4.1$  Hz, 1H), 1.53 (s, 3H), 1.18 (s, 3H).

$^{13}\text{C}\{^1\text{H}\}$  NMR (101 MHz,  $\text{CDCl}_3$ ):  $\delta$  178.5, 170.0, 143.8, 138.3, 137.6, 136.8, 135.5, 127.4, 126.4, 125.1, 118.0, 117.0, 116.3, 78.1, 52.6, 51.5, 49.1, 38.7, 38.5, 33.4, 29.2, 27.8, 23.7, 23.6, 21.3.

**IR** (neat)  $\nu_{\text{max}}$  3366, 2838, 1783, 1627, 1353, 1248, 922, 719  $\text{cm}^{-1}$ .

**HRMS** (ESI)  $m/z$ :  $[\text{M} + \text{H}]^+$  calcd. for  $[\text{C}_{52}\text{H}_{56}\text{O}_8\text{N}_2 + \text{H}]^+$  837.4115, found 837.4117.

$[\alpha]_{589}^{25} = +103.4$  ( $c = 0.1$ ,  $\text{CHCl}_3$ ).

### Total synthesis of dioridamycin (1a):

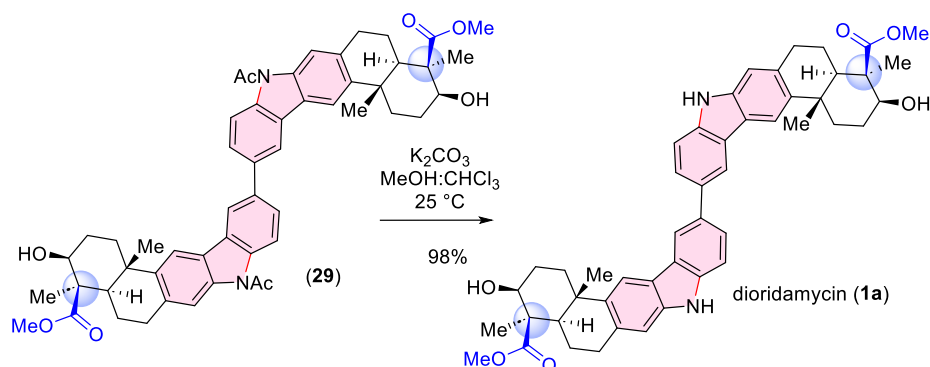

In an oven dried round-bottom flask, (+)-**29** (47 mg, 0.056 mmol, 1.0 equiv.) was taken in a mixture of methanol and chloroform [ $\text{MeOH}:\text{CHCl}_3$  (4:1)] solvent (2 mL). To this solution was added  $\text{K}_2\text{CO}_3$  (16 mg, 0.112 mmol, 4.0 equiv.) at 25 °C and stirring was continued for an additional 2 h. After completion of the reaction (judged by TLC analysis), the reaction mixture was diluted with water (3 mL). Next, it was extracted with dichloromethane (5 mL X 2). The organic layers were dried over  $\text{Na}_2\text{SO}_4$  and concentrated on a rotary evaporator under reduced pressure. Next, the crude methyl ester was purified by flash column chromatography with pure EtOAc in *n*-hexane to afford unnatural dioridamycin (+)-**1a** as a white foam (42 mg, 98% yield).

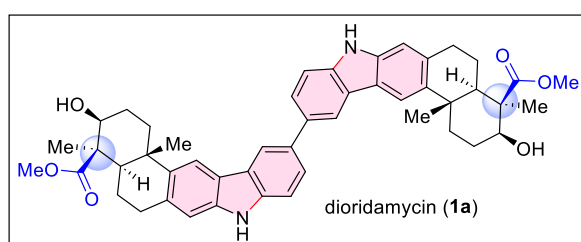

**Dimethyl (3*S*,3'*S*,4*R*,4*aR*,4'*R*,4'*aR*,13*bS*,13'*bS*)-3,3'-dihydroxy-4,4',13*b*,13'*b*-tetramethyl-2,2',3,3',4,4*a*,4',4'*a*,5,5',6,6',8,8',13*b*,13'*b*-hexadecahydro-1*H*,1'*H*-[11,11'-binaphtho[2,1-*b*]carbazole]-4,4'-dicarboxylate [(+)-**1a**]:** (+)-**1a** was obtained as brown foam (0.056 mmol scale of reaction; 42 mg; 98%).  $R_f = 0.4$  (70 % EtOAc in *n*-hexane).

**$^1\text{H NMR}$**  (400 MHz,  $\text{CDCl}_3$ ):  $\delta$  8.33 – 8.26 (m, 1H), 8.04 (s, 1H), 7.86 (s, 1H), 7.71 (dd,  $J = 8.4, 1.8$  Hz, 1H), 7.47 – 7.38 (m, 1H), 7.08 (s, 1H), 3.71 (s, 3H), 3.58 (d,  $J = 11.7$  Hz, 1H), 3.22

(s, 1H), 3.11 (dd,  $J = 16.9, 5.0$  Hz, 1H), 3.08 – 2.95 (m, 1H), 2.60 (d,  $J = 13.2$  Hz, 1H), 2.24 (dd,  $J = 14.8, 7.0$  Hz, 2H), 2.09 – 1.99 (m, 2H), 1.67 (d,  $J = 4.0$  Hz, 1H), 1.53 (s, 3H), 1.18 (s, 3H).

$^{13}\text{C}\{^1\text{H}\}$  NMR (126 MHz,  $\text{CDCl}_3$ ):  $\delta$  178.6, 139.6, 139.1, 138.7, 133.8, 133.8, 125.4, 124.1, 122.5, 118.5, 117.2, 110.6, 109.8, 78.2, 52.9, 51.3, 49.1, 39.1, 38.4, 33.10, 29.3, 23.8, 23.7, 21.4.

**IR** (neat)  $\nu_{\text{max}}$  3436, 2921, 1761, 1658, 1460, 1374, 1287, 967, 884, 752,  $\text{cm}^{-1}$ .

**HRMS** (ESI)  $m/z$ :  $[\text{M} + \text{Na}]^+$  calcd. for  $[\text{C}_{48}\text{H}_{52}\text{O}_6\text{N}_2 + \text{Na}]^+$  775.3723, found 775.3730.

$[\alpha]_{589}^{25} = +107.74$  ( $c = 0.1$ ,  $\text{CH}_3\text{OH}$ ).

## Crystal Data and Structure Refinement of (+)-24

A colorless block  $0.25 \times 0.21 \times 0.15$  mm in size was mounted on a Cryoloop with Paratone oil. Data were collected in a nitrogen gas stream at 293.15 K using omega scans. Crystal-to-detector distance was 43.92 mm and exposure time was 0.50 seconds per frame at low angles and 2.00 seconds at high angles, using a scan width of  $0.5^\circ$ . The  $2\theta$  range for data collection  $^\circ$  6.866 to 139.414. A total of 16632 reflections were collected covering the indices  $-9 \leq h \leq 10$ ,  $-11 \leq k \leq 11$ ,  $-16 \leq l \leq 16$ . 5867 reflections were founded to be symmetry independent, with an  $R_{\text{int}}$  of 0.0630. Indexing and unit cell refinement indicated a primitive, triclinic lattice. The space group was found to be P1/c (No. 14). CrysAlis<sup>Pro</sup> 1.171.41.115a (Rigaku Oxford Diffraction, 2021) Empirical absorption correction using spherical harmonics, implemented in SCALE3 ABSPACK scaling algorithm. Solution by intrinsic phasing (SHELXT-2018/2) produced a heavy-atom phasing model consistent with the proposed structure. All non-hydrogen atoms were refined anisotropically by least-squares (SHELXL-2018/3). All hydrogen atoms were placed using a riding model. Their positions were constrained relative to their parent atom using the appropriate HFIX command in SHELXL-2018/3.

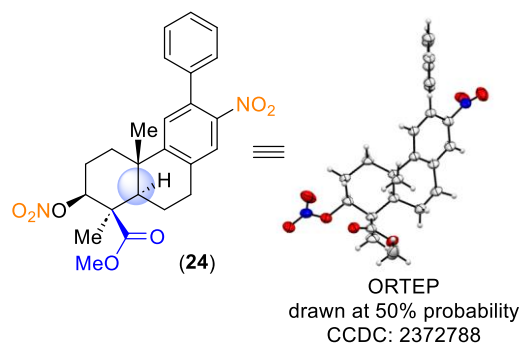

**Figure S1.** Single crystal XRD structure of compound (+)-24. ORTEP drawn at 50% probability level.

| <b>Table 1 Crystal data and structure refinement for sk-no2</b> | sk-no2                                                        |
|-----------------------------------------------------------------|---------------------------------------------------------------|
| Identification code                                             |                                                               |
| Empirical formula                                               | C <sub>24</sub> H <sub>26</sub> N <sub>2</sub> O <sub>7</sub> |
| Formula weight                                                  | 454.47                                                        |
| Temperature/K                                                   | 293                                                           |
| Crystal system                                                  | triclinic                                                     |
| Space group                                                     | P1                                                            |
| a/Å                                                             | 8.9599(5)                                                     |

|                                             |                                         |
|---------------------------------------------|-----------------------------------------|
| b/Å                                         | 9.7829(5)                               |
| c/Å                                         | 13.9325(5)                              |
| $\alpha$ /°                                 | 104.835(4)                              |
| $\beta$ /°                                  | 103.742(4)                              |
| $\gamma$ /°                                 | 99.489(4)                               |
| Volume/Å <sup>3</sup>                       | 1113.12(10)                             |
| Z                                           | 2                                       |
| $\rho$ calcg/cm <sup>3</sup>                | 1.356                                   |
| $\mu$ /mm <sup>-1</sup>                     | 0.835                                   |
| F(000)                                      | 480.0                                   |
| Crystal size/mm <sup>3</sup>                | 0.25 × 0.21 × 0.15                      |
| Radiation                                   | CuK $\alpha$ ( $\lambda$ = 1.54184)     |
| 2 $\theta$ range for data collection/°      | 6.866 to 139.414                        |
| Index ranges                                | -9 ≤ h ≤ 10, -11 ≤ k ≤ 11, -16 ≤ l ≤ 16 |
| Reflections collected                       | 16632                                   |
| Independent reflections                     | 5867 [Rint = 0.0630, Rsigma = 0.0541]   |
| Data/restraints/parameters                  | 5867/3/601                              |
| Goodness-of-fit on F <sup>2</sup>           | 1.110                                   |
| Final R indexes [I ≥ 2 $\sigma$ (I)]        | R1 = 0.0795, wR2 = 0.2111               |
| Final R indexes [all data]                  | R1 = 0.0818, wR2 = 0.2212               |
| Largest diff. peak/hole / e Å <sup>-3</sup> | 0.69/-0.42                              |

**Table S2:** Fractional Atomic Coordinates ( $\times 10^4$ ) and Equivalent Isotropic Displacement Parameters ( $\text{\AA}^2 \times 10^3$ ) for skNO<sub>2</sub>.  $U_{eq}$  is defined as 1/3 of the trace of the orthogonalised  $U_{ij}$  tensor.

| Atom | x         | y         | z        | U(eq)     |
|------|-----------|-----------|----------|-----------|
| O24  | 0 (5)     | 2583 (4)  | 6053 (3) | 39.6 (9)  |
| O64  | 2761 (5)  | 9736 (4)  | 3032 (3) | 42.1 (9)  |
| O57  | 3598 (5)  | 7742 (4)  | 4006 (3) | 40.2 (9)  |
| O31  | -877 (5)  | 410 (4)   | 6908 (3) | 42.6 (9)  |
| O56  | 11243 (5) | 6584 (6)  | -150 (4) | 55.6 (12) |
| O62  | 4849 (5)  | 11539 (4) | 3307 (4) | 47.0 (10) |
| O29  | 249 (5)   | -1384 (4) | 6352 (3) | 43.4 (9)  |
| O27  | 1131 (6)  | 4897 (5)  | 6221 (4) | 56.0 (11) |
| O60  | 2669 (6)  | 6654 (5)  | 4976 (3) | 50.0 (10) |
| N54  | 10327 (6) | 7247 (5)  | -545 (4) | 42.7 (11) |
| N25  | -19 (6)   | 3873 (5)  | 5812 (4) | 43.2 (11) |
| O26  | -1263 (6) | 3809 (5)  | 5195 (3) | 50.7 (10) |
| N58  | 3541 (7)  | 6599 (5)  | 4438 (4) | 46.3 (12) |



**Table S2:** Fractional Atomic Coordinates ( $\times 10^4$ ) and Equivalent Isotropic Displacement Parameters ( $\text{\AA}^2 \times 10^3$ ) for skNO<sub>2</sub>.  $U_{\text{eq}}$  is defined as 1/3 of the trace of the orthogonalised  $U_{\text{H}}$  tensor.

| Atom | x         | y         | z         | U(eq)     |
|------|-----------|-----------|-----------|-----------|
| O23  | 11019 (6) | 3294 (7)  | 10228 (4) | 70.5 (15) |
| O55  | 10391 (6) | 7601 (6)  | -1305 (4) | 61.5 (12) |
| C34  | 8474 (7)  | 8978 (6)  | 1425 (4)  | 39.0 (12) |
| O22  | 10537 (6) | 2857 (7)  | 11572 (4) | 69.6 (15) |
| C47  | 9574 (7)  | 8634 (6)  | 909 (4)   | 40.7 (12) |
| C13  | 7422 (7)  | 3298 (6)  | 10634 (4) | 37.4 (11) |
| C43  | 6890 (6)  | 8208 (6)  | 989 (4)   | 35.7 (11) |
| N21  | 10113 (6) | 2916 (6)  | 10676 (4) | 47.0 (12) |
| C65  | 4500 (7)  | 9133 (6)  | 1030 (4)  | 39.6 (11) |
| C61  | 4173 (6)  | 10160 (6) | 3228 (4)  | 36.8 (11) |
| O59  | 4318 (8)  | 5744 (6)  | 4256 (4)  | 68.9 (16) |
| C5   | 1491 (6)  | 2589 (6)  | 6786 (4)  | 35.8 (11) |
| C42  | 5624 (6)  | 8366 (6)  | 1556 (4)  | 35.0 (11) |
| C46  | 9084 (7)  | 7584 (7)  | -57 (4)   | 39.5 (12) |
| C28  | 213 (7)   | 28 (6)    | 6646 (4)  | 36.2 (11) |
| C35  | 9040 (7)  | 10168 (6) | 2465 (4)  | 41.5 (12) |
| C45  | 7513 (7)  | 6863 (6)  | -565 (4)  | 36.6 (11) |
| C12  | 8399 (7)  | 2576 (6)  | 10151 (4) | 39.0 (11) |
| C3   | 3153 (6)  | 3322 (6)  | 8613 (4)  | 37.3 (11) |
| C14  | 5839 (6)  | 2949 (6)  | 10069 (4) | 35.3 (11) |
| C39  | 4616 (7)  | 7705 (6)  | 3310 (4)  | 38.1 (11) |
| C44  | 6448 (7)  | 7179 (6)  | -14 (4)   | 36.1 (11) |
| C41  | 4736 (6)  | 6825 (6)  | 1491 (4)  | 36.1 (11) |
| C6   | 1637 (7)  | 1010 (6)  | 6534 (4)  | 36.6 (11) |
| C51  | 5942 (8)  | 3855 (7)  | -3650 (4) | 48.0 (14) |
| C40  | 3658 (7)  | 6850 (6)  | 2196 (4)  | 38.2 (11) |
| C52  | 5225 (7)  | 4993 (7)  | -3396 (5) | 45.2 (13) |
| C37  | 6495 (7)  | 9201 (6)  | 2731 (4)  | 36.1 (11) |
| C7   | 3275 (6)  | 1071 (6)  | 7295 (4)  | 35.3 (11) |
| C50  | 7153 (7)  | 3660 (7)  | -2889 (5) | 45.8 (13) |
| C48  | 6979 (7)  | 5792 (6)  | -1621 (4) | 37.2 (12) |
| C36  | 7670 (7)  | 10586 (6) | 2843 (5)  | 42.4 (12) |
| C19  | 9736 (7)  | 6673 (6)  | 12880 (4) | 41.3 (12) |
| C53  | 5734 (7)  | 5954 (7)  | -2387 (4) | 40.3 (12) |
| C38  | 5400 (7)  | 9303 (6)  | 3456 (4)  | 36.3 (11) |
| C4   | 1565 (7)  | 3309 (6)  | 7898 (4)  | 35.7 (11) |
| C16  | 7264 (7)  | 4279 (6)  | 12445 (4) | 39.4 (12) |
| C15  | 7997 (6)  | 4406 (6)  | 11676 (4) | 36.4 (11) |
| C2   | 3484 (6)  | 1792 (6)  | 8467 (4)  | 35.4 (11) |

**Table S2:** Fractional Atomic Coordinates ( $\times 10^4$ ) and Equivalent Isotropic Displacement Parameters ( $\text{\AA}^2 \times 10^3$ ) for skNO2.  $U_{eq}$  is defined as 1/3 of the trace of the orthogonalised  $U_{ij}$  tensor.

| Atom | x         | y         | z         | U(eq)     |
|------|-----------|-----------|-----------|-----------|
| C1   | 5225 (6)  | 1973 (6)  | 9064 (4)  | 36.3 (11) |
| C8   | 3845 (8)  | -343 (7)  | 7134 (5)  | 45.8 (13) |
| C32  | 1680 (7)  | 473 (7)   | 5409 (4)  | 42.8 (13) |
| C49  | 7656 (7)  | 4624 (6)  | -1894 (4) | 39.9 (12) |
| C30  | -1100 (8) | -2389 (6) | 6374 (5)  | 48.6 (14) |
| C17  | 7769 (7)  | 5318 (6)  | 13419 (4) | 41.0 (12) |
| C10  | 6225 (7)  | 1200 (6)  | 8630 (4)  | 40.3 (12) |
| C20  | 9234 (7)  | 5632 (6)  | 11912 (4) | 40.4 (12) |
| C33  | 2436 (7)  | 900 (6)   | 8925 (4)  | 40.2 (12) |
| C11  | 7826 (7)  | 1562 (7)  | 9184 (5)  | 43.3 (13) |
| C18  | 9001 (7)  | 6507 (7)  | 13641 (4) | 44.5 (13) |
| C66  | 6404 (7)  | 10011 (7) | 4600 (4)  | 45.7 (13) |
| C9   | 5643 (7)  | 62 (6)    | 7573 (5)  | 43.5 (13) |
| C63  | 3739 (9)  | 12411 (7) | 3074 (8)  | 62.0 (19) |

**Table 3:** Anisotropic Displacement Parameters ( $\text{\AA}^2 \times 10^3$ ) for skNO2. The Anisotropic displacement factor exponent takes the form:  $-2\pi^2[h^2a^*U_{11}+2hka^*b^*U_{12}+\dots]$ .

| Atom | U <sub>11</sub> | U <sub>22</sub> | U <sub>33</sub> | U <sub>23</sub> | U <sub>13</sub> | U <sub>12</sub> |
|------|-----------------|-----------------|-----------------|-----------------|-----------------|-----------------|
| O24  | 41 (2)          | 40.1 (19)       | 23.2 (17)       | 1.2 (14)        | -3.1 (15)       | 0.8 (16)        |
| O64  | 39 (2)          | 44 (2)          | 34.2 (19)       | 3.9 (16)        | 7.7 (16)        | 1.3 (17)        |
| O57  | 47 (2)          | 41 (2)          | 28.5 (18)       | 7.0 (15)        | 10.1 (16)       | 6.0 (17)        |
| O31  | 37 (2)          | 42 (2)          | 34.9 (19)       | -0.9 (16)       | 3.6 (16)        | 1.6 (16)        |
| O56  | 41 (2)          | 73 (3)          | 38 (2)          | -2 (2)          | 6.8 (19)        | 13 (2)          |
| O62  | 40 (2)          | 35 (2)          | 53 (2)          | 0.6 (18)        | 9.2 (19)        | 2.2 (16)        |
| O29  | 51 (2)          | 31.7 (19)       | 34.9 (19)       | -1.5 (15)       | 6.2 (17)        | 4.0 (16)        |
| O27  | 52 (3)          | 48 (2)          | 60 (3)          | 18 (2)          | 8 (2)           | 1 (2)           |
| O60  | 59 (3)          | 53 (2)          | 31.4 (19)       | 6.6 (17)        | 15.7 (19)       | 2 (2)           |
| N54  | 36 (2)          | 47 (3)          | 31 (2)          | -0.9 (19)       | 7.2 (19)        | -4 (2)          |
| N25  | 46 (3)          | 46 (3)          | 34 (2)          | 10 (2)          | 8 (2)           | 9 (2)           |
| O26  | 55 (3)          | 55 (2)          | 32 (2)          | 9.8 (18)        | -1.1 (19)       | 12 (2)          |
| N58  | 62 (3)          | 39 (2)          | 30 (2)          | 1.7 (19)        | 13 (2)          | 6 (2)           |
| O23  | 41 (3)          | 103 (4)         | 43 (3)          | -5 (3)          | 12 (2)          | -5 (3)          |
| O55  | 62 (3)          | 79 (3)          | 41 (2)          | 17 (2)          | 20 (2)          | 2 (2)           |
| C34  | 38 (3)          | 41 (3)          | 25 (2)          | 2 (2)           | 2 (2)           | -1 (2)          |

**Table 3:** Anisotropic Displacement Parameters ( $\text{\AA}^2 \times 10^3$ ) for skNO2. The Anisotropic displacement factor exponent takes the form:  $-2\pi^2[h^2a^2U_{11}+2hka^*b^*U_{12}+\dots]$ .

| Atom | U <sub>11</sub> | U <sub>22</sub> | U <sub>33</sub> | U <sub>23</sub> | U <sub>13</sub> | U <sub>12</sub> |
|------|-----------------|-----------------|-----------------|-----------------|-----------------|-----------------|
| O22  | 52 (3)          | 93 (4)          | 55 (3)          | 31 (3)          | -3 (2)          | 9 (3)           |
| C47  | 34 (3)          | 48 (3)          | 26 (2)          | 1 (2)           | 2 (2)           | -4 (2)          |
| C13  | 37 (3)          | 40 (3)          | 27 (2)          | 5 (2)           | 5 (2)           | 4 (2)           |
| C43  | 35 (3)          | 37 (3)          | 26 (2)          | 2 (2)           | 5 (2)           | 1 (2)           |
| N21  | 38 (3)          | 50 (3)          | 40 (3)          | 2 (2)           | 4 (2)           | 4 (2)           |
| C65  | 38 (3)          | 39 (3)          | 29 (3)          | 0 (2)           | 3 (2)           | 1 (2)           |
| C61  | 35 (3)          | 41 (3)          | 25 (2)          | 1 (2)           | 7 (2)           | 2 (2)           |
| O59  | 115 (5)         | 62 (3)          | 59 (3)          | 29 (2)          | 50 (3)          | 48 (3)          |
| C5   | 33 (3)          | 42 (3)          | 22 (2)          | 3 (2)           | 1 (2)           | 3 (2)           |
| C42  | 34 (3)          | 38 (3)          | 23 (2)          | 0.7 (19)        | 4 (2)           | -1 (2)          |
| C46  | 38 (3)          | 46 (3)          | 26 (2)          | 4 (2)           | 7 (2)           | 1 (2)           |
| C28  | 40 (3)          | 37 (3)          | 17 (2)          | -2.7 (18)       | -1.6 (19)       | 2 (2)           |
| C35  | 37 (3)          | 42 (3)          | 28 (3)          | -1 (2)          | 1 (2)           | -6 (2)          |
| C45  | 37 (3)          | 37 (3)          | 25 (3)          | 2 (2)           | 6 (2)           | 0 (2)           |
| C12  | 33 (3)          | 42 (3)          | 33 (3)          | 7 (2)           | 1 (2)           | 3 (2)           |
| C3   | 35 (3)          | 39 (3)          | 24 (2)          | -2.3 (19)       | 3 (2)           | 1 (2)           |
| C14  | 34 (3)          | 36 (3)          | 28 (3)          | 3 (2)           | 6 (2)           | 4 (2)           |
| C39  | 37 (3)          | 46 (3)          | 24 (2)          | 3 (2)           | 7 (2)           | 4 (2)           |
| C44  | 35 (3)          | 36 (3)          | 27 (2)          | 3 (2)           | 4 (2)           | 0 (2)           |
| C41  | 35 (3)          | 38 (3)          | 23 (2)          | -1.8 (19)       | 3 (2)           | 4 (2)           |
| C6   | 38 (3)          | 41 (3)          | 18 (2)          | -2.0 (19)       | 2 (2)           | 1 (2)           |
| C51  | 47 (3)          | 53 (3)          | 27 (3)          | -4 (2)          | 8 (2)           | -2 (3)          |
| C40  | 39 (3)          | 36 (3)          | 26 (3)          | -2 (2)          | 6 (2)           | -3 (2)          |
| C52  | 43 (3)          | 55 (3)          | 27 (3)          | 8 (2)           | 5 (2)           | 0 (3)           |
| C37  | 33 (3)          | 40 (3)          | 22 (2)          | 0 (2)           | 2 (2)           | 0 (2)           |
| C7   | 35 (3)          | 38 (3)          | 21 (2)          | -0.4 (19)       | 2 (2)           | 2 (2)           |
| C50  | 42 (3)          | 47 (3)          | 36 (3)          | -1 (2)          | 10 (2)          | 1 (2)           |
| C48  | 36 (3)          | 43 (3)          | 24 (3)          | 3 (2)           | 7 (2)           | 0 (2)           |
| C36  | 37 (3)          | 40 (3)          | 35 (3)          | -3 (2)          | 6 (2)           | -2 (2)          |
| C19  | 34 (3)          | 43 (3)          | 35 (3)          | 6 (2)           | 2 (2)           | -1 (2)          |
| C53  | 37 (3)          | 46 (3)          | 29 (3)          | 5 (2)           | 5 (2)           | 2 (2)           |
| C38  | 36 (3)          | 37 (3)          | 23 (2)          | -2.2 (19)       | 2 (2)           | 1 (2)           |
| C4   | 39 (3)          | 33 (2)          | 22 (2)          | -1.5 (19)       | 0 (2)           | 3 (2)           |
| C16  | 38 (3)          | 40 (3)          | 30 (3)          | 5 (2)           | 3 (2)           | 0 (2)           |
| C15  | 32 (3)          | 42 (3)          | 26 (2)          | 6 (2)           | 0 (2)           | 2 (2)           |
| C2   | 34 (3)          | 37 (3)          | 20 (2)          | -4.1 (19)       | 0.6 (19)        | 1 (2)           |
| C1   | 34 (3)          | 36 (3)          | 29 (3)          | 2 (2)           | 4 (2)           | 2 (2)           |
| C8   | 46 (3)          | 41 (3)          | 33 (3)          | -6 (2)          | 6 (2)           | 1 (2)           |
| C32  | 43 (3)          | 50 (3)          | 21 (2)          | -2 (2)          | 4 (2)           | 4 (2)           |
| C49  | 41 (3)          | 41 (3)          | 29 (3)          | 6 (2)           | 7 (2)           | 3 (2)           |

**Table 3:** Anisotropic Displacement Parameters ( $\text{\AA}^2 \times 10^3$ ) for skNO<sub>2</sub>. The Anisotropic displacement factor exponent takes the form:  $-2\pi^2[h^2a^*2U_{11}+2hka^*b^*U_{12}+\dots]$ .

| Atom | U <sub>11</sub> | U <sub>22</sub> | U <sub>33</sub> | U <sub>23</sub> | U <sub>13</sub> | U <sub>12</sub> |
|------|-----------------|-----------------|-----------------|-----------------|-----------------|-----------------|
| C30  | 57 (4)          | 36 (3)          | 40 (3)          | 5 (2)           | 4 (3)           | 1 (3)           |
| C17  | 40 (3)          | 47 (3)          | 31 (3)          | 8 (2)           | 8 (2)           | 9 (2)           |
| C10  | 39 (3)          | 40 (3)          | 30 (3)          | 1 (2)           | 4 (2)           | 3 (2)           |
| C20  | 37 (3)          | 43 (3)          | 31 (3)          | 8 (2)           | 3 (2)           | 0 (2)           |
| C33  | 39 (3)          | 43 (3)          | 25 (2)          | 1 (2)           | 0 (2)           | 0 (2)           |
| C11  | 40 (3)          | 46 (3)          | 34 (3)          | 2 (2)           | 8 (2)           | 6 (2)           |
| C18  | 45 (3)          | 44 (3)          | 28 (3)          | 0 (2)           | -1 (2)          | 1 (2)           |
| C66  | 45 (3)          | 52 (3)          | 21 (2)          | -5 (2)          | 0 (2)           | 1 (3)           |
| C9   | 42 (3)          | 39 (3)          | 36 (3)          | -3 (2)          | 4 (2)           | 10 (2)          |
| C63  | 57 (4)          | 41 (3)          | 95 (6)          | 24 (4)          | 31 (4)          | 14 (3)          |

**Table 4:** Bond Lengths for skNO<sub>2</sub>.

| Atom | Atom | Length/\AA | Atom | Atom | Length/\AA |
|------|------|------------|------|------|------------|
| O24  | N25  | 1.388 (6)  | C28  | C6   | 1.531 (8)  |
| O24  | C5   | 1.474 (6)  | C35  | C36  | 1.521 (9)  |
| O64  | C61  | 1.204 (7)  | C45  | C44  | 1.385 (8)  |
| O57  | N58  | 1.398 (6)  | C45  | C48  | 1.485 (7)  |
| O57  | C39  | 1.479 (7)  | C12  | C11  | 1.371 (8)  |
| O31  | C28  | 1.203 (7)  | C3   | C4   | 1.527 (7)  |
| O56  | N54  | 1.240 (7)  | C3   | C2   | 1.545 (7)  |
| O62  | C61  | 1.350 (7)  | C14  | C1   | 1.397 (7)  |
| O62  | C63  | 1.446 (8)  | C39  | C40  | 1.520 (7)  |
| O29  | C28  | 1.345 (7)  | C39  | C38  | 1.544 (8)  |
| O29  | C30  | 1.439 (8)  | C41  | C40  | 1.531 (8)  |
| O27  | N25  | 1.216 (7)  | C6   | C7   | 1.575 (7)  |
| O60  | N58  | 1.203 (7)  | C6   | C32  | 1.532 (7)  |
| N54  | O55  | 1.207 (7)  | C51  | C52  | 1.385 (10) |
| N54  | C46  | 1.476 (8)  | C51  | C50  | 1.401 (9)  |
| N25  | O26  | 1.216 (7)  | C52  | C53  | 1.396 (8)  |
| N58  | O59  | 1.190 (7)  | C37  | C36  | 1.521 (8)  |
| O23  | N21  | 1.203 (7)  | C37  | C38  | 1.564 (8)  |
| C34  | C47  | 1.386 (8)  | C7   | C2   | 1.556 (6)  |
| C34  | C43  | 1.398 (8)  | C7   | C8   | 1.534 (8)  |
| C34  | C35  | 1.518 (7)  | C50  | C49  | 1.382 (8)  |
| O22  | N21  | 1.234 (8)  | C48  | C53  | 1.409 (8)  |
| C47  | C46  | 1.387 (8)  | C48  | C49  | 1.390 (8)  |
| C13  | C12  | 1.400 (8)  | C19  | C20  | 1.384 (8)  |

| Atom | Atom | Length/Å  | Atom | Atom | Length/Å  |
|------|------|-----------|------|------|-----------|
| C13  | C14  | 1.386 (8) | C19  | C18  | 1.402 (9) |
| C13  | C15  | 1.484 (7) | C38  | C66  | 1.542 (7) |
| C43  | C42  | 1.535 (8) | C16  | C15  | 1.404 (8) |
| C43  | C44  | 1.417 (7) | C16  | C17  | 1.388 (8) |
| N21  | C12  | 1.475 (7) | C15  | C20  | 1.401 (8) |
| C65  | C42  | 1.515 (8) | C2   | C1   | 1.541 (7) |
| C61  | C38  | 1.512 (8) | C2   | C33  | 1.533 (8) |
| C5   | C6   | 1.529 (7) | C1   | C10  | 1.409 (8) |
| C5   | C4   | 1.510 (7) | C8   | C9   | 1.524 (9) |
| C42  | C41  | 1.554 (8) | C17  | C18  | 1.378 (9) |
| C42  | C37  | 1.566 (6) | C10  | C11  | 1.395 (8) |
| C46  | C45  | 1.387 (8) | C10  | C9   | 1.511 (7) |

| Atom | Atom | Atom | Angle/°   | Atom | Atom | Atom | Angle/°   |
|------|------|------|-----------|------|------|------|-----------|
| N25  | O24  | C5   | 114.7 (4) | C40  | C39  | C38  | 113.7 (4) |
| N58  | O57  | C39  | 113.8 (4) | C45  | C44  | C43  | 123.4 (5) |
| C61  | O62  | C63  | 114.5 (5) | C40  | C41  | C42  | 113.6 (4) |
| C28  | O29  | C30  | 115.3 (5) | C5   | C6   | C28  | 110.6 (4) |
| O56  | N54  | C46  | 117.3 (5) | C5   | C6   | C7   | 104.8 (4) |
| O55  | N54  | O56  | 123.5 (5) | C5   | C6   | C32  | 109.2 (4) |
| O55  | N54  | C46  | 119.2 (5) | C28  | C6   | C7   | 114.4 (4) |
| O27  | N25  | O24  | 119.5 (5) | C28  | C6   | C32  | 108.3 (4) |
| O26  | N25  | O24  | 112.3 (5) | C32  | C6   | C7   | 109.5 (4) |
| O26  | N25  | O27  | 128.2 (5) | C52  | C51  | C50  | 119.9 (5) |
| O60  | N58  | O57  | 111.4 (5) | C39  | C40  | C41  | 109.6 (5) |
| O59  | N58  | O57  | 119.6 (5) | C51  | C52  | C53  | 119.7 (5) |
| O59  | N58  | O60  | 129.0 (6) | C36  | C37  | C42  | 110.4 (4) |
| C47  | C34  | C43  | 119.6 (5) | C36  | C37  | C38  | 117.8 (4) |
| C47  | C34  | C35  | 118.6 (5) | C38  | C37  | C42  | 114.9 (4) |
| C43  | C34  | C35  | 121.8 (5) | C2   | C7   | C6   | 115.2 (4) |
| C34  | C47  | C46  | 119.9 (5) | C8   | C7   | C6   | 116.8 (5) |
| C12  | C13  | C15  | 123.9 (5) | C8   | C7   | C2   | 110.4 (4) |
| C14  | C13  | C12  | 116.0 (5) | C49  | C50  | C51  | 119.9 (6) |
| C14  | C13  | C15  | 120.1 (5) | C53  | C48  | C45  | 119.2 (5) |
| C34  | C43  | C42  | 123.6 (5) | C49  | C48  | C45  | 122.8 (5) |
| C34  | C43  | C44  | 118.0 (5) | C49  | C48  | C53  | 118.1 (5) |
| C44  | C43  | C42  | 118.3 (5) | C37  | C36  | C35  | 108.6 (5) |

| Atom | Atom | Atom | Angle/°   | Atom | Atom | Atom | Angle/°   |
|------|------|------|-----------|------|------|------|-----------|
| O23  | N21  | O22  | 123.5 (6) | C20  | C19  | C18  | 119.9 (5) |
| O23  | N21  | C12  | 118.4 (5) | C52  | C53  | C48  | 120.9 (5) |
| O22  | N21  | C12  | 118.0 (5) | C61  | C38  | C39  | 111.3 (4) |
| O64  | C61  | O62  | 121.7 (5) | C61  | C38  | C37  | 114.4 (4) |
| O64  | C61  | C38  | 126.7 (5) | C61  | C38  | C66  | 107.9 (4) |
| O62  | C61  | C38  | 111.6 (5) | C39  | C38  | C37  | 104.8 (4) |
| O24  | C5   | C6   | 106.3 (4) | C66  | C38  | C39  | 108.2 (5) |
| O24  | C5   | C4   | 111.8 (4) | C66  | C38  | C37  | 110.1 (5) |
| C4   | C5   | C6   | 115.4 (4) | C5   | C4   | C3   | 109.2 (4) |
| C43  | C42  | C41  | 108.8 (4) | C17  | C16  | C15  | 121.2 (5) |
| C43  | C42  | C37  | 107.7 (4) | C16  | C15  | C13  | 120.4 (5) |
| C65  | C42  | C43  | 107.9 (4) | C20  | C15  | C13  | 121.6 (5) |
| C65  | C42  | C41  | 110.9 (4) | C20  | C15  | C16  | 117.9 (5) |
| C65  | C42  | C37  | 114.1 (4) | C3   | C2   | C7   | 108.6 (4) |
| C41  | C42  | C37  | 107.3 (4) | C1   | C2   | C3   | 108.3 (4) |
| C47  | C46  | N54  | 116.8 (5) | C1   | C2   | C7   | 107.5 (4) |
| C47  | C46  | C45  | 123.2 (5) | C33  | C2   | C3   | 110.2 (5) |
| C45  | C46  | N54  | 120.0 (5) | C33  | C2   | C7   | 114.1 (4) |
| O31  | C28  | O29  | 121.8 (5) | C33  | C2   | C1   | 108.0 (4) |
| O31  | C28  | C6   | 126.3 (5) | C14  | C1   | C2   | 118.7 (5) |
| O29  | C28  | C6   | 111.8 (5) | C14  | C1   | C10  | 118.8 (5) |
| C34  | C35  | C36  | 112.1 (5) | C10  | C1   | C2   | 122.4 (5) |
| C46  | C45  | C48  | 123.2 (5) | C9   | C8   | C7   | 108.0 (5) |
| C44  | C45  | C46  | 115.7 (5) | C50  | C49  | C48  | 121.5 (5) |
| C44  | C45  | C48  | 121.1 (5) | C18  | C17  | C16  | 120.0 (5) |
| C13  | C12  | N21  | 119.9 (5) | C1   | C10  | C9   | 122.5 (5) |
| C11  | C12  | C13  | 122.3 (5) | C11  | C10  | C1   | 118.0 (5) |
| C11  | C12  | N21  | 117.8 (5) | C11  | C10  | C9   | 119.4 (5) |
| C4   | C3   | C2   | 113.2 (4) | C19  | C20  | C15  | 121.0 (5) |
| C13  | C14  | C1   | 123.4 (5) | C12  | C11  | C10  | 121.2 (5) |
| O57  | C39  | C40  | 110.6 (4) | C17  | C18  | C19  | 120.0 (5) |
| O57  | C39  | C38  | 106.9 (4) | C10  | C9   | C8   | 112.7 (5) |

| A   | B  | C  | D   | Angle/°   | A   | B   | C   | D   | Angle/°    |
|-----|----|----|-----|-----------|-----|-----|-----|-----|------------|
| O24 | C5 | C6 | C28 | -58.9 (5) | C12 | C13 | C14 | C1  | -1.9 (8)   |
| O24 | C5 | C6 | C7  | 177.5 (4) | C12 | C13 | C15 | C16 | -128.1 (6) |
| O24 | C5 | C6 | C32 | 60.2 (6)  | C12 | C13 | C15 | C20 | 54.5 (8)   |

**Table 6:** Torsion Angles for skNO2.

| A   | B   | C   | D   | Angle/°    | A   | B   | C   | D   | Angle/°    |
|-----|-----|-----|-----|------------|-----|-----|-----|-----|------------|
| O24 | C5  | C4  | C3  | -178.2 (4) | C3  | C2  | C1  | C14 | 44.8 (7)   |
| O64 | C61 | C38 | C39 | 5.3 (7)    | C3  | C2  | C1  | C10 | -134.7 (5) |
| O64 | C61 | C38 | C37 | 123.9 (6)  | C14 | C13 | C12 | N21 | 177.8 (5)  |
| O64 | C61 | C38 | C66 | -113.2 (6) | C14 | C13 | C12 | C11 | -1.2 (8)   |
| O57 | C39 | C40 | C41 | -180.0 (4) | C14 | C13 | C15 | C16 | 53.4 (7)   |
| O57 | C39 | C38 | C61 | -57.4 (5)  | C14 | C13 | C15 | C20 | -124.0 (6) |
| O57 | C39 | C38 | C37 | 178.4 (4)  | C14 | C1  | C10 | C11 | -6.7 (8)   |
| O57 | C39 | C38 | C66 | 60.9 (5)   | C14 | C1  | C10 | C9  | 176.5 (5)  |
| O31 | C28 | C6  | C5  | -1.0 (7)   | C39 | O57 | N58 | O60 | -178.2 (4) |
| O31 | C28 | C6  | C7  | 117.0 (6)  | C39 | O57 | N58 | O59 | 2.5 (8)    |
| O31 | C28 | C6  | C32 | -120.6 (6) | C44 | C43 | C42 | C65 | -72.6 (6)  |
| O56 | N54 | C46 | C47 | 70.5 (7)   | C44 | C43 | C42 | C41 | 47.8 (6)   |
| O56 | N54 | C46 | C45 | -109.6 (6) | C44 | C43 | C42 | C37 | 163.9 (5)  |
| O62 | C61 | C38 | C39 | -177.1 (4) | C44 | C45 | C48 | C53 | 52.8 (7)   |
| O62 | C61 | C38 | C37 | -58.6 (6)  | C44 | C45 | C48 | C49 | -127.2 (6) |
| O62 | C61 | C38 | C66 | 64.3 (6)   | C41 | C42 | C37 | C36 | 167.8 (4)  |
| O29 | C28 | C6  | C5  | 175.2 (4)  | C41 | C42 | C37 | C38 | -56.1 (6)  |
| O29 | C28 | C6  | C7  | -66.9 (5)  | C6  | C5  | C4  | C3  | 60.2 (6)   |
| O29 | C28 | C6  | C32 | 55.5 (6)   | C6  | C7  | C2  | C3  | -54.1 (6)  |
| N54 | C46 | C45 | C44 | 175.6 (5)  | C6  | C7  | C2  | C1  | -171.1 (4) |
| N54 | C46 | C45 | C48 | -3.1 (8)   | C6  | C7  | C2  | C33 | 69.1 (6)   |
| N25 | O24 | C5  | C6  | -151.5 (4) | C6  | C7  | C8  | C9  | 155.5 (5)  |
| N25 | O24 | C5  | C4  | 81.8 (5)   | C51 | C52 | C53 | C48 | 0.5 (9)    |
| N58 | O57 | C39 | C40 | 90.9 (5)   | C51 | C50 | C49 | C48 | 0.4 (9)    |
| N58 | O57 | C39 | C38 | -144.8 (4) | C40 | C39 | C38 | C61 | 64.9 (6)   |
| O23 | N21 | C12 | C13 | -124.3 (6) | C40 | C39 | C38 | C37 | -59.3 (6)  |
| O23 | N21 | C12 | C11 | 54.8 (8)   | C40 | C39 | C38 | C66 | -176.8 (5) |
| O55 | N54 | C46 | C47 | -110.7 (6) | C52 | C51 | C50 | C49 | -1.6 (10)  |
| O55 | N54 | C46 | C45 | 69.3 (7)   | C37 | C42 | C41 | C40 | 53.0 (6)   |
| C34 | C47 | C46 | N54 | -178.3 (5) | C7  | C2  | C1  | C14 | 162.0 (5)  |
| C34 | C47 | C46 | C45 | 1.7 (9)    | C7  | C2  | C1  | C10 | -17.5 (7)  |
| C34 | C43 | C42 | C65 | 110.3 (6)  | C7  | C8  | C9  | C10 | 45.7 (7)   |
| C34 | C43 | C42 | C41 | -129.3 (5) | C50 | C51 | C52 | C53 | 1.1 (9)    |
| C34 | C43 | C42 | C37 | -13.3 (7)  | C48 | C45 | C44 | C43 | -178.9 (5) |
| C34 | C43 | C44 | C45 | 2.4 (8)    | C36 | C37 | C38 | C61 | 68.8 (6)   |
| C34 | C35 | C36 | C37 | 47.5 (6)   | C36 | C37 | C38 | C39 | -169.0 (5) |
| O22 | N21 | C12 | C13 | 52.7 (8)   | C36 | C37 | C38 | C66 | -52.8 (7)  |
| O22 | N21 | C12 | C11 | -128.3 (7) | C53 | C48 | C49 | C50 | 1.2 (9)    |
| C47 | C34 | C43 | C42 | 171.9 (5)  | C38 | C39 | C40 | C41 | 59.8 (6)   |
| C47 | C34 | C43 | C44 | -5.2 (8)   | C38 | C37 | C36 | C35 | 155.1 (5)  |
| C47 | C34 | C35 | C36 | 170.6 (5)  | C4  | C5  | C6  | C28 | 65.6 (6)   |

| <b>Table 6:</b> Torsion Angles for skNO2. |          |          |          |                |          |          |          |          |                |  |
|-------------------------------------------|----------|----------|----------|----------------|----------|----------|----------|----------|----------------|--|
| <b>A</b>                                  | <b>B</b> | <b>C</b> | <b>D</b> | <b>Angle/°</b> | <b>A</b> | <b>B</b> | <b>C</b> | <b>D</b> | <b>Angle/°</b> |  |
| C47                                       | C46      | C45      | C44      | -4.4 (8)       | C4       | C5       | C6       | C7       | -58.0 (6)      |  |
| C47                                       | C46      | C45      | C48      | 176.9 (5)      | C4       | C5       | C6       | C32      | -175.3 (5)     |  |
| C13                                       | C12      | C11      | C10      | 0.1 (9)        | C4       | C3       | C2       | C7       | 52.8 (6)       |  |
| C13                                       | C14      | C1       | C2       | -173.6 (5)     | C4       | C3       | C2       | C1       | 169.2 (4)      |  |
| C13                                       | C14      | C1       | C10      | 5.9 (8)        | C4       | C3       | C2       | C33      | -72.8 (6)      |  |
| C13                                       | C15      | C20      | C19      | 178.6 (5)      | C16      | C15      | C20      | C19      | 1.1 (8)        |  |
| C43                                       | C34      | C47      | C46      | 3.3 (9)        | C16      | C17      | C18      | C19      | 0.5 (9)        |  |
| C43                                       | C34      | C35      | C36      | -10.7 (8)      | C15      | C13      | C12      | N21      | -0.7 (8)       |  |
| C43                                       | C42      | C41      | C40      | 169.3 (4)      | C15      | C13      | C12      | C11      | -179.7 (6)     |  |
| C43                                       | C42      | C37      | C36      | 50.8 (6)       | C15      | C13      | C14      | C1       | 176.7 (5)      |  |
| C43                                       | C42      | C37      | C38      | -173.1 (4)     | C15      | C16      | C17      | C18      | 0.7 (8)        |  |
| N21                                       | C12      | C11      | C10      | -178.9 (6)     | C2       | C3       | C4       | C5       | -55.5 (6)      |  |
| C65                                       | C42      | C41      | C40      | -72.2 (6)      | C2       | C7       | C8       | C9       | -70.5 (6)      |  |
| C65                                       | C42      | C37      | C36      | -68.9 (6)      | C2       | C1       | C10      | C11      | 172.8 (5)      |  |
| C65                                       | C42      | C37      | C38      | 67.1 (6)       | C2       | C1       | C10      | C9       | -4.0 (9)       |  |
| C5                                        | O24      | N25      | O27      | -1.7 (7)       | C1       | C10      | C11      | C12      | 3.9 (9)        |  |
| C5                                        | O24      | N25      | O26      | 179.0 (4)      | C1       | C10      | C9       | C8       | -10.6 (8)      |  |
| C5                                        | C6       | C7       | C2       | 55.1 (6)       | C8       | C7       | C2       | C3       | 171.0 (5)      |  |
| C5                                        | C6       | C7       | C8       | -173.0 (5)     | C8       | C7       | C2       | C1       | 54.0 (6)       |  |
| C42                                       | C43      | C44      | C45      | -174.9 (5)     | C8       | C7       | C2       | C33      | -65.7 (6)      |  |
| C42                                       | C41      | C40      | C39      | -55.7 (6)      | C32      | C6       | C7       | C2       | 172.2 (5)      |  |
| C42                                       | C37      | C36      | C35      | -70.3 (6)      | C32      | C6       | C7       | C8       | -55.9 (7)      |  |
| C42                                       | C37      | C38      | C61      | -63.8 (6)      | C49      | C48      | C53      | C52      | -1.7 (8)       |  |
| C42                                       | C37      | C38      | C39      | 58.3 (6)       | C30      | O29      | C28      | O31      | 0.0 (7)        |  |
| C42                                       | C37      | C38      | C66      | 174.5 (5)      | C30      | O29      | C28      | C6       | -176.4 (4)     |  |
| C46                                       | C45      | C44      | C43      | 2.3 (8)        | C17      | C16      | C15      | C13      | -179.0 (5)     |  |
| C46                                       | C45      | C48      | C53      | -128.6 (6)     | C17      | C16      | C15      | C20      | -1.4 (8)       |  |
| C46                                       | C45      | C48      | C49      | 51.4 (8)       | C20      | C19      | C18      | C17      | -0.8 (9)       |  |
| C28                                       | C6       | C7       | C2       | -66.1 (6)      | C33      | C2       | C1       | C14      | -74.5 (6)      |  |
| C28                                       | C6       | C7       | C8       | 65.8 (6)       | C33      | C2       | C1       | C10      | 106.0 (6)      |  |
| C35                                       | C34      | C47      | C46      | -178.0 (5)     | C11      | C10      | C9       | C8       | 172.7 (6)      |  |
| C35                                       | C34      | C43      | C42      | -6.8 (8)       | C18      | C19      | C20      | C15      | 0.0 (8)        |  |
| C35                                       | C34      | C43      | C44      | 176.1 (5)      | C9       | C10      | C11      | C12      | -179.2 (6)     |  |
| C45                                       | C48      | C53      | C52      | 178.3 (5)      | C63      | O62      | C61      | O64      | -3.8 (8)       |  |
| C45                                       | C48      | C49      | C50      | -178.8 (5)     | C63      | O62      | C61      | C38      | 178.6 (6)      |  |



**Table 7:** Hydrogen Atom Coordinates ( $\text{\AA}\times 10^4$ ) and Isotropic Displacement Parameters ( $\text{\AA}^2\times 10^3$ ) for skNO<sub>2</sub>.

| Atom | x        | y        | z        | U(eq) |
|------|----------|----------|----------|-------|
| H47  | 10638.32 | 9106.66  | 1210.86  | 49    |
| H65A | 5057.78  | 10105.69 | 1122.4   | 59    |
| H65B | 3644.59  | 9170.3   | 1332.51  | 59    |
| H65C | 4086.55  | 8609.14  | 302.05   | 59    |
| H5   | 2362.51  | 3155.99  | 6632.87  | 43    |
| H35A | 9683.3   | 11021.69 | 2400.63  | 50    |
| H35B | 9698.31  | 9836.27  | 2974.75  | 50    |
| H3A  | 3173.12  | 3736.32  | 9328.53  | 45    |
| H3B  | 3992.19  | 3945.43  | 8482.35  | 45    |
| H14  | 5149.21  | 3386.26  | 10374.39 | 42    |
| H39  | 5447.45  | 7219.47  | 3533.14  | 46    |
| H44  | 5388.31  | 6690.88  | -317.83  | 43    |
| H41A | 4101.63  | 6320.05  | 778.13   | 43    |
| H41B | 5507.54  | 6277.94  | 1678.19  | 43    |
| H51  | 5620.22  | 3221.24  | -4324.84 | 58    |
| H40A | 2808.17  | 7298.3   | 1967.34  | 46    |
| H40B | 3192.17  | 5861.29  | 2156.31  | 46    |
| H52  | 4408.14  | 5115.17  | -3896.58 | 54    |
| H37  | 7164.61  | 8573.92  | 2951.28  | 43    |
| H7   | 4048.68  | 1736.38  | 7129.69  | 42    |
| H50  | 7618.17  | 2882.24  | -3053.87 | 55    |
| H36A | 8057.49  | 11187.27 | 3564.35  | 51    |
| H36B | 7156.91  | 11138.5  | 2435.16  | 51    |
| H19  | 10558.86 | 7481.48  | 13026.47 | 50    |
| H53  | 5244.48  | 6712.46  | -2216.44 | 48    |
| H4A  | 707.82   | 2778.93  | 8073.36  | 43    |
| H4B  | 1450.5   | 4298.7   | 7986.66  | 43    |
| H16  | 6423.8   | 3485.42  | 12300.2  | 47    |
| H8A  | 3377.9   | -951.29  | 7489.05  | 55    |
| H8B  | 3533.37  | -881.35  | 6400     | 55    |
| H32A | 722.29   | 528.6    | 4949.04  | 64    |
| H32B | 1773.14  | -517.67  | 5248.12  | 64    |
| H32C | 2571.65  | 1073.36  | 5324.59  | 64    |
| H49  | 8465.32  | 4489.53  | -1395.56 | 48    |
| H30A | -2041.91 | -2307.69 | 5913.62  | 73    |
| H30B | -1187.22 | -2165.57 | 7067.96  | 73    |
| H30C | -970.48  | -3364.91 | 6156.04  | 73    |
| H17  | 7275.64  | 5210.56  | 13921.26 | 49    |
| H20  | 9726.15  | 5748.75  | 11411.01 | 48    |
| H33A | 2679.47  | 1374.65  | 9656.88  | 60    |

**Table 7:** Hydrogen Atom Coordinates ( $\text{\AA}\times 10^4$ ) and Isotropic Displacement Parameters ( $\text{\AA}^2\times 10^3$ ) for skNO<sub>2</sub>.

| Atom | x       | y        | z        | U(eq) |
|------|---------|----------|----------|-------|
| H33B | 2629.46 | -56.54   | 8812.3   | 60    |
| H33C | 1342.96 | 823.26   | 8592.57  | 60    |
| H11  | 8518.03 | 1106.55  | 8893.19  | 52    |
| H18  | 9344.54 | 7199.65  | 14294.24 | 53    |
| H66A | 6885.74 | 11011.91 | 4709.96  | 69    |
| H66B | 7213.97 | 9502.07  | 4758.38  | 69    |
| H66C | 5738.59 | 9958.27  | 5043.44  | 69    |
| H9A  | 6002.47 | -805.95  | 7624.75  | 52    |
| H9B  | 6101.75 | 427.74   | 7096.29  | 52    |
| H63A | 3118.73 | 12010.18 | 2358.5   | 93    |
| H63B | 4308.64 | 13391.84 | 3199.93  | 93    |
| H63C | 3053.77 | 12410.57 | 3509.25  | 93    |

**References:**

1. M. Munda, R. Nandi, V. R. Gavit, S. Kundu, S. Niyogi, and A. Bisai, *Chem. Sci.* 2022, **13**, 11666–11671.
2. R. Nandi, S. Niyogi, S. Kundu, V. R. Gavit, M. Munda, R. Murmu and A. Bisai, *Chem. Sci.*, 2023, **14**, 8047–8053.
3. M. Munda, A. Mondal, N. K. Roy, R. Murmu, S. Niyogi, and A. Bisai, *Chem. Sci.*, 2024, **15**, 9164–9172.
4. L. Ding, J. Münch, H. Goerls, A. Maier, H. H. Fiebig, W. H. Lin and C. Hertweck, *Bioorg. Med. Chem. Lett.*, 2010, **20**, 6685–6687.
5. B. R. Rosen, E. W. Werner, A. G. O'Brien and P. S. Baran, *J. Am. Chem. Soc.*, 2014, **136**, 5571–5574.
6. M. Pfaffenbach, I. Bakanas, N. R. O'Connor, J. L. Herrick and R. Sarpong, *Angew. Chem. Int. Ed.*, 2019, **58**, 15304–15308.
7. K. Takada, H. Kajiwara, and N. Imamura, *J. Nat. Prod.*, 2010, **73**, 698–701.
8. J. Feng, F. Noack and M. J. Krische, *J. Am. Chem. Soc.*, 2016, **138**, 12364–12367.
